# Supplementary material
Source: PubMed Central journal article supplement (PMC4592811)
Supplement: NIHMS711047-supplement-1.pdf [file NIHMS711047-supplement-1.pdf]

# N<sub>2</sub> Binding to an Iron-Sulfur-Carbon Site

*Ilija Čorić, Brandon Q. Mercado, Eckhard Bill, David J. Vinyard, Patrick L. Holland*

## Supplementary Information

|                                                   |    |
|---------------------------------------------------|----|
| <b>Supplementary Methods</b> .....                | 2  |
| <b>Synthesis of LH<sub>2</sub></b> .....          | 4  |
| <b>Synthesis of thiolate 4</b> .....              | 8  |
| <b>Synthesis of iron complexes</b> .....          | 10 |
| <b>Supplementary References</b> .....             | 20 |
| <b>Supplementary Data</b> .....                   | 22 |
| <b>Magnetic Susceptibility Measurements</b> ..... | 22 |
| <b>DFT Calculations</b> .....                     | 25 |
| <b>IR Spectra</b> .....                           | 29 |
| <b>UV-VIS Spectra</b> .....                       | 32 |
| <b>NMR Spectra</b> .....                          | 34 |
| <b>Mössbauer Spectra</b> .....                    | 36 |
| <b>EPR Spectra</b> .....                          | 38 |
| <b>Crystallographic Data</b> .....                | 39 |

## Supplementary Methods

**General Information.** Unless otherwise stated, all manipulations were performed under a nitrogen atmosphere using Schlenk techniques or in an M. Braun glovebox maintained at or below 1 ppm of O<sub>2</sub> and H<sub>2</sub>O. All new iron complexes were prepared and handled in the glovebox under N<sub>2</sub> atmosphere. Unless otherwise stated, all reagents were purchased from commercial suppliers and used without further purification. Perfluoropolyether oil Fomblin<sup>®</sup> Y with average molecular weight of 1800 g/mol was purchased from Sigma-Aldrich, degassed under vacuum overnight, and kept over 4 Å molecular sieves in a N<sub>2</sub>-filled glovebox. Sulfur (99.999%) was purchased from Strem Chemicals. Fe(N(SiMe<sub>3</sub>)<sub>2</sub>)<sub>2</sub> was prepared according to the literature procedure<sup>31</sup>, however in our hands distilled product was found to contain some of what is probably THF adduct Fe(N(SiMe<sub>3</sub>)<sub>2</sub>)<sub>2</sub>(THF)<sup>32</sup>, and the amount used in the reaction was adjusted to account for THF present (determined by <sup>1</sup>H NMR analysis of a solution in THF-*d*<sub>8</sub>). Solid commercial potassium bis(trimethylsilyl)amide was triturated with hexane, dried, and crystallized from toluene at -40 °C prior to use. Glassware was dried at 150 °C overnight, and Celite was dried at 200 °C under vacuum. Pentane, hexane, and diethyl ether were purified by passage through activated alumina and Q5 columns from Glass Contour Co. THF was distilled from a potassium benzophenone ketyl solution under argon. Butane was vacuum transferred from potassium/benzophenone mixture which had been stirred at room temperature for several days. All solvents were stored over activated 4Å molecular sieves. Organic reactions were monitored by thin layer chromatography on silica gel pre-coated plastic sheets with fluorescent indicator (0.2 mm, Macherey-Nagel). Visualization was accomplished by irradiation with UV light at 254 nm. Column chromatography was performed on silica gel (Fisher Chemical, particle size 0.040-0.063 mm).

NMR data were recorded on Agilent DD2 400 MHz, Agilent DD2 500 MHz, or Agilent DD2 600 MHz spectrometers in deuterated solvents. Chemical shifts in <sup>1</sup>H NMR spectra were referenced

using residual solvent protons (THF-*d*<sub>8</sub> (1.73 ppm), C<sub>6</sub>D<sub>6</sub> (7.16 ppm), CDCl<sub>3</sub> (7.26 ppm)), and reported in ppm ( $\delta$ ) relative to tetramethylsilane. Data are reported as follows: chemical shift, multiplicity (s = singlet, d = doublet, q = quartet, 7-et = heptet, m = multiplet, br = broad), coupling constants (Hz) and integration. Resonances in <sup>13</sup>C NMR and <sup>19</sup>F NMR spectra are referenced using absolute referencing, and reported in ppm ( $\delta$ ) relative to tetramethylsilane and CCl<sub>3</sub>F, respectively. High resolution mass spectrometry (HRMS) measurements were performed on a Bruker Apex 9.4T Fourier Transform Ion Cyclotron Resonance Mass Spectrometer (Keck Biotechnology Resource Laboratory at Yale University) or a Waters 70-VSE (University of Illinois SCS Mass Spectrometry Laboratory). Elemental analyses were performed at the CENTC Elemental Analysis Facility at the University of Rochester. Microanalysis samples were weighed with a PerkinElmer Model AD-6 Autobalance and their compositions were determined with a PerkinElmer 2400 Series II Analyzer, and handled in a VAC Atmospheres glovebox under argon. IR data were recorded on a Bruker Alpha spectrometer equipped with a Platinum ATR attachment. The spectra often have an instrumental artifact around 2200 cm<sup>-1</sup>, showing a "negative" peak that we have been unable to eliminate. Mössbauer data were recorded on a SEE Co. MS4 Mössbauer spectrometer with alternating constant acceleration integrated with a Janis SVT-400T He/N<sub>2</sub> cryostat for measurements at 80 K with a 0.07 T applied magnetic field. Isomer shifts were determined relative to  $\alpha$ -Fe at 298 K. All Mössbauer spectra were fit to Lorentzian doublets using the program WMoss (SEE Co.). UV-vis spectra were recorded on a Cary 60 spectrophotometer using Schlenk-adapted quartz cuvettes with a 1 mm optical path length unless otherwise specified. Solution magnetic susceptibilities were determined by the Evans method<sup>33</sup>. X-band EPR spectra were recorded on a Bruker ELEXSYS E500 EPR spectrometer equipped with an SHQ resonator and an Oxford Instruments ESR-900 helium-flow cryostat. EPR spectra were simulated using the "pepper" function in

EasySpin version 4.5.5, with H-strain option to describe anisotropic broadening from unresolved hyperfine interactions<sup>34</sup>.

## Synthesis of LH<sub>2</sub>

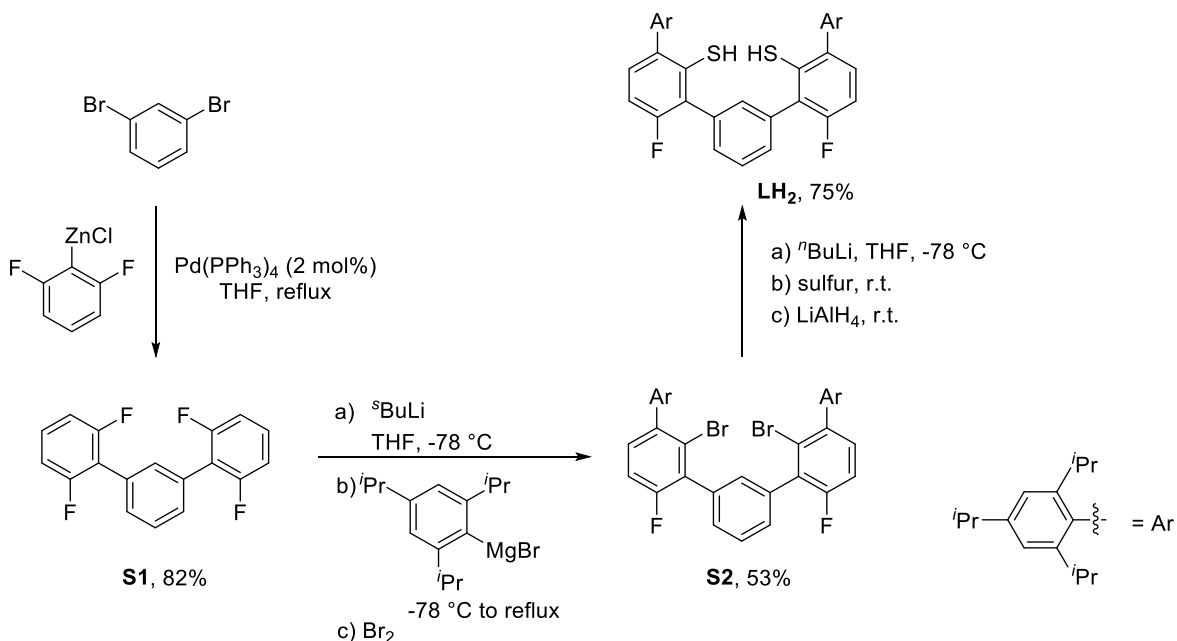

### 2,2',6,6'-Tetrafluoro-1,1':3',1''-terphenyl (S1)

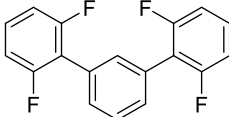
 A 2.5 M solution of <sup>t</sup>BuLi in hexanes (12.8 mL, 32.0 mmol) at room temperature was added slowly to a solution of 1,3-difluorobenzene (3.65 g, 32.0 mmol) in THF (48 mL) at -78 °C under N<sub>2</sub> atmosphere. After stirring for 70 min at -78 °C, a 1.9 M solution of ZnCl<sub>2</sub> in 2-methyltetrahydrofuran (19.6 mL, 37.3 mmol) at room temperature was added slowly to the cold reaction mixture. The resulting mixture was stirred for 5 min at -78 °C, the cooling bath was then removed, and the mixture was allowed to warm to room temperature with stirring. 1,3-Dibromobenzene (2.52 g, 10.7 mmol) and Pd(PPh)<sub>4</sub> were added to the mixture at room temperature under N<sub>2</sub> atmosphere. The resulting mixture was heated to reflux (oil bath heating) for 24 h, then kept at room temperature for 2 days. The mixture was exposed to air, the solvent was removed under reduced pressure and the residue was separated between water (50 mL) and hexane (50 mL). The organic layer was collected, and

the aqueous layer was extracted with hexane (2 × 30 mL). The combined organic extracts were dried (MgSO<sub>4</sub>), filtered, and the solvent was removed under reduced pressure. The residue was purified by column chromatography on silica gel using hexane as the eluent yielding the title compound as a colorless oil that crystallizes upon standing at room temperature (2.64 g, 82%). <sup>1</sup>H NMR (400 MHz, CDCl<sub>3</sub>) δ 7.60 (s, 1H), 7.59 – 7.49 (m, 3H), 7.35 – 7.24 (m, 2H), 7.05 – 6.95 (m, 4H). <sup>13</sup>C{<sup>1</sup>H} NMR (101 MHz, CDCl<sub>3</sub>) δ 160.1 (dd, *J* = 248.9, 7.0 Hz), 132.3 (quintet, *J* = 1.9 Hz), 130.1 (t, *J* = 2.0 Hz), 129.2, 129.0 (t, *J* = 10.4 Hz), 128.2, 118.1 (t, *J* = 18.5 Hz), 112.0 – 111.3 (m). <sup>19</sup>F NMR (376 MHz, CDCl<sub>3</sub>) δ -114.37 – -114.48 (m). HRMS (ESI<sup>+</sup>) (*m/z*): [M+Na] calcd for C<sub>18</sub>H<sub>10</sub>F<sub>4</sub>Na, 325.0611; found, 325.0608.

## Dibromide S2

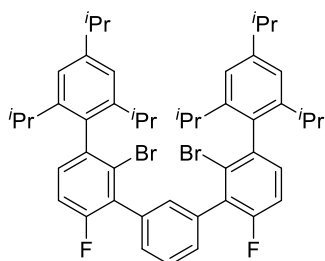

To Mg turnings (1.13 g, 46.4 mmol) activated with 1,2-dibromoethane (0.1 mL) in THF (5 mL) under N<sub>2</sub> atmosphere, 1-bromo-2,4,6-triisopropylbenzene (11.95 g, 42.2 mmol) and THF (35 mL) were added alternately. Heating was applied with a heat gun early in the reaction to initiate the reaction, and then the rate of addition was varied to maintain reflux. After complete addition, the mixture was heated to reflux (oil bath heating) for 20 h, and allowed to cool to room temperature briefly before it was added to the reaction mixture below. In a separate flask, a 1.4 M solution of <sup>s</sup>BuLi in cyclohexane (12.7 mL, 17.7 mmol) was added dropwise to a solution of 2,2'',6,6''-tetrafluoro-1,1':3',1''-terphenyl (**S1**, 2.55 g, 8.44 mmol) in THF (44 mL) at -78 °C under N<sub>2</sub> atmosphere. After being stirred for 20 min at -78 °C, to the reaction mixture the Grignard solution prepared above was added via syringe (first half dropwise). After complete addition the cooling bath was removed, and the mixture was allowed to warm to room temperature, and was then heated to reflux (oil bath heating) for 3.5 h.

This mixture was then cooled to  $-78\text{ }^{\circ}\text{C}$  and  $\text{Br}_2$  (7.42 g, 46.4 mmol) was added dropwise, and the mixture was stirred for 10 min at  $-78\text{ }^{\circ}\text{C}$ . The cooling bath was then removed, and the mixture was allowed to warm to  $0\text{ }^{\circ}\text{C}$ . To the reaction mixture concentrated aqueous solutions of sodium thiosulfate (20 mL), water (20 mL), and hexane (110 mL) were then added, and the resulting mixture was stirred vigorously. The mixture was exposed to air, the organic layer was separated and aqueous layer was extracted with ethyl acetate ( $1 \times 75\text{ mL}$ ,  $1 \times 35\text{ mL}$ ). The combined organic extracts were dried over  $\text{MgSO}_4$ , filtered, and the solution was concentrated under reduced pressure at  $40\text{ }^{\circ}\text{C}$  to a total weight of 63 g. The solution was then left at room temperature for 2 hours, during which time a colorless solid precipitated. The precipitate was filtered off, washed with ethyl acetate ( $3 \times 6\text{ mL}$ ), and dried under reduced pressure. To remove residual ethyl acetate, the solid was dissolved in THF (20 mL) with heating, concentrated and dried (repeated two more times). The title compound was obtained as a colorless solid (3.69 g, 53%). Although  $^1\text{H}$ -NMR analysis indicates a presence of a minor impurity, the material was used for the next step without further purification.  $^1\text{H}$  NMR (500 MHz,  $\text{CDCl}_3$ )  $\delta$  7.59 (t,  $J = 8.0\text{ Hz}$ , 1H), 7.47 (dd,  $J = 7.6, 1.6\text{ Hz}$ , 2H), 7.45 (br s, 1H), 7.18 (d,  $J = 7.2\text{ Hz}$ , 4H), 7.07 (s, 4H), 2.96 (7-et,  $J = 6.9\text{ Hz}$ , 2H), 2.51 (7-et,  $J = 6.9\text{ Hz}$ , 4H), 1.32 (d,  $J = 6.9\text{ Hz}$ , 12H), 1.19 (d,  $J = 7.2\text{ Hz}$ , 12H), 1.08 (d,  $J = 6.8\text{ Hz}$ , 12H).  $^{13}\text{C}\{^1\text{H}\}$  NMR (126 MHz,  $\text{CDCl}_3$ )  $\delta$  158.7 (d,  $J = 248.5\text{ Hz}$ ), 148.6, 146.1, 138.3 (d,  $J = 3.9\text{ Hz}$ ), 135.7, 135.1, 132.3, 131.1 (d,  $J = 8.3\text{ Hz}$ ), 130.8 (d,  $J = 18.3\text{ Hz}$ ), 129.8, 127.8, 127.2, 120.8, 114.2 (d,  $J = 22.8\text{ Hz}$ ), 34.2, 30.8, 24.7, 24.0, 23.6.  $^{19}\text{F}$  NMR (471 MHz,  $\text{CDCl}_3$ )  $\delta$  -111.17, -111.54 (*syn* and *anti* rotamers). HRMS (FAB $^+$ ) ( $m/z$ ): [M] calcd for  $\text{C}_{48}\text{H}_{54}\text{Br}_2\text{F}_2$ , 826.2561; found, 826.2550.

## LH<sub>2</sub>

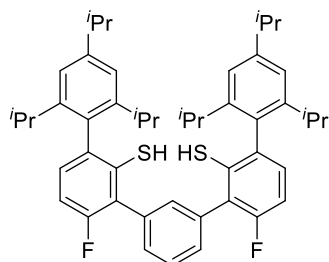

Dibromide **S2** (3.64 g, 4.39 mmol) was dissolved in THF (50 mL) with heating under N<sub>2</sub> atmosphere. The solution was then cooled to -78 °C and a 2.5 M solution of <sup>t</sup>BuLi in hexanes (4.39 mL, 11.0 mmol) was added dropwise. The mixture was stirred for 35 min at -78 °C, and then sulfur powder (1.06 g, 32.9 mmol) was added under positive pressure of N<sub>2</sub>. The resulting mixture was stirred for 15 min at -78 °C. The cooling bath was then removed, and the mixture was allowed to warm to room temperature, then stirred at room temperature for 30 min. To the resulting reaction mixture LiAlH<sub>4</sub> (833 mg, 22.0 mmol) was added in portions over 15 minutes, keeping the reaction temperature close to room temperature with occasional brief cooling with dry ice/acetone cooling bath. After complete addition, the mixture was stirred at room temperature for further 140 min. The resulting mixture was treated with concentrated aqueous HCl in small portions until pH < 2, keeping the reaction temperature close to room temperature with occasional brief cooling with dry ice/acetone cooling bath (CAUTION: toxic H<sub>2</sub>S gas evolving). To the resulting gray suspension, hexane (40 mL) and excess solid NaCl were added, and the resulting mixture was stirred vigorously for 5-10 minutes. The mixture was exposed to air, the organic solution was decanted, and the precipitate was washed with hexane (3 × 40 mL, mixture stirred vigorously each time before decanting). The combined organic solutions were dried over MgSO<sub>4</sub>, filtered, and the solvent was removed under reduced pressure. The residue was crystallized by dissolving in boiling hexane (*ca.* 110 mL) and standing at room temperature for 1 day. The solid product was filtered off, washed with hexane (3 × 4 mL), and dried in vacuum, yielding the title compound as a white solid (1.96 g). An additional 0.47 g of the product was obtained by concentrating the mother liquor, and crystallizing the same way from hexane (*ca.* 25 mL). The total product isolated was 2.43 g (75%). Although <sup>1</sup>H NMR analysis indicates a presence of a minor impurity, the material

was used for preparation of iron complex without further purification.  $^1\text{H}$  NMR (500 MHz,  $\text{CDCl}_3$ )  $\delta$  7.62 (t,  $J = 7.4$  Hz, 1H), 7.53 – 7.46 (m, 3H), 7.10 (s, 4H), 7.08 – 7.03 (m, 2H), 6.97 (t,  $J = 8.6$  Hz, 2H), 3.32 (s, 2H), 2.95 (7-et,  $J = 6.9$  Hz, 2H), 2.55 (7-et,  $J = 6.9$  Hz, 4H), 1.31 (d,  $J = 6.9$  Hz, 12H), 1.20 (d,  $J = 6.9$  Hz, 12H), 1.08 (d,  $J = 6.9$  Hz, 12H).  $^{13}\text{C}\{^1\text{H}\}$  NMR (126 MHz,  $\text{CDCl}_3$ )  $\delta$  158.9 (d,  $J = 245.8$  Hz), 149.1, 147.0, 136.4 (d,  $J = 2.7$  Hz), 134.9, 134.4, 134.0 (d,  $J = 3.8$  Hz), 131.9, 130.5 (d,  $J = 8.3$  Hz), 130.1, 128.9, 126.8 (d,  $J = 18.7$  Hz), 121.3, 111.4 (d,  $J = 23.0$  Hz), 34.3, 30.6, 24.8, 24.0, 23.7.  $^{19}\text{F}$  NMR (471 MHz,  $\text{CDCl}_3$ )  $\delta$  -114.55. HRMS (FAB $^+$ ) ( $m/z$ ): [M] calcd for  $\text{C}_{48}\text{H}_{56}\text{F}_2\text{S}_2$ , 734.3792; found, 734.3810.

## Synthesis of thiolate 4

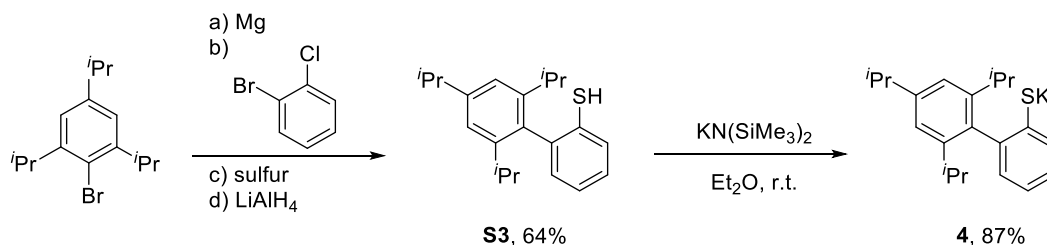

## 2',4',6'-Triisopropyl-[1,1'-biphenyl]-2-thiol (S3)

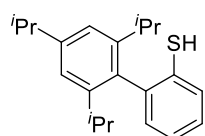

To magnesium turnings (1.22 g, 50.0 mmol) activated with 1,2-dibromoethane (0.1 mL) in hot THF (5 mL) under  $\text{N}_2$  atmosphere, 1-bromo-2,4,6-triisopropylbenzene (5.67 g, 20.0 mmol) and THF (25 mL) were added alternately to maintain reflux.

After complete addition the mixture was refluxed (oil bath heating) for 17 h. To the refluxing reaction mixture 1-bromo-2-chlorobenzene (3.83 g, 20.0 mmol) was added in portions (0.1 mL/2.5 min). After complete addition, the mixture was further refluxed for 6 h. Hot Grignard solution was then transferred (10 mL of THF used for washing the flask) quickly (to avoid precipitation upon cooling) to the



suspension of sulfur (1.92 g) in THF (10 mL) at -78 °C (cooling causes the resulting mixture to solidify). The cooling bath was removed and the mixture was allowed to freely warm to room temperature and then further stirred for 14 h at room temperature. To the resulting reaction mixture lithium aluminum hydride (1.52 g, 40.0 mmol) was added in portions over 30 minutes, keeping the reaction temperature close to room temperature with occasional brief cooling with dry ice/acetone cooling bath. After complete addition, the mixture was stirred at room temperature for further 5.5 h. The resulting mixture was treated with concentrated aqueous HCl (20 mL) added in small portions over 1.5 h, keeping the reaction temperature close to room temperature with occasional brief cooling with dry ice/acetone cooling bath (CAUTION: toxic H<sub>2</sub>S gas evolving). To the resulting slurry hexane (50 mL) and solid NaCl (10 g) were added, and the resulting mixture stirred vigorously for few minutes. The mixture was exposed to air, the organic solution was then decanted from aqueous slurry, and slurry washed with hexane (3 × 10 mL, mixture stirred vigorously each time before decanting). Combined organic solutions were dried over MgSO<sub>4</sub>, filtered, and the solvent was removed under reduced pressure. The residue was purified by column chromatography on silica gel using hexane as the eluent yielding the title compound as a colorless solid (3.97 g, 64%). <sup>1</sup>H NMR (400 MHz, C<sub>6</sub>D<sub>6</sub>) δ 7.25 (s, 2H), 7.11 – 7.07 (m, 1H), 7.07 – 7.04 (m, 1H), 6.94 – 6.83 (m, 2H), 3.07 (s, 1H), 2.86 (7-et, *J* = 7.0 Hz, 1H), 2.72 (7-et, *J* = 6.9 Hz, 2H), 1.30 (d, *J* = 6.9 Hz, 6H), 1.26 (d, *J* = 6.9 Hz, 6H), 1.10 (d, *J* = 6.9 Hz, 6H). <sup>13</sup>C{<sup>1</sup>H} NMR (101 MHz, C<sub>6</sub>D<sub>6</sub>) δ 149.0, 147.0, 138.3, 135.1, 133.7, 130.7, 127.9, 127.6, 124.7, 121.2, 34.5, 30.6, 24.7, 24.0, 23.7. HRMS (ESI<sup>-</sup>) (*m/z*): [M-H] calcd for C<sub>21</sub>H<sub>27</sub>S, 311.1839; found, 311.1832.

## Potassium 2',4',6'-triisopropyl-[1,1'-biphenyl]-2-thiolate (4)

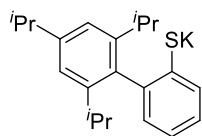

A solution of potassium bis(trimethylsilyl)amide (99.7 mg, 0.500 mmol) in diethyl ether (2 mL, additional 2 × 1 mL used for washing the vial) was added to a solution of 2',4',6'-triisopropyl-[1,1'-biphenyl]-2-thiol (156.3 mg, 0.500 mmol) in diethyl ether (1 mL) at room temperature in an N<sub>2</sub>-filled glovebox. A colorless solid immediately precipitated. After 30 min the solid was filtered off, washed with diethyl ether (3 × 2 mL), and dried under vacuum yielding the title compound as a colorless solid (152 mg, 87%). <sup>1</sup>H NMR (400 MHz, THF-*d*<sub>8</sub>) δ 7.36 – 7.27 (m, 1H), 7.02 (s, 2H), 6.67 (td, *J* = 7.4, 1.8 Hz, 1H), 6.60 (dd, *J* = 7.4, 1.8 Hz, 1H), 6.53 (td, *J* = 7.1, 1.4 Hz, 1H), 2.91 (7-et, *J* = 6.9 Hz, 1H), 2.76 (7-et, *J* = 6.9 Hz, 2H), 1.30 (dd, *J* = 6.9, 2.0 Hz, 6H), 1.19 (d, *J* = 6.9 Hz, 6H), 0.96 (d, *J* = 6.9 Hz, 6H). <sup>13</sup>C{<sup>1</sup>H} NMR (101 MHz, THF-*d*<sub>8</sub>) δ 157.1, 147.1, 145.8, 143.0, 140.7, 134.9, 128.4, 124.7, 119.5, 116.7, 34.2, 30.0, 24.0, 23.7, 23.6. Anal. Calcd for C<sub>21</sub>H<sub>27</sub>KS: C, 71.94; H, 7.76; N, 0.00. Found: C, 71.59; H, 7.88; N, -0.12.

## Synthesis of iron complexes

### LFe(THF)<sub>2</sub> (1)

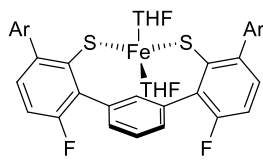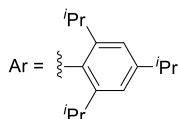

A solution of Fe(N(SiMe<sub>3</sub>)<sub>2</sub>)<sub>2</sub> (0.720 mmol) in THF (1 mL, additional 0.5 mL used for washing the vial) was added to a stirring solution of LH<sub>2</sub> (544 mg, 0.740 mmol) in THF (4.5 mL) at room temperature under N<sub>2</sub> atmosphere. The color of the solution immediately turned dark yellow, and yellow precipitate started forming after few minutes. After being stirred for 135 min at room temperature, the mixture was cooled to -40 °C for 5 hours. The yellow precipitate was filtered off cold,

washed with cold (-40 °C) THF (2 × 0.5 mL), dried under vacuum for 10 min, then crushed into a fine powder with a spatula, and dried for a further 30 min under vacuum. The title compound was obtained as a yellow powder, 568 mg, 82%. <sup>1</sup>H NMR (500 MHz, THF-*d*<sub>8</sub>) δ 25.2 (br s, 2H), 23.2 (s, 2H), 4.7 (s, 2H), 4.3 (s, 2H), 3.6 (s, 8H, THF), 2.4 (br s, 2H), 1.8 (s, 8H, THF), 1.1 (s, 6H), 0.04 – -0.02 (m, 15H), -1.2 (br s, 6H), -1.4 (s, 6H), -3.8 (s, 6H), -7.3 (br s, 2H), -26.7 (s, 2H), -61.6 (br s, 1H). <sup>19</sup>F NMR (471 MHz, THF-*d*<sub>8</sub>) δ -65.3 (s). IR (cm<sup>-1</sup>): 2955 (s), 2929 (m), 2888 (m), 2864 (m), 1607 (w), 1597 (w), 1575 (m), 1561 (w), 1479 (w, sh), 1459 (s), 1448 (m, sh), 1429 (vw), 1397 (w), 1374 (m), 1359 (s), 1340 (w), 1318 (w), 1236 (m), 1215 (m), 1192 (vw), 1183 (w), 1169 (w), 1135 (w), 1099 (w), 1090 (vw), 1078 (w), 1069 (m), 1054 (w), 1031 (m), 1021 (m), 1010 (w), 996 (vw), 948 (vw), 912 (w), 894 (s), 873 (s), 864 (s, sh), 841 (m), 821 (w), 806 (s), 786 (m), 779 (w), 752 (m), 718 (m), 696 (vw), 677 (w), 651 (m), 578 (vw), 542 (m), 517 (vw), 504 (w), 474 (w), 429 (w), 417 (vw). Anal. Calcd for C<sub>56</sub>H<sub>70</sub>F<sub>2</sub>FeO<sub>2</sub>S<sub>2</sub>: C, 72.08; H, 7.56; N, 0.00. Found: C, 71.82; H, 7.68; N, -0.02.  $\mu_{\text{eff}}$  (THF-*d*<sub>8</sub>, 25 °C) = 5.2(1)  $\mu_{\text{B}}$ . UV-vis (THF, 21 °C;  $\lambda_{\text{max}}$ , nm ( $\epsilon$ , mM<sup>-1</sup>cm<sup>-1</sup>)): 348 (7.4), 389 (sh). Zero-field Mössbauer (80 K):  $\delta$  = 0.89 mm/s,  $|\Delta E_{\text{Q}}|$  = 3.77 mm/s. Single crystals for X-ray analysis were obtained by slow cooling of a hot solution of LFe(THF)<sub>2</sub> (33 mg) in THF (0.3 mL).

## LFeK (2)

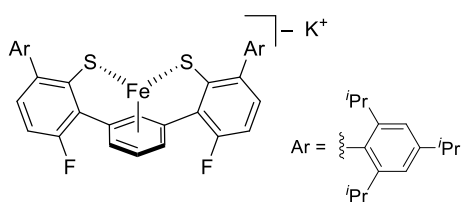

THF was briefly dried over activated alumina prior to use. All manipulations were performed in N<sub>2</sub> filled glovebox (<0.3 ppm O<sub>2</sub>) in a cold well using dry ice/acetone cooling bath. The temperature in the cold well during the reaction was -70 °C. All

equipment, glassware, solutions and solvents used in the procedure were cooled in the cold well before use. LFe(THF)<sub>2</sub> (1, 46.7 mg, 0.0500 mmol) was dissolved in THF (1.5 mL) with slight heating, and then

immediately cooled to  $-70\text{ }^{\circ}\text{C}$ . To the stirred cold yellow solution, a cold suspension of  $\text{KC}_8$  (7.1 mg, 0.053 mmol, 1.05 equiv) in THF (0.2 mL, additional 0.1 mL of cold THF used for washing the vial) was added. After being stirred for 45 min at  $-70\text{ }^{\circ}\text{C}$  the brown-yellow mixture was diluted with cold hexane (2 mL), filtered cold (short plug of Celite in a pipette), and then further diluted with cold hexane (6 mL). The resulting brown-yellow solution was left in the freezer ( $-40\text{ }^{\circ}\text{C}$ ) for 2 days, during which time large brown-yellow crystals formed. The solution was quickly removed with a pipette from the crystals while cold, and the crystals were quickly washed with cold THF/hexane 1:5 ( $2 \times 0.5\text{ mL}$ , precooled at  $-40\text{ }^{\circ}\text{C}$ ). The product was dried under vacuum, then crushed into a fine powder with a spatula, and dried for further several hours under vacuum. The title compound was obtained as a brown powder, 36 mg. The product contained residual THF (1.54 equiv) which was quantified by integration of  $^1\text{H}$  NMR spectra of the diamagnetic region; sample weights used for analyses were corrected by multiplying with the factor 0.88. The corrected yield is 32 mg, 77%.  $^1\text{H}$  NMR (500 MHz,  $\text{THF-}d_8$ )  $\delta$  7.1 (br s, 2H), 6.9 (br s, 2H), 4.7 (overlapped br s, 3H), 2.8 (overlapped s, 4H), 2.6-1.8 (overlapped br s, 12H), 1.2 (br s, 18H), 0.6 (br s, 6H). IR ( $\text{cm}^{-1}$ ): 3050 (vw), 2955 (s), 2929 (m), 2864 (m), 1588 (w), 1559 (w), 1484 (w), 1458 (s), 1449 (s), 1427 (w, sh), 1373 (m), 1359 (m), 1346 (m, sh), 1317 (w), 1295 (w), 1268 (vw), 1237 (m), 1210 (s), 1184 (w), 1169 (w), 1136 (m), 1100 (w), 1049 (s), 1006 (w), 976 (vw), 945 (vw), 940 (vw), 896 (s), 875 (m), 847 (w), 840 (w), 827 (w), 797 (s, sh), 790 (s), 756 (w), 687 (vw), 667 (vw), 652 (w), 613 (vw), 573 (vw), 540 (w, sh), 533 (m), 495 (w, sh), 489 (w), 429 (w), 422 (vw), 408 (vw). Anal. Calcd for  $\text{C}_{48}\text{H}_{54}\text{F}_2\text{FeKS}_2(\text{C}_4\text{H}_8\text{O})_{1.54}$ : C, 69.27; H, 7.12; N, 0.00. Found: C, 69.38; H, 7.09; N, -0.24.  $\mu_{\text{eff}}$  ( $\text{THF-}d_8$ ,  $24\text{ }^{\circ}\text{C}$ ) = 2.1(1)  $\mu_{\text{B}}$ . UV-vis ( $\text{THF}$ ,  $21\text{ }^{\circ}\text{C}$ ;  $\lambda_{\text{max}}$ , nm ( $\epsilon$ ,  $\text{mM}^{-1}\text{cm}^{-1}$ ): 745 (1.1), 464 (1.7, sh), 408 (3.4, sh), 378 (5.7), 306 (8.2, sh). Zero-field Mössbauer (80 K):  $\delta = 0.59\text{ mm/s}$ ,  $|\Delta E_{\text{Q}}| = 0.53\text{ mm/s}$ . Single crystals for X-ray analysis were obtained as follows. A sample (0.5 mL) of the reaction mixture

after dilution with hexane at  $-70\text{ }^{\circ}\text{C}$  was added to hexane (0.5 mL) at room temperature. After 16 h at room temperature brown-yellow needles formed.

### [LFeSC<sub>6</sub>H<sub>4</sub>Ar]K (5)

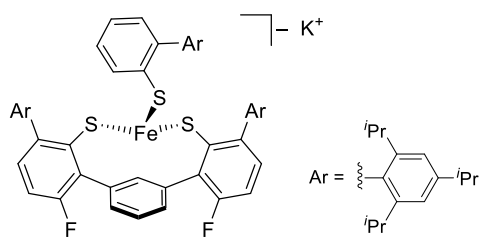

LFe(THF)<sub>2</sub> (**1**, 272 mg, 0.291 mmol) was weighed in a vial and most of the solid was transferred with a spatula to a vial containing potassium 2',4',6'-triisopropyl-[1,1'-biphenyl]-2-thiolate (**4**, 102 mg, 0.291 mmol). To the combined solids THF (1.5 mL) was added, and the remaining LFe(THF)<sub>2</sub> was added by washing the vial with THF (3 × 0.5 mL). The color of the solution immediately turned orange, and after a few minutes the solids completely dissolved. After stirring for 15 min at room temperature, the solution was concentrated under vacuum. The brownish-orange residue was dissolved in Et<sub>2</sub>O (1 mL), and the resulting solution was filtered (short plug of Celite, additional 3 × 0.2 mL of Et<sub>2</sub>O were used for washing the vial and the plug). A layer of pentane (2.5 mL) was carefully added above the solution, and the layer diffusion setup was left at room temperature for 1 day. The precipitate was washed with 1:1 Et<sub>2</sub>O/pentane (2 × 0.5 mL), dried under vacuum, crushed into a fine powder with a spatula, and dried for further several hours under vacuum. The title compound was obtained as an orange powder, 312 mg. The product contained residual solvent: THF (0.74 equiv), Et<sub>2</sub>O (0.34 equiv), and pentane (0.31 equiv), as determined by integration of <sup>1</sup>H NMR spectra of the diamagnetic region. The corrected yield is 287 mg, 87%. <sup>1</sup>H NMR (600 MHz, THF-*d*<sub>8</sub>) δ 44.0 (s, 1H), 29.6 (br s, 1H), 28.8 (s, 2H), 22.2 (br s, 2H), 19.7 (br s, 2H), 14.6 (s, 2H), 7.5 – 7.3 (m, 18H), 7.0 (s, 1H), 6.5 (s, 6H), 5.4 (s, 2H), 3.9 (s, 6H), 2.6 (s, 2H), 0.5 (s, 2H), -1.3 (s, 6H), -1.5 (s, 6H), -1.5 (s, 6H), -3.9 (s, 6H), -8.1 (s, 2H), -22.6 (s, 1H), -23.7 (s, 2H), -43.8 (overlapped

br s, 3H), -99.6 (s, 1H); (one of the 1H peaks could not be located, but might be a part of the 7.49 – 7.30 ppm multiplet).  $^{19}\text{F}$  NMR (376 MHz, THF- $d_8$ ):  $\delta$  -41.85 (br s). IR ( $\text{cm}^{-1}$ ): 2955 (s), 2928 (m), 2906 (m, sh), 2865 (m), 1606 (w), 1595 (w), 1579 (w), 1569 (w), 562 (w), 1480 (vw), 1459 (s), 1447 (m, sh), 1425 (w), 1392 (vw), 1376 (m), 1359 (m), 1339 (vw), 1319 (w), 1307 (vw, sh), 1239 (m), 1211 (m), 1182 (w), 1168 (w), 1152 (vw), 1133 (w), 1121 (w), 1098 (w), 1068 (m), 1048 (m), 1035 (m), 1005 (w), 947 (vw), 937 (vw), 916 (vw), 903 (m, sh), 890 (s), 873 (s), 841 (m), 819 (vw), 804 (s), 787 (m), 761 (m), 750 (m), 738 (s), 713 (s), 668 (w), 651 (m), 594 (vw), 578 (vw), 563 (vw), 542 (m), 517 (w), 502 (m), 465 (w), 429 (w), 415 (w). Anal. Calcd for  $\text{C}_{69}\text{H}_{81}\text{F}_2\text{FeKS}_3(\text{C}_4\text{H}_8\text{O})_{0.74}(\text{C}_4\text{H}_{10}\text{O})_{0.34}(\text{C}_5\text{H}_{12})_{0.31}$ : C, 72.50; H, 7.65; N, 0.00. Found: C, 72.29; H, 7.66; N, -0.18.  $\mu_{\text{eff}}$  (THF- $d_8$ , 24 °C) = 5.3(1)  $\mu_{\text{B}}$ . UV-vis (THF, 21°C;  $\lambda_{\text{max}}$ , nm ( $\epsilon$ ,  $\text{mM}^{-1}\text{cm}^{-1}$ ): 343 (sh, 9.7), 400 (sh, 4.8). Zero-field Mössbauer (80 K):  $\delta$  = 0.69 mm/s,  $|\Delta E_{\text{Q}}|$  = 1.50 mm/s. Single crystals for X-ray analysis were obtained by slow evaporation of a solution of  $[\text{LFeSC}_6\text{H}_4\text{Ar}]\text{K}$  (30 mg, crude product after concentration of the reaction mixture) in  $\text{Et}_2\text{O}$  (0.2 mL) at room temperature.

### $[\text{LFeSC}_6\text{H}_4\text{Ar}(\text{THF})]\text{K}$ (**5**·THF)

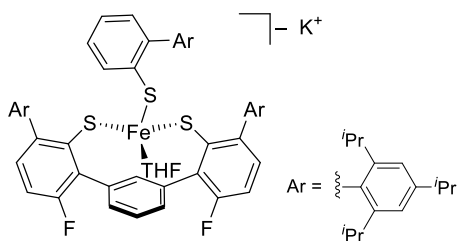

$[\text{LFeSC}_6\text{H}_4\text{Ar}(\text{THF})]\text{K}$  (**5**·THF) is in equilibrium with  $[\text{LFeSC}_6\text{H}_4\text{Ar}]\text{K}$  (**5**) in THF solution (see Supplementary Data/UV-Vis spectra). Single crystals of  $[\text{LFeSC}_6\text{H}_4\text{Ar}(\text{THF})]\text{K}$  for X-ray analysis were obtained from a concentrated solution of **5** in

THF at -40 °C.

**[LFeN<sub>2</sub>][K(18-crown-6)(THF)<sub>2</sub>]<sub>2</sub> (3)**

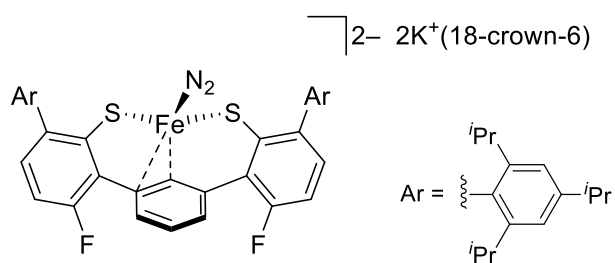

THF was briefly dried over activated alumina prior to use. All manipulations were performed in an N<sub>2</sub> filled glovebox (<0.2 ppm O<sub>2</sub>) in a cold well using a dry ice/acetone cooling bath. The temperature in the cold well during the reaction was -70 °C. All equipment, glassware, solutions and solvents used in the procedure were cooled in the cold well before use. Volumes of solvents used for the reaction were measured with a syringe at room temperature.

**Procedure A:** A cold suspension of K<sub>2</sub>C<sub>8</sub> (28.5 mg, 0.211 mmol, 2.4 equiv) in THF (0.6 mL, additional 2 × 0.2 mL of cold THF used for washing the vial) was added to a stirred cold solution of [LFeSC<sub>6</sub>H<sub>4</sub>Ar]K (**5**, 100.3 mg, 0.0880 mmol) in THF (1 mL) at -70 °C. After the deep red-black mixture was stirred for 40 min at -70 °C, a solution of 18-crown-6 (93.0 mg, 0.352 mmol) in THF (0.6 mL) was added. (Cooling in the cold well causes precipitation of crown ether from the solution of 18-crown-6 in THF, so it was briefly warmed until it dissolved before adding.) The mixture was stirred for 1 min at -70 °C, and then filtered cold (short plug of Celite in a pipette, additional 0.4 mL of cold THF were used for washing the vial and the plug) to a cold 20 mL vial. The resulting dark red-black solution was left undisturbed in a freezer at -38 °C for 24 h, during which time dark crystals precipitated. A small glass frit filter was cooled at -70 °C in the cold well, and the vial was quickly removed from the freezer and filtered. The solution was pushed through the filter with cold nitrogen using a cooled syringe. Cold THF (2 × 0.5 mL) was used for washing the vial and the solid, and then solid was additionally washed with cold THF (0.5 mL) and cold butane (3 × 0.5 mL). (The filtrate was added to 2 M HCl in Et<sub>2</sub>O (2 mL) at -70 °C, the mixture was concentrated, the residue was dissolved in toluene-*d*<sub>8</sub>, and an internal standard

of  $\text{Ph}_3\text{CH}$  was added. Integration of  $^1\text{H}$  NMR spectra showed that the amounts of the **S3** and  $\text{LH}_2$  were 1.04 equiv. and 0.09 equiv., respectively, relative to the amount of **5** used in the reaction.) The solid was then dried by passing cold nitrogen (*ca.* 45 mL) through the filter using the cold syringe. The product was then transferred to a cold vial and samples for analyses were prepared at  $-70\text{ }^\circ\text{C}$ . This yielded a dark brown solid, 224 mg (balanced cold and loosely capped), which contains  $>30\%$  butane by  $^1\text{H}$  NMR analysis (NMR sample prepared similarly as described in procedure B below).

IR spectra were recorded by transferring the cold sample to the ATR in the glove box rapidly. The sample for SQUID magnetometry was prepared at  $-70\text{ }^\circ\text{C}$  by placing *ca.* 20-30 mg of the product in a short J. Young NMR tube using a small aluminum funnel. The sample was secured at the bottom of the tube by placing quartz wool above the sample. The tube was closed and taken cold outside the glovebox, immediately placed in liquid  $\text{N}_2$ , and sealed below the J. Young adapter. The amount of the sample used (16.2 mg) was determined after the measurement by quantification of the ligand as described in procedure B below. Details of the SQUID measurement are given below. The sample for Mössbauer analysis was transferred in the cold well to a cold plastic cup holder. IR ( $\text{cm}^{-1}$ ): 2956 (m), 2923 (m, sh), 2895 (m, sh), 2863 (m), 1869 (s,  $\nu_{\text{NN}}$ ), 1605 (vw), 1579 (w), 1566 (w), 1548 (w), 1459 (m), 1440 (w), 1376 (w), 1350 (s), 1317 (w), 1297 (w), 1285 (w), 1248 (m), 1237 (w, sh), 1198 (w), 1183 (w), 1169(vw), 1130 (m), 1102 (s), 1070 (s), 1058(s, sh), 998 (w), 960 (s), 914 (w, sh), 899 (m, sh), 890 (s), 872 (m), 837 (s), 783 (m), 762 (w), 748 (w), 731 (w), 686 (vw), 650 (w), 539 (w, sh), 530 (w), 505 (w, sh), 485 (vw), 466 (vw), 419 (vw).  $\nu_{\text{NN}} = 1869\text{ cm}^{-1}$ . This N-N stretching frequency is somewhat lower than observed in samples washed only with cold THF (procedure E,  $1880\text{ cm}^{-1}$ ). This is probably due to washing the product with butane, which could remove THF molecules present in the crystals (see X-ray crystallography data for **3** below). Zero-field Mössbauer (80 K):  $\delta = 0.75\text{ mm/s}$ ,  $|\Delta E_Q| = 1.77\text{ mm/s}$ .



**Procedure B:** A cold suspension of  $\text{KC}_8$  (28.5 mg, 0.211 mmol, 2.4 equiv) in THF (0.4 mL, additional  $2 \times 0.2$  mL of cold THF used for washing the vial) was added to a stirred cold solution of  $[\text{LFeSC}_6\text{H}_4\text{Ar}]\text{K}$  (**5**, 100.3 mg, 0.0880 mmol) in THF (0.8 mL) at  $-70$  °C. After the deep red-black mixture was stirred for 40 min at  $-70$  °C, a solution of 18-crown-6 (93.0 mg, 0.352 mmol) in THF (0.5 mL) was added. (Cooling in the cold well causes precipitation of crown ether from the solution of 18-crown-6 in THF, so it was briefly warmed until it dissolved before adding.) The mixture was stirred for 1 min at  $-70$  °C, and then filtered cold (short plug of Celite in a pipette, additional 0.4 mL of cold THF were used for washing the vial and the plug) to a cold 20 mL vial. The resulting dark red-black solution was left undisturbed in a freezer at  $-38$  °C for 23 h, during which time dark crystals precipitated. A small glass frit filter was cooled at  $-70$  °C in the cold well, and the vial was quickly removed from the freezer and filtered. The solution was pushed through the filter with cold nitrogen using a cooled syringe. Cold THF ( $3 \times 0.5$  mL) and cold butane ( $3 \times 0.5$  mL) were used for washing the vial and the solid. The solid was then dried by passing cold nitrogen (*ca.* 45 mL) through the filter using the cold syringe. The product was then transferred to a cold vial, and further dried cold by applying vacuum in periods of 20 seconds (5 times). The product was obtained as a dark brown solid, 131 mg (balanced cold and loosely capped), which contained 6% butane by NMR, yield 82%. IR spectra were recorded immediately by using the cold sample, which showed an IR spectrum as above, with  $\nu_{\text{NN}} = 1872$   $\text{cm}^{-1}$ . The sample for Mössbauer analysis was transferred in the cold well to a cold plastic cup holder. Zero-field Mössbauer (80 K):  $\delta = 0.74$  mm/s,  $|\Delta E_Q| = 1.79$  mm/s.

*Relative quantification of ligand, crown ether and iron:* A separate sample was transferred to a cold 1 mL vial capped with a septum, taken cold out of the glovebox and treated with a degassed 5:1 mixture of toluene- $d_8$  and acetic acid- $d_4$  (0.5 mL), which had been precooled at  $-40$  °C. The initial yellow brown mixture turned to a colorless solution upon warming to room temperature. The solution was

immediately transferred to an NMR tube, and the vial was washed with an additional 0.3 mL of the solvent. Upon mixing with air in the NMR tube, the colorless solution turned light brown-pink and a brown-pink precipitate separates after few minutes. The NMR tube was left at RT overnight for precipitate to settle, and then was analyzed by  $^1\text{H}$  NMR. An internal standard of  $\text{Ph}_3\text{CH}$  (18.3 mg) was added in toluene- $d_8$  (0.4 mL), the mixture was shaken, the precipitate was allowed to settle, and then the sample was analyzed by  $^1\text{H}$  NMR. The relative concentrations of ligand and 18-crown-6 were determined by comparison of the integration of  $^1\text{H}$  signals of the signals for the *CH* protons of  $^i\text{Pr}$  groups in the ligand, the 18-crown-6, and added  $\text{Ph}_3\text{CH}$ . The solution from NMR tube was transferred to a 20 mL vial, and the tube was washed with acetone. The sample in the vial was concentrated under reduced pressure at 40 °C. The residues in the vial and the NMR tube were dissolved in a total of 6 mL of 3 M  $\text{HCl(aq)}$ , the solutions combined and diluted to 50 mL with water. The amount of Fe was quantified by colorimetric assay using phenanthroline according to the literature<sup>35</sup>. The ratio of **L**/Fe/18-crown-6 was measured as 1:0.88:2.16.

**Procedure C ( $^{14}\text{N}_2/^{15}\text{N}_2$  exchange):** **3** was synthesized according to procedure A at 1/2 of the scale given above. Most of the reaction mixture after filtration was placed in a cold Schlenk tube. (The rest of the reaction mixture was left in a vial at -38 °C for 27 h, handled as described in procedure D below, and the crystals gave the same unit cell as described below.) After 25 h at -38 °C, the Schlenk tube was placed in the cold well at -70 °C, and the mother liquor was removed from the precipitate with a cold pipette, and the product was washed with cold THF (2 × 0.5 mL) and cold butane (2 × 0.5 mL). The product was briefly (30 sec) dried under vacuum at -70 °C until excess of butane solvent cannot be observed anymore, and a sample was immediately analyzed by IR spectroscopy, showing  $\nu_{\text{NN}} = 1873 \text{ cm}^{-1}$ . The rest of the product was kept at -70 °C, cold butane (0.1 mL) was added, and the Schlenk tube was exposed to vacuum at -70 °C until excess of butane solvent cannot be observed anymore (1-2 min),

refilled with  $^{15}\text{N}_2$  gas (1 atm), and left in the cold well for 2 h. The sample was then quickly analyzed by IR, showing  $\nu_{\text{NN}}$  bands at 1875, 1813  $\text{cm}^{-1}$ .

**Procedure D (from LFeK):** A cold suspension of  $\text{KC}_8$  (6.9 mg, 0.051 mmol, 1.0 equiv) in THF (0.2 mL) was added to a stirred cold solution of LFeK (42 mg, 0.051 mmol, crude product obtained by filtering and concentrating the reaction mixture as described above) in THF (0.3 mL) at  $-70\text{ }^\circ\text{C}$ . The resulting deep red-black mixture was stirred for 25 min at  $-70\text{ }^\circ\text{C}$ , then 1/3 of the mixture was filtered cold (short plug of Celite in a pipette), and kept in the cold well for several days after which a fine precipitate separated. To the mixture a cold solution of 18-crown-6 (5 mg, 0.02 mmol) in THF (0.05 mL) was added. The mixture was filtered cold (short plug of Celite in a pipette). The resulting dark red-black solution was left in the cold well for 1 day, and then kept in the freezer ( $-38\text{ }^\circ\text{C}$ ). After a few hours, dark crystals started to form. The crystals were taken into cold Fomblin Y oil in the cold well ( $-70\text{ }^\circ\text{C}$ ) and transported cold ( $-78\text{ }^\circ\text{C}$ ) in a closed jar. A suitable crystal was selected under microscope while keeping the sample under cold nitrogen stream ( $< -80\text{ }^\circ\text{C}$ ). A pin with the crystal was immediately placed on liquid  $\text{N}_2$  cryo-tongs, transported on dry ice, and the crystal was placed on the goniometer under a cold  $\text{N}_2$  stream.

**Procedure E (crystals washed only with THF):** **3** was synthesized according to Procedure A at 1/2 of the scale given above, and crystals were washed only with cold THF. The sample was then quickly analyzed by IR, showing  $\nu_{\text{NN}}$  band at 1880  $\text{cm}^{-1}$ .

## Supplementary References

- 31 Andersen, R. A. *et al.* Synthesis of bis[bis(trimethylsilyl)amido]iron(II). Structure and bonding in  $M[N(\text{SiMe}_3)_2]_2$  ( $M = \text{Mn, Fe, Co}$ ): two-coordinate transition-metal amides. *Inorg. Chem.* **27**, 1782-1786 (1988).
- 32 Olmstead, M. M., Power, P. P. & Shoner, S. C. Three-coordinate iron complexes: X-ray structural characterization of the amide-bridged dimers  $[\text{Fe}(\text{NR}_2)_2]_2$  ( $R = \text{SiMe}_3, \text{C}_6\text{H}_5$ ) and the adduct  $\text{Fe}\{\text{N}(\text{SiMe}_3)_2\}_2(\text{THF})$  and determination of the association energy of the monomer  $\text{Fe}\{\text{N}(\text{SiMe}_3)_2\}_2$  in solution. *Inorg. Chem.* **30**, 2547-2551 (1991).
- 33 Schubert, E. M. Utilizing the Evans method with a superconducting NMR spectrometer in the undergraduate laboratory. *J. Chem. Educ.* **69**, 62 (1992).
- 34 Stoll, S. & Schweiger, A. EasySpin, a comprehensive software package for spectral simulation and analysis in EPR. *J. Magn. Reson.* **178**, 42-55 (2006).
- 35 Braunschweig, J., Bosch, J., Heister, K., Kuebeck, C. & Meckenstock, R. U. Reevaluation of colorimetric iron determination methods commonly used in geomicrobiology. *J. Microbiol. Methods* **89**, 41-48 (2012).
- 36 Bain, G. A. & Berry, J. F. Diamagnetic corrections and Pascal's constants. *J. Chem. Educ.* **85**, 532 (2008).
- 37 O'Connor, C. J. Magnetochemistry—Advances in theory and experimentation. *Prog. Inorg. Chem.* **29**, 203-283 (1982).
- 38 Weast, R. C. & Astle, M. J. *CRC Handbook of Chemistry and Physics*. (CRC Press Inc., Boca Raton, 1979).
- 39 Lebedev, V. I. & Laikov, D. N. A quadrature formula for the sphere of the 131st algebraic order of accuracy. *Doklady Math.* **59**, 477-481 (1999).
- 40 A Fortran code to generate Lebedev grids up to order  $L=131$  is available at <http://server.ccl.net/cca/software/SOURCES/>.
- 41 Neese, F. The ORCA program system. *Wiley Interdiscip. Rev. Comput. Mol. Sci.* **2**, 73-78 (2012).
- 42 Becke, A. D. Density functional calculations of molecular bond energies. *J. Chem. Phys.* **84**, 4524-4529 (1986).
- 43 Perdew, J. P. Density-functional approximation for the correlation energy of the inhomogeneous electron gas. *Phys. Rev. B* **33**, 8822-8824 (1986).
- 44 Grimme, S., Ehrlich, S. & Goerigk, L. Effect of the damping function in dispersion corrected density functional theory. *J. Comput. Chem.* **32**, 1456-1465 (2011).
- 45 Grimme, S., Antony, J., Ehrlich, S. & Krieg, H. A consistent and accurate ab initio parametrization of density functional dispersion correction (DFT-D) for the 94 elements H-Pu. *J. Chem. Phys.* **132**, 154104 (2010).
- 46 van Wüllen, C. Molecular density functional calculations in the regular relativistic approximation: Method, application to coinage metal diatomics, hydrides, fluorides and chlorides, and comparison with first-order relativistic calculations. *J. Chem. Phys.* **109**, 392-399 (1998).
- 47 Pantazis, D. A., Chen, X.-Y., Landis, C. R. & Neese, F. All-Electron Scalar Relativistic Basis Sets for Third-Row Transition Metal Atoms. *J. Chem. Theory Comput.* **4**, 908-919 (2008).

- 48 Weigend, F. & Ahlrichs, R. Balanced basis sets of split valence, triple zeta valence and quadruple zeta valence quality for H to Rn: Design and assessment of accuracy. *Phys. Chem. Chem. Phys.* **7**, 3297-3305 (2005).
- 49 Smallwood, I. M. in *Handbook of Organic Solvent Properties* (ed Ian M. Smallwood) 217-219 (Butterworth-Heinemann, 1996).
- 50 Sheldrick, G. M. A short history of SHELX. *Acta Cryst.* **A64**, 112–122 (2008).
- 51 van der Sluis, P. & Spek, A. L. BYPASS: an effective method for the refinement of crystal structures containing disordered solvent regions. *Acta Cryst.* **A46**, 194-201 (1990).

## Supplementary Data

### Magnetic Susceptibility Measurements

**Magnetic Susceptibility.** Magnetic susceptibility data were measured from a solid sample of **3** in the temperature range 2 - 270 K by using a SQUID susceptometer with a field of 1.0 T (MPMS-7, Quantum Design, calibrated with standard palladium reference sample, error <2%). Variable-temperature magnetization measurements were done at 1 T, 4 T, and 7 T in the range 2-260 K with the magnetization equidistantly sampled on a 1/T temperature scale. The sample was contained in sealed borosilicate NMR tubes, and quartz wool was packed above the sample to constrain it. The SQUID response curves (raw data) were corrected for holder and solvent contributions by subtracting the corresponding response curves obtained from an identical NMR tube without sample. The experimental magnetization data obtained from independent simulation of the corrected SQUID response curves were corrected for underlying diamagnetism<sup>36</sup> by use of tabulated Pascal's constants<sup>37,38</sup>, as well as for temperature-independent paramagnetism. Handling and simulation of the SQUID raw data as well as spin-Hamiltonian simulation of the susceptibility and magnetization data were done with our own package julX for exchange-coupled systems (available from E.B. by mail to ebill@gwdg.de). The simulations are based on the usual spin-Hamilton operator for monomeric compounds with zero-field splitting:

$$\hat{H}_S = D [\hat{S}_z^2 - \frac{1}{3}S(S+1)] + \frac{E}{D} (\hat{S}_x^2 - \hat{S}_y^2) + \mu_B \vec{B} \cdot g \cdot \hat{S}$$

where  $g_{av}$  is the average electronic  $g$  value and  $D$  and  $E/D$  are the axial zero-field splitting and rhombicity parameters.

Diagonalization of the total Hamiltonian was performed with the routine ZHEEV from the LAPACK Library (available from E. B.), and magnetic moments were calculated from the eigenfunctions by using the Hellman-Feynman theorem:

$$\vec{\mu}_i(\vec{B}) = -\langle \psi_i | d\hat{H}/d\vec{B} | \psi_i \rangle$$

The powder summations were done by using a 16-point Lebedev grid<sup>39,40</sup>.

The following figure shows the susceptibility data, with lines representing simulations with  $S = 1$ ,  $\mathbf{g} = [2.004, 2.004, 2.004]$ ,  $D = -7.37 \text{ cm}^{-1}$ ,  $E/D = 0.177$ ,  $\text{TIP} = 100 \times 10^{-6} \text{ emu}$ .

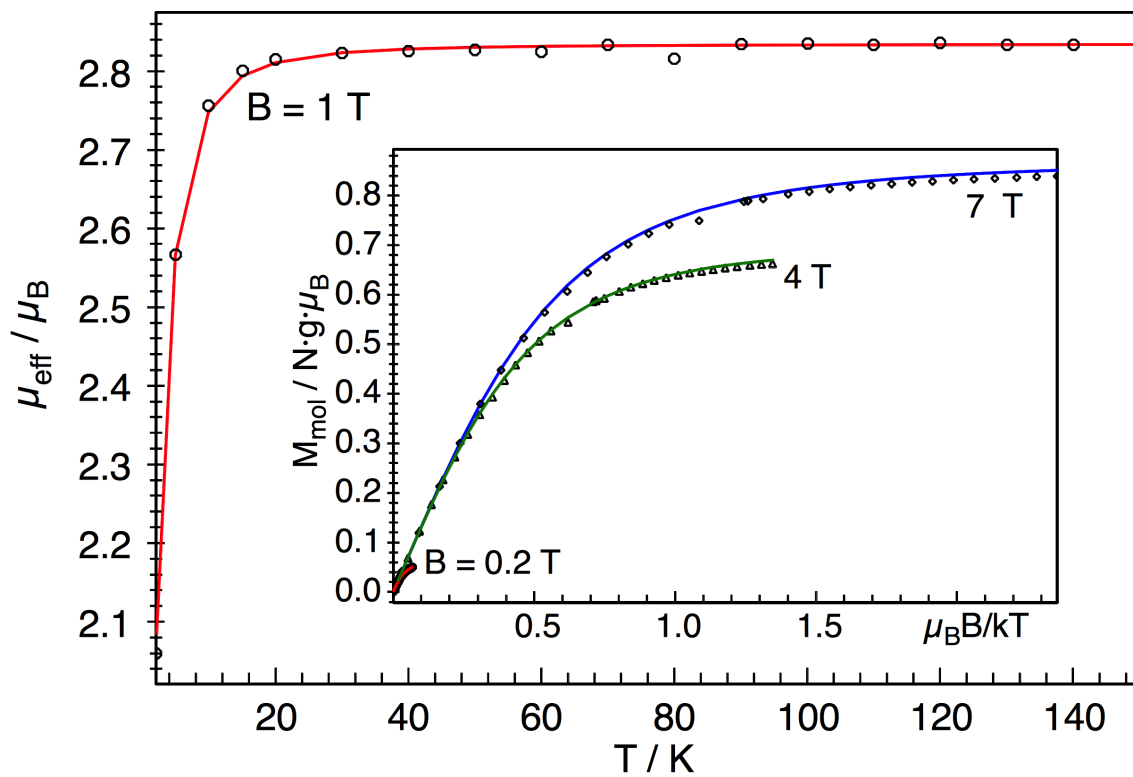

The following is an error scan for  $D$  and  $E/D$ , which shows that a fit to the data with  $D = +5.5 \text{ cm}^{-1}$  would also be acceptable, but is not as good of a global fit as the one with negative  $D$  given above. Future studies will use variable-field Mössbauer spectroscopy to evaluate this compound's magnetic properties in more detail.

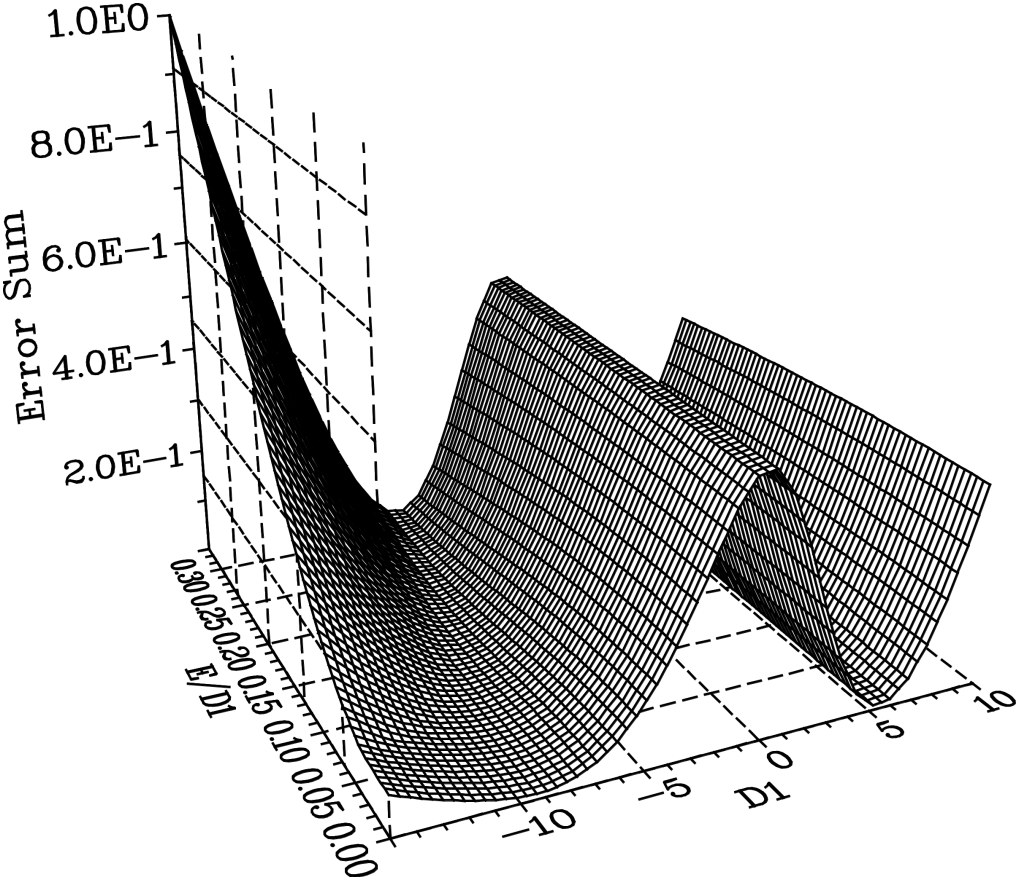



## DFT Calculations

DFT calculations were performed with the ORCA program package, version 3.0.3<sup>41</sup>, using the BP86 functional<sup>42,43</sup>, atom-pairwise dispersion correction with the Becke-Johnson damping scheme (D3BJ)<sup>44,45</sup>, the scalar relativistic zero-order regular approximation (ZORA)<sup>46</sup>, and the scalar relativistically recontracted version of the def2-TZVP basis set<sup>47,48</sup>. The SCF calculations were tightly converged (TightSCF) with unrestricted spin (UKS). Numerical integrations during all DFT calculations were done on a dense grid (ORCA grid4). Initial geometry for calculations was taken from the crystal structure, with  $-(\text{Pr})_3\text{C}_6\text{H}_2$  groups being replaced by  $-\text{H}$ . The calculated structures were confirmed to be minima on the potential energy surface by the absence of imaginary frequencies after analytical frequency calculations on the optimized structures.

Calculated structures of truncated dianion of N<sub>2</sub> complex **3** with  $S = 1$  and  $S = 0$  spin states and comparison of selected geometrical parameters with the crystal structure. Thermodynamic parameters are relative values at 298 K.

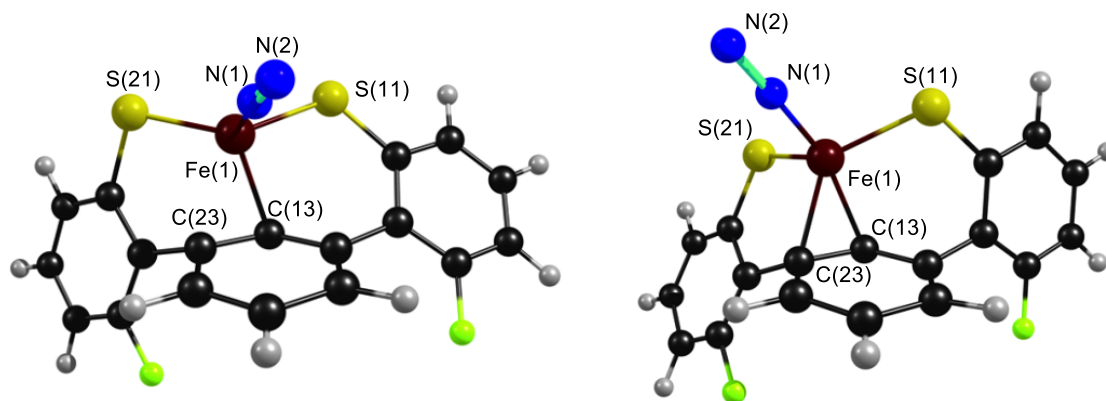

|                  | $S = 1$     | $S = 0$       |
|------------------|-------------|---------------|
| $\Delta G^\circ$ | 0.0 kJ/mol  | 37.4 kJ/mol   |
| $\Delta H^\circ$ | 0.0 kJ/mol  | 31.3 kJ/mol   |
| $\Delta S^\circ$ | 0.0 J/mol•K | -20.5 J/mol•K |

|             | Crystal    | Calculated for $S = 1$ | Calculated for $S = 0$ |
|-------------|------------|------------------------|------------------------|
| Fe(1)-N(1)  | 1.790(5)   | 1.79                   | 1.74                   |
| Fe(1)-C(13) | 2.037(5)   | 2.03                   | 2.04                   |
| Fe(1)-C(23) | 2.239(5)   | 2.17                   | 2.07                   |
| Fe(1)-S(21) | 2.3201(16) | 2.28                   | 2.19                   |
| Fe(1)-S(11) | 2.3549(16) | 2.34                   | 2.22                   |
| N(1)-N(2)   | 1.132(7)   | 1.15                   | 1.15                   |

Sample input used for calculations.

```
!UKS BP86 def2-TZVP D3BJ ZORA NORI TightSCF Grid4 NoFinalGrid SlowConv TightOpt
!Opt
```

```
*xyz -2 3
(atomic coordinates)
*
```

Atomic coordinates for optimized structure of truncated dianion of N<sub>2</sub> complex **3** with  $S = 1$ .

|    |                   |                   |                   |
|----|-------------------|-------------------|-------------------|
| Fe | 14.07647997292359 | 16.54407867035174 | 16.73237751421186 |
| N  | 14.94969997166823 | 17.33393243471027 | 15.38350153890495 |
| N  | 15.43115334898496 | 17.88736235377869 | 14.50117018287384 |
| S  | 14.04298038237994 | 18.15856775854165 | 18.43053400672441 |
| S  | 14.60067572626798 | 14.40055609302932 | 17.31883471406408 |
| C  | 12.79104670162796 | 19.33883724249792 | 18.14254655898091 |
| C  | 11.86559663649255 | 19.28271822364994 | 17.03333439712176 |
| C  | 10.93708230302679 | 20.32437553276251 | 16.93460762496671 |
| C  | 10.83836271061531 | 21.40103985567990 | 17.81421106209623 |
| H  | 10.06901292405003 | 22.15822613940552 | 17.65991575563917 |
| C  | 11.74631332565430 | 21.44231575639864 | 18.88306185585515 |
| H  | 11.71074739150546 | 22.27208240617768 | 19.59572151057091 |
| C  | 12.69245203515350 | 20.43646650523028 | 19.03817470877713 |
| F  | 10.00715251091914 | 20.29988794614018 | 15.91448826090813 |
| C  | 13.07059982010790 | 13.63270560255454 | 16.97106058680756 |
| C  | 12.09434822391206 | 14.33241514032715 | 16.19409844861718 |
| C  | 10.91629105893848 | 13.64283554574104 | 15.89717027251646 |
| C  | 10.63088273548793 | 12.34110902524866 | 16.31319668831677 |
| H  | 9.67515596510180  | 11.88592275511152 | 16.05030398565281 |
| C  | 11.59625796932222 | 11.68144669543078 | 17.08988691044048 |
| H  | 11.40590494311087 | 10.66167374700294 | 17.43895390491809 |
| C  | 12.78916526707697 | 12.31812881682459 | 17.41733317944821 |
| F  | 9.93442975687936  | 14.27438107401197 | 15.16799439309879 |
| C  | 12.07279767733090 | 16.84416316349357 | 16.60724012992446 |
| H  | 11.69213592069122 | 16.64250159621534 | 17.61226610649897 |
| C  | 12.33725449138546 | 15.72763233498731 | 15.71792463689876 |
| C  | 12.26781675091310 | 15.99127932589935 | 14.30395207487483 |
| H  | 12.41438214694739 | 15.15208752418811 | 13.61878428479966 |
| C  | 12.04499484883263 | 17.26060404601595 | 13.81111786869475 |
| H  | 12.04485012982871 | 17.43070460958877 | 12.73104255778883 |
| C  | 11.88469636848496 | 18.36333632427781 | 14.68931808131161 |
| H  | 11.81657157413607 | 19.37606790042610 | 14.29093678386144 |
| C  | 11.91166883375991 | 18.16812184698769 | 16.06644463909547 |
| H  | 13.54612365385476 | 11.80687944451785 | 18.01642039673026 |
| H  | 13.40628892262756 | 20.47592456279462 | 19.86390937800939 |

Atomic coordinates for optimized structure of truncated dianion of N<sub>2</sub> complex **3** with  $S = 0$ .

|    |                   |                   |                   |
|----|-------------------|-------------------|-------------------|
| Fe | 14.02697474097535 | 16.69612967928490 | 16.60490810856594 |
| N  | 15.54194882751229 | 16.35998137739580 | 15.80932764232482 |
| N  | 16.49570834229515 | 16.14685213441541 | 15.20381892399219 |
| S  | 14.40236195793358 | 18.83730402434047 | 17.04739911358885 |
| S  | 14.09568748138308 | 14.88760626031974 | 17.83547119042067 |
| C  | 12.92973303370751 | 19.64937135951196 | 17.58681910906609 |
| C  | 11.65713885264508 | 19.31609936432115 | 17.02272441062582 |
| C  | 10.54812853819811 | 20.03850967993375 | 17.44129655469710 |
| C  | 10.59796290337013 | 21.07304180896409 | 18.38199978400034 |
| H  | 9.68376229260644  | 21.59640156339623 | 18.66451882251024 |
| C  | 11.84735659583392 | 21.38435294085269 | 18.93295696970836 |
| H  | 11.92452771087240 | 22.18604068761683 | 19.67403721328692 |
| C  | 12.99148247505613 | 20.68749445289388 | 18.54472775397131 |
| F  | 9.30954274822441  | 19.73945991732739 | 16.91387686028335 |
| C  | 12.80568090511140 | 13.89832610104384 | 17.20166402657060 |
| C  | 12.09623250611983 | 14.43789416110167 | 16.08717567564259 |
| C  | 11.12375071062181 | 13.61802225338781 | 15.51638216434744 |
| C  | 10.80703822552303 | 12.33334761380084 | 15.97097979676770 |
| H  | 10.02584016985500 | 11.76145896222712 | 15.46815471507631 |
| C  | 11.50006105985473 | 11.84221540884771 | 17.08837758188961 |
| H  | 11.27428094648076 | 10.84041096645209 | 17.46820604212835 |
| C  | 12.47956727017669 | 12.61888702744760 | 17.70308103957730 |
| F  | 10.37611841446222 | 14.07833953918527 | 14.45161512066778 |
| C  | 12.00133773275870 | 16.91953854385544 | 16.57495321935128 |
| H  | 11.61850177251940 | 16.67479994244713 | 17.57247112438910 |
| C  | 12.39310547613345 | 15.84179916615919 | 15.66213352687726 |
| C  | 12.37454125844948 | 16.16541388820828 | 14.24666706271433 |
| H  | 12.66333890184318 | 15.37870369011924 | 13.54459291533775 |
| C  | 11.97358639668672 | 17.39150074756468 | 13.77641155538271 |
| H  | 11.99392083769857 | 17.59279854937796 | 12.70111124400567 |
| C  | 11.62123295067877 | 18.44678571699190 | 14.68022083870080 |
| H  | 11.46932725160671 | 19.46300689949765 | 14.30941594522012 |
| C  | 11.65619979813537 | 18.21359308652406 | 16.03706229024444 |
| H  | 13.03945154174317 | 12.23317223329027 | 18.55929343778981 |
| H  | 13.96594729992738 | 20.94170688689596 | 18.96798320927686 |

## IR Spectra

IR spectrum of  $\text{LFe}(\text{THF})_2$  (**1**).

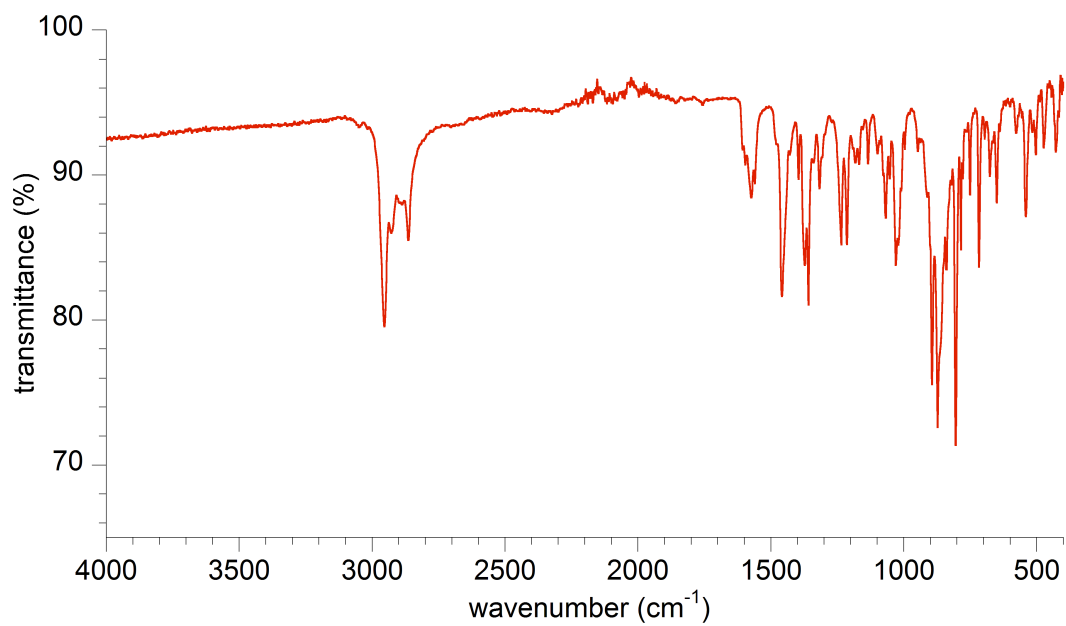

IR spectrum of  $\text{LFeK}$  (**2**).

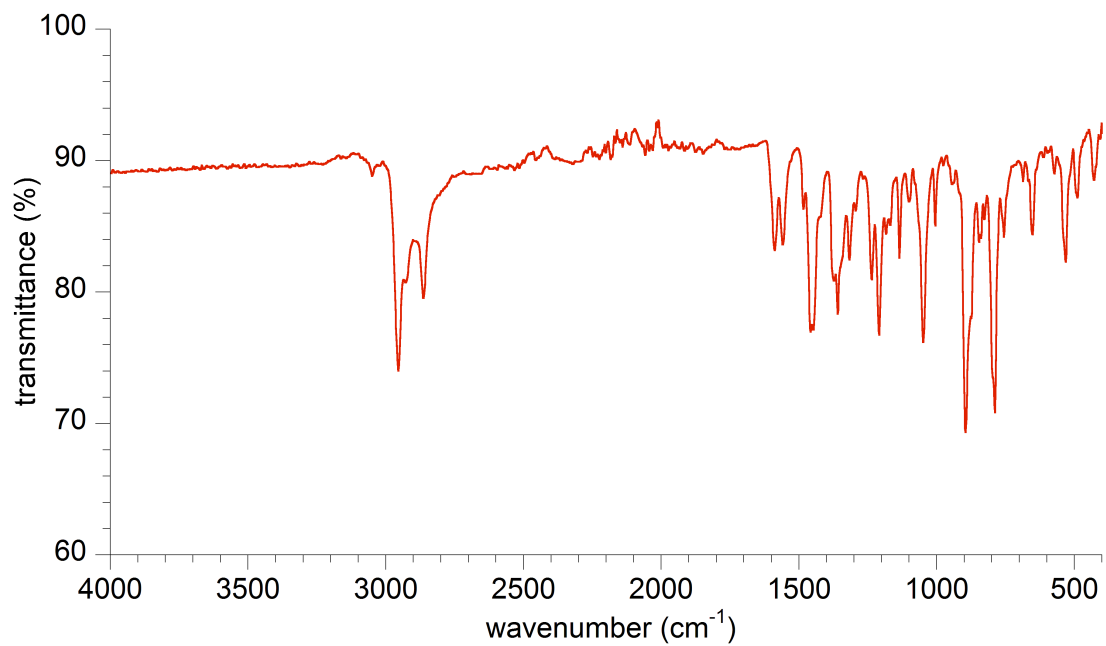

IR spectrum of [LFeSC<sub>6</sub>H<sub>4</sub>Ar]K (**5**).

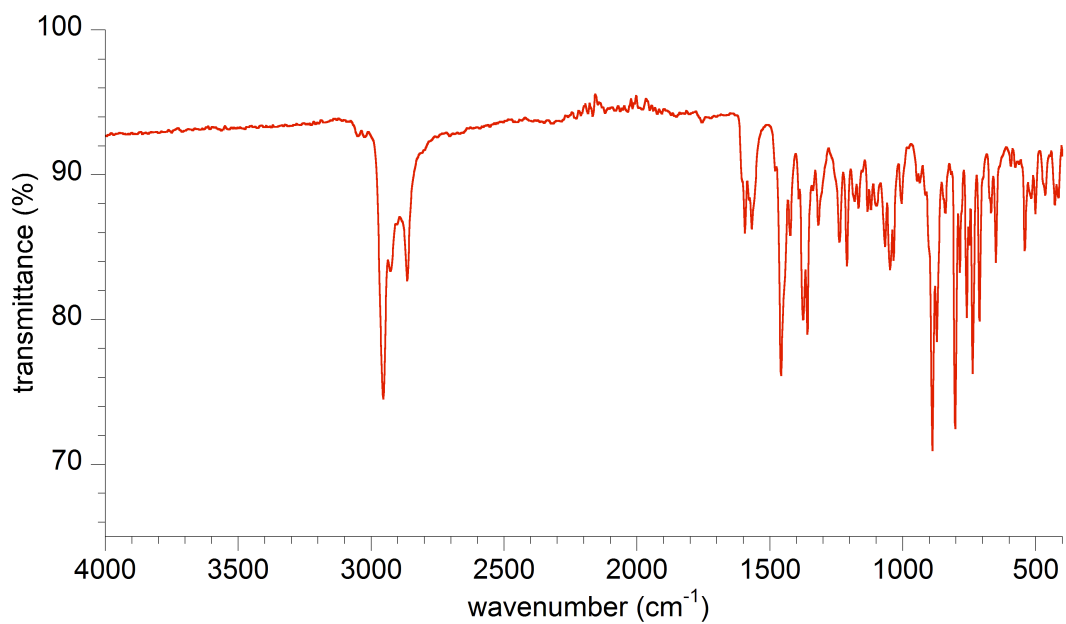

IR spectrum of [LFeN<sub>2</sub>][K(18-crown-6)(THF)<sub>2</sub>]<sub>2</sub> (**3**) (Procedure A).

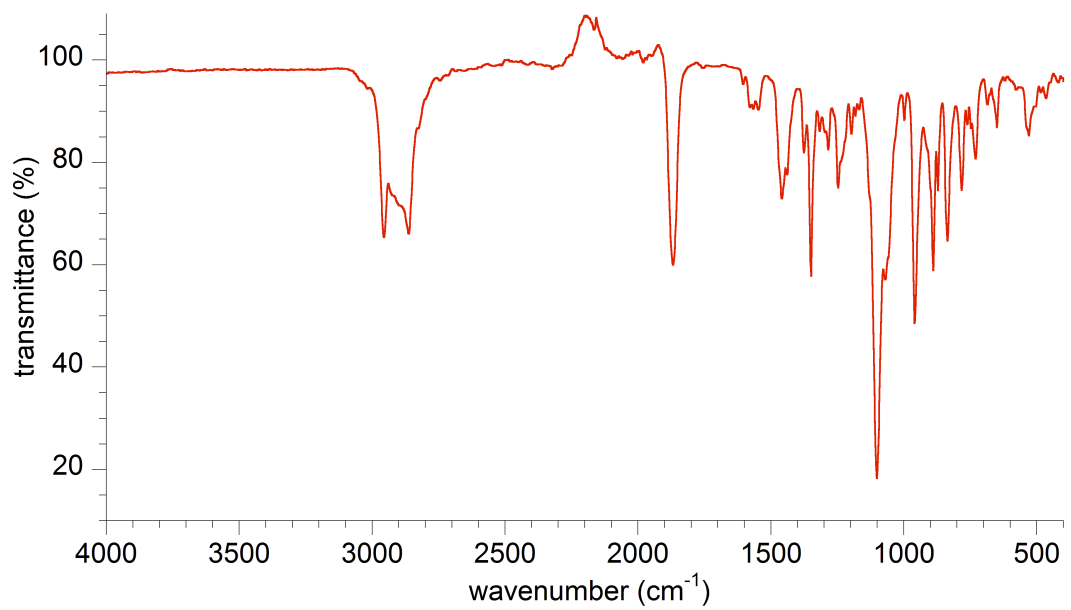

IR spectrum of **3** after exchange of  $^{14}\text{N}_2$  ligand with  $^{15}\text{N}_2$  at  $-70\text{ }^\circ\text{C}$  (Procedure C).

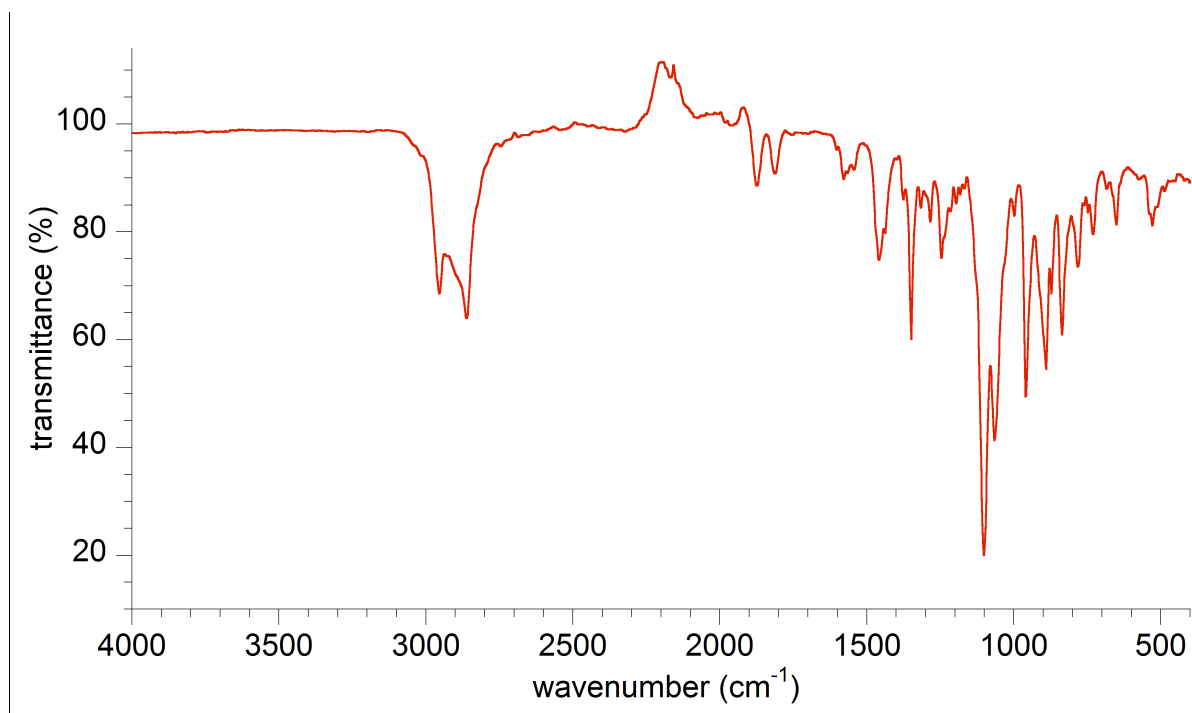

IR spectrum of  $[\text{LFeN}_2][\text{K}(18\text{-crown-6})(\text{THF})_2]_2$  (**3**) (Procedure E).

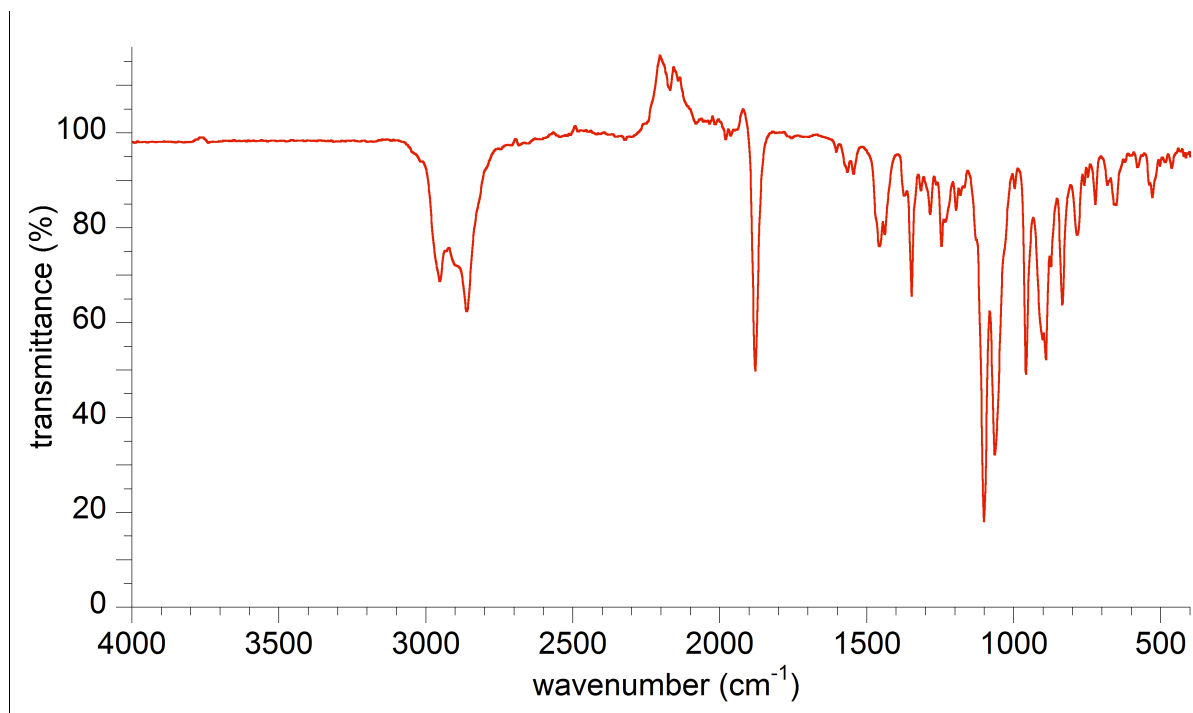

## UV-VIS Spectra

UV-VIS spectrum of  $\text{LFe}(\text{THF})_2$  (**1**) in THF, 1.15 mM, 21 °C, path length 0.1 cm.

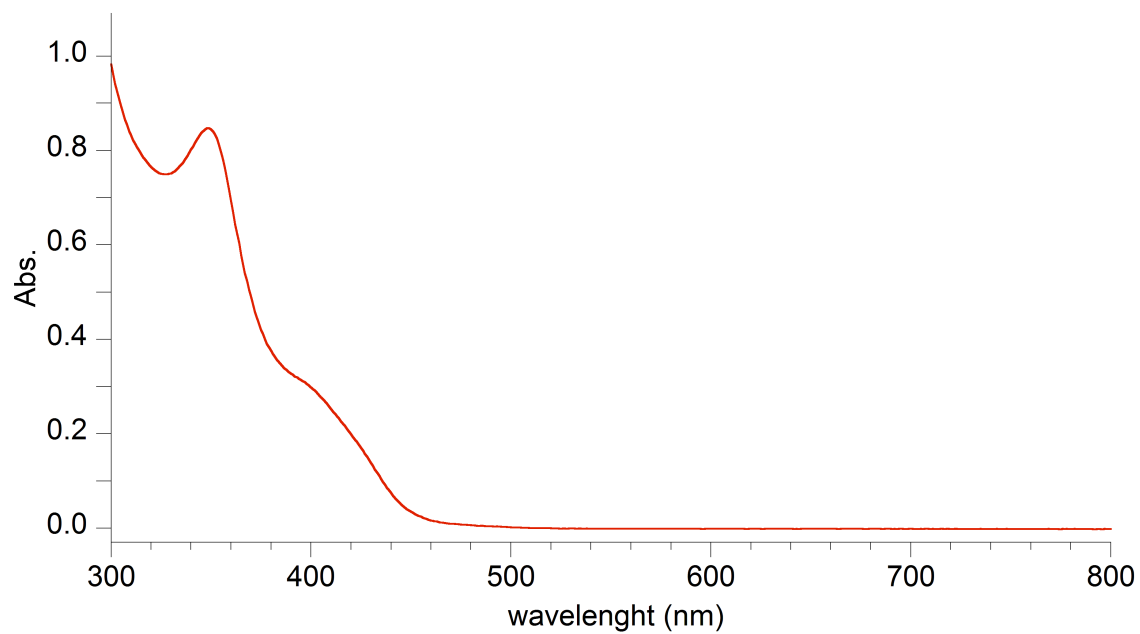

UV-VIS spectrum of  $\text{LFeK}$  (**2**) in THF, 0.48 mM, 21 °C, path length 0.1 cm.

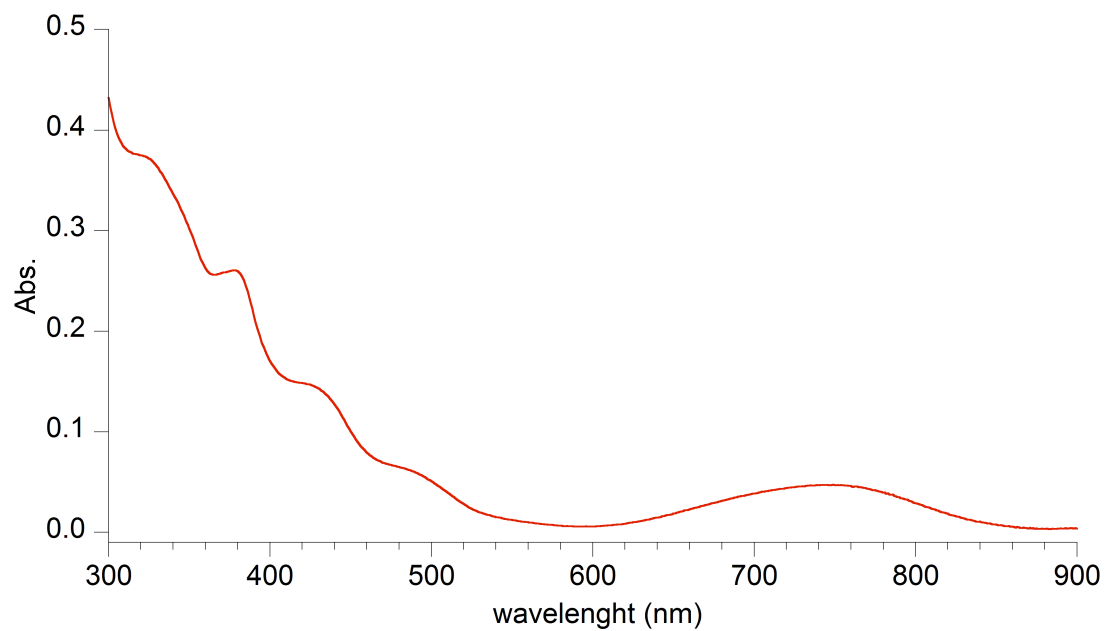



UV-VIS spectrum of [LFeSC<sub>6</sub>H<sub>4</sub>Ar]K (**5**) in THF, 0.73 mM, 21 °C, path length 0.1 cm.

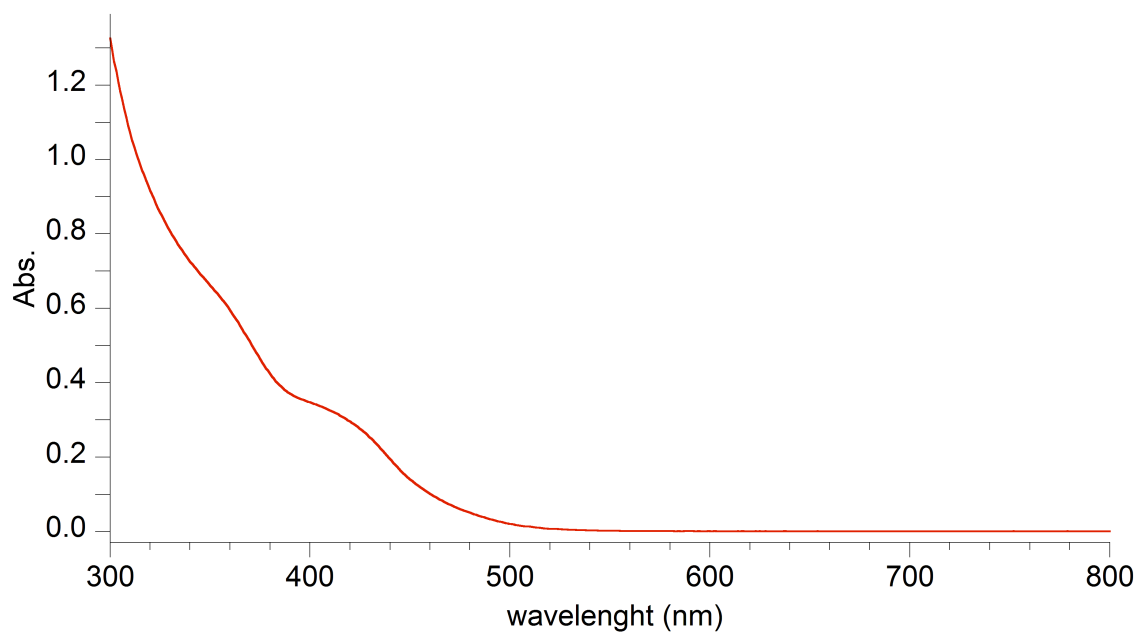

Temperature dependence of UV-VIS spectra of **5/5**·THF in THF. The concentration was corrected for cubic expansion coefficient of THF<sup>49</sup>. These data show the appearance of a new species at lower temperature, which we attribute to the crystallographically characterized compound **5**·THF.

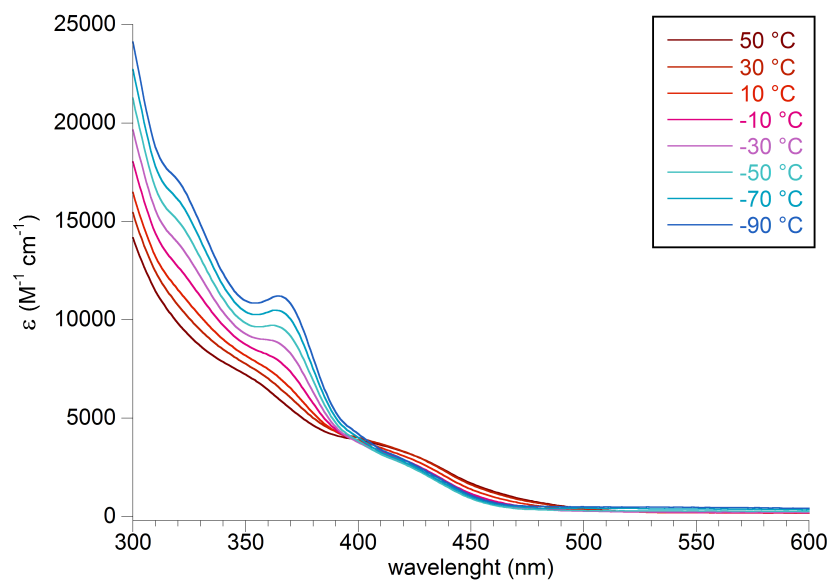

# NMR Spectra

$^1\text{H}$  NMR spectrum of  $\text{LFe}(\text{THF})_2$  (**1**) in  $\text{THF-}d_8$ .

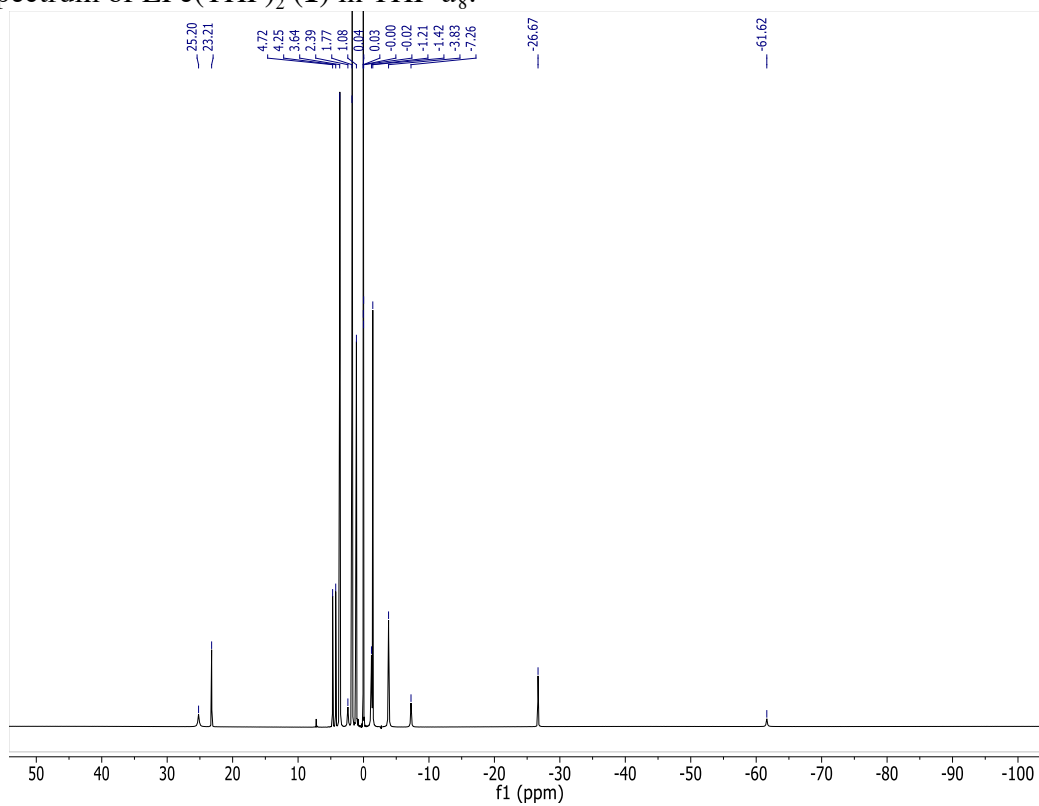

$^1\text{H}$  NMR spectrum of LFeK (**2**) in THF- $d_8$ .

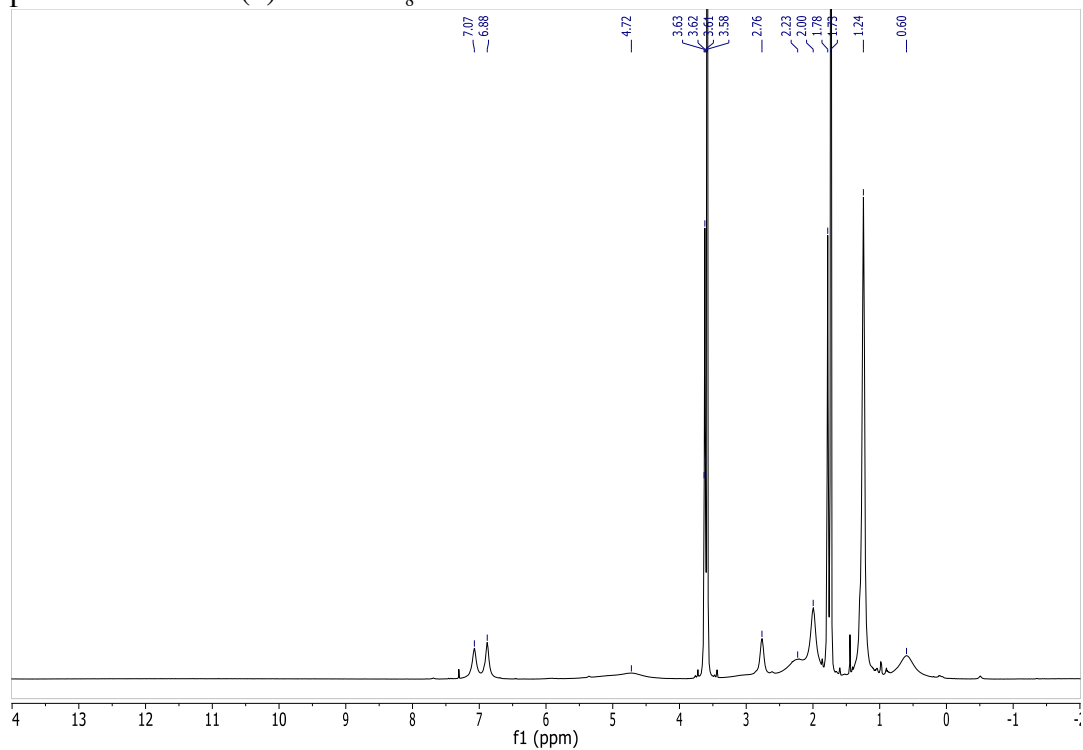

$^1\text{H}$  NMR spectrum of [LFeSC<sub>6</sub>H<sub>4</sub>Ar]K (**5**) in THF- $d_8$ .

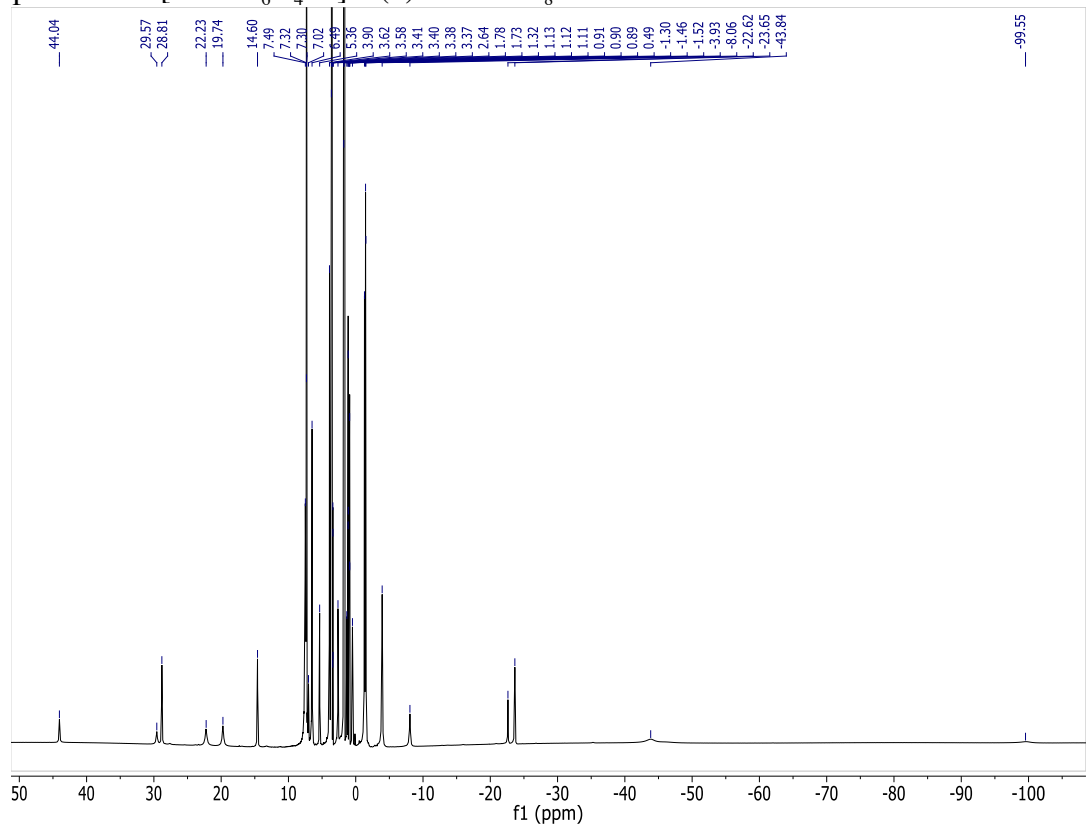

## Mössbauer Spectra

Zero-field Mössbauer spectrum of  $\text{LFe}(\text{THF})_2$  (**1**), recorded at 80 K. The black circles are the data, the red line is a simulation with  $\delta = 0.89$  mm/s and  $|\Delta E_Q| = 3.77$  mm/s, and gray line is the residual.

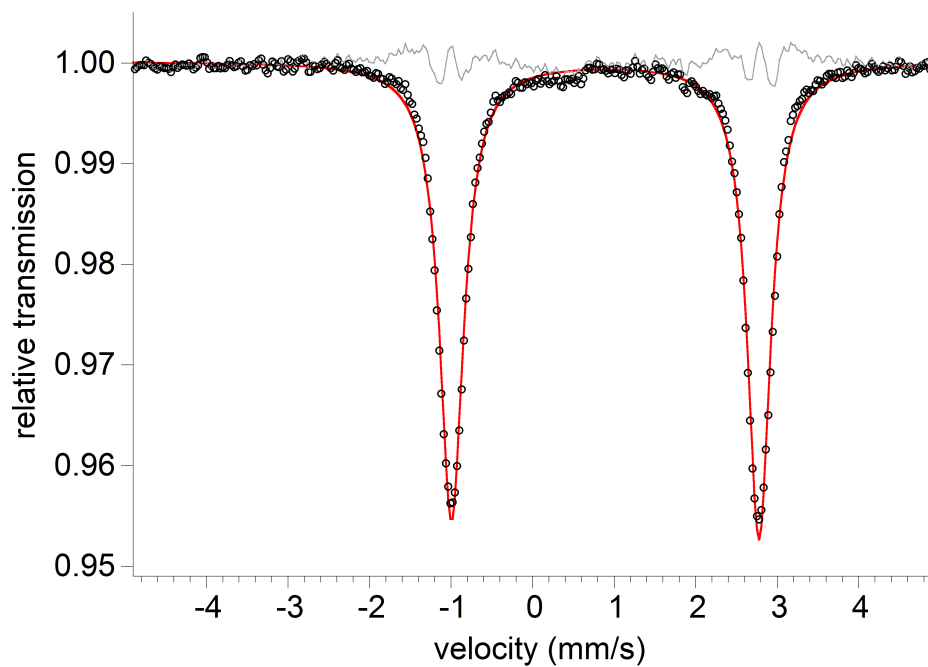

Zero-field Mössbauer spectrum of  $\text{LFeK}$  (**2**), recorded at 80 K. The black circles are the data, the red line is a simulation with  $\delta = 0.59$  mm/s,  $|\Delta E_Q| = 0.53$  mm/s, and gray line is the residual.

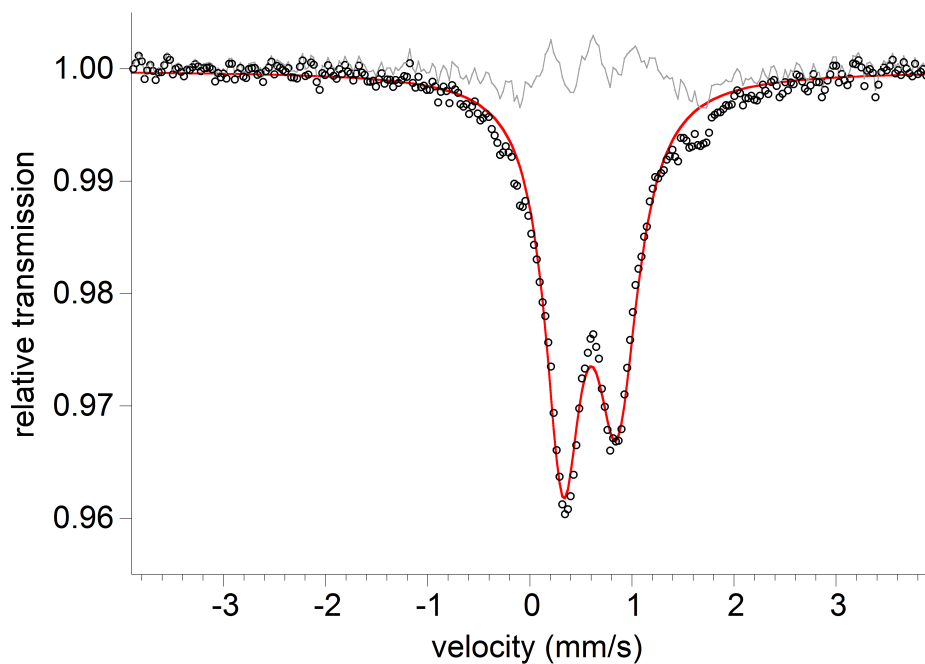

Zero-field Mössbauer spectrum of **3**, recorded at 80 K. The black circles are the data, the red line is a simulation with  $\delta = 0.74$  mm/s,  $|\Delta E_Q| = 1.79$  mm/s, and gray line is the residual.

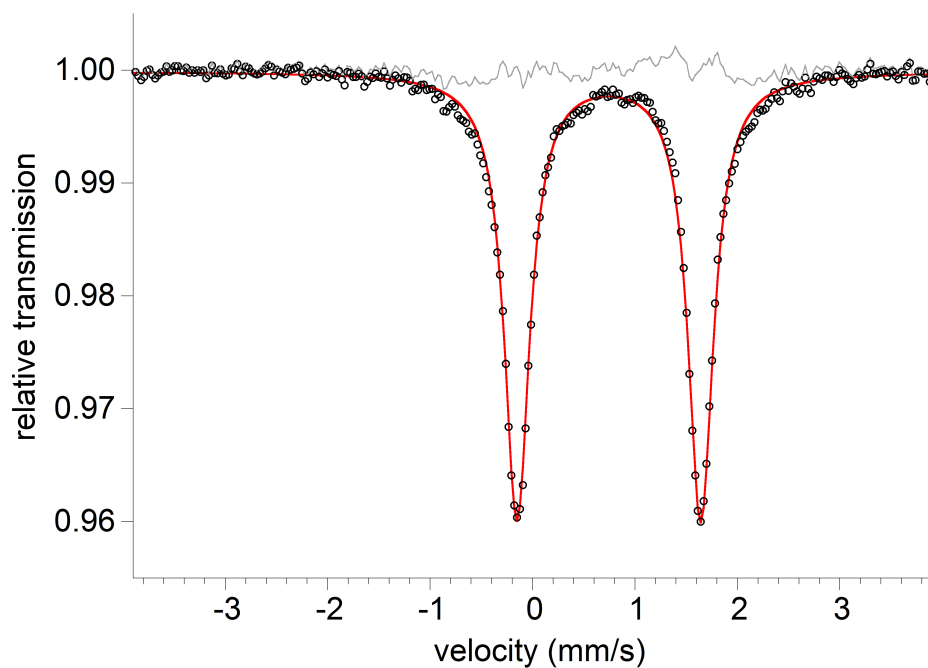

Zero-field Mössbauer spectrum of [LFeSC<sub>6</sub>H<sub>4</sub>Ar]K (**5**), recorded at 80 K. The black circles are the data, the red line is a simulation with  $\delta = 0.69$  mm/s,  $|\Delta E_Q| = 1.50$  mm/s, and gray line is the residual.

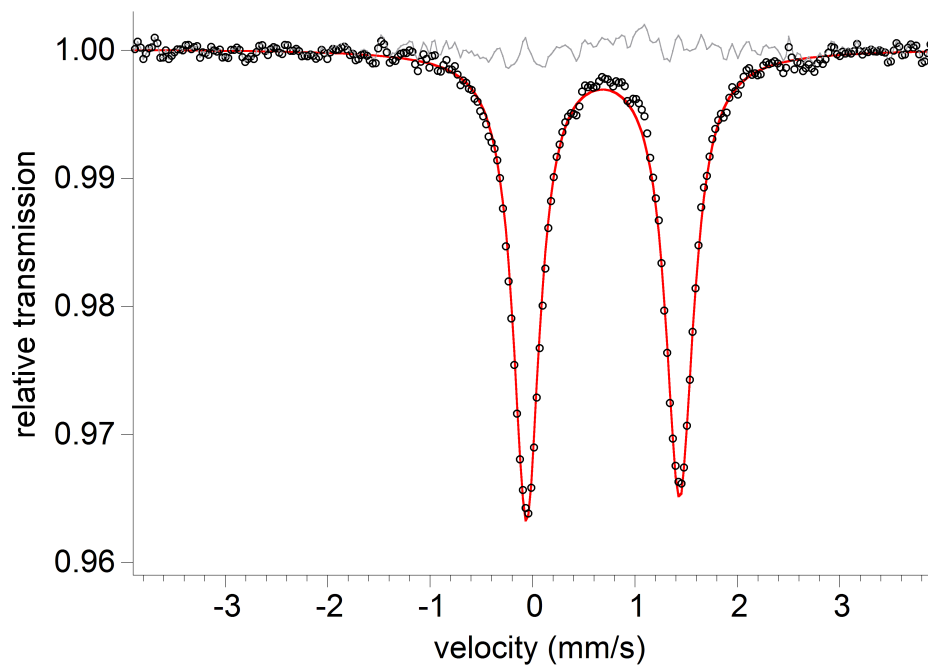

## EPR Spectra

X-band EPR spectrum of LFeK (**2**) in frozen THF solution. Recorded at  $9.4 \pm 0.1$  K. Acquisition parameters: frequency = 9.386 GHz, power = 0.01 mW, conversion time = 41 ms, modulation amplitude = 10 G, modulation frequency = 100 kHz, time constant = 10 ms, sweep time 42 s. The data are shown in black; in red is a simulation with  $\mathbf{g} = [2.180, 2.020, 1.989]$  and H-Strain = [106, 25, 31] MHz.

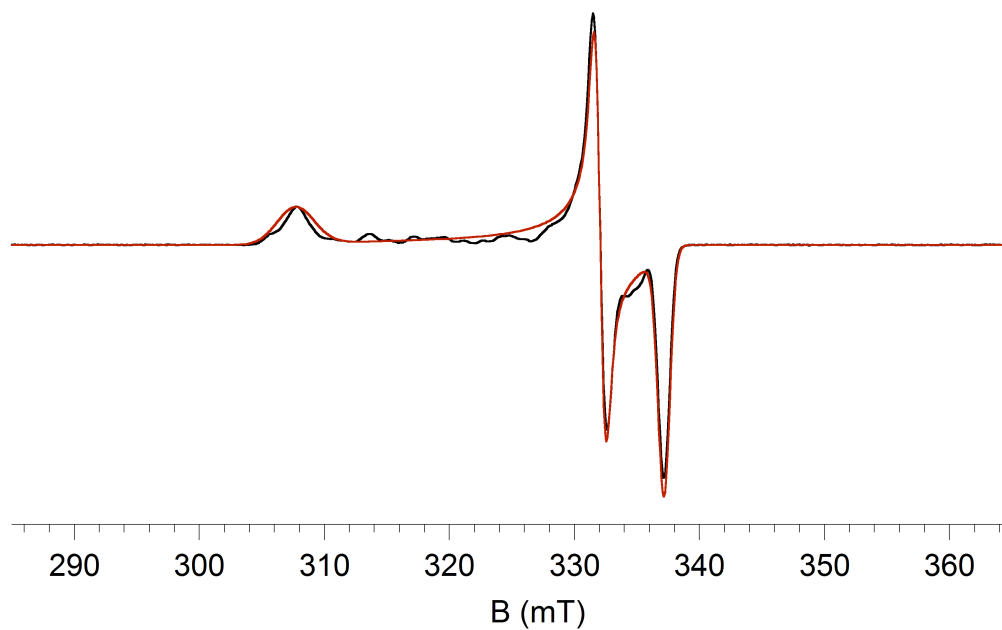

## Crystallographic Data

### *Experimental and Refinement Details for LFe(THF)<sub>2</sub> (1)*

Single crystals for X-ray analysis were obtained by slow cooling of a hot solution of LFe(THF)<sub>2</sub> (1) (33 mg) in THF (0.3 mL). Low-temperature diffraction data ( $\omega$ -scans) were collected on a Rigaku MicroMax-007HF diffractometer coupled to a Saturn994+ CCD detector with Cu K $\alpha$  ( $\lambda = 1.54178 \text{ \AA}$ ). All structures were solved by direct methods and were refined against  $F^2$  on all data by full-matrix least squares<sup>50</sup>. All non-hydrogen atoms were refined anisotropically. Hydrogen atoms were included in the model at geometrically calculated positions and refined using a riding model. The isotropic displacement parameters of all hydrogen atoms were fixed to 1.2 times the U value of the atoms to which they are linked (1.5 times for methyl groups).

The crystal structure reported here contains solvent accessible voids in the unit cell. In spite of numerous attempts, no sensible solvent model could be established, and the solvent is assumed to be disordered within these voids. The crystals had been obtained from THF. The program SQUEEZE was used to compensate for the contribution of disordered solvents contained in voids within the crystal lattice from the diffraction intensities<sup>51</sup>. This procedure was applied to the data file and the submitted model is based on the solvent removed data. Based on the total electron density found in the voids ( $347.7 \text{ e/\AA}^3$ ), it is likely that  $\sim 11$  THF molecules are present in the unit cell. See "\_platon\_squeeze\_details" in the .cif for more information. Reflections  $[-1 \ 4 \ 2]$ ,  $[-3 \ 9 \ 3]$   $[2 \ 1 \ 0]$  and  $[-2 \ 11 \ 2]$  are omitted, due to the close proximity of these reflections to the beam-stop. One isopropyl moiety is disordered over two positions. The site occupancy factors of the two positions were freely refined and converged at the values of 0.55(2) and 0.45(2). The major position involves atoms {C17A, C18A, C19A}; the minor component contains {C17B, C18B, C19B}. A rigid bond restraint was applied to the major and minor disordered sites. The refinement became unstable without rigid bond restraints, which is likely related to the close proximity of the atoms in the disordered model.

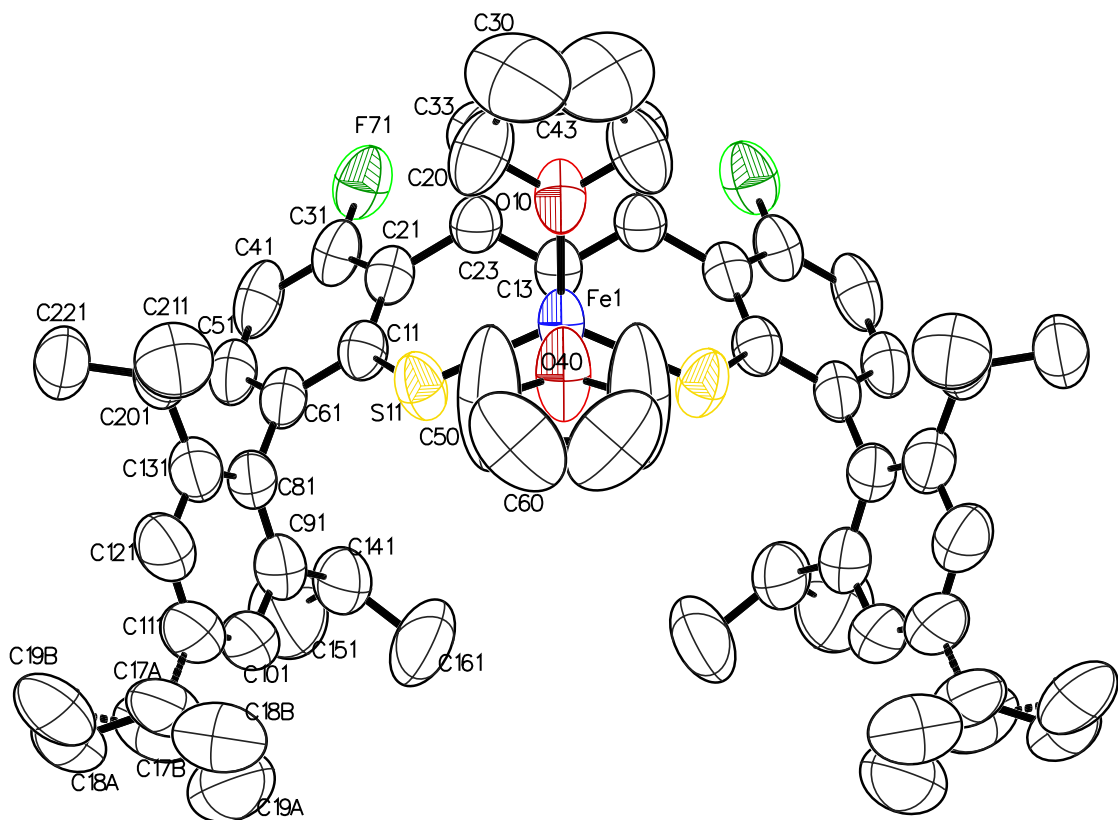

The full numbering scheme of LFe(THF)<sub>2</sub> (**1**), which resides on a crystallographic mirror plane. The symmetry equivalents of the numbered atoms are generated by the operation  $x, \frac{1}{2}-y, z$ . All atoms shown are depicted with 50% thermal contours. The hydrogen atoms have been removed for clarity.



## Crystal data and structure refinement for LFe(THF)<sub>2</sub> (1).

|                                   |                                                                                                                                                           |
|-----------------------------------|-----------------------------------------------------------------------------------------------------------------------------------------------------------|
| Identification code               | 007-14182                                                                                                                                                 |
| Empirical formula                 | C <sub>56</sub> H <sub>70</sub> F <sub>2</sub> FeO <sub>2</sub> S <sub>2</sub>                                                                            |
| Formula weight                    | 933.09                                                                                                                                                    |
| Temperature                       | 193(2) K                                                                                                                                                  |
| Wavelength                        | 1.54187 Å                                                                                                                                                 |
| Crystal system                    | Monoclinic                                                                                                                                                |
| Space group                       | P 2 <sub>1</sub> /m                                                                                                                                       |
| Unit cell dimensions              | a = 8.8407(2) Å                      α = 90°.<br>b = 23.7861(5) Å                      β = 100.433(7)°.<br>c = 17.0387(12) Å                     γ = 90°. |
| Volume                            | 3523.8(3) Å <sup>3</sup>                                                                                                                                  |
| Z                                 | 2                                                                                                                                                         |
| Density (calculated)              | 0.879 g/cm <sup>3</sup>                                                                                                                                   |
| Absorption coefficient            | 2.533 mm <sup>-1</sup>                                                                                                                                    |
| F(000)                            | 996                                                                                                                                                       |
| Crystal size                      | 0.180 x 0.170 x 0.160 mm <sup>3</sup>                                                                                                                     |
| Crystal color and habit           | Yellow needle                                                                                                                                             |
| Diffractometer                    | Rigaku Saturn 944+ CCD                                                                                                                                    |
| Θ range for data collection       | 2.637 to 65.088°.                                                                                                                                         |
| Index ranges                      | -10 <= h <= 9, -27 <= k <= 27, -20 <= l <= 20                                                                                                             |
| Reflections collected             | 93006                                                                                                                                                     |
| Independent reflections           | 6133 [R(int) = 0.2179]                                                                                                                                    |
| Observed reflections (I > 2σ(I))  | 3452                                                                                                                                                      |
| Completeness to theta = 65.088°   | 99.5 %                                                                                                                                                    |
| Absorption correction             | Semi-empirical from equivalents                                                                                                                           |
| Max. and min. transmission        | 0.687 and 0.435                                                                                                                                           |
| Solution method                   | SHELXT-2014/5 (Sheldrick, 2014)                                                                                                                           |
| Refinement method                 | SHELXL-2014/7 (Sheldrick, 2014)                                                                                                                           |
| Data / restraints / parameters    | 6133 / 49 / 329                                                                                                                                           |
| Goodness-of-fit on F <sup>2</sup> | 1.027                                                                                                                                                     |
| Final R indices [I > 2σ(I)]       | R1 = 0.0775, wR2 = 0.2307                                                                                                                                 |
| R indices (all data)              | R1 = 0.1138, wR2 = 0.2513                                                                                                                                 |
| Extinction coefficient            | 0.0035(6)                                                                                                                                                 |
| Largest diff. peak and hole       | 0.346 and -0.290 e.Å <sup>-3</sup>                                                                                                                        |

**Atomic coordinates (  $\times 10^4$ ) and equivalent isotropic displacement parameters ( $\text{\AA}^2 \times 10^3$ ) for  $\text{LFe(THF)}_2$  (1). U(eq) is defined as one third of the trace of the orthogonalized  $U^{ij}$  tensor.**

|        | x        | y        | z        | U(eq)   |
|--------|----------|----------|----------|---------|
| Fe(1)  | 5173(1)  | 2500     | 5749(1)  | 69(1)   |
| S(11)  | 4898(1)  | 3371(1)  | 6285(1)  | 86(1)   |
| C(11)  | 3166(5)  | 3719(2)  | 5942(2)  | 66(1)   |
| C(21)  | 2067(5)  | 3544(2)  | 5267(2)  | 66(1)   |
| C(31)  | 791(5)   | 3867(2)  | 5046(3)  | 71(1)   |
| C(41)  | 485(6)   | 4349(2)  | 5436(3)  | 87(1)   |
| C(51)  | 1561(6)  | 4518(2)  | 6091(3)  | 77(1)   |
| C(61)  | 2869(5)  | 4213(2)  | 6342(3)  | 68(1)   |
| F(71)  | -276(3)  | 3698(1)  | 4412(2)  | 93(1)   |
| C(81)  | 3967(6)  | 4415(2)  | 7071(3)  | 76(1)   |
| C(91)  | 3745(7)  | 4247(2)  | 7833(3)  | 94(2)   |
| C(101) | 4711(8)  | 4447(2)  | 8492(3)  | 113(2)  |
| C(111) | 5911(9)  | 4801(3)  | 8431(3)  | 123(2)  |
| C(121) | 6146(7)  | 4968(2)  | 7687(3)  | 107(2)  |
| C(131) | 5176(6)  | 4768(2)  | 6996(3)  | 84(1)   |
| C(141) | 2457(8)  | 3858(2)  | 7939(3)  | 109(2)  |
| C(151) | 1090(10) | 4190(3)  | 8194(5)  | 168(3)  |
| C(161) | 2952(10) | 3367(3)  | 8497(5)  | 162(3)  |
| C(17A) | 7370(30) | 4991(6)  | 9114(9)  | 151(7)  |
| C(18A) | 6990(50) | 5580(8)  | 9386(15) | 165(8)  |
| C(19A) | 7700(30) | 4580(8)  | 9804(12) | 174(8)  |
| C(17B) | 6740(20) | 5042(8)  | 9282(9)  | 133(7)  |
| C(18B) | 8150(20) | 4651(12) | 9390(17) | 156(8)  |
| C(19B) | 6970(60) | 5666(9)  | 9110(20) | 182(12) |
| C(201) | 5439(6)  | 4986(2)  | 6186(3)  | 82(1)   |
| C(211) | 7060(7)  | 4908(3)  | 6071(4)  | 124(2)  |
| C(221) | 4897(8)  | 5590(2)  | 6047(4)  | 115(2)  |
| C(13)  | 2230(6)  | 2500     | 5231(4)  | 62(1)   |
| C(23)  | 2217(5)  | 3009(2)  | 4830(3)  | 66(1)   |
| C(33)  | 2180(5)  | 3004(2)  | 4025(3)  | 79(1)   |
| C(43)  | 2200(8)  | 2500     | 3607(4)  | 87(2)   |
| O(10)  | 5793(5)  | 2500     | 4657(3)  | 89(1)   |
| C(20)  | 6284(8)  | 2990(2)  | 4271(4)  | 128(2)  |
| C(30)  | 7034(12) | 2762(4)  | 3637(5)  | 224(5)  |
| O(40)  | 7577(5)  | 2500     | 6242(4)  | 116(2)  |
| C(50)  | 8533(8)  | 2963(3)  | 6460(8)  | 233(6)  |
| C(60)  | 9910(8)  | 2796(3)  | 6865(5)  | 178(3)  |

**Bond lengths [ $\text{\AA}$ ] and angles [ $^\circ$ ] for  $\text{LFe(THF)}_2$  (1).**

|               |            |
|---------------|------------|
| Fe(1)-O(10)   | 2.032(5)   |
| Fe(1)-O(40)   | 2.139(5)   |
| Fe(1)-S(11)   | 2.2937(11) |
| Fe(1)-S(11)#1 | 2.2937(11) |

|               |           |
|---------------|-----------|
| S(11)-C(11)   | 1.747(4)  |
| C(11)-C(61)   | 1.407(5)  |
| C(11)-C(21)   | 1.426(6)  |
| C(21)-C(31)   | 1.360(5)  |
| C(21)-C(23)   | 1.492(5)  |
| C(31)-F(71)   | 1.359(5)  |
| C(31)-C(41)   | 1.377(6)  |
| C(41)-C(51)   | 1.389(6)  |
| C(41)-H(41)   | 0.9500    |
| C(51)-C(61)   | 1.367(6)  |
| C(51)-H(51)   | 0.9500    |
| C(61)-C(81)   | 1.509(6)  |
| C(81)-C(131)  | 1.384(6)  |
| C(81)-C(91)   | 1.406(6)  |
| C(91)-C(101)  | 1.367(7)  |
| C(91)-C(141)  | 1.503(7)  |
| C(101)-C(111) | 1.373(8)  |
| C(101)-H(101) | 0.9500    |
| C(111)-C(121) | 1.379(8)  |
| C(111)-C(17B) | 1.607(14) |
| C(111)-C(17A) | 1.637(15) |
| C(121)-C(131) | 1.409(7)  |
| C(121)-H(121) | 0.9500    |
| C(131)-C(201) | 1.529(7)  |
| C(141)-C(161) | 1.519(8)  |
| C(141)-C(151) | 1.570(10) |
| C(141)-H(141) | 1.0000    |
| C(151)-H(15A) | 0.9800    |
| C(151)-H(15B) | 0.9800    |
| C(151)-H(15C) | 0.9800    |
| C(161)-H(16A) | 0.9800    |
| C(161)-H(16B) | 0.9800    |
| C(161)-H(16C) | 0.9800    |
| C(17A)-C(19A) | 1.516(16) |
| C(17A)-C(18A) | 1.531(17) |
| C(17A)-H(17A) | 1.0000    |
| C(18A)-H(18A) | 0.9800    |
| C(18A)-H(18B) | 0.9800    |
| C(18A)-H(18C) | 0.9800    |
| C(19A)-H(19A) | 0.9800    |
| C(19A)-H(19B) | 0.9800    |
| C(19A)-H(19C) | 0.9800    |
| C(17B)-C(19B) | 1.533(18) |
| C(17B)-C(18B) | 1.536(16) |
| C(17B)-H(17B) | 1.0000    |
| C(18B)-H(18D) | 0.9800    |
| C(18B)-H(18E) | 0.9800    |
| C(18B)-H(18F) | 0.9800    |
| C(19B)-H(19D) | 0.9800    |
| C(19B)-H(19E) | 0.9800    |
| C(19B)-H(19F) | 0.9800    |
| C(201)-C(211) | 1.493(8)  |
| C(201)-C(221) | 1.522(7)  |
| C(201)-H(201) | 1.0000    |
| C(211)-H(21A) | 0.9800    |
| C(211)-H(21B) | 0.9800    |

|                     |            |
|---------------------|------------|
| C(211)-H(21C)       | 0.9800     |
| C(221)-H(22A)       | 0.9800     |
| C(221)-H(22B)       | 0.9800     |
| C(221)-H(22C)       | 0.9800     |
| C(13)-C(23)#1       | 1.390(5)   |
| C(13)-C(23)         | 1.390(5)   |
| C(13)-H(13)         | 0.9500     |
| C(23)-C(33)         | 1.366(6)   |
| C(33)-C(43)         | 1.396(6)   |
| C(33)-H(33)         | 0.9500     |
| C(43)-C(33)#1       | 1.397(6)   |
| C(43)-H(43)         | 0.9500     |
| O(10)-C(20)#1       | 1.444(5)   |
| O(10)-C(20)         | 1.444(5)   |
| C(20)-C(30)         | 1.470(10)  |
| C(20)-H(20A)        | 0.9900     |
| C(20)-H(20B)        | 0.9900     |
| C(30)-C(30)#1       | 1.247(19)  |
| C(30)-H(30A)        | 0.9900     |
| C(30)-H(30B)        | 0.9900     |
| O(40)-C(50)#1       | 1.396(6)   |
| O(40)-C(50)         | 1.396(6)   |
| C(50)-C(60)         | 1.346(10)  |
| C(50)-H(50A)        | 0.9900     |
| C(50)-H(50B)        | 0.9900     |
| C(60)-C(60)#1       | 1.406(16)  |
| C(60)-H(60A)        | 0.9900     |
| C(60)-H(60B)        | 0.9900     |
| O(10)-Fe(1)-O(40)   | 86.9(2)    |
| O(10)-Fe(1)-S(11)   | 115.45(4)  |
| O(40)-Fe(1)-S(11)   | 90.74(8)   |
| O(10)-Fe(1)-S(11)#1 | 115.45(4)  |
| O(40)-Fe(1)-S(11)#1 | 90.75(8)   |
| S(11)-Fe(1)-S(11)#1 | 129.08(8)  |
| C(11)-S(11)-Fe(1)   | 116.42(15) |
| C(61)-C(11)-C(21)   | 118.4(4)   |
| C(61)-C(11)-S(11)   | 117.6(3)   |
| C(21)-C(11)-S(11)   | 124.0(3)   |
| C(31)-C(21)-C(11)   | 117.9(4)   |
| C(31)-C(21)-C(23)   | 119.2(4)   |
| C(11)-C(21)-C(23)   | 122.8(3)   |
| F(71)-C(31)-C(21)   | 118.4(4)   |
| F(71)-C(31)-C(41)   | 117.4(4)   |
| C(21)-C(31)-C(41)   | 124.2(4)   |
| C(31)-C(41)-C(51)   | 117.6(4)   |
| C(31)-C(41)-H(41)   | 121.2      |
| C(51)-C(41)-H(41)   | 121.2      |
| C(61)-C(51)-C(41)   | 121.1(4)   |
| C(61)-C(51)-H(51)   | 119.5      |
| C(41)-C(51)-H(51)   | 119.5      |
| C(51)-C(61)-C(11)   | 120.8(4)   |
| C(51)-C(61)-C(81)   | 118.1(4)   |
| C(11)-C(61)-C(81)   | 121.1(4)   |
| C(131)-C(81)-C(91)  | 119.9(4)   |
| C(131)-C(81)-C(61)  | 120.6(4)   |

|                      |           |
|----------------------|-----------|
| C(91)-C(81)-C(61)    | 119.5(4)  |
| C(101)-C(91)-C(81)   | 119.2(5)  |
| C(101)-C(91)-C(141)  | 119.3(5)  |
| C(81)-C(91)-C(141)   | 121.5(5)  |
| C(91)-C(101)-C(111)  | 121.9(5)  |
| C(91)-C(101)-H(101)  | 119.1     |
| C(111)-C(101)-H(101) | 119.1     |
| C(101)-C(111)-C(121) | 119.5(5)  |
| C(101)-C(111)-C(17B) | 112.6(10) |
| C(121)-C(111)-C(17B) | 127.3(10) |
| C(101)-C(111)-C(17A) | 129.5(9)  |
| C(121)-C(111)-C(17A) | 110.1(10) |
| C(111)-C(121)-C(131) | 120.1(5)  |
| C(111)-C(121)-H(121) | 120.0     |
| C(131)-C(121)-H(121) | 120.0     |
| C(81)-C(131)-C(121)  | 119.4(5)  |
| C(81)-C(131)-C(201)  | 122.4(4)  |
| C(121)-C(131)-C(201) | 118.1(5)  |
| C(91)-C(141)-C(161)  | 114.2(6)  |
| C(91)-C(141)-C(151)  | 111.1(5)  |
| C(161)-C(141)-C(151) | 111.3(6)  |
| C(91)-C(141)-H(141)  | 106.6     |
| C(161)-C(141)-H(141) | 106.6     |
| C(151)-C(141)-H(141) | 106.6     |
| C(141)-C(151)-H(15A) | 109.5     |
| C(141)-C(151)-H(15B) | 109.5     |
| H(15A)-C(151)-H(15B) | 109.5     |
| C(141)-C(151)-H(15C) | 109.5     |
| H(15A)-C(151)-H(15C) | 109.5     |
| H(15B)-C(151)-H(15C) | 109.5     |
| C(141)-C(161)-H(16A) | 109.5     |
| C(141)-C(161)-H(16B) | 109.5     |
| H(16A)-C(161)-H(16B) | 109.5     |
| C(141)-C(161)-H(16C) | 109.5     |
| H(16A)-C(161)-H(16C) | 109.5     |
| H(16B)-C(161)-H(16C) | 109.5     |
| C(19A)-C(17A)-C(18A) | 112(2)    |
| C(19A)-C(17A)-C(111) | 112.8(14) |
| C(18A)-C(17A)-C(111) | 106.3(19) |
| C(19A)-C(17A)-H(17A) | 108.5     |
| C(18A)-C(17A)-H(17A) | 108.5     |
| C(111)-C(17A)-H(17A) | 108.5     |
| C(17A)-C(18A)-H(18A) | 109.5     |
| C(17A)-C(18A)-H(18B) | 109.5     |
| H(18A)-C(18A)-H(18B) | 109.5     |
| C(17A)-C(18A)-H(18C) | 109.5     |
| H(18A)-C(18A)-H(18C) | 109.5     |
| H(18B)-C(18A)-H(18C) | 109.5     |
| C(17A)-C(19A)-H(19A) | 109.5     |
| C(17A)-C(19A)-H(19B) | 109.5     |
| H(19A)-C(19A)-H(19B) | 109.5     |
| C(17A)-C(19A)-H(19C) | 109.5     |
| H(19A)-C(19A)-H(19C) | 109.5     |
| H(19B)-C(19A)-H(19C) | 109.5     |
| C(19B)-C(17B)-C(18B) | 118(3)    |
| C(19B)-C(17B)-C(111) | 103.4(18) |

|                      |          |
|----------------------|----------|
| C(18B)-C(17B)-C(111) | 96.9(13) |
| C(19B)-C(17B)-H(17B) | 112.2    |
| C(18B)-C(17B)-H(17B) | 112.2    |
| C(111)-C(17B)-H(17B) | 112.2    |
| C(17B)-C(18B)-H(18D) | 109.5    |
| C(17B)-C(18B)-H(18E) | 109.5    |
| H(18D)-C(18B)-H(18E) | 109.5    |
| C(17B)-C(18B)-H(18F) | 109.5    |
| H(18D)-C(18B)-H(18F) | 109.5    |
| H(18E)-C(18B)-H(18F) | 109.5    |
| C(17B)-C(19B)-H(19D) | 109.5    |
| C(17B)-C(19B)-H(19E) | 109.5    |
| H(19D)-C(19B)-H(19E) | 109.5    |
| C(17B)-C(19B)-H(19F) | 109.5    |
| H(19D)-C(19B)-H(19F) | 109.5    |
| H(19E)-C(19B)-H(19F) | 109.5    |
| C(211)-C(201)-C(221) | 112.3(4) |
| C(211)-C(201)-C(131) | 112.5(4) |
| C(221)-C(201)-C(131) | 111.5(4) |
| C(211)-C(201)-H(201) | 106.7    |
| C(221)-C(201)-H(201) | 106.7    |
| C(131)-C(201)-H(201) | 106.7    |
| C(201)-C(211)-H(21A) | 109.5    |
| C(201)-C(211)-H(21B) | 109.5    |
| H(21A)-C(211)-H(21B) | 109.5    |
| C(201)-C(211)-H(21C) | 109.5    |
| H(21A)-C(211)-H(21C) | 109.5    |
| H(21B)-C(211)-H(21C) | 109.5    |
| C(201)-C(221)-H(22A) | 109.5    |
| C(201)-C(221)-H(22B) | 109.5    |
| H(22A)-C(221)-H(22B) | 109.5    |
| C(201)-C(221)-H(22C) | 109.5    |
| H(22A)-C(221)-H(22C) | 109.5    |
| H(22B)-C(221)-H(22C) | 109.5    |
| C(23)#1-C(13)-C(23)  | 121.3(5) |
| C(23)#1-C(13)-H(13)  | 119.3    |
| C(23)-C(13)-H(13)    | 119.3    |
| C(33)-C(23)-C(13)    | 118.8(4) |
| C(33)-C(23)-C(21)    | 121.4(3) |
| C(13)-C(23)-C(21)    | 119.4(4) |
| C(23)-C(33)-C(43)    | 121.3(4) |
| C(23)-C(33)-H(33)    | 119.3    |
| C(43)-C(33)-H(33)    | 119.3    |
| C(33)-C(43)-C(33)#1  | 118.3(6) |
| C(33)-C(43)-H(43)    | 120.8    |
| C(33)#1-C(43)-H(43)  | 120.8    |
| C(20)#1-O(10)-C(20)  | 107.8(6) |
| C(20)#1-O(10)-Fe(1)  | 124.8(3) |
| C(20)-O(10)-Fe(1)    | 124.8(3) |
| O(10)-C(20)-C(30)    | 104.4(6) |
| O(10)-C(20)-H(20A)   | 110.9    |
| C(30)-C(20)-H(20A)   | 110.9    |
| O(10)-C(20)-H(20B)   | 110.9    |
| C(30)-C(20)-H(20B)   | 110.9    |
| H(20A)-C(20)-H(20B)  | 108.9    |
| C(30)#1-C(30)-C(20)  | 111.7(4) |

|                      |          |
|----------------------|----------|
| C(30)#1-C(30)-H(30A) | 109.3    |
| C(20)-C(30)-H(30A)   | 109.3    |
| C(30)#1-C(30)-H(30B) | 109.3    |
| C(20)-C(30)-H(30B)   | 109.3    |
| H(30A)-C(30)-H(30B)  | 107.9    |
| C(50)#1-O(40)-C(50)  | 104.1(7) |
| C(50)#1-O(40)-Fe(1)  | 127.9(3) |
| C(50)-O(40)-Fe(1)    | 127.9(3) |
| C(60)-C(50)-O(40)    | 110.6(6) |
| C(60)-C(50)-H(50A)   | 109.5    |
| O(40)-C(50)-H(50A)   | 109.5    |
| C(60)-C(50)-H(50B)   | 109.5    |
| O(40)-C(50)-H(50B)   | 109.5    |
| H(50A)-C(50)-H(50B)  | 108.1    |
| C(50)-C(60)-C(60)#1  | 107.2(4) |
| C(50)-C(60)-H(60A)   | 110.3    |
| C(60)#1-C(60)-H(60A) | 110.3    |
| C(50)-C(60)-H(60B)   | 110.3    |
| C(60)#1-C(60)-H(60B) | 110.3    |
| H(60A)-C(60)-H(60B)  | 108.5    |

---

Symmetry transformations used to generate equivalent atoms:  
 #1 x,-y+1/2,z

**Anisotropic displacement parameters ( $\text{\AA}^2 \times 10^3$ ) for  $\text{LFe}(\text{THF})_2$  (1). The anisotropic displacement factor exponent takes the form:  $-2\pi^2 [ h^2 a^*2U^{11} + \dots + 2 h k a^* b^* U^{12} ]$**

|        | U <sup>11</sup> | U <sup>22</sup> | U <sup>33</sup> | U <sup>23</sup> | U <sup>13</sup> | U <sup>12</sup> |
|--------|-----------------|-----------------|-----------------|-----------------|-----------------|-----------------|
| Fe(1)  | 54(1)           | 48(1)           | 104(1)          | 0               | 12(1)           | 0               |
| S(11)  | 75(1)           | 65(1)           | 108(1)          | -18(1)          | -8(1)           | 15(1)           |
| C(11)  | 64(3)           | 56(2)           | 81(3)           | 5(2)            | 20(2)           | 8(2)            |
| C(21)  | 67(3)           | 54(2)           | 79(3)           | 8(2)            | 21(2)           | 3(2)            |
| C(31)  | 58(3)           | 55(2)           | 98(3)           | 17(2)           | 8(2)            | 4(2)            |
| C(41)  | 72(3)           | 59(3)           | 138(4)          | 30(3)           | 40(3)           | 21(2)           |
| C(51)  | 85(3)           | 52(2)           | 100(3)          | 7(2)            | 36(3)           | 9(2)            |
| C(61)  | 77(3)           | 49(2)           | 85(3)           | 6(2)            | 29(2)           | 5(2)            |
| F(71)  | 70(2)           | 81(2)           | 123(2)          | 21(1)           | -1(2)           | 7(1)            |
| C(81)  | 100(4)          | 54(2)           | 78(3)           | -2(2)           | 26(3)           | 2(2)            |
| C(91)  | 123(4)          | 61(3)           | 98(4)           | -6(2)           | 23(3)           | -10(3)          |
| C(101) | 177(6)          | 83(3)           | 79(3)           | -9(3)           | 24(4)           | -33(4)          |
| C(111) | 180(6)          | 98(4)           | 86(4)           | -15(3)          | 14(4)           | -35(4)          |
| C(121) | 129(5)          | 85(3)           | 106(4)          | -21(3)          | 22(4)           | -20(3)          |
| C(131) | 95(3)           | 64(3)           | 96(4)           | -8(2)           | 25(3)           | 0(2)            |
| C(141) | 148(5)          | 80(3)           | 105(4)          | -6(3)           | 37(4)           | -35(3)          |
| C(151) | 184(8)          | 144(6)          | 200(7)          | -9(5)           | 101(7)          | -40(6)          |
| C(161) | 210(8)          | 99(4)           | 170(7)          | 50(4)           | 15(6)           | -30(5)          |
| C(17A) | 239(15)         | 131(9)          | 77(8)           | -27(5)          | 16(9)           | -52(9)          |
| C(18A) | 270(20)         | 129(10)         | 90(13)          | -31(7)          | 28(13)          | -53(9)          |
| C(19A) | 209(18)         | 178(12)         | 120(11)         | 28(9)           | -10(11)         | -59(11)         |
| C(17B) | 135(11)         | 161(12)         | 108(10)         | -43(8)          | 36(8)           | -39(8)          |

|        |         |         |         |         |         |         |
|--------|---------|---------|---------|---------|---------|---------|
| C(18B) | 155(12) | 203(16) | 111(14) | -16(11) | 23(10)  | -12(11) |
| C(19B) | 250(20) | 152(11) | 120(20) | -53(9)  | -14(17) | -63(10) |
| C(201) | 92(3)   | 65(3)   | 96(3)   | -6(2)   | 30(3)   | -12(2)  |
| C(211) | 110(5)  | 140(5)  | 132(5)  | -1(4)   | 47(4)   | 0(4)    |
| C(221) | 162(6)  | 70(3)   | 126(4)  | 8(3)    | 56(4)   | 2(3)    |
| C(13)  | 51(3)   | 49(3)   | 84(4)   | 0       | 5(3)    | 0       |
| C(23)  | 61(3)   | 61(2)   | 75(3)   | 3(2)    | 8(2)    | 6(2)    |
| C(33)  | 75(3)   | 75(3)   | 86(3)   | 10(2)   | 13(2)   | 6(2)    |
| C(43)  | 93(5)   | 74(4)   | 89(5)   | 0       | 6(4)    | 0       |
| O(10)  | 87(3)   | 59(2)   | 131(4)  | 0       | 46(3)   | 0       |
| C(20)  | 122(5)  | 99(4)   | 172(6)  | 40(4)   | 48(4)   | -25(3)  |
| C(30)  | 241(9)  | 266(13) | 194(7)  | -38(7)  | 116(7)  | -129(8) |
| O(40)  | 65(3)   | 68(3)   | 204(5)  | 0       | -5(3)   | 0       |
| C(50)  | 76(4)   | 91(4)   | 491(16) | 10(6)   | -55(7)  | -29(3)  |
| C(60)  | 93(4)   | 211(8)  | 226(8)  | -78(6)  | 19(5)   | -24(4)  |

**Hydrogen coordinates (  $\times 10^4$ ) and isotropic displacement parameters ( $\text{\AA}^2 \times 10^3$ ) for  $\text{LFe}(\text{THF})_2$  (1).**

|        | x    | y    | z     | U(eq) |
|--------|------|------|-------|-------|
| H(41)  | -430 | 4558 | 5263  | 104   |
| H(51)  | 1385 | 4851 | 6368  | 92    |
| H(101) | 4547 | 4338 | 9006  | 136   |
| H(121) | 6964 | 5218 | 7641  | 128   |
| H(141) | 2052 | 3692 | 7403  | 131   |
| H(15A) | 1421 | 4346 | 8730  | 252   |
| H(15B) | 219  | 3936 | 8195  | 252   |
| H(15C) | 778  | 4497 | 7816  | 252   |
| H(16A) | 3802 | 3167 | 8323  | 243   |
| H(16B) | 2083 | 3110 | 8487  | 243   |
| H(16C) | 3290 | 3508 | 9041  | 243   |
| H(17A) | 8304 | 5017 | 8862  | 181   |
| H(18A) | 6929 | 5843 | 8938  | 247   |
| H(18B) | 7798 | 5703 | 9825  | 247   |
| H(18C) | 6001 | 5571 | 9568  | 247   |
| H(19A) | 6822 | 4573 | 10085 | 261   |
| H(19B) | 8623 | 4698 | 10174 | 261   |
| H(19C) | 7853 | 4204 | 9600  | 261   |
| H(17B) | 6106 | 4985 | 9705  | 159   |
| H(18D) | 7805 | 4259 | 9394  | 234   |
| H(18E) | 8826 | 4737 | 9897  | 234   |
| H(18F) | 8704 | 4707 | 8949  | 234   |
| H(19D) | 7463 | 5703 | 8644  | 272   |
| H(19E) | 7635 | 5838 | 9576  | 272   |
| H(19F) | 5976 | 5857 | 9015  | 272   |
| H(201) | 4780 | 4752 | 5770  | 99    |
| H(21A) | 7747 | 5137 | 6460  | 186   |
| H(21B) | 7151 | 5024 | 5529  | 186   |



|        |       |      |      |     |
|--------|-------|------|------|-----|
| H(21C) | 7346  | 4511 | 6146 | 186 |
| H(22A) | 3812  | 5617 | 6098 | 173 |
| H(22B) | 5013  | 5708 | 5510 | 173 |
| H(22C) | 5515  | 5835 | 6443 | 173 |
| H(13)  | 2249  | 2500 | 5790 | 74  |
| H(33)  | 2139  | 3350 | 3744 | 95  |
| H(43)  | 2228  | 2500 | 3052 | 104 |
| H(20A) | 7015  | 3218 | 4653 | 154 |
| H(20B) | 5392  | 3228 | 4044 | 154 |
| H(30A) | 6490  | 2900 | 3113 | 269 |
| H(30B) | 8108  | 2900 | 3714 | 269 |
| H(50A) | 8676  | 3170 | 5975 | 279 |
| H(50B) | 8044  | 3220 | 6796 | 279 |
| H(60A) | 10071 | 2940 | 7419 | 213 |
| H(60B) | 10746 | 2940 | 6604 | 213 |

---

### Torsion angles [°] for LFe(THF)<sub>2</sub> (1).

|                             |            |
|-----------------------------|------------|
| Fe(1)-S(11)-C(11)-C(61)     | 170.7(3)   |
| Fe(1)-S(11)-C(11)-C(21)     | -11.6(4)   |
| C(61)-C(11)-C(21)-C(31)     | 0.2(6)     |
| S(11)-C(11)-C(21)-C(31)     | -177.5(3)  |
| C(61)-C(11)-C(21)-C(23)     | -176.1(4)  |
| S(11)-C(11)-C(21)-C(23)     | 6.2(6)     |
| C(11)-C(21)-C(31)-F(71)     | -178.9(3)  |
| C(23)-C(21)-C(31)-F(71)     | -2.4(6)    |
| C(11)-C(21)-C(31)-C(41)     | -0.6(6)    |
| C(23)-C(21)-C(31)-C(41)     | 175.8(4)   |
| F(71)-C(31)-C(41)-C(51)     | 179.1(4)   |
| C(21)-C(31)-C(41)-C(51)     | 0.8(7)     |
| C(31)-C(41)-C(51)-C(61)     | -0.6(6)    |
| C(41)-C(51)-C(61)-C(11)     | 0.3(6)     |
| C(41)-C(51)-C(61)-C(81)     | -178.5(4)  |
| C(21)-C(11)-C(61)-C(51)     | -0.1(6)    |
| S(11)-C(11)-C(61)-C(51)     | 177.8(3)   |
| C(21)-C(11)-C(61)-C(81)     | 178.7(4)   |
| S(11)-C(11)-C(61)-C(81)     | -3.5(5)    |
| C(51)-C(61)-C(81)-C(131)    | -92.5(5)   |
| C(11)-C(61)-C(81)-C(131)    | 88.7(5)    |
| C(51)-C(61)-C(81)-C(91)     | 86.8(5)    |
| C(11)-C(61)-C(81)-C(91)     | -91.9(5)   |
| C(131)-C(81)-C(91)-C(101)   | 1.6(7)     |
| C(61)-C(81)-C(91)-C(101)    | -177.7(5)  |
| C(131)-C(81)-C(91)-C(141)   | -179.2(5)  |
| C(61)-C(81)-C(91)-C(141)    | 1.4(7)     |
| C(81)-C(91)-C(101)-C(111)   | -1.1(9)    |
| C(141)-C(91)-C(101)-C(111)  | 179.7(6)   |
| C(91)-C(101)-C(111)-C(121)  | 0.9(10)    |
| C(91)-C(101)-C(111)-C(17B)  | 172.5(8)   |
| C(91)-C(101)-C(111)-C(17A)  | -167.2(12) |
| C(101)-C(111)-C(121)-C(131) | -1.1(9)    |

|                             |            |
|-----------------------------|------------|
| C(17B)-C(111)-C(121)-C(131) | -171.4(9)  |
| C(17A)-C(111)-C(121)-C(131) | 169.1(9)   |
| C(91)-C(81)-C(131)-C(121)   | -1.8(7)    |
| C(61)-C(81)-C(131)-C(121)   | 177.5(4)   |
| C(91)-C(81)-C(131)-C(201)   | -177.4(4)  |
| C(61)-C(81)-C(131)-C(201)   | 1.9(6)     |
| C(111)-C(121)-C(131)-C(81)  | 1.6(8)     |
| C(111)-C(121)-C(131)-C(201) | 177.3(5)   |
| C(101)-C(91)-C(141)-C(161)  | -49.8(8)   |
| C(81)-C(91)-C(141)-C(161)   | 131.0(6)   |
| C(101)-C(91)-C(141)-C(151)  | 77.1(7)    |
| C(81)-C(91)-C(141)-C(151)   | -102.1(6)  |
| C(101)-C(111)-C(17A)-C(19A) | 22(3)      |
| C(121)-C(111)-C(17A)-C(19A) | -147(2)    |
| C(101)-C(111)-C(17A)-C(18A) | -101.3(18) |
| C(121)-C(111)-C(17A)-C(18A) | 90(2)      |
| C(101)-C(111)-C(17B)-C(19B) | -136(3)    |
| C(121)-C(111)-C(17B)-C(19B) | 34(3)      |
| C(101)-C(111)-C(17B)-C(18B) | 102.1(18)  |
| C(121)-C(111)-C(17B)-C(18B) | -87.0(17)  |
| C(81)-C(131)-C(201)-C(211)  | -130.6(5)  |
| C(121)-C(131)-C(201)-C(211) | 53.8(6)    |
| C(81)-C(131)-C(201)-C(221)  | 102.2(5)   |
| C(121)-C(131)-C(201)-C(221) | -73.4(6)   |
| C(23)#1-C(13)-C(23)-C(33)   | 0.4(8)     |
| C(23)#1-C(13)-C(23)-C(21)   | 173.6(3)   |
| C(31)-C(21)-C(23)-C(33)     | 58.0(6)    |
| C(11)-C(21)-C(23)-C(33)     | -125.7(4)  |
| C(31)-C(21)-C(23)-C(13)     | -115.0(5)  |
| C(11)-C(21)-C(23)-C(13)     | 61.3(6)    |
| C(13)-C(23)-C(33)-C(43)     | -1.9(7)    |
| C(21)-C(23)-C(33)-C(43)     | -175.0(5)  |
| C(23)-C(33)-C(43)-C(33)#1   | 3.3(9)     |
| C(20)#1-O(10)-C(20)-C(30)   | 1.5(9)     |
| Fe(1)-O(10)-C(20)-C(30)     | 163.5(5)   |
| O(10)-C(20)-C(30)-C(30)#1   | -0.9(6)    |
| C(50)#1-O(40)-C(50)-C(60)   | -6.9(16)   |
| Fe(1)-O(40)-C(50)-C(60)     | 170.1(6)   |
| O(40)-C(50)-C(60)-C(60)#1   | 4.4(11)    |

---

Symmetry transformations used to generate equivalent atoms:

#1 x,-y+1/2,z

## *Experimental and Refinement Details for LFeK (2)*

Single crystals for X-ray analysis were obtained as follows. A sample (0.5 mL) of the reaction mixture after dilution with hexane at  $-70\text{ }^{\circ}\text{C}$  was added to hexane (0.5 mL) at room temperature. After 16 h at room temperature brown-yellow needles formed. Low-temperature diffraction data ( $\omega$ -scans) were collected on a Rigaku MicroMax-007HF diffractometer coupled to a Saturn994+ CCD detector with  $\text{Cu K}\alpha$  ( $\lambda = 1.54178\text{ \AA}$ ). The structure was solved by direct methods using SHELXT and was refined against  $F^2$  on all data by full-matrix least squares with SHELXL<sup>50</sup>. All non-hydrogen atoms were refined anisotropically. Unless otherwise noted, hydrogen atoms were included in the model at geometrically calculated positions and refined using a riding model. The isotropic displacement parameters of all hydrogen atoms were fixed to 1.2 times the U value of the atoms to which they are linked (1.5 times for methyl groups).

There are three sites in the difference map where signs of obvious disorder existed. One of the terminal isopropyl groups was modeled over two positions with atoms {C17A, C18A, C19A} and {C17B, C18B, C19B}. The site occupancies were freely refined and converged at 0.35(2) and 0.65(2) for the "A" and "B" sites, respectively. An identical approach was used for a second terminal isopropyl group. The two positions in this model contained atoms {C20C, C21C} and {C20D, C21D}. The site occupancies were freely refined and converged at 0.42(1) and 0.58(2) for the "C" and "D" sites, respectively. Finally, the THF molecule coordinated to the potassium has two orientations for each of its carbon atoms. The atoms involved are {C7E, C8E, C9E, C10E} and {C7F, C8F, C9F, C10F}. The site occupancies were freely refined and converged at 0.42(1) and 0.58(2) for the "C" and "D" sites, respectively.

The hydrogen atoms of the disordered model were placed and fixed in their geometrically expected positions and refined with an atomic displacement parameters riding on their parent carbon atoms. The positions and occupancies reflect their respective disordered model.

In all three disordered areas of the model, the two positions modeled are chemically identical and expected to have similar bond distances and atomic displacement parameters. Consequently, similarity restraints were used to refine the models to convergence.



## Crystal data and structure refinement for LFeK (2).

|                                           |                                                                    |                              |
|-------------------------------------------|--------------------------------------------------------------------|------------------------------|
| Identification code                       | 007-15046                                                          |                              |
| Empirical formula                         | $C_{56}H_{70}F_2FeKO_2S_2$                                         |                              |
| Formula weight                            | 972.19                                                             |                              |
| Temperature                               | 93(2) K                                                            |                              |
| Wavelength                                | 1.54187 Å                                                          |                              |
| Crystal system                            | Triclinic                                                          |                              |
| Space group                               | $P\bar{1}$                                                         |                              |
| Unit cell dimensions                      | $a = 9.0455(6)$ Å                                                  | $\alpha = 69.061(3)^\circ$ . |
|                                           | $b = 15.7673(11)$ Å                                                | $\beta = 82.861(3)^\circ$ .  |
|                                           | $c = 19.5139(13)$ Å                                                | $\gamma = 84.192(3)^\circ$ . |
| Volume                                    | $2574.3(3)$ Å <sup>3</sup>                                         |                              |
| Z                                         | 2                                                                  |                              |
| Density (calculated)                      | 1.254 g/cm <sup>3</sup>                                            |                              |
| Absorption coefficient                    | 4.197 mm <sup>-1</sup>                                             |                              |
| F(000)                                    | 1034                                                               |                              |
| Crystal size                              | 0.140 x 0.050 x 0.040 mm <sup>3</sup>                              |                              |
| Crystal color and habit                   | Yellow plate                                                       |                              |
| Diffractometer                            | Rigaku Saturn 944+ CCD                                             |                              |
| $\Theta$ range for data collection        | 2.435 to 68.173°.                                                  |                              |
| Index ranges                              | $-10 \leq h \leq 10$ , $-18 \leq k \leq 18$ , $-23 \leq l \leq 23$ |                              |
| Reflections collected                     | 74227                                                              |                              |
| Independent reflections                   | 9114 [R(int) = 0.2786]                                             |                              |
| Observed reflections ( $I > 2\sigma(I)$ ) | 6183                                                               |                              |
| Completeness to $\theta = 67.687^\circ$   | 97.7 %                                                             |                              |
| Absorption correction                     | Semi-empirical from equivalents                                    |                              |
| Max. and min. transmission                | 0.850 and 0.554                                                    |                              |
| Solution method                           | SHELXT-2014/5 (Sheldrick, 2014)                                    |                              |
| Refinement method                         | SHELXL-2014/7 (Sheldrick, 2014)                                    |                              |
| Data / restraints / parameters            | 9114 / 128 / 664                                                   |                              |
| Goodness-of-fit on $F^2$                  | 0.977                                                              |                              |
| Final R indices [ $I > 2\sigma(I)$ ]      | $R1 = 0.0651$ , $wR2 = 0.1607$                                     |                              |
| R indices (all data)                      | $R1 = 0.0887$ , $wR2 = 0.1697$                                     |                              |
| Largest diff. peak and hole               | 0.874 and -0.852 e.Å <sup>-3</sup>                                 |                              |

**Atomic coordinates (  $\times 10^4$ ) and equivalent isotropic displacement parameters ( $\text{\AA}^2 \times 10^3$ ) for LFeK (2). U(eq) is defined as one third of the trace of the orthogonalized  $U^{ij}$  tensor.**

|        | x        | y         | z         | U(eq) |
|--------|----------|-----------|-----------|-------|
| Fe(1)  | 4033(1)  | 8195(1)   | 6156(1)   | 22(1) |
| S(11)  | 4872(1)  | 8840(1)   | 6896(1)   | 31(1) |
| S(21)  | 5307(1)  | 6812(1)   | 6563(1)   | 28(1) |
| C(11)  | 3150(3)  | 9338(2)   | 7165(2)   | 26(1) |
| C(21)  | 1882(3)  | 9326(2)   | 6813(2)   | 25(1) |
| C(31)  | 509(3)   | 9613(2)   | 7086(2)   | 27(1) |
| C(41)  | 317(4)   | 9940(2)   | 7654(2)   | 30(1) |
| C(51)  | 1583(4)  | 9967(2)   | 7981(2)   | 29(1) |
| C(61)  | 3004(3)  | 9659(2)   | 7754(2)   | 24(1) |
| F(71)  | -727(2)  | 9547(1)   | 6762(1)   | 34(1) |
| C(81)  | 4286(3)  | 9605(2)   | 8185(2)   | 25(1) |
| C(91)  | 5162(3)  | 10343(2)  | 8026(2)   | 27(1) |
| C(101) | 6289(4)  | 10276(2)  | 8469(2)   | 32(1) |
| C(111) | 6588(4)  | 9485(2)   | 9060(2)   | 35(1) |
| C(121) | 5728(4)  | 8760(2)   | 9203(2)   | 38(1) |
| C(131) | 4574(4)  | 8796(2)   | 8779(2)   | 38(1) |
| C(141) | 4950(4)  | 11199(2)  | 7364(3)   | 39(1) |
| C(151) | 4435(7)  | 12018(3)  | 7603(4)   | 77(2) |
| C(161) | 6356(5)  | 11391(3)  | 6837(3)   | 49(1) |
| C(17A) | 7820(30) | 9513(15)  | 9521(14)  | 48(6) |
| C(18A) | 7334(15) | 10108(15) | 10020(11) | 60(5) |
| C(17B) | 7793(14) | 9433(9)   | 9555(8)   | 49(4) |
| C(18B) | 7037(8)  | 9337(8)   | 10344(5)  | 62(3) |
| C(191) | 8812(5)  | 8595(4)   | 9703(4)   | 72(2) |
| C(201) | 3647(5)  | 7984(3)   | 8976(3)   | 60(2) |
| C(211) | 2788(6)  | 7795(4)   | 9737(4)   | 87(2) |
| C(221) | 4610(7)  | 7138(3)   | 8951(5)   | 94(3) |
| C(12)  | 3944(3)  | 6108(2)   | 6520(2)   | 24(1) |
| C(22)  | 2582(3)  | 6529(2)   | 6242(2)   | 24(1) |
| C(32)  | 1451(3)  | 5989(2)   | 6282(2)   | 30(1) |
| C(42)  | 1565(4)  | 5057(2)   | 6555(2)   | 32(1) |
| C(52)  | 2934(4)  | 4653(2)   | 6798(2)   | 34(1) |
| C(62)  | 4116(4)  | 5151(2)   | 6789(2)   | 27(1) |
| F(72)  | 108(2)   | 6420(1)   | 6046(2)   | 38(1) |
| C(82)  | 5543(4)  | 4646(2)   | 7091(2)   | 29(1) |
| C(92)  | 6685(3)  | 4453(2)   | 6610(2)   | 27(1) |
| C(102) | 7952(4)  | 3917(2)   | 6898(2)   | 32(1) |
| C(112) | 8140(5)  | 3606(2)   | 7627(3)   | 42(1) |
| C(122) | 7011(6)  | 3819(3)   | 8100(3)   | 55(1) |
| C(132) | 5687(5)  | 4325(2)   | 7841(3)   | 49(1) |
| C(142) | 6587(4)  | 4782(2)   | 5787(2)   | 29(1) |
| C(152) | 6297(4)  | 4012(2)   | 5532(3)   | 40(1) |
| C(162) | 7968(5)  | 5262(3)   | 5338(3)   | 52(1) |
| C(172) | 9551(5)  | 3031(3)   | 7911(3)   | 54(1) |
| C(182) | 9261(5)  | 2044(3)   | 8222(4)   | 62(2) |
| C(192) | 10210(6) | 3341(3)   | 8451(3)   | 61(2) |
| C(20C) | 4164(15) | 4475(7)   | 8307(7)   | 48(3) |
| C(21C) | 4284(15) | 5275(8)   | 8542(9)   | 66(4) |
| C(20D) | 4628(10) | 4546(6)   | 8437(5)   | 46(2) |
| C(21D) | 5346(10) | 4873(5)   | 8950(5)   | 55(3) |

|        |           |          |          |         |
|--------|-----------|----------|----------|---------|
| C(222) | 3788(6)   | 3679(4)  | 8925(4)  | 74(2)   |
| C(13)  | 1768(3)   | 8001(2)  | 6414(2)  | 23(1)   |
| C(23)  | 2055(3)   | 8937(2)  | 6221(2)  | 24(1)   |
| C(33)  | 2880(4)   | 9398(2)  | 5539(2)  | 27(1)   |
| C(43)  | 3467(4)   | 8937(2)  | 5051(2)  | 27(1)   |
| C(53)  | 3256(3)   | 8004(2)  | 5266(2)  | 26(1)   |
| C(63)  | 2423(3)   | 7530(2)  | 5947(2)  | 23(1)   |
| K(1)   | -1928(1)  | 8006(1)  | 6401(1)  | 50(1)   |
| O(10)  | -1834(3)  | 8262(2)  | 4960(2)  | 47(1)   |
| C(20)  | -2732(4)  | 7991(3)  | 4525(3)  | 46(1)   |
| C(30)  | -1701(5)  | 7778(3)  | 3928(3)  | 57(1)   |
| C(40)  | -192(5)   | 7720(4)  | 4186(3)  | 74(2)   |
| C(50)  | -376(4)   | 8388(3)  | 4584(3)  | 64(2)   |
| O(60)  | -1052(4)  | 7022(2)  | 7719(2)  | 59(1)   |
| C(7E)  | -1170(60) | 7340(20) | 8331(14) | 149(16) |
| C(8E)  | -860(60)  | 6514(19) | 8979(17) | 120(10) |
| C(9E)  | -330(60)  | 5860(30) | 8590(30) | 157(14) |
| C(10E) | -1000(30) | 6055(9)  | 7889(18) | 104(10) |
| C(7F)  | -872(13)  | 7340(8)  | 8300(6)  | 42(4)   |
| C(8F)  | -430(50)  | 6563(10) | 8940(13) | 134(12) |
| C(9F)  | -890(40)  | 5750(9)  | 8825(10) | 151(11) |
| C(10F) | -790(30)  | 6058(6)  | 8009(9)  | 96(7)   |

---

### Bond lengths [Å] and angles [°] for LFeK (2).

|              |            |
|--------------|------------|
| Fe(1)-C(63)  | 2.035(3)   |
| Fe(1)-C(23)  | 2.052(3)   |
| Fe(1)-C(13)  | 2.075(3)   |
| Fe(1)-C(53)  | 2.078(4)   |
| Fe(1)-C(33)  | 2.101(3)   |
| Fe(1)-C(43)  | 2.151(4)   |
| Fe(1)-S(11)  | 2.2762(11) |
| Fe(1)-S(21)  | 2.2791(7)  |
| Fe(1)-K(1)#1 | 3.7120(9)  |
| S(11)-C(11)  | 1.778(3)   |
| S(11)-K(1)#1 | 3.2374(11) |
| S(21)-C(12)  | 1.768(4)   |
| S(21)-K(1)#1 | 3.1996(12) |
| C(11)-C(61)  | 1.401(5)   |
| C(11)-C(21)  | 1.413(5)   |
| C(21)-C(31)  | 1.388(5)   |
| C(21)-C(23)  | 1.476(5)   |
| C(31)-C(41)  | 1.365(6)   |
| C(31)-F(71)  | 1.381(4)   |
| C(41)-C(51)  | 1.390(5)   |
| C(41)-H(41)  | 0.9500     |
| C(51)-C(61)  | 1.404(5)   |
| C(51)-H(51)  | 0.9500     |
| C(61)-C(81)  | 1.494(5)   |
| F(71)-K(1)   | 3.086(2)   |
| C(81)-C(91)  | 1.395(5)   |

|               |           |
|---------------|-----------|
| C(81)-C(131)  | 1.410(5)  |
| C(91)-C(101)  | 1.388(5)  |
| C(91)-C(141)  | 1.512(5)  |
| C(101)-C(111) | 1.394(5)  |
| C(101)-H(101) | 0.9500    |
| C(111)-C(121) | 1.374(6)  |
| C(111)-C(17B) | 1.522(9)  |
| C(111)-C(17A) | 1.527(15) |
| C(121)-C(131) | 1.395(6)  |
| C(121)-H(121) | 0.9500    |
| C(131)-C(201) | 1.509(6)  |
| C(141)-C(161) | 1.516(6)  |
| C(141)-C(151) | 1.535(6)  |
| C(141)-H(141) | 1.0000    |
| C(151)-H(15A) | 0.9800    |
| C(151)-H(15B) | 0.9800    |
| C(151)-H(15C) | 0.9800    |
| C(161)-H(16A) | 0.9800    |
| C(161)-H(16B) | 0.9800    |
| C(161)-H(16C) | 0.9800    |
| C(17A)-C(191) | 1.575(15) |
| C(17A)-C(18A) | 1.576(14) |
| C(17A)-H(17A) | 1.0000    |
| C(18A)-H(18A) | 0.9800    |
| C(18A)-H(18B) | 0.9800    |
| C(18A)-H(18C) | 0.9800    |
| C(17B)-C(191) | 1.491(11) |
| C(17B)-C(18B) | 1.566(14) |
| C(17B)-H(17B) | 1.0000    |
| C(18B)-H(18D) | 0.9800    |
| C(18B)-H(18E) | 0.9800    |
| C(18B)-H(18F) | 0.9800    |
| C(191)-H(19A) | 0.9800    |
| C(191)-H(19B) | 0.9800    |
| C(191)-H(19C) | 0.9800    |
| C(191)-H(19D) | 0.9800    |
| C(191)-H(19E) | 0.9800    |
| C(191)-H(19F) | 0.9800    |
| C(201)-C(221) | 1.530(7)  |
| C(201)-C(211) | 1.531(9)  |
| C(201)-H(201) | 1.0000    |
| C(211)-H(21A) | 0.9800    |
| C(211)-H(21B) | 0.9800    |
| C(211)-H(21C) | 0.9800    |
| C(221)-H(22A) | 0.9800    |
| C(221)-H(22B) | 0.9800    |
| C(221)-H(22C) | 0.9800    |
| C(12)-C(62)   | 1.408(4)  |
| C(12)-C(22)   | 1.412(4)  |
| C(22)-C(32)   | 1.375(5)  |
| C(22)-C(63)   | 1.472(4)  |
| C(32)-C(42)   | 1.371(5)  |
| C(32)-F(72)   | 1.377(3)  |
| C(42)-C(52)   | 1.391(5)  |
| C(42)-H(42)   | 0.9500    |
| C(52)-C(62)   | 1.384(5)  |



|               |           |
|---------------|-----------|
| C(52)-H(52)   | 0.9500    |
| C(62)-C(82)   | 1.514(4)  |
| F(72)-K(1)    | 3.181(2)  |
| C(82)-C(132)  | 1.386(6)  |
| C(82)-C(92)   | 1.392(6)  |
| C(92)-C(102)  | 1.404(4)  |
| C(92)-C(142)  | 1.512(6)  |
| C(102)-C(112) | 1.355(6)  |
| C(102)-H(102) | 0.9500    |
| C(112)-C(122) | 1.388(7)  |
| C(112)-C(172) | 1.530(5)  |
| C(122)-C(132) | 1.412(6)  |
| C(122)-H(122) | 0.9500    |
| C(132)-C(20D) | 1.529(9)  |
| C(132)-C(20C) | 1.599(12) |
| C(142)-C(152) | 1.522(6)  |
| C(142)-C(162) | 1.532(6)  |
| C(142)-H(142) | 1.0000    |
| C(152)-H(15D) | 0.9800    |
| C(152)-H(15E) | 0.9800    |
| C(152)-H(15F) | 0.9800    |
| C(162)-H(16D) | 0.9800    |
| C(162)-H(16E) | 0.9800    |
| C(162)-H(16F) | 0.9800    |
| C(172)-C(182) | 1.491(6)  |
| C(172)-C(192) | 1.512(7)  |
| C(172)-H(172) | 1.0000    |
| C(182)-H(18G) | 0.9800    |
| C(182)-H(18H) | 0.9800    |
| C(182)-H(18I) | 0.9800    |
| C(192)-H(19G) | 0.9800    |
| C(192)-H(19H) | 0.9800    |
| C(192)-H(19I) | 0.9800    |
| C(20C)-C(222) | 1.431(12) |
| C(20C)-C(21C) | 1.505(13) |
| C(20C)-H(20C) | 1.0000    |
| C(21C)-H(21D) | 0.9800    |
| C(21C)-H(21E) | 0.9800    |
| C(21C)-H(21F) | 0.9800    |
| C(20D)-C(21D) | 1.512(11) |
| C(20D)-C(222) | 1.567(10) |
| C(20D)-H(20D) | 1.0000    |
| C(21D)-H(21G) | 0.9800    |
| C(21D)-H(21H) | 0.9800    |
| C(21D)-H(21I) | 0.9800    |
| C(222)-H(22G) | 0.9800    |
| C(222)-H(22H) | 0.9800    |
| C(222)-H(22I) | 0.9800    |
| C(222)-H(22D) | 0.9800    |
| C(222)-H(22E) | 0.9800    |
| C(222)-H(22F) | 0.9800    |
| C(13)-C(63)   | 1.411(5)  |
| C(13)-C(23)   | 1.428(4)  |
| C(13)-K(1)    | 3.346(3)  |
| C(13)-H(13)   | 0.9500    |
| C(23)-C(33)   | 1.423(5)  |

|                   |            |
|-------------------|------------|
| C(33)-C(43)       | 1.417(5)   |
| C(33)-H(33)       | 0.9500     |
| C(43)-C(53)       | 1.404(5)   |
| C(43)-H(43)       | 0.9500     |
| C(53)-C(63)       | 1.432(5)   |
| C(53)-H(53)       | 0.9500     |
| K(1)-O(60)        | 2.656(4)   |
| K(1)-O(10)        | 2.686(4)   |
| K(1)-S(21)#2      | 3.1996(12) |
| K(1)-S(11)#2      | 3.2374(11) |
| O(10)-C(50)       | 1.423(6)   |
| O(10)-C(20)       | 1.437(6)   |
| C(20)-C(30)       | 1.511(7)   |
| C(20)-H(20A)      | 0.9900     |
| C(20)-H(20B)      | 0.9900     |
| C(30)-C(40)       | 1.496(8)   |
| C(30)-H(30A)      | 0.9900     |
| C(30)-H(30B)      | 0.9900     |
| C(40)-C(50)       | 1.502(9)   |
| C(40)-H(40A)      | 0.9900     |
| C(40)-H(40B)      | 0.9900     |
| C(50)-H(50A)      | 0.9900     |
| C(50)-H(50B)      | 0.9900     |
| O(60)-C(10F)      | 1.426(9)   |
| O(60)-C(7F)       | 1.426(9)   |
| O(60)-C(10E)      | 1.437(14)  |
| O(60)-C(7E)       | 1.440(15)  |
| C(7E)-C(8E)       | 1.486(16)  |
| C(7E)-H(7EA)      | 0.9900     |
| C(7E)-H(7EB)      | 0.9900     |
| C(8E)-C(9E)       | 1.499(17)  |
| C(8E)-H(8EA)      | 0.9900     |
| C(8E)-H(8EB)      | 0.9900     |
| C(9E)-C(10E)      | 1.485(18)  |
| C(9E)-H(9EA)      | 0.9900     |
| C(9E)-H(9EB)      | 0.9900     |
| C(10E)-H(10A)     | 0.9900     |
| C(10E)-H(10B)     | 0.9900     |
| C(7F)-C(8F)       | 1.467(13)  |
| C(7F)-H(7FA)      | 0.9900     |
| C(7F)-H(7FB)      | 0.9900     |
| C(8F)-C(9F)       | 1.487(16)  |
| C(8F)-H(8FA)      | 0.9900     |
| C(8F)-H(8FB)      | 0.9900     |
| C(9F)-C(10F)      | 1.483(14)  |
| C(9F)-H(9FA)      | 0.9900     |
| C(9F)-H(9FB)      | 0.9900     |
| C(10F)-H(10C)     | 0.9900     |
| C(10F)-H(10D)     | 0.9900     |
|                   |            |
| C(63)-Fe(1)-C(23) | 73.38(13)  |
| C(63)-Fe(1)-C(13) | 40.15(14)  |
| C(23)-Fe(1)-C(13) | 40.49(12)  |
| C(63)-Fe(1)-C(53) | 40.73(14)  |
| C(23)-Fe(1)-C(53) | 86.07(14)  |
| C(13)-Fe(1)-C(53) | 72.82(14)  |

|                    |            |
|--------------------|------------|
| C(63)-Fe(1)-C(33)  | 86.05(12)  |
| C(23)-Fe(1)-C(33)  | 40.07(14)  |
| C(13)-Fe(1)-C(33)  | 72.59(12)  |
| C(53)-Fe(1)-C(33)  | 70.88(13)  |
| C(63)-Fe(1)-C(43)  | 72.32(13)  |
| C(23)-Fe(1)-C(43)  | 72.03(13)  |
| C(13)-Fe(1)-C(43)  | 85.61(13)  |
| C(53)-Fe(1)-C(43)  | 38.72(13)  |
| C(33)-Fe(1)-C(43)  | 38.92(14)  |
| C(63)-Fe(1)-S(11)  | 149.17(11) |
| C(23)-Fe(1)-S(11)  | 86.79(11)  |
| C(13)-Fe(1)-S(11)  | 110.68(11) |
| C(53)-Fe(1)-S(11)  | 162.90(9)  |
| C(33)-Fe(1)-S(11)  | 93.83(11)  |
| C(43)-Fe(1)-S(11)  | 124.18(10) |
| C(63)-Fe(1)-S(21)  | 86.28(8)   |
| C(23)-Fe(1)-S(21)  | 146.61(10) |
| C(13)-Fe(1)-S(21)  | 108.34(8)  |
| C(53)-Fe(1)-S(21)  | 95.63(8)   |
| C(33)-Fe(1)-S(21)  | 165.81(12) |
| C(43)-Fe(1)-S(21)  | 127.02(10) |
| S(11)-Fe(1)-S(21)  | 98.87(4)   |
| C(63)-Fe(1)-K(1)#1 | 141.99(8)  |
| C(23)-Fe(1)-K(1)#1 | 144.47(10) |
| C(13)-Fe(1)-K(1)#1 | 159.29(10) |
| C(53)-Fe(1)-K(1)#1 | 122.07(9)  |
| C(33)-Fe(1)-K(1)#1 | 124.09(10) |
| C(43)-Fe(1)-K(1)#1 | 115.05(9)  |
| S(11)-Fe(1)-K(1)#1 | 59.88(3)   |
| S(21)-Fe(1)-K(1)#1 | 58.92(3)   |
| C(11)-S(11)-Fe(1)  | 99.05(13)  |
| C(11)-S(11)-K(1)#1 | 177.72(12) |
| Fe(1)-S(11)-K(1)#1 | 82.66(3)   |
| C(12)-S(21)-Fe(1)  | 99.89(9)   |
| C(12)-S(21)-K(1)#1 | 169.99(13) |
| Fe(1)-S(21)-K(1)#1 | 83.49(3)   |
| C(61)-C(11)-C(21)  | 120.1(3)   |
| C(61)-C(11)-S(11)  | 121.5(3)   |
| C(21)-C(11)-S(11)  | 118.2(3)   |
| C(31)-C(21)-C(11)  | 117.8(4)   |
| C(31)-C(21)-C(23)  | 123.1(3)   |
| C(11)-C(21)-C(23)  | 118.9(3)   |
| C(41)-C(31)-F(71)  | 119.0(3)   |
| C(41)-C(31)-C(21)  | 124.1(3)   |
| F(71)-C(31)-C(21)  | 116.9(3)   |
| C(31)-C(41)-C(51)  | 117.2(3)   |
| C(31)-C(41)-H(41)  | 121.4      |
| C(51)-C(41)-H(41)  | 121.4      |
| C(41)-C(51)-C(61)  | 122.2(4)   |
| C(41)-C(51)-H(51)  | 118.9      |
| C(61)-C(51)-H(51)  | 118.9      |
| C(11)-C(61)-C(51)  | 118.6(3)   |
| C(11)-C(61)-C(81)  | 121.7(3)   |
| C(51)-C(61)-C(81)  | 119.4(4)   |
| C(31)-F(71)-K(1)   | 133.94(15) |
| C(91)-C(81)-C(131) | 119.9(3)   |

|                      |           |
|----------------------|-----------|
| C(91)-C(81)-C(61)    | 121.4(3)  |
| C(131)-C(81)-C(61)   | 118.6(3)  |
| C(101)-C(91)-C(81)   | 119.2(3)  |
| C(101)-C(91)-C(141)  | 119.4(3)  |
| C(81)-C(91)-C(141)   | 121.3(3)  |
| C(91)-C(101)-C(111)  | 121.8(4)  |
| C(91)-C(101)-H(101)  | 119.1     |
| C(111)-C(101)-H(101) | 119.1     |
| C(121)-C(111)-C(101) | 118.2(4)  |
| C(121)-C(111)-C(17B) | 120.6(7)  |
| C(101)-C(111)-C(17B) | 121.1(7)  |
| C(121)-C(111)-C(17A) | 125.2(11) |
| C(101)-C(111)-C(17A) | 116.5(11) |
| C(111)-C(121)-C(131) | 122.2(3)  |
| C(111)-C(121)-H(121) | 118.9     |
| C(131)-C(121)-H(121) | 118.9     |
| C(121)-C(131)-C(81)  | 118.7(4)  |
| C(121)-C(131)-C(201) | 119.5(3)  |
| C(81)-C(131)-C(201)  | 121.8(4)  |
| C(91)-C(141)-C(161)  | 111.6(3)  |
| C(91)-C(141)-C(151)  | 111.1(4)  |
| C(161)-C(141)-C(151) | 110.6(4)  |
| C(91)-C(141)-H(141)  | 107.8     |
| C(161)-C(141)-H(141) | 107.8     |
| C(151)-C(141)-H(141) | 107.8     |
| C(141)-C(151)-H(15A) | 109.5     |
| C(141)-C(151)-H(15B) | 109.5     |
| H(15A)-C(151)-H(15B) | 109.5     |
| C(141)-C(151)-H(15C) | 109.5     |
| H(15A)-C(151)-H(15C) | 109.5     |
| H(15B)-C(151)-H(15C) | 109.5     |
| C(141)-C(161)-H(16A) | 109.5     |
| C(141)-C(161)-H(16B) | 109.5     |
| H(16A)-C(161)-H(16B) | 109.5     |
| C(141)-C(161)-H(16C) | 109.5     |
| H(16A)-C(161)-H(16C) | 109.5     |
| H(16B)-C(161)-H(16C) | 109.5     |
| C(111)-C(17A)-C(191) | 109.1(10) |
| C(111)-C(17A)-C(18A) | 113.0(12) |
| C(191)-C(17A)-C(18A) | 128.6(14) |
| C(111)-C(17A)-H(17A) | 100.1     |
| C(191)-C(17A)-H(17A) | 100.1     |
| C(18A)-C(17A)-H(17A) | 100.1     |
| C(17A)-C(18A)-H(18A) | 109.5     |
| C(17A)-C(18A)-H(18B) | 109.5     |
| H(18A)-C(18A)-H(18B) | 109.5     |
| C(17A)-C(18A)-H(18C) | 109.5     |
| H(18A)-C(18A)-H(18C) | 109.5     |
| H(18B)-C(18A)-H(18C) | 109.5     |
| C(191)-C(17B)-C(111) | 114.0(7)  |
| C(191)-C(17B)-C(18B) | 102.4(9)  |
| C(111)-C(17B)-C(18B) | 108.9(9)  |
| C(191)-C(17B)-H(17B) | 110.4     |
| C(111)-C(17B)-H(17B) | 110.4     |
| C(18B)-C(17B)-H(17B) | 110.4     |
| C(17B)-C(18B)-H(18D) | 109.5     |

|                      |          |
|----------------------|----------|
| C(17B)-C(18B)-H(18E) | 109.5    |
| H(18D)-C(18B)-H(18E) | 109.5    |
| C(17B)-C(18B)-H(18F) | 109.5    |
| H(18D)-C(18B)-H(18F) | 109.5    |
| H(18E)-C(18B)-H(18F) | 109.5    |
| C(17A)-C(191)-H(19A) | 109.5    |
| C(17A)-C(191)-H(19B) | 109.5    |
| H(19A)-C(191)-H(19B) | 109.5    |
| C(17A)-C(191)-H(19C) | 109.5    |
| H(19A)-C(191)-H(19C) | 109.5    |
| H(19B)-C(191)-H(19C) | 109.5    |
| C(17B)-C(191)-H(19D) | 109.5    |
| C(17B)-C(191)-H(19E) | 109.5    |
| H(19D)-C(191)-H(19E) | 109.5    |
| C(17B)-C(191)-H(19F) | 109.5    |
| H(19D)-C(191)-H(19F) | 109.5    |
| H(19E)-C(191)-H(19F) | 109.5    |
| C(131)-C(201)-C(221) | 111.5(4) |
| C(131)-C(201)-C(211) | 110.8(5) |
| C(221)-C(201)-C(211) | 110.2(4) |
| C(131)-C(201)-H(201) | 108.1    |
| C(221)-C(201)-H(201) | 108.1    |
| C(211)-C(201)-H(201) | 108.1    |
| C(201)-C(211)-H(21A) | 109.5    |
| C(201)-C(211)-H(21B) | 109.5    |
| H(21A)-C(211)-H(21B) | 109.5    |
| C(201)-C(211)-H(21C) | 109.5    |
| H(21A)-C(211)-H(21C) | 109.5    |
| H(21B)-C(211)-H(21C) | 109.5    |
| C(201)-C(221)-H(22A) | 109.5    |
| C(201)-C(221)-H(22B) | 109.5    |
| H(22A)-C(221)-H(22B) | 109.5    |
| C(201)-C(221)-H(22C) | 109.5    |
| H(22A)-C(221)-H(22C) | 109.5    |
| H(22B)-C(221)-H(22C) | 109.5    |
| C(62)-C(12)-C(22)    | 118.7(3) |
| C(62)-C(12)-S(21)    | 123.2(2) |
| C(22)-C(12)-S(21)    | 118.0(2) |
| C(32)-C(22)-C(12)    | 118.6(3) |
| C(32)-C(22)-C(63)    | 123.0(3) |
| C(12)-C(22)-C(63)    | 118.3(3) |
| C(42)-C(32)-C(22)    | 124.3(3) |
| C(42)-C(32)-F(72)    | 118.3(3) |
| C(22)-C(32)-F(72)    | 117.3(3) |
| C(32)-C(42)-C(52)    | 116.2(3) |
| C(32)-C(42)-H(42)    | 121.9    |
| C(52)-C(42)-H(42)    | 121.9    |
| C(62)-C(52)-C(42)    | 122.9(3) |
| C(62)-C(52)-H(52)    | 118.6    |
| C(42)-C(52)-H(52)    | 118.6    |
| C(52)-C(62)-C(12)    | 119.2(3) |
| C(52)-C(62)-C(82)    | 118.7(3) |
| C(12)-C(62)-C(82)    | 122.0(3) |
| C(32)-F(72)-K(1)     | 132.2(2) |
| C(132)-C(82)-C(92)   | 119.8(3) |
| C(132)-C(82)-C(62)   | 120.9(4) |

|                      |           |
|----------------------|-----------|
| C(92)-C(82)-C(62)    | 119.2(4)  |
| C(82)-C(92)-C(102)   | 119.1(4)  |
| C(82)-C(92)-C(142)   | 122.1(3)  |
| C(102)-C(92)-C(142)  | 118.8(3)  |
| C(112)-C(102)-C(92)  | 122.6(4)  |
| C(112)-C(102)-H(102) | 118.7     |
| C(92)-C(102)-H(102)  | 118.7     |
| C(102)-C(112)-C(122) | 117.9(3)  |
| C(102)-C(112)-C(172) | 120.4(4)  |
| C(122)-C(112)-C(172) | 121.7(5)  |
| C(112)-C(122)-C(132) | 121.7(4)  |
| C(112)-C(122)-H(122) | 119.1     |
| C(132)-C(122)-H(122) | 119.1     |
| C(82)-C(132)-C(122)  | 118.9(4)  |
| C(82)-C(132)-C(20D)  | 126.9(4)  |
| C(122)-C(132)-C(20D) | 113.9(5)  |
| C(82)-C(132)-C(20C)  | 112.0(6)  |
| C(122)-C(132)-C(20C) | 128.5(6)  |
| C(92)-C(142)-C(152)  | 111.7(3)  |
| C(92)-C(142)-C(162)  | 113.2(3)  |
| C(152)-C(142)-C(162) | 109.7(4)  |
| C(92)-C(142)-H(142)  | 107.3     |
| C(152)-C(142)-H(142) | 107.3     |
| C(162)-C(142)-H(142) | 107.3     |
| C(142)-C(152)-H(15D) | 109.5     |
| C(142)-C(152)-H(15E) | 109.5     |
| H(15D)-C(152)-H(15E) | 109.5     |
| C(142)-C(152)-H(15F) | 109.5     |
| H(15D)-C(152)-H(15F) | 109.5     |
| H(15E)-C(152)-H(15F) | 109.5     |
| C(142)-C(162)-H(16D) | 109.5     |
| C(142)-C(162)-H(16E) | 109.5     |
| H(16D)-C(162)-H(16E) | 109.5     |
| C(142)-C(162)-H(16F) | 109.5     |
| H(16D)-C(162)-H(16F) | 109.5     |
| H(16E)-C(162)-H(16F) | 109.5     |
| C(182)-C(172)-C(192) | 112.3(4)  |
| C(182)-C(172)-C(112) | 110.8(4)  |
| C(192)-C(172)-C(112) | 112.2(4)  |
| C(182)-C(172)-H(172) | 107.1     |
| C(192)-C(172)-H(172) | 107.1     |
| C(112)-C(172)-H(172) | 107.1     |
| C(172)-C(182)-H(18G) | 109.5     |
| C(172)-C(182)-H(18H) | 109.5     |
| H(18G)-C(182)-H(18H) | 109.5     |
| C(172)-C(182)-H(18I) | 109.5     |
| H(18G)-C(182)-H(18I) | 109.5     |
| H(18H)-C(182)-H(18I) | 109.5     |
| C(172)-C(192)-H(19G) | 109.5     |
| C(172)-C(192)-H(19H) | 109.5     |
| H(19G)-C(192)-H(19H) | 109.5     |
| C(172)-C(192)-H(19I) | 109.5     |
| H(19G)-C(192)-H(19I) | 109.5     |
| H(19H)-C(192)-H(19I) | 109.5     |
| C(222)-C(20C)-C(21C) | 111.5(10) |
| C(222)-C(20C)-C(132) | 112.7(8)  |

|                      |            |
|----------------------|------------|
| C(21C)-C(20C)-C(132) | 108.8(9)   |
| C(222)-C(20C)-H(20C) | 107.9      |
| C(21C)-C(20C)-H(20C) | 107.9      |
| C(132)-C(20C)-H(20C) | 107.9      |
| C(20C)-C(21C)-H(21D) | 109.5      |
| C(20C)-C(21C)-H(21E) | 109.5      |
| H(21D)-C(21C)-H(21E) | 109.5      |
| C(20C)-C(21C)-H(21F) | 109.5      |
| H(21D)-C(21C)-H(21F) | 109.5      |
| H(21E)-C(21C)-H(21F) | 109.5      |
| C(21D)-C(20D)-C(132) | 115.8(7)   |
| C(21D)-C(20D)-C(222) | 107.3(7)   |
| C(132)-C(20D)-C(222) | 109.3(6)   |
| C(21D)-C(20D)-H(20D) | 108.0      |
| C(132)-C(20D)-H(20D) | 108.0      |
| C(222)-C(20D)-H(20D) | 108.0      |
| C(20D)-C(21D)-H(21G) | 109.5      |
| C(20D)-C(21D)-H(21H) | 109.5      |
| H(21G)-C(21D)-H(21H) | 109.5      |
| C(20D)-C(21D)-H(21I) | 109.5      |
| H(21G)-C(21D)-H(21I) | 109.5      |
| H(21H)-C(21D)-H(21I) | 109.5      |
| C(20C)-C(222)-H(22G) | 109.5      |
| C(20C)-C(222)-H(22H) | 109.5      |
| H(22G)-C(222)-H(22H) | 109.5      |
| C(20C)-C(222)-H(22I) | 109.5      |
| H(22G)-C(222)-H(22I) | 109.5      |
| H(22H)-C(222)-H(22I) | 109.5      |
| C(20D)-C(222)-H(22D) | 109.5      |
| C(20D)-C(222)-H(22E) | 109.5      |
| H(22D)-C(222)-H(22E) | 109.5      |
| C(20D)-C(222)-H(22F) | 109.5      |
| H(22D)-C(222)-H(22F) | 109.5      |
| H(22E)-C(222)-H(22F) | 109.5      |
| C(63)-C(13)-C(23)    | 118.7(3)   |
| C(63)-C(13)-Fe(1)    | 68.43(18)  |
| C(23)-C(13)-Fe(1)    | 68.91(17)  |
| C(63)-C(13)-K(1)     | 106.4(2)   |
| C(23)-C(13)-K(1)     | 104.59(16) |
| Fe(1)-C(13)-K(1)     | 166.09(16) |
| C(63)-C(13)-H(13)    | 120.7      |
| C(23)-C(13)-H(13)    | 120.7      |
| Fe(1)-C(13)-H(13)    | 135.5      |
| K(1)-C(13)-H(13)     | 58.4       |
| C(33)-C(23)-C(13)    | 120.2(3)   |
| C(33)-C(23)-C(21)    | 119.3(3)   |
| C(13)-C(23)-C(21)    | 118.1(3)   |
| C(33)-C(23)-Fe(1)    | 71.80(16)  |
| C(13)-C(23)-Fe(1)    | 70.59(15)  |
| C(21)-C(23)-Fe(1)    | 114.7(2)   |
| C(43)-C(33)-C(23)    | 121.0(3)   |
| C(43)-C(33)-Fe(1)    | 72.47(16)  |
| C(23)-C(33)-Fe(1)    | 68.13(16)  |
| C(43)-C(33)-H(33)    | 119.5      |
| C(23)-C(33)-H(33)    | 119.5      |
| Fe(1)-C(33)-H(33)    | 133.2      |

|                      |           |
|----------------------|-----------|
| C(53)-C(43)-C(33)    | 118.4(3)  |
| C(53)-C(43)-Fe(1)    | 67.8(2)   |
| C(33)-C(43)-Fe(1)    | 68.6(2)   |
| C(53)-C(43)-H(43)    | 120.8     |
| C(33)-C(43)-H(43)    | 120.8     |
| Fe(1)-C(43)-H(43)    | 136.4     |
| C(43)-C(53)-C(63)    | 121.3(3)  |
| C(43)-C(53)-Fe(1)    | 73.4(2)   |
| C(63)-C(53)-Fe(1)    | 68.0(2)   |
| C(43)-C(53)-H(53)    | 119.3     |
| C(63)-C(53)-H(53)    | 119.3     |
| Fe(1)-C(53)-H(53)    | 132.3     |
| C(13)-C(63)-C(53)    | 120.2(3)  |
| C(13)-C(63)-C(22)    | 119.2(3)  |
| C(53)-C(63)-C(22)    | 118.7(3)  |
| C(13)-C(63)-Fe(1)    | 71.42(19) |
| C(53)-C(63)-Fe(1)    | 71.3(2)   |
| C(22)-C(63)-Fe(1)    | 116.3(2)  |
| O(60)-K(1)-O(10)     | 148.62(9) |
| O(60)-K(1)-F(71)     | 81.69(9)  |
| O(10)-K(1)-F(71)     | 115.40(8) |
| O(60)-K(1)-F(72)     | 78.55(9)  |
| O(10)-K(1)-F(72)     | 70.08(7)  |
| F(71)-K(1)-F(72)     | 124.42(5) |
| O(60)-K(1)-S(21)#2   | 94.57(8)  |
| O(10)-K(1)-S(21)#2   | 84.42(7)  |
| F(71)-K(1)-S(21)#2   | 146.86(5) |
| F(72)-K(1)-S(21)#2   | 86.40(4)  |
| O(60)-K(1)-S(11)#2   | 99.67(8)  |
| O(10)-K(1)-S(11)#2   | 108.10(6) |
| F(71)-K(1)-S(11)#2   | 83.04(4)  |
| F(72)-K(1)-S(11)#2   | 151.26(5) |
| S(21)#2-K(1)-S(11)#2 | 65.04(3)  |
| O(60)-K(1)-C(13)     | 68.56(10) |
| O(10)-K(1)-C(13)     | 95.16(9)  |
| F(71)-K(1)-C(13)     | 62.51(6)  |
| F(72)-K(1)-C(13)     | 61.91(7)  |
| S(21)#2-K(1)-C(13)   | 145.95(6) |
| S(11)#2-K(1)-C(13)   | 144.46(7) |
| C(50)-O(10)-C(20)    | 107.6(4)  |
| C(50)-O(10)-K(1)     | 113.7(3)  |
| C(20)-O(10)-K(1)     | 134.2(3)  |
| O(10)-C(20)-C(30)    | 107.7(3)  |
| O(10)-C(20)-H(20A)   | 110.2     |
| C(30)-C(20)-H(20A)   | 110.2     |
| O(10)-C(20)-H(20B)   | 110.2     |
| C(30)-C(20)-H(20B)   | 110.2     |
| H(20A)-C(20)-H(20B)  | 108.5     |
| C(40)-C(30)-C(20)    | 102.8(5)  |
| C(40)-C(30)-H(30A)   | 111.2     |
| C(20)-C(30)-H(30A)   | 111.2     |
| C(40)-C(30)-H(30B)   | 111.2     |
| C(20)-C(30)-H(30B)   | 111.2     |
| H(30A)-C(30)-H(30B)  | 109.1     |
| C(30)-C(40)-C(50)    | 102.9(4)  |
| C(30)-C(40)-H(40A)   | 111.2     |



|                      |           |
|----------------------|-----------|
| C(50)-C(40)-H(40A)   | 111.2     |
| C(30)-C(40)-H(40B)   | 111.2     |
| C(50)-C(40)-H(40B)   | 111.2     |
| H(40A)-C(40)-H(40B)  | 109.1     |
| O(10)-C(50)-C(40)    | 104.2(4)  |
| O(10)-C(50)-K(1)     | 44.5(2)   |
| C(40)-C(50)-K(1)     | 127.0(3)  |
| O(10)-C(50)-H(50A)   | 110.9     |
| C(40)-C(50)-H(50A)   | 110.9     |
| K(1)-C(50)-H(50A)    | 67.0      |
| O(10)-C(50)-H(50B)   | 110.9     |
| C(40)-C(50)-H(50B)   | 110.9     |
| K(1)-C(50)-H(50B)    | 119.7     |
| H(50A)-C(50)-H(50B)  | 108.9     |
| C(10F)-O(60)-C(7F)   | 106.1(10) |
| C(10E)-O(60)-C(7E)   | 117.1(19) |
| C(10F)-O(60)-K(1)    | 126.8(8)  |
| C(7F)-O(60)-K(1)     | 126.9(5)  |
| C(10E)-O(60)-K(1)    | 114.6(15) |
| C(7E)-O(60)-K(1)     | 124.2(14) |
| O(60)-C(7E)-C(8E)    | 105(2)    |
| O(60)-C(7E)-H(7EA)   | 110.8     |
| C(8E)-C(7E)-H(7EA)   | 110.8     |
| O(60)-C(7E)-H(7EB)   | 110.8     |
| C(8E)-C(7E)-H(7EB)   | 110.8     |
| H(7EA)-C(7E)-H(7EB)  | 108.8     |
| C(7E)-C(8E)-C(9E)    | 99(2)     |
| C(7E)-C(8E)-H(8EA)   | 111.9     |
| C(9E)-C(8E)-H(8EA)   | 111.9     |
| C(7E)-C(8E)-H(8EB)   | 111.9     |
| C(9E)-C(8E)-H(8EB)   | 111.9     |
| H(8EA)-C(8E)-H(8EB)  | 109.6     |
| C(10E)-C(9E)-C(8E)   | 114(3)    |
| C(10E)-C(9E)-H(9EA)  | 108.8     |
| C(8E)-C(9E)-H(9EA)   | 108.8     |
| C(10E)-C(9E)-H(9EB)  | 108.8     |
| C(8E)-C(9E)-H(9EB)   | 108.8     |
| H(9EA)-C(9E)-H(9EB)  | 107.7     |
| O(60)-C(10E)-C(9E)   | 93(3)     |
| O(60)-C(10E)-K(1)    | 43.6(11)  |
| C(9E)-C(10E)-K(1)    | 136.3(19) |
| O(60)-C(10E)-H(10A)  | 113.1     |
| C(9E)-C(10E)-H(10A)  | 113.1     |
| K(1)-C(10E)-H(10A)   | 86.8      |
| O(60)-C(10E)-H(10B)  | 113.1     |
| C(9E)-C(10E)-H(10B)  | 113.1     |
| K(1)-C(10E)-H(10B)   | 93.3      |
| H(10A)-C(10E)-H(10B) | 110.5     |
| O(60)-C(7F)-C(8F)    | 108.8(10) |
| O(60)-C(7F)-H(7FA)   | 109.9     |
| C(8F)-C(7F)-H(7FA)   | 109.9     |
| O(60)-C(7F)-H(7FB)   | 109.9     |
| C(8F)-C(7F)-H(7FB)   | 109.9     |
| H(7FA)-C(7F)-H(7FB)  | 108.3     |
| C(7F)-C(8F)-C(9F)    | 105.2(15) |
| C(7F)-C(8F)-H(8FA)   | 110.7     |

|                      |           |
|----------------------|-----------|
| C(9F)-C(8F)-H(8FA)   | 110.7     |
| C(7F)-C(8F)-H(8FB)   | 110.7     |
| C(9F)-C(8F)-H(8FB)   | 110.7     |
| H(8FA)-C(8F)-H(8FB)  | 108.8     |
| C(10F)-C(9F)-C(8F)   | 101.3(17) |
| C(10F)-C(9F)-H(9FA)  | 111.5     |
| C(8F)-C(9F)-H(9FA)   | 111.5     |
| C(10F)-C(9F)-H(9FB)  | 111.5     |
| C(8F)-C(9F)-H(9FB)   | 111.5     |
| H(9FA)-C(9F)-H(9FB)  | 109.3     |
| O(60)-C(10F)-C(9F)   | 109.3(11) |
| O(60)-C(10F)-H(10C)  | 109.8     |
| C(9F)-C(10F)-H(10C)  | 109.8     |
| O(60)-C(10F)-H(10D)  | 109.8     |
| C(9F)-C(10F)-H(10D)  | 109.8     |
| H(10C)-C(10F)-H(10D) | 108.3     |

Symmetry transformations used to generate equivalent atoms:

#1 x+1,y,z #2 x-1,y,z

**Anisotropic displacement parameters ( $\text{\AA}^2 \times 10^3$ ) for LFeK (2). The anisotropic displacement factor exponent takes the form:  $-2\pi^2 [ h^2 a^{*2} U^{11} + \dots + 2 h k a^* b^* U^{12} ]$**

|        | U <sup>11</sup> | U <sup>22</sup> | U <sup>33</sup> | U <sup>23</sup> | U <sup>13</sup> | U <sup>12</sup> |
|--------|-----------------|-----------------|-----------------|-----------------|-----------------|-----------------|
| Fe(1)  | 24(1)           | 21(1)           | 24(1)           | -10(1)          | -5(1)           | 1(1)            |
| S(11)  | 25(1)           | 39(1)           | 38(1)           | -26(1)          | -6(1)           | 2(1)            |
| S(21)  | 25(1)           | 22(1)           | 36(1)           | -9(1)           | -7(1)           | 2(1)            |
| C(11)  | 27(1)           | 20(1)           | 27(2)           | -5(1)           | 0(2)            | -1(1)           |
| C(21)  | 30(2)           | 21(1)           | 26(2)           | -9(1)           | -6(2)           | 3(1)            |
| C(31)  | 32(2)           | 22(1)           | 26(2)           | -8(1)           | -7(2)           | 4(1)            |
| C(41)  | 28(2)           | 29(2)           | 33(2)           | -11(2)          | -6(2)           | 6(1)            |
| C(51)  | 41(2)           | 23(1)           | 26(2)           | -12(1)          | -4(2)           | 4(1)            |
| C(61)  | 28(1)           | 20(1)           | 26(2)           | -10(1)          | -2(2)           | 2(1)            |
| F(71)  | 27(1)           | 38(1)           | 40(1)           | -18(1)          | -11(1)          | 7(1)            |
| C(81)  | 32(2)           | 24(1)           | 23(2)           | -13(1)          | -6(2)           | 7(1)            |
| C(91)  | 29(2)           | 25(2)           | 28(2)           | -10(2)          | -4(2)           | 5(1)            |
| C(101) | 32(2)           | 34(2)           | 39(2)           | -22(2)          | -9(2)           | 6(1)            |
| C(111) | 35(2)           | 47(2)           | 26(2)           | -18(2)          | -9(2)           | 17(2)           |
| C(121) | 42(2)           | 38(2)           | 24(2)           | -1(2)           | -6(2)           | 8(2)            |
| C(131) | 46(2)           | 27(2)           | 32(2)           | -3(2)           | -3(2)           | 4(2)            |
| C(141) | 43(2)           | 24(2)           | 48(3)           | -6(2)           | -18(2)          | -1(1)           |
| C(151) | 102(4)          | 21(2)           | 88(5)           | -6(2)           | 16(4)           | 16(2)           |
| C(161) | 64(2)           | 47(2)           | 28(2)           | -1(2)           | -8(2)           | -3(2)           |
| C(17A) | 36(9)           | 79(9)           | 28(10)          | -20(8)          | -13(8)          | 12(7)           |
| C(18A) | 42(7)           | 102(12)         | 50(10)          | -42(9)          | -4(6)           | -8(7)           |
| C(17B) | 41(5)           | 75(6)           | 43(6)           | -35(5)          | -24(5)          | 25(4)           |
| C(18B) | 51(4)           | 106(8)          | 47(5)           | -48(5)          | -26(4)          | 27(4)           |
| C(191) | 56(2)           | 83(3)           | 73(4)           | -16(3)          | -37(3)          | 15(2)           |
| C(201) | 66(3)           | 32(2)           | 65(4)           | 11(2)           | -16(3)          | -8(2)           |
| C(211) | 53(2)           | 66(3)           | 89(5)           | 31(3)           | 5(3)            | -1(2)           |

|        |         |         |         |         |         |         |
|--------|---------|---------|---------|---------|---------|---------|
| C(221) | 108(4)  | 31(2)   | 125(7)  | -4(3)   | -9(4)   | -9(2)   |
| C(12)  | 27(1)   | 20(1)   | 25(2)   | -6(1)   | -1(2)   | -2(1)   |
| C(22)  | 30(2)   | 22(1)   | 22(2)   | -11(1)  | -4(2)   | 3(1)    |
| C(32)  | 26(2)   | 31(2)   | 34(2)   | -15(2)  | -8(2)   | 3(1)    |
| C(42)  | 35(2)   | 26(2)   | 39(2)   | -15(2)  | -1(2)   | -7(1)   |
| C(52)  | 41(2)   | 22(1)   | 36(2)   | -9(2)   | 1(2)    | -1(1)   |
| C(62)  | 33(2)   | 22(1)   | 22(2)   | -7(1)   | 2(2)    | 1(1)    |
| F(72)  | 28(1)   | 31(1)   | 57(2)   | -16(1)  | -14(1)  | 1(1)    |
| C(82)  | 37(2)   | 17(1)   | 33(2)   | -7(1)   | -7(2)   | 3(1)    |
| C(92)  | 30(2)   | 18(1)   | 34(2)   | -9(1)   | -10(2)  | 1(1)    |
| C(102) | 34(2)   | 24(2)   | 41(3)   | -14(2)  | -14(2)  | 6(1)    |
| C(112) | 59(2)   | 24(2)   | 50(3)   | -17(2)  | -26(2)  | 9(2)    |
| C(122) | 98(3)   | 37(2)   | 30(2)   | -14(2)  | -29(3)  | 27(2)   |
| C(132) | 82(3)   | 30(2)   | 28(2)   | -6(2)   | -10(2)  | 24(2)   |
| C(142) | 30(2)   | 26(2)   | 30(2)   | -10(2)  | -4(2)   | 5(1)    |
| C(152) | 47(2)   | 37(2)   | 40(3)   | -16(2)  | -14(2)  | 2(2)    |
| C(162) | 54(2)   | 62(2)   | 41(3)   | -16(2)  | 7(2)    | -22(2)  |
| C(172) | 64(2)   | 39(2)   | 65(4)   | -20(2)  | -42(3)  | 16(2)   |
| C(182) | 66(3)   | 38(2)   | 89(5)   | -26(2)  | -41(3)  | 20(2)   |
| C(192) | 87(3)   | 34(2)   | 64(4)   | -4(2)   | -52(3)  | -7(2)   |
| C(20C) | 77(7)   | 48(5)   | 28(5)   | -24(4)  | -23(5)  | 11(5)   |
| C(21C) | 80(8)   | 68(6)   | 61(9)   | -42(6)  | 19(7)   | -19(5)  |
| C(20D) | 68(5)   | 46(4)   | 22(4)   | -13(3)  | -21(4)  | 30(3)   |
| C(21D) | 68(5)   | 56(4)   | 41(5)   | -23(4)  | 3(4)    | 4(4)    |
| C(222) | 57(3)   | 82(3)   | 83(4)   | -29(3)  | -7(3)   | -10(2)  |
| C(13)  | 21(1)   | 22(1)   | 26(2)   | -10(1)  | -6(1)   | 1(1)    |
| C(23)  | 26(1)   | 22(1)   | 24(2)   | -9(1)   | -7(2)   | 3(1)    |
| C(33)  | 35(2)   | 20(1)   | 26(2)   | -8(1)   | -7(2)   | 3(1)    |
| C(43)  | 33(2)   | 26(2)   | 20(2)   | -5(1)   | -6(2)   | 1(1)    |
| C(53)  | 32(2)   | 25(1)   | 24(2)   | -12(1)  | -5(2)   | -1(1)   |
| C(63)  | 25(1)   | 22(1)   | 22(2)   | -8(1)   | -6(2)   | 1(1)    |
| K(1)   | 34(1)   | 63(1)   | 61(1)   | -32(1)  | -10(1)  | -1(1)   |
| O(10)  | 43(1)   | 41(1)   | 55(2)   | -10(1)  | -14(2)  | -2(1)   |
| C(20)  | 37(2)   | 52(2)   | 51(3)   | -21(2)  | -2(2)   | -2(2)   |
| C(30)  | 58(2)   | 52(2)   | 53(3)   | -13(2)  | 11(3)   | -7(2)   |
| C(40)  | 53(2)   | 90(4)   | 46(3)   | 6(3)    | 5(2)    | 28(3)   |
| C(50)  | 34(2)   | 71(3)   | 60(4)   | 16(3)   | -17(2)  | -13(2)  |
| O(60)  | 66(2)   | 52(2)   | 62(3)   | -25(2)  | 6(2)    | -12(1)  |
| C(7E)  | 260(40) | 95(14)  | 85(18)  | -33(12) | 20(20)  | -12(17) |
| C(8E)  | 190(20) | 80(13)  | 83(14)  | -24(9)  | 25(14)  | -30(12) |
| C(9E)  | 240(30) | 111(16) | 130(19) | -63(13) | 0(20)   | 12(18)  |
| C(10E) | 141(17) | 72(14)  | 93(15)  | -29(10) | 58(14)  | -65(12) |
| C(7F)  | 49(6)   | 42(5)   | 44(6)   | -26(4)  | 15(4)   | -21(3)  |
| C(8F)  | 280(30) | 49(7)   | 85(11)  | -26(6)  | -74(15) | 4(8)    |
| C(9F)  | 370(30) | 42(6)   | 44(8)   | -7(5)   | -33(10) | -44(9)  |
| C(10F) | 210(20) | 38(7)   | 45(7)   | -22(5)  | -27(9)  | 8(8)    |

---

**Hydrogen coordinates (  $\times 10^4$ ) and isotropic displacement parameters ( $\text{\AA}^2 \times 10^3$ )  
for LFeK (2).**

|        | x     | y     | z     | U(eq) |
|--------|-------|-------|-------|-------|
| H(41)  | -642  | 10140 | 7818  | 36    |
| H(51)  | 1483  | 10202 | 8371  | 35    |
| H(101) | 6872  | 10783 | 8366  | 39    |
| H(121) | 5925  | 8217  | 9603  | 45    |
| H(141) | 4147  | 11102 | 7096  | 47    |
| H(15A) | 3481  | 11903 | 7908  | 116   |
| H(15B) | 4312  | 12563 | 7165  | 116   |
| H(15C) | 5185  | 12111 | 7887  | 116   |
| H(16A) | 7127  | 11562 | 7066  | 74    |
| H(16B) | 6137  | 11890 | 6382  | 74    |
| H(16C) | 6713  | 10845 | 6722  | 74    |
| H(17A) | 8498  | 9929  | 9130  | 57    |
| H(18A) | 6882  | 10696 | 9723  | 91    |
| H(18B) | 8213  | 10206 | 10223 | 91    |
| H(18C) | 6606  | 9791  | 10424 | 91    |
| H(17B) | 8380  | 9988  | 9348  | 59    |
| H(18D) | 6461  | 9904  | 10326 | 94    |
| H(18E) | 7808  | 9212  | 10684 | 94    |
| H(18F) | 6369  | 8835  | 10514 | 94    |
| H(19A) | 9602  | 8610  | 9999  | 109   |
| H(19B) | 8192  | 8085  | 9980  | 109   |
| H(19C) | 9262  | 8520  | 9243  | 109   |
| H(19D) | 9555  | 8608  | 10024 | 109   |
| H(19E) | 8231  | 8058  | 9946  | 109   |
| H(19F) | 9320  | 8569  | 9236  | 109   |
| H(201) | 2904  | 8128  | 8605  | 73    |
| H(21A) | 3495  | 7679  | 10107 | 130   |
| H(21B) | 2205  | 7260  | 9857  | 130   |
| H(21C) | 2115  | 8323  | 9734  | 130   |
| H(22A) | 5177  | 7273  | 8467  | 142   |
| H(22B) | 3967  | 6639  | 9038  | 142   |
| H(22C) | 5303  | 6961  | 9334  | 142   |
| H(42)  | 755   | 4706  | 6576  | 39    |
| H(52)  | 3064  | 4008  | 6977  | 40    |
| H(102) | 8709  | 3766  | 6570  | 38    |
| H(122) | 7131  | 3620  | 8612  | 66    |
| H(142) | 5714  | 5235  | 5676  | 35    |
| H(15D) | 7070  | 3519  | 5688  | 60    |
| H(15E) | 6318  | 4239  | 4993  | 60    |
| H(15F) | 5316  | 3783  | 5750  | 60    |
| H(16D) | 8197  | 5725  | 5530  | 78    |
| H(16E) | 7772  | 5553  | 4820  | 78    |
| H(16F) | 8819  | 4815  | 5377  | 78    |
| H(172) | 10309 | 3118  | 7477  | 64    |
| H(18G) | 8416  | 1946  | 8602  | 93    |
| H(18H) | 10150 | 1693  | 8439  | 93    |
| H(18I) | 9026  | 1846  | 7828  | 93    |
| H(19G) | 10468 | 3976  | 8209  | 91    |
| H(19H) | 11111 | 2957  | 8617  | 91    |

|        |       |       |      |     |
|--------|-------|-------|------|-----|
| H(19I) | 9479  | 3291  | 8876 | 91  |
| H(20C) | 3344  | 4631  | 7975 | 57  |
| H(21D) | 5232  | 5212  | 8755 | 99  |
| H(21E) | 3454  | 5297  | 8910 | 99  |
| H(21F) | 4243  | 5838  | 8112 | 99  |
| H(20D) | 3869  | 5029  | 8188 | 55  |
| H(21G) | 6028  | 4388  | 9234 | 82  |
| H(21H) | 4570  | 5036  | 9287 | 82  |
| H(21I) | 5905  | 5408  | 8660 | 82  |
| H(22G) | 3720  | 3172  | 8754 | 110 |
| H(22H) | 4562  | 3523  | 9268 | 110 |
| H(22I) | 2826  | 3797  | 9177 | 110 |
| H(22D) | 3308  | 3448  | 8609 | 110 |
| H(22E) | 4504  | 3209  | 9201 | 110 |
| H(22F) | 3028  | 3836  | 9272 | 110 |
| H(13)  | 1148  | 7702  | 6847 | 27  |
| H(33)  | 3041  | 10025 | 5410 | 32  |
| H(43)  | 3990  | 9251  | 4590 | 33  |
| H(53)  | 3674  | 7681  | 4952 | 31  |
| H(20A) | -3477 | 8488  | 4302 | 55  |
| H(20B) | -3269 | 7448  | 4838 | 55  |
| H(30A) | -1920 | 7194  | 3892 | 68  |
| H(30B) | -1784 | 8267  | 3444 | 68  |
| H(40A) | 586   | 7898  | 3765 | 89  |
| H(40B) | 73    | 7099  | 4522 | 89  |
| H(50A) | 387   | 8256  | 4937 | 76  |
| H(50B) | -295  | 9019  | 4232 | 76  |
| H(7EA) | -2180 | 7617  | 8403 | 179 |
| H(7EB) | -428  | 7796  | 8249 | 179 |
| H(8EA) | -1769 | 6322  | 9318 | 144 |
| H(8EB) | -73   | 6603  | 9254 | 144 |
| H(9EA) | 767   | 5864  | 8487 | 188 |
| H(9EB) | -570  | 5236  | 8924 | 188 |
| H(10A) | -343  | 5851  | 7526 | 125 |
| H(10B) | -2004 | 5817  | 7961 | 125 |
| H(7FA) | -1821 | 7640  | 8435 | 51  |
| H(7FB) | -98   | 7791  | 8137 | 51  |
| H(8FA) | -935  | 6619  | 9403 | 160 |
| H(8FB) | 666   | 6524  | 8963 | 160 |
| H(9FA) | -208  | 5210  | 9032 | 181 |
| H(9FB) | -1925 | 5607  | 9046 | 181 |
| H(10C) | 216   | 5882  | 7817 | 115 |
| H(10D) | -1536 | 5763  | 7854 | 115 |

---

**Torsion angles [°] for LFeK (2).**

---

|                             |            |
|-----------------------------|------------|
| Fe(1)-S(11)-C(11)-C(61)     | 166.0(2)   |
| Fe(1)-S(11)-C(11)-C(21)     | -8.1(3)    |
| C(61)-C(11)-C(21)-C(31)     | -2.0(5)    |
| S(11)-C(11)-C(21)-C(31)     | 172.2(2)   |
| C(61)-C(11)-C(21)-C(23)     | -176.7(3)  |
| S(11)-C(11)-C(21)-C(23)     | -2.4(4)    |
| C(11)-C(21)-C(31)-C(41)     | 2.8(5)     |
| C(23)-C(21)-C(31)-C(41)     | 177.2(3)   |
| C(11)-C(21)-C(31)-F(71)     | -176.4(3)  |
| C(23)-C(21)-C(31)-F(71)     | -2.0(4)    |
| F(71)-C(31)-C(41)-C(51)     | 177.9(3)   |
| C(21)-C(31)-C(41)-C(51)     | -1.2(5)    |
| C(31)-C(41)-C(51)-C(61)     | -1.1(5)    |
| C(21)-C(11)-C(61)-C(51)     | -0.2(5)    |
| S(11)-C(11)-C(61)-C(51)     | -174.2(2)  |
| C(21)-C(11)-C(61)-C(81)     | 174.3(3)   |
| S(11)-C(11)-C(61)-C(81)     | 0.3(4)     |
| C(41)-C(51)-C(61)-C(11)     | 1.8(5)     |
| C(41)-C(51)-C(61)-C(81)     | -172.8(3)  |
| C(41)-C(31)-F(71)-K(1)      | -128.9(3)  |
| C(21)-C(31)-F(71)-K(1)      | 50.3(4)    |
| C(11)-C(61)-C(81)-C(91)     | 96.4(4)    |
| C(51)-C(61)-C(81)-C(91)     | -89.1(4)   |
| C(11)-C(61)-C(81)-C(131)    | -85.6(4)   |
| C(51)-C(61)-C(81)-C(131)    | 88.8(4)    |
| C(131)-C(81)-C(91)-C(101)   | -1.5(5)    |
| C(61)-C(81)-C(91)-C(101)    | 176.4(3)   |
| C(131)-C(81)-C(91)-C(141)   | 176.0(4)   |
| C(61)-C(81)-C(91)-C(141)    | -6.1(5)    |
| C(81)-C(91)-C(101)-C(111)   | 1.2(6)     |
| C(141)-C(91)-C(101)-C(111)  | -176.3(4)  |
| C(91)-C(101)-C(111)-C(121)  | -0.4(6)    |
| C(91)-C(101)-C(111)-C(17B)  | -178.0(6)  |
| C(91)-C(101)-C(111)-C(17A)  | -177.7(10) |
| C(101)-C(111)-C(121)-C(131) | -0.2(6)    |
| C(17B)-C(111)-C(121)-C(131) | 177.4(6)   |
| C(17A)-C(111)-C(121)-C(131) | 176.8(10)  |
| C(111)-C(121)-C(131)-C(81)  | -0.1(6)    |
| C(111)-C(121)-C(131)-C(201) | -178.6(4)  |
| C(91)-C(81)-C(131)-C(121)   | 0.9(6)     |
| C(61)-C(81)-C(131)-C(121)   | -177.0(3)  |
| C(91)-C(81)-C(131)-C(201)   | 179.4(4)   |
| C(61)-C(81)-C(131)-C(201)   | 1.4(6)     |
| C(101)-C(91)-C(141)-C(161)  | 57.6(5)    |
| C(81)-C(91)-C(141)-C(161)   | -119.9(4)  |
| C(101)-C(91)-C(141)-C(151)  | -66.3(5)   |
| C(81)-C(91)-C(141)-C(151)   | 116.2(4)   |
| C(121)-C(111)-C(17A)-C(191) | 45(2)      |
| C(101)-C(111)-C(17A)-C(191) | -137.7(13) |
| C(121)-C(111)-C(17A)-C(18A) | -104.6(17) |
| C(101)-C(111)-C(17A)-C(18A) | 72(2)      |
| C(121)-C(111)-C(17B)-C(191) | 49.4(13)   |
| C(101)-C(111)-C(17B)-C(191) | -133.1(9)  |
| C(121)-C(111)-C(17B)-C(18B) | -64.2(9)   |

|                             |           |
|-----------------------------|-----------|
| C(101)-C(111)-C(17B)-C(18B) | 113.3(9)  |
| C(121)-C(131)-C(201)-C(221) | -59.6(7)  |
| C(81)-C(131)-C(201)-C(221)  | 122.0(5)  |
| C(121)-C(131)-C(201)-C(211) | 63.5(5)   |
| C(81)-C(131)-C(201)-C(211)  | -115.0(5) |
| Fe(1)-S(21)-C(12)-C(62)     | -173.3(3) |
| K(1)#1-S(21)-C(12)-C(62)    | 77.7(7)   |
| Fe(1)-S(21)-C(12)-C(22)     | 2.6(3)    |
| K(1)#1-S(21)-C(12)-C(22)    | -106.4(5) |
| C(62)-C(12)-C(22)-C(32)     | 3.4(6)    |
| S(21)-C(12)-C(22)-C(32)     | -172.8(3) |
| C(62)-C(12)-C(22)-C(63)     | -178.7(3) |
| S(21)-C(12)-C(22)-C(63)     | 5.1(5)    |
| C(12)-C(22)-C(32)-C(42)     | -2.1(6)   |
| C(63)-C(22)-C(32)-C(42)     | -179.9(4) |
| C(12)-C(22)-C(32)-F(72)     | 176.4(3)  |
| C(63)-C(22)-C(32)-F(72)     | -1.4(6)   |
| C(22)-C(32)-C(42)-C(52)     | -0.4(7)   |
| F(72)-C(32)-C(42)-C(52)     | -178.9(4) |
| C(32)-C(42)-C(52)-C(62)     | 1.7(7)    |
| C(42)-C(52)-C(62)-C(12)     | -0.4(6)   |
| C(42)-C(52)-C(62)-C(82)     | 177.9(4)  |
| C(22)-C(12)-C(62)-C(52)     | -2.2(6)   |
| S(21)-C(12)-C(62)-C(52)     | 173.8(3)  |
| C(22)-C(12)-C(62)-C(82)     | 179.5(4)  |
| S(21)-C(12)-C(62)-C(82)     | -4.5(6)   |
| C(42)-C(32)-F(72)-K(1)      | 129.6(3)  |
| C(22)-C(32)-F(72)-K(1)      | -49.1(5)  |
| C(52)-C(62)-C(82)-C(132)    | -82.4(5)  |
| C(12)-C(62)-C(82)-C(132)    | 95.9(5)   |
| C(52)-C(62)-C(82)-C(92)     | 93.5(4)   |
| C(12)-C(62)-C(82)-C(92)     | -88.2(5)  |
| C(132)-C(82)-C(92)-C(102)   | 1.4(5)    |
| C(62)-C(82)-C(92)-C(102)    | -174.6(3) |
| C(132)-C(82)-C(92)-C(142)   | 179.8(4)  |
| C(62)-C(82)-C(92)-C(142)    | 3.9(5)    |
| C(82)-C(92)-C(102)-C(112)   | -2.6(5)   |
| C(142)-C(92)-C(102)-C(112)  | 178.9(3)  |
| C(92)-C(102)-C(112)-C(122)  | 1.2(6)    |
| C(92)-C(102)-C(112)-C(172)  | -179.5(3) |
| C(102)-C(112)-C(122)-C(132) | 1.4(7)    |
| C(172)-C(112)-C(122)-C(132) | -177.9(4) |
| C(92)-C(82)-C(132)-C(122)   | 1.1(6)    |
| C(62)-C(82)-C(132)-C(122)   | 177.0(4)  |
| C(92)-C(82)-C(132)-C(20D)   | 173.5(6)  |
| C(62)-C(82)-C(132)-C(20D)   | -10.6(8)  |
| C(92)-C(82)-C(132)-C(20C)   | -170.5(5) |
| C(62)-C(82)-C(132)-C(20C)   | 5.4(7)    |
| C(112)-C(122)-C(132)-C(82)  | -2.5(7)   |
| C(112)-C(122)-C(132)-C(20D) | -176.0(5) |
| C(112)-C(122)-C(132)-C(20C) | 167.4(7)  |
| C(82)-C(92)-C(142)-C(152)   | -105.9(4) |
| C(102)-C(92)-C(142)-C(152)  | 72.5(4)   |
| C(82)-C(92)-C(142)-C(162)   | 129.6(4)  |
| C(102)-C(92)-C(142)-C(162)  | -52.0(4)  |
| C(102)-C(112)-C(172)-C(182) | -99.6(6)  |

|                             |             |
|-----------------------------|-------------|
| C(122)-C(112)-C(172)-C(182) | 79.7(6)     |
| C(102)-C(112)-C(172)-C(192) | 134.1(5)    |
| C(122)-C(112)-C(172)-C(192) | -46.6(6)    |
| C(82)-C(132)-C(20C)-C(222)  | 132.8(8)    |
| C(122)-C(132)-C(20C)-C(222) | -37.8(13)   |
| C(82)-C(132)-C(20C)-C(21C)  | -103.0(10)  |
| C(122)-C(132)-C(20C)-C(21C) | 86.5(11)    |
| C(82)-C(132)-C(20D)-C(21D)  | -128.4(7)   |
| C(122)-C(132)-C(20D)-C(21D) | 44.4(8)     |
| C(82)-C(132)-C(20D)-C(222)  | 110.2(7)    |
| C(122)-C(132)-C(20D)-C(222) | -77.0(8)    |
| C(63)-C(13)-C(23)-C(33)     | 5.3(4)      |
| Fe(1)-C(13)-C(23)-C(33)     | 54.0(2)     |
| K(1)-C(13)-C(23)-C(33)      | -113.1(3)   |
| C(63)-C(13)-C(23)-C(21)     | -157.0(3)   |
| Fe(1)-C(13)-C(23)-C(21)     | -108.3(3)   |
| K(1)-C(13)-C(23)-C(21)      | 84.6(3)     |
| C(63)-C(13)-C(23)-Fe(1)     | -48.7(2)    |
| K(1)-C(13)-C(23)-Fe(1)      | -167.07(17) |
| C(31)-C(21)-C(23)-C(33)     | 117.1(3)    |
| C(11)-C(21)-C(23)-C(33)     | -68.5(4)    |
| C(31)-C(21)-C(23)-C(13)     | -80.4(4)    |
| C(11)-C(21)-C(23)-C(13)     | 94.0(4)     |
| C(31)-C(21)-C(23)-Fe(1)     | -160.7(3)   |
| C(11)-C(21)-C(23)-Fe(1)     | 13.7(4)     |
| C(13)-C(23)-C(33)-C(43)     | -1.8(4)     |
| C(21)-C(23)-C(33)-C(43)     | 160.3(3)    |
| Fe(1)-C(23)-C(33)-C(43)     | 51.7(3)     |
| C(13)-C(23)-C(33)-Fe(1)     | -53.5(2)    |
| C(21)-C(23)-C(33)-Fe(1)     | 108.7(3)    |
| C(23)-C(33)-C(43)-C(53)     | -2.0(5)     |
| Fe(1)-C(33)-C(43)-C(53)     | 47.8(3)     |
| C(23)-C(33)-C(43)-Fe(1)     | -49.8(3)    |
| C(33)-C(43)-C(53)-C(63)     | 2.3(5)      |
| Fe(1)-C(43)-C(53)-C(63)     | 50.4(3)     |
| C(33)-C(43)-C(53)-Fe(1)     | -48.1(3)    |
| C(23)-C(13)-C(63)-C(53)     | -5.0(4)     |
| Fe(1)-C(13)-C(63)-C(53)     | -54.0(3)    |
| K(1)-C(13)-C(63)-C(53)      | 112.4(3)    |
| C(23)-C(13)-C(63)-C(22)     | 159.3(3)    |
| Fe(1)-C(13)-C(63)-C(22)     | 110.4(3)    |
| K(1)-C(13)-C(63)-C(22)      | -83.3(3)    |
| C(23)-C(13)-C(63)-Fe(1)     | 48.9(2)     |
| K(1)-C(13)-C(63)-Fe(1)      | 166.33(14)  |
| C(43)-C(53)-C(63)-C(13)     | 1.3(5)      |
| Fe(1)-C(53)-C(63)-C(13)     | 54.1(3)     |
| C(43)-C(53)-C(63)-C(22)     | -163.2(3)   |
| Fe(1)-C(53)-C(63)-C(22)     | -110.4(3)   |
| C(43)-C(53)-C(63)-Fe(1)     | -52.8(3)    |
| C(32)-C(22)-C(63)-C(13)     | 83.7(5)     |
| C(12)-C(22)-C(63)-C(13)     | -94.1(4)    |
| C(32)-C(22)-C(63)-C(53)     | -111.7(4)   |
| C(12)-C(22)-C(63)-C(53)     | 70.5(5)     |
| C(32)-C(22)-C(63)-Fe(1)     | 166.2(3)    |
| C(12)-C(22)-C(63)-Fe(1)     | -11.6(5)    |
| C(50)-O(10)-C(20)-C(30)     | 10.6(4)     |



|                          |            |
|--------------------------|------------|
| K(1)-O(10)-C(20)-C(30)   | -143.3(3)  |
| O(10)-C(20)-C(30)-C(40)  | 13.9(5)    |
| C(20)-C(30)-C(40)-C(50)  | -31.6(5)   |
| C(20)-O(10)-C(50)-C(40)  | -30.9(4)   |
| K(1)-O(10)-C(50)-C(40)   | 129.0(3)   |
| C(20)-O(10)-C(50)-K(1)   | -159.9(3)  |
| C(30)-C(40)-C(50)-O(10)  | 39.1(5)    |
| C(30)-C(40)-C(50)-K(1)   | 82.1(4)    |
| C(10E)-O(60)-C(7E)-C(8E) | 12(5)      |
| K(1)-O(60)-C(7E)-C(8E)   | 168(2)     |
| O(60)-C(7E)-C(8E)-C(9E)  | 10(4)      |
| C(7E)-C(8E)-C(9E)-C(10E) | -30(5)     |
| C(7E)-O(60)-C(10E)-C(9E) | -28(4)     |
| K(1)-O(60)-C(10E)-C(9E)  | 174(2)     |
| C(7E)-O(60)-C(10E)-K(1)  | 158(3)     |
| C(8E)-C(9E)-C(10E)-O(60) | 34(5)      |
| C(8E)-C(9E)-C(10E)-K(1)  | 40(7)      |
| C(10F)-O(60)-C(7F)-C(8F) | 3(2)       |
| K(1)-O(60)-C(7F)-C(8F)   | 177.8(18)  |
| O(60)-C(7F)-C(8F)-C(9F)  | -21(3)     |
| C(7F)-C(8F)-C(9F)-C(10F) | 29(4)      |
| C(7F)-O(60)-C(10F)-C(9F) | 17(3)      |
| K(1)-O(60)-C(10F)-C(9F)  | -158.3(19) |
| C(8F)-C(9F)-C(10F)-O(60) | -29(4)     |

---

Symmetry transformations used to generate equivalent atoms:

#1  $x+1, y, z$  #2  $x-1, y, z$

### ***Experimental and Refinement Details for [LFeN<sub>2</sub>][K(18-crown-6)(THF)<sub>2</sub>]<sub>2</sub> (3)***

Single crystals for X-ray analysis were obtained from the reaction mixture in THF at -38 °C. Crystals were taken into cold Fomblin Y oil in the cold well (-70 °C) and transported cold (-78 °C) in a closed jar. Suitable crystal was selected under microscope while keeping the sample under cold nitrogen stream (< -80 °C). The pin with the crystal was immediately placed in the cold (liquid N<sub>2</sub>) cryo-tongs, transported on dry ice, and the crystal was placed on the goniometer under cold nitrogen stream. Low-temperature diffraction data ( $\omega$ -scans) were collected on a Rigaku R-AXIS RAPID diffractometer coupled to an R-AXIS RAPID imaging plate detector with Mo K $\alpha$  radiation ( $\lambda = 0.71073 \text{ \AA}$ ). All structures were solved by direct methods using SHELXS and were refined against  $F^2$  on all data by full-matrix least squares with SHELXL<sup>50</sup>. All non-hydrogen atoms were refined anisotropically. Hydrogen atoms were included in the model at geometrically calculated positions and refined using a riding model. The isotropic displacement parameters of all hydrogen atoms were fixed to 1.2 times the U value of the atoms to which they are linked (1.5 times for methyl groups).

The THF molecules that were modeled and included in this report are likely disordered. Rigid bond restraints were used to aid their refinement. Without these restraints, the models became unstable. A more traditional approach was tried, using multiple orientations of the solvents did not produce a stable refinement, which is likely related to the inherently weak data.

The program SQUEEZE was used to compensate for the contribution of disordered solvents contained in voids within the crystal lattice from the diffraction intensities<sup>51</sup>. This procedure was applied to the data file and the submitted model is based on the solvent removed data. Based on the total electron density found in the voids (375.8 e/ $\text{\AA}^3$ ), it is likely that ~9 THF molecules are present in the unit cell.

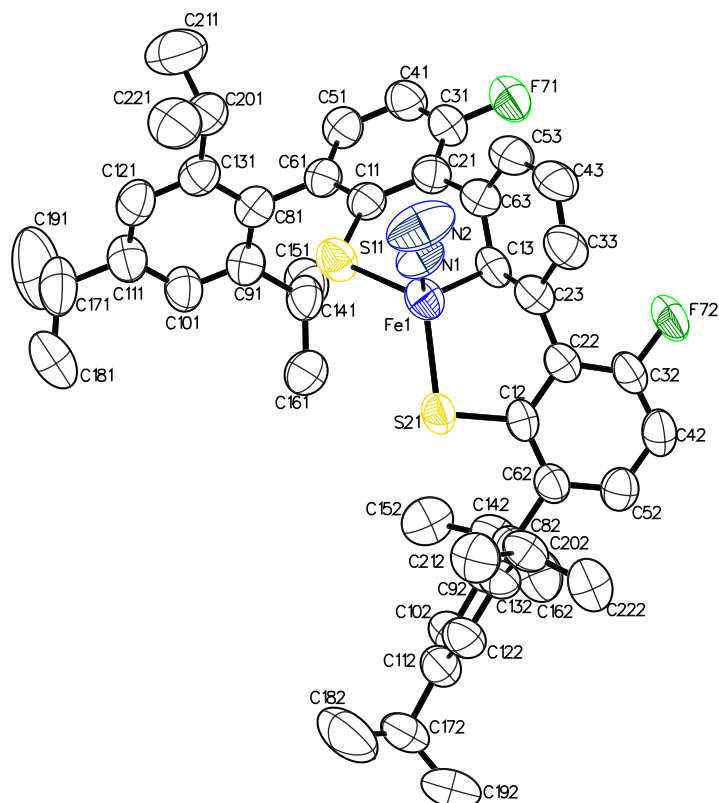

The full numbering scheme of the anionic portion of  $[\text{LFeN}_2][\text{K}(18\text{-crown-6})(\text{THF})_2]_2$  (**3**). All atoms shown are depicted with 50% thermal contours. The hydrogen atoms have been removed for clarity.

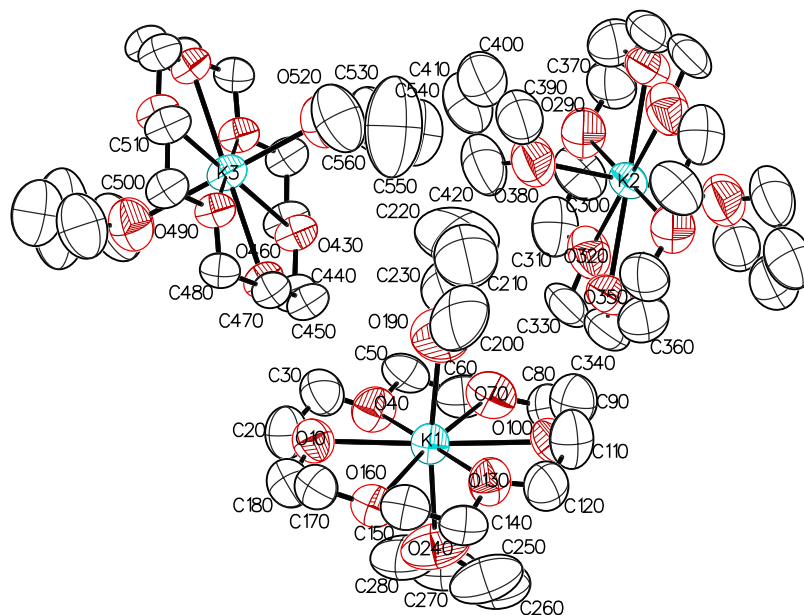

The full numbering scheme of the cationic portion of  $[\text{LFeN}_2][\text{K}(18\text{-crown-6})(\text{THF})_2]_2$  (**3**). All atoms shown are depicted with 50% thermal contours. The hydrogen atoms have been removed for clarity. K2 resides on an inversion center, and the symmetry equivalents of the numbered atoms are generated by the operation  $2-x, 1-y, 1-z$ . K3 resides on an inversion center, and the symmetry equivalents of the numbered atoms are generated by the operation  $1-x, 2-y, 1-z$ .

**Crystal data and structure refinement for [LFeN<sub>2</sub>][K(18-crown-6)(THF)<sub>2</sub>]<sub>2</sub> (3).**

|                                           |                                                                                                                |                              |
|-------------------------------------------|----------------------------------------------------------------------------------------------------------------|------------------------------|
| Identification code                       | spider-14110                                                                                                   |                              |
| Empirical formula                         | C <sub>88</sub> H <sub>134</sub> F <sub>2</sub> FeK <sub>2</sub> N <sub>2</sub> O <sub>16</sub> S <sub>2</sub> |                              |
| Formula weight                            | 1712.13                                                                                                        |                              |
| Temperature                               | 173(2) K                                                                                                       |                              |
| Wavelength                                | 0.71075 Å                                                                                                      |                              |
| Crystal system                            | Triclinic                                                                                                      |                              |
| Space group                               | <i>P</i> $\bar{1}$                                                                                             |                              |
| Unit cell dimensions                      | a = 13.6187(13) Å                                                                                              | $\alpha = 76.340(5)^\circ$ . |
|                                           | b = 21.0216(19) Å                                                                                              | $\beta = 85.562(6)^\circ$ .  |
|                                           | c = 24.295(2) Å                                                                                                | $\gamma = 71.430(5)^\circ$ . |
| Volume                                    | 6406.6(11) Å <sup>3</sup>                                                                                      |                              |
| Z                                         | 2                                                                                                              |                              |
| Density (calculated)                      | 0.888 g/cm <sup>3</sup>                                                                                        |                              |
| Absorption coefficient                    | 0.263 mm <sup>-1</sup>                                                                                         |                              |
| F(000)                                    | 1836                                                                                                           |                              |
| Crystal size                              | 0.220 x 0.180 x 0.090 mm <sup>3</sup>                                                                          |                              |
| Crystal color and habit                   | Red block                                                                                                      |                              |
| Diffractometer                            | Rigaku R-Axis RAPID imaging plate                                                                              |                              |
| $\Theta$ range for data collection        | 2.980 to 25.351°.                                                                                              |                              |
| Index ranges                              | -16 $\leq h \leq$ 16, -25 $\leq k \leq$ 25, -29 $\leq l \leq$ 29                                               |                              |
| Reflections collected                     | 184743                                                                                                         |                              |
| Independent reflections                   | 23441 [R(int) = 0.1374]                                                                                        |                              |
| Observed reflections (I > 2 $\sigma$ (I)) | 11283                                                                                                          |                              |
| Completeness to $\theta = 25.242^\circ$   | 99.8 %                                                                                                         |                              |
| Absorption correction                     | Semi-empirical from equivalents                                                                                |                              |
| Max. and min. transmission                | 1.000 and 0.475                                                                                                |                              |
| Solution method                           | SHELXT-2014/5 (Sheldrick, 2014)                                                                                |                              |
| Refinement method                         | SHELXL-2014/7 (Sheldrick, 2014)                                                                                |                              |
| Data / restraints / parameters            | 23441 / 120 / 1033                                                                                             |                              |
| Goodness-of-fit on F <sup>2</sup>         | 0.976                                                                                                          |                              |
| Final R indices [I > 2 $\sigma$ (I)]      | R1 = 0.0973, wR2 = 0.2661                                                                                      |                              |
| R indices (all data)                      | R1 = 0.1684, wR2 = 0.3192                                                                                      |                              |
| Largest diff. peak and hole               | 0.549 and -0.503 e.Å <sup>-3</sup>                                                                             |                              |

**Atomic coordinates (  $\times 10^4$ ) and equivalent isotropic displacement parameters ( $\text{\AA}^2 \times 10^3$ ) for  $[\text{LFeN}_2][\text{K}(\text{18-crown-6})(\text{THF})_2]_2$  (3).  $U(\text{eq})$  is defined as one third of the trace of the orthogonalized  $U^{ij}$  tensor.**

|        | x        | y       | z        | U(eq)  |
|--------|----------|---------|----------|--------|
| Fe(1)  | 6218(1)  | 6427(1) | 7067(1)  | 67(1)  |
| N(1)   | 6830(4)  | 6778(2) | 6443(2)  | 78(1)  |
| N(2)   | 7121(6)  | 7039(3) | 6030(3)  | 131(3) |
| S(11)  | 5923(1)  | 7174(1) | 7691(1)  | 76(1)  |
| S(21)  | 6904(1)  | 5270(1) | 7494(1)  | 66(1)  |
| C(11)  | 4621(4)  | 7688(2) | 7657(2)  | 62(1)  |
| C(21)  | 3939(4)  | 7715(3) | 7233(2)  | 64(1)  |
| C(31)  | 2966(4)  | 8171(3) | 7223(2)  | 74(1)  |
| C(41)  | 2607(4)  | 8598(3) | 7589(2)  | 75(1)  |
| C(51)  | 3275(4)  | 8564(3) | 8005(2)  | 68(1)  |
| C(61)  | 4269(4)  | 8109(2) | 8048(2)  | 59(1)  |
| F(71)  | 2274(3)  | 8207(2) | 6830(2)  | 94(1)  |
| C(81)  | 4947(4)  | 8078(3) | 8522(2)  | 62(1)  |
| C(91)  | 5006(4)  | 7587(3) | 9029(2)  | 67(1)  |
| C(101) | 5589(4)  | 7572(3) | 9466(2)  | 76(2)  |
| C(111) | 6112(5)  | 8044(3) | 9440(2)  | 79(2)  |
| C(121) | 6064(4)  | 8524(3) | 8940(3)  | 79(2)  |
| C(131) | 5472(4)  | 8554(3) | 8475(2)  | 70(1)  |
| C(141) | 4394(4)  | 7078(3) | 9107(2)  | 75(2)  |
| C(151) | 3446(5)  | 7286(3) | 9478(3)  | 91(2)  |
| C(161) | 5056(5)  | 6338(3) | 9336(3)  | 90(2)  |
| C(171) | 6742(6)  | 8026(4) | 9937(3)  | 110(2) |
| C(181) | 7413(8)  | 7324(5) | 10206(4) | 152(4) |
| C(191) | 6003(9)  | 8344(7) | 10380(5) | 196(5) |
| C(201) | 5454(5)  | 9088(3) | 7930(3)  | 84(2)  |
| C(211) | 4877(7)  | 9826(4) | 8013(4)  | 137(3) |
| C(221) | 6540(6)  | 9050(4) | 7697(3)  | 113(2) |
| C(12)  | 6074(3)  | 4921(3) | 7251(2)  | 56(1)  |
| C(22)  | 5283(3)  | 5344(3) | 6859(2)  | 60(1)  |
| C(32)  | 4686(4)  | 5017(3) | 6667(2)  | 68(1)  |
| C(42)  | 4777(4)  | 4337(3) | 6837(2)  | 75(2)  |
| C(52)  | 5549(4)  | 3926(3) | 7226(2)  | 68(1)  |
| C(62)  | 6187(4)  | 4213(3) | 7436(2)  | 61(1)  |
| F(72)  | 3895(2)  | 5410(2) | 6296(1)  | 89(1)  |
| C(82)  | 6997(4)  | 3753(3) | 7866(2)  | 64(1)  |
| C(92)  | 6745(4)  | 3638(3) | 8440(2)  | 73(1)  |
| C(102) | 7470(5)  | 3179(3) | 8836(2)  | 78(2)  |
| C(112) | 8432(5)  | 2830(3) | 8677(3)  | 80(2)  |
| C(122) | 8689(4)  | 2970(3) | 8104(3)  | 79(2)  |
| C(132) | 7989(4)  | 3413(3) | 7696(2)  | 69(1)  |
| C(142) | 5676(4)  | 4004(3) | 8646(2)  | 80(2)  |
| C(152) | 5756(5)  | 4421(3) | 9076(3)  | 97(2)  |
| C(162) | 5072(5)  | 3515(4) | 8884(3)  | 98(2)  |
| C(172) | 9217(5)  | 2310(3) | 9105(3)  | 97(2)  |
| C(182) | 10136(8) | 2458(6) | 9137(5)  | 204(6) |
| C(192) | 9357(9)  | 1598(4) | 9069(5)  | 183(5) |
| C(202) | 8298(4)  | 3537(3) | 7074(2)  | 77(2)  |
| C(212) | 9385(5)  | 3603(4) | 6986(3)  | 96(2)  |

|        |           |          |          |         |
|--------|-----------|----------|----------|---------|
| C(222) | 8215(5)   | 2966(4)  | 6818(3)  | 97(2)   |
| C(13)  | 4677(4)   | 6552(3)  | 7033(2)  | 62(1)   |
| C(23)  | 5100(4)   | 6094(3)  | 6661(2)  | 66(1)   |
| C(33)  | 4989(5)   | 6406(3)  | 6062(2)  | 81(2)   |
| C(43)  | 4544(5)   | 7089(3)  | 5865(2)  | 88(2)   |
| C(53)  | 4171(5)   | 7538(3)  | 6248(3)  | 88(2)   |
| C(63)  | 4251(4)   | 7272(3)  | 6819(2)  | 69(1)   |
| K(1)   | 10591(1)  | 5904(1)  | 8302(1)  | 79(1)   |
| O(10)  | 11050(4)  | 4596(2)  | 8118(2)  | 106(1)  |
| C(20)  | 12097(6)  | 4188(4)  | 8165(4)  | 124(3)  |
| C(30)  | 12731(7)  | 4655(4)  | 7937(4)  | 127(3)  |
| O(40)  | 12680(4)  | 5142(3)  | 8207(2)  | 110(1)  |
| C(50)  | 13321(5)  | 5552(4)  | 8009(3)  | 100(2)  |
| C(60)  | 13108(6)  | 6096(5)  | 8327(4)  | 122(3)  |
| O(70)  | 12117(4)  | 6547(3)  | 8193(2)  | 120(2)  |
| C(80)  | 11869(7)  | 7146(5)  | 8392(4)  | 120(3)  |
| C(90)  | 10845(8)  | 7595(5)  | 8188(5)  | 139(3)  |
| O(100) | 10098(5)  | 7305(3)  | 8439(2)  | 118(2)  |
| C(110) | 9091(7)   | 7662(5)  | 8272(5)  | 140(3)  |
| C(120) | 8404(7)   | 7284(5)  | 8583(4)  | 138(3)  |
| O(130) | 8618(4)   | 6668(3)  | 8462(2)  | 116(2)  |
| C(140) | 7960(5)   | 6291(4)  | 8741(3)  | 100(2)  |
| C(150) | 8090(5)   | 5726(4)  | 8464(3)  | 107(2)  |
| O(160) | 9083(3)   | 5245(2)  | 8560(2)  | 99(1)   |
| C(170) | 9255(6)   | 4686(4)  | 8280(3)  | 102(2)  |
| C(180) | 10341(7)  | 4255(4)  | 8378(4)  | 117(2)  |
| O(190) | 10459(10) | 6510(5)  | 7181(4)  | 211(4)  |
| C(200) | 9487(15)  | 6933(9)  | 6871(7)  | 248(6)  |
| C(210) | 9828(18)  | 7219(10) | 6310(8)  | 263(7)  |
| C(220) | 10905(19) | 7056(12) | 6272(7)  | 317(11) |
| C(230) | 11299(14) | 6663(7)  | 6839(5)  | 206(5)  |
| O(240) | 10974(6)  | 5460(5)  | 9432(3)  | 182(3)  |
| C(250) | 10644(10) | 5906(8)  | 9817(5)  | 201(5)  |
| C(260) | 11661(10) | 5848(8)  | 10076(5) | 186(4)  |
| C(270) | 12442(10) | 5234(7)  | 9949(4)  | 175(4)  |
| C(280) | 11902(11) | 4929(7)  | 9652(5)  | 189(4)  |
| K(2)   | 5000      | 10000    | 5000     | 81(1)   |
| O(290) | 7145(4)   | 9415(3)  | 4800(3)  | 128(2)  |
| C(300) | 7727(8)   | 9117(5)  | 5309(5)  | 143(3)  |
| C(310) | 7203(8)   | 8693(5)  | 5718(5)  | 146(4)  |
| O(320) | 6260(6)   | 9082(3)  | 5883(3)  | 134(2)  |
| C(330) | 5746(9)   | 8686(4)  | 6290(4)  | 135(3)  |
| C(340) | 4701(10)  | 9166(5)  | 6439(4)  | 137(3)  |
| O(350) | 4116(6)   | 9421(3)  | 5978(2)  | 133(2)  |
| C(360) | 3105(8)   | 9837(6)  | 6114(5)  | 150(4)  |
| C(370) | 7520(9)   | 9876(6)  | 4424(6)  | 164(4)  |
| C(390) | 4018(10)  | 9258(5)  | 3954(5)  | 160(3)  |
| C(400) | 4738(12)  | 8918(6)  | 3615(6)  | 190(5)  |
| C(410) | 5545(11)  | 8541(6)  | 3974(7)  | 185(4)  |
| C(420) | 5168(11)  | 8497(5)  | 4577(5)  | 187(4)  |
| O(380) | 4384(7)   | 9156(3)  | 4498(3)  | 168(3)  |
| K(3)   | 10000     | 5000     | 5000     | 73(1)   |
| O(430) | 10738(3)  | 5370(2)  | 5888(2)  | 76(1)   |
| C(440) | 10251(4)  | 5158(4)  | 6418(2)  | 85(2)   |
| C(450) | 9114(4)   | 5433(3)  | 6334(2)  | 78(2)   |
| C(470) | 7728(4)   | 5294(3)  | 5891(2)  | 74(1)   |

|        |          |          |          |         |
|--------|----------|----------|----------|---------|
| C(480) | 7511(4)  | 4861(3)  | 5550(2)  | 73(1)   |
| O(490) | 7924(3)  | 5011(2)  | 4996(2)  | 72(1)   |
| C(500) | 7725(4)  | 4622(4)  | 4639(3)  | 83(2)   |
| C(510) | 8162(4)  | 4842(4)  | 4064(3)  | 88(2)   |
| O(520) | 9327(5)  | 6356(3)  | 4542(3)  | 143(2)  |
| C(530) | 9703(10) | 6833(6)  | 4690(6)  | 182(4)  |
| C(540) | 8774(12) | 7389(7)  | 4749(7)  | 206(5)  |
| C(550) | 8004(14) | 7279(10) | 4509(11) | 317(13) |
| C(560) | 8366(11) | 6671(6)  | 4373(7)  | 194(5)  |
| O(460) | 8832(2)  | 5091(2)  | 5966(2)  | 71(1)   |

---

**Bond lengths [Å] and angles [°] for [LFeN<sub>2</sub>][K(18-crown-6)(THF)<sub>2</sub>]<sub>2</sub> (3).**

|               |            |
|---------------|------------|
| Fe(1)-N(1)    | 1.790(5)   |
| Fe(1)-C(13)   | 2.037(5)   |
| Fe(1)-C(23)   | 2.239(5)   |
| Fe(1)-S(21)   | 2.3201(16) |
| Fe(1)-S(11)   | 2.3549(16) |
| N(1)-N(2)     | 1.132(7)   |
| S(11)-C(11)   | 1.754(5)   |
| S(21)-C(12)   | 1.733(4)   |
| C(11)-C(61)   | 1.405(7)   |
| C(11)-C(21)   | 1.421(7)   |
| C(21)-C(31)   | 1.364(7)   |
| C(21)-C(63)   | 1.476(7)   |
| C(31)-F(71)   | 1.365(6)   |
| C(31)-C(41)   | 1.367(8)   |
| C(41)-C(51)   | 1.385(7)   |
| C(41)-H(41)   | 0.9500     |
| C(51)-C(61)   | 1.381(7)   |
| C(51)-H(51)   | 0.9500     |
| C(61)-C(81)   | 1.506(7)   |
| C(81)-C(131)  | 1.384(7)   |
| C(81)-C(91)   | 1.397(7)   |
| C(91)-C(101)  | 1.363(7)   |
| C(91)-C(141)  | 1.524(7)   |
| C(101)-C(111) | 1.382(8)   |
| C(101)-H(101) | 0.9500     |
| C(111)-C(121) | 1.374(8)   |
| C(111)-C(171) | 1.522(9)   |
| C(121)-C(131) | 1.417(8)   |
| C(121)-H(121) | 0.9500     |
| C(131)-C(201) | 1.516(8)   |
| C(141)-C(161) | 1.522(8)   |
| C(141)-C(151) | 1.523(8)   |
| C(141)-H(141) | 1.0000     |
| C(151)-H(15A) | 0.9800     |
| C(151)-H(15B) | 0.9800     |
| C(151)-H(15C) | 0.9800     |
| C(161)-H(16A) | 0.9800     |

|               |           |
|---------------|-----------|
| C(161)-H(16B) | 0.9800    |
| C(161)-H(16C) | 0.9800    |
| C(171)-C(181) | 1.489(11) |
| C(171)-C(191) | 1.536(13) |
| C(171)-H(171) | 1.0000    |
| C(181)-H(18A) | 0.9800    |
| C(181)-H(18B) | 0.9800    |
| C(181)-H(18C) | 0.9800    |
| C(191)-H(19A) | 0.9800    |
| C(191)-H(19B) | 0.9800    |
| C(191)-H(19C) | 0.9800    |
| C(201)-C(221) | 1.527(9)  |
| C(201)-C(211) | 1.552(10) |
| C(201)-H(201) | 1.0000    |
| C(211)-H(21A) | 0.9800    |
| C(211)-H(21B) | 0.9800    |
| C(211)-H(21C) | 0.9800    |
| C(221)-H(22A) | 0.9800    |
| C(221)-H(22B) | 0.9800    |
| C(221)-H(22C) | 0.9800    |
| C(12)-C(62)   | 1.411(7)  |
| C(12)-C(22)   | 1.416(6)  |
| C(22)-C(32)   | 1.385(7)  |
| C(22)-C(23)   | 1.480(7)  |
| C(32)-C(42)   | 1.360(8)  |
| C(32)-F(72)   | 1.373(6)  |
| C(42)-C(52)   | 1.390(7)  |
| C(42)-H(42)   | 0.9500    |
| C(52)-C(62)   | 1.388(7)  |
| C(52)-H(52)   | 0.9500    |
| C(62)-C(82)   | 1.505(7)  |
| C(82)-C(92)   | 1.393(7)  |
| C(82)-C(132)  | 1.394(7)  |
| C(92)-C(102)  | 1.389(8)  |
| C(92)-C(142)  | 1.522(8)  |
| C(102)-C(112) | 1.360(8)  |
| C(102)-H(102) | 0.9500    |
| C(112)-C(122) | 1.393(8)  |
| C(112)-C(172) | 1.519(8)  |
| C(122)-C(132) | 1.380(7)  |
| C(122)-H(122) | 0.9500    |
| C(132)-C(202) | 1.520(8)  |
| C(142)-C(162) | 1.502(9)  |
| C(142)-C(152) | 1.543(9)  |
| C(142)-H(142) | 1.0000    |
| C(152)-H(15D) | 0.9800    |
| C(152)-H(15E) | 0.9800    |
| C(152)-H(15F) | 0.9800    |
| C(162)-H(16D) | 0.9800    |
| C(162)-H(16E) | 0.9800    |
| C(162)-H(16F) | 0.9800    |
| C(172)-C(182) | 1.393(11) |
| C(172)-C(192) | 1.472(11) |
| C(172)-H(172) | 1.0000    |
| C(182)-H(18D) | 0.9800    |
| C(182)-H(18E) | 0.9800    |



|               |           |
|---------------|-----------|
| C(182)-H(18F) | 0.9800    |
| C(192)-H(19D) | 0.9800    |
| C(192)-H(19E) | 0.9800    |
| C(192)-H(19F) | 0.9800    |
| C(202)-C(222) | 1.513(8)  |
| C(202)-C(212) | 1.523(8)  |
| C(202)-H(202) | 1.0000    |
| C(212)-H(21D) | 0.9800    |
| C(212)-H(21E) | 0.9800    |
| C(212)-H(21F) | 0.9800    |
| C(222)-H(22D) | 0.9800    |
| C(222)-H(22E) | 0.9800    |
| C(222)-H(22F) | 0.9800    |
| C(13)-C(63)   | 1.420(7)  |
| C(13)-C(23)   | 1.432(7)  |
| C(13)-H(13)   | 0.9500    |
| C(23)-C(33)   | 1.446(7)  |
| C(33)-C(43)   | 1.351(8)  |
| C(33)-H(33)   | 0.9500    |
| C(43)-C(53)   | 1.431(9)  |
| C(43)-H(43)   | 0.9500    |
| C(53)-C(63)   | 1.366(8)  |
| C(53)-H(53)   | 0.9500    |
| K(1)-O(130)   | 2.708(5)  |
| K(1)-O(190)   | 2.715(9)  |
| K(1)-O(240)   | 2.717(7)  |
| K(1)-O(10)    | 2.756(5)  |
| K(1)-O(160)   | 2.780(4)  |
| K(1)-O(70)    | 2.784(5)  |
| K(1)-O(40)    | 2.808(5)  |
| K(1)-O(100)   | 2.899(5)  |
| O(10)-C(180)  | 1.406(9)  |
| O(10)-C(20)   | 1.407(8)  |
| C(20)-C(30)   | 1.492(11) |
| C(20)-H(20A)  | 0.9900    |
| C(20)-H(20B)  | 0.9900    |
| C(30)-O(40)   | 1.321(9)  |
| C(30)-H(30A)  | 0.9900    |
| C(30)-H(30B)  | 0.9900    |
| O(40)-C(50)   | 1.399(8)  |
| C(50)-C(60)   | 1.468(10) |
| C(50)-H(50A)  | 0.9900    |
| C(50)-H(50B)  | 0.9900    |
| C(60)-O(70)   | 1.391(9)  |
| C(60)-H(60A)  | 0.9900    |
| C(60)-H(60B)  | 0.9900    |
| O(70)-C(80)   | 1.388(9)  |
| C(80)-C(90)   | 1.459(12) |
| C(80)-H(80A)  | 0.9900    |
| C(80)-H(80B)  | 0.9900    |
| C(90)-O(100)  | 1.380(10) |
| C(90)-H(90A)  | 0.9900    |
| C(90)-H(90B)  | 0.9900    |
| O(100)-C(110) | 1.377(9)  |
| C(110)-C(120) | 1.468(11) |
| C(110)-H(11A) | 0.9900    |

|               |           |
|---------------|-----------|
| C(110)-H(11B) | 0.9900    |
| C(120)-O(130) | 1.333(9)  |
| C(120)-H(12A) | 0.9900    |
| C(120)-H(12B) | 0.9900    |
| O(130)-C(140) | 1.413(8)  |
| C(140)-C(150) | 1.456(10) |
| C(140)-H(14A) | 0.9900    |
| C(140)-H(14B) | 0.9900    |
| C(150)-O(160) | 1.403(8)  |
| C(150)-H(15G) | 0.9900    |
| C(150)-H(15H) | 0.9900    |
| O(160)-C(170) | 1.440(8)  |
| C(170)-C(180) | 1.472(10) |
| C(170)-H(17A) | 0.9900    |
| C(170)-H(17B) | 0.9900    |
| C(180)-H(18G) | 0.9900    |
| C(180)-H(18H) | 0.9900    |
| O(190)-C(230) | 1.436(16) |
| O(190)-C(200) | 1.482(17) |
| C(200)-C(210) | 1.46(2)   |
| C(200)-H(20C) | 0.9900    |
| C(200)-H(20D) | 0.9900    |
| C(210)-C(220) | 1.40(3)   |
| C(210)-H(21G) | 0.9900    |
| C(210)-H(21H) | 0.9900    |
| C(220)-C(230) | 1.471(18) |
| C(220)-H(22G) | 0.9900    |
| C(220)-H(22H) | 0.9900    |
| C(230)-H(23A) | 0.9900    |
| C(230)-H(23B) | 0.9900    |
| O(240)-C(250) | 1.427(14) |
| O(240)-C(280) | 1.433(14) |
| C(250)-C(260) | 1.523(15) |
| C(250)-H(25A) | 0.9900    |
| C(250)-H(25B) | 0.9900    |
| C(260)-C(270) | 1.467(16) |
| C(260)-H(26A) | 0.9900    |
| C(260)-H(26B) | 0.9900    |
| C(270)-C(280) | 1.441(15) |
| C(270)-H(27A) | 0.9900    |
| C(270)-H(27B) | 0.9900    |
| C(280)-H(28A) | 0.9900    |
| C(280)-H(28B) | 0.9900    |
| K(2)-O(380)#1 | 2.732(7)  |
| K(2)-O(380)   | 2.732(7)  |
| K(2)-O(350)   | 2.774(5)  |
| K(2)-O(350)#1 | 2.774(6)  |
| K(2)-O(320)   | 2.788(6)  |
| K(2)-O(320)#1 | 2.788(6)  |
| K(2)-O(290)#1 | 2.839(5)  |
| K(2)-O(290)   | 2.839(5)  |
| O(290)-C(370) | 1.364(10) |
| O(290)-C(300) | 1.420(10) |
| C(300)-C(310) | 1.473(13) |
| C(300)-H(30C) | 0.9900    |
| C(300)-H(30D) | 0.9900    |

|                 |           |
|-----------------|-----------|
| C(310)-O(320)   | 1.372(11) |
| C(310)-H(31A)   | 0.9900    |
| C(310)-H(31B)   | 0.9900    |
| O(320)-C(330)   | 1.428(10) |
| C(330)-C(340)   | 1.533(13) |
| C(330)-H(33A)   | 0.9900    |
| C(330)-H(33B)   | 0.9900    |
| C(340)-O(350)   | 1.327(10) |
| C(340)-H(34A)   | 0.9900    |
| C(340)-H(34B)   | 0.9900    |
| O(350)-C(360)   | 1.439(11) |
| C(360)-C(370)#1 | 1.506(15) |
| C(360)-H(36A)   | 0.9900    |
| C(360)-H(36B)   | 0.9900    |
| C(370)-C(360)#1 | 1.506(15) |
| C(370)-H(37A)   | 0.9900    |
| C(370)-H(37B)   | 0.9900    |
| C(390)-C(400)   | 1.362(15) |
| C(390)-O(380)   | 1.394(11) |
| C(390)-H(39A)   | 0.9900    |
| C(390)-H(39B)   | 0.9900    |
| C(400)-C(410)   | 1.365(16) |
| C(400)-H(40A)   | 0.9900    |
| C(400)-H(40B)   | 0.9900    |
| C(410)-C(420)   | 1.505(17) |
| C(410)-H(41A)   | 0.9900    |
| C(410)-H(41B)   | 0.9900    |
| C(420)-O(380)   | 1.435(13) |
| C(420)-H(42A)   | 0.9900    |
| C(420)-H(42B)   | 0.9900    |
| K(3)-O(520)#2   | 2.684(6)  |
| K(3)-O(520)     | 2.684(6)  |
| K(3)-O(460)     | 2.741(3)  |
| K(3)-O(460)#2   | 2.741(3)  |
| K(3)-O(430)#2   | 2.811(3)  |
| K(3)-O(430)     | 2.811(3)  |
| K(3)-O(490)#2   | 2.822(3)  |
| K(3)-O(490)     | 2.822(3)  |
| O(430)-C(510)#2 | 1.426(6)  |
| O(430)-C(440)   | 1.443(7)  |
| C(440)-C(450)   | 1.482(7)  |
| C(440)-H(44A)   | 0.9900    |
| C(440)-H(44B)   | 0.9900    |
| C(450)-O(460)   | 1.413(6)  |
| C(450)-H(45A)   | 0.9900    |
| C(450)-H(45B)   | 0.9900    |
| C(470)-O(460)   | 1.440(6)  |
| C(470)-C(480)   | 1.473(7)  |
| C(470)-H(47A)   | 0.9900    |
| C(470)-H(47B)   | 0.9900    |
| C(480)-O(490)   | 1.423(6)  |
| C(480)-H(48A)   | 0.9900    |
| C(480)-H(48B)   | 0.9900    |
| O(490)-C(500)   | 1.415(6)  |
| C(500)-C(510)   | 1.503(8)  |
| C(500)-H(50C)   | 0.9900    |

|                 |           |
|-----------------|-----------|
| C(500)-H(50D)   | 0.9900    |
| C(510)-O(430)#2 | 1.426(6)  |
| C(510)-H(51A)   | 0.9900    |
| C(510)-H(51B)   | 0.9900    |
| O(520)-C(560)   | 1.312(12) |
| O(520)-C(530)   | 1.386(12) |
| C(530)-C(540)   | 1.448(16) |
| C(530)-H(53A)   | 0.9900    |
| C(530)-H(53B)   | 0.9900    |
| C(540)-C(550)   | 1.345(18) |
| C(540)-H(54A)   | 0.9900    |
| C(540)-H(54B)   | 0.9900    |
| C(550)-C(560)   | 1.325(18) |
| C(550)-H(55A)   | 0.9900    |
| C(550)-H(55B)   | 0.9900    |
| C(560)-H(56A)   | 0.9900    |
| C(560)-H(56B)   | 0.9900    |

|                     |            |
|---------------------|------------|
| N(1)-Fe(1)-C(13)    | 118.3(2)   |
| N(1)-Fe(1)-C(23)    | 99.2(2)    |
| C(13)-Fe(1)-C(23)   | 38.77(19)  |
| N(1)-Fe(1)-S(21)    | 118.88(15) |
| C(13)-Fe(1)-S(21)   | 102.71(15) |
| C(23)-Fe(1)-S(21)   | 85.25(14)  |
| N(1)-Fe(1)-S(11)    | 108.09(15) |
| C(13)-Fe(1)-S(11)   | 91.57(14)  |
| C(23)-Fe(1)-S(11)   | 130.34(13) |
| S(21)-Fe(1)-S(11)   | 114.30(6)  |
| N(2)-N(1)-Fe(1)     | 173.1(6)   |
| C(11)-S(11)-Fe(1)   | 110.05(18) |
| C(12)-S(21)-Fe(1)   | 101.46(17) |
| C(61)-C(11)-C(21)   | 119.7(5)   |
| C(61)-C(11)-S(11)   | 118.3(4)   |
| C(21)-C(11)-S(11)   | 122.0(4)   |
| C(31)-C(21)-C(11)   | 116.9(5)   |
| C(31)-C(21)-C(63)   | 120.7(5)   |
| C(11)-C(21)-C(63)   | 122.4(5)   |
| C(21)-C(31)-F(71)   | 119.2(5)   |
| C(21)-C(31)-C(41)   | 124.8(5)   |
| F(71)-C(31)-C(41)   | 116.0(5)   |
| C(31)-C(41)-C(51)   | 117.9(5)   |
| C(31)-C(41)-H(41)   | 121.1      |
| C(51)-C(41)-H(41)   | 121.1      |
| C(61)-C(51)-C(41)   | 120.9(5)   |
| C(61)-C(51)-H(51)   | 119.5      |
| C(41)-C(51)-H(51)   | 119.5      |
| C(51)-C(61)-C(11)   | 119.8(5)   |
| C(51)-C(61)-C(81)   | 118.5(4)   |
| C(11)-C(61)-C(81)   | 121.7(4)   |
| C(131)-C(81)-C(91)  | 119.0(5)   |
| C(131)-C(81)-C(61)  | 120.9(5)   |
| C(91)-C(81)-C(61)   | 119.9(4)   |
| C(101)-C(91)-C(81)  | 120.2(5)   |
| C(101)-C(91)-C(141) | 119.3(5)   |
| C(81)-C(91)-C(141)  | 120.5(5)   |
| C(91)-C(101)-C(111) | 122.6(5)   |

|                      |          |
|----------------------|----------|
| C(91)-C(101)-H(101)  | 118.7    |
| C(111)-C(101)-H(101) | 118.7    |
| C(121)-C(111)-C(101) | 117.4(5) |
| C(121)-C(111)-C(171) | 120.9(6) |
| C(101)-C(111)-C(171) | 121.7(6) |
| C(111)-C(121)-C(131) | 121.6(5) |
| C(111)-C(121)-H(121) | 119.2    |
| C(131)-C(121)-H(121) | 119.2    |
| C(81)-C(131)-C(121)  | 119.1(5) |
| C(81)-C(131)-C(201)  | 121.3(5) |
| C(121)-C(131)-C(201) | 119.6(5) |
| C(161)-C(141)-C(151) | 111.4(5) |
| C(161)-C(141)-C(91)  | 112.6(5) |
| C(151)-C(141)-C(91)  | 110.7(5) |
| C(161)-C(141)-H(141) | 107.3    |
| C(151)-C(141)-H(141) | 107.3    |
| C(91)-C(141)-H(141)  | 107.3    |
| C(141)-C(151)-H(15A) | 109.5    |
| C(141)-C(151)-H(15B) | 109.5    |
| H(15A)-C(151)-H(15B) | 109.5    |
| C(141)-C(151)-H(15C) | 109.5    |
| H(15A)-C(151)-H(15C) | 109.5    |
| H(15B)-C(151)-H(15C) | 109.5    |
| C(141)-C(161)-H(16A) | 109.5    |
| C(141)-C(161)-H(16B) | 109.5    |
| H(16A)-C(161)-H(16B) | 109.5    |
| C(141)-C(161)-H(16C) | 109.5    |
| H(16A)-C(161)-H(16C) | 109.5    |
| H(16B)-C(161)-H(16C) | 109.5    |
| C(181)-C(171)-C(111) | 113.9(6) |
| C(181)-C(171)-C(191) | 110.0(8) |
| C(111)-C(171)-C(191) | 109.0(7) |
| C(181)-C(171)-H(171) | 107.9    |
| C(111)-C(171)-H(171) | 107.9    |
| C(191)-C(171)-H(171) | 107.9    |
| C(171)-C(181)-H(18A) | 109.5    |
| C(171)-C(181)-H(18B) | 109.5    |
| H(18A)-C(181)-H(18B) | 109.5    |
| C(171)-C(181)-H(18C) | 109.5    |
| H(18A)-C(181)-H(18C) | 109.5    |
| H(18B)-C(181)-H(18C) | 109.5    |
| C(171)-C(191)-H(19A) | 109.5    |
| C(171)-C(191)-H(19B) | 109.5    |
| H(19A)-C(191)-H(19B) | 109.5    |
| C(171)-C(191)-H(19C) | 109.5    |
| H(19A)-C(191)-H(19C) | 109.5    |
| H(19B)-C(191)-H(19C) | 109.5    |
| C(131)-C(201)-C(221) | 112.3(5) |
| C(131)-C(201)-C(211) | 111.2(6) |
| C(221)-C(201)-C(211) | 109.8(6) |
| C(131)-C(201)-H(201) | 107.8    |
| C(221)-C(201)-H(201) | 107.8    |
| C(211)-C(201)-H(201) | 107.8    |
| C(201)-C(211)-H(21A) | 109.5    |
| C(201)-C(211)-H(21B) | 109.5    |
| H(21A)-C(211)-H(21B) | 109.5    |

|                      |          |
|----------------------|----------|
| C(201)-C(211)-H(21C) | 109.5    |
| H(21A)-C(211)-H(21C) | 109.5    |
| H(21B)-C(211)-H(21C) | 109.5    |
| C(201)-C(221)-H(22A) | 109.5    |
| C(201)-C(221)-H(22B) | 109.5    |
| H(22A)-C(221)-H(22B) | 109.5    |
| C(201)-C(221)-H(22C) | 109.5    |
| H(22A)-C(221)-H(22C) | 109.5    |
| H(22B)-C(221)-H(22C) | 109.5    |
| C(62)-C(12)-C(22)    | 119.5(4) |
| C(62)-C(12)-S(21)    | 120.3(3) |
| C(22)-C(12)-S(21)    | 120.1(4) |
| C(32)-C(22)-C(12)    | 116.3(5) |
| C(32)-C(22)-C(23)    | 121.4(4) |
| C(12)-C(22)-C(23)    | 122.3(4) |
| C(42)-C(32)-F(72)    | 116.2(4) |
| C(42)-C(32)-C(22)    | 125.4(5) |
| F(72)-C(32)-C(22)    | 118.3(5) |
| C(32)-C(42)-C(52)    | 117.9(5) |
| C(32)-C(42)-H(42)    | 121.1    |
| C(52)-C(42)-H(42)    | 121.1    |
| C(62)-C(52)-C(42)    | 120.3(5) |
| C(62)-C(52)-H(52)    | 119.9    |
| C(42)-C(52)-H(52)    | 119.9    |
| C(52)-C(62)-C(12)    | 120.6(4) |
| C(52)-C(62)-C(82)    | 118.6(5) |
| C(12)-C(62)-C(82)    | 120.8(4) |
| C(92)-C(82)-C(132)   | 119.2(5) |
| C(92)-C(82)-C(62)    | 119.9(5) |
| C(132)-C(82)-C(62)   | 120.8(5) |
| C(102)-C(92)-C(82)   | 120.1(5) |
| C(102)-C(92)-C(142)  | 118.9(5) |
| C(82)-C(92)-C(142)   | 121.0(5) |
| C(112)-C(102)-C(92)  | 121.5(5) |
| C(112)-C(102)-H(102) | 119.2    |
| C(92)-C(102)-H(102)  | 119.2    |
| C(102)-C(112)-C(122) | 117.8(5) |
| C(102)-C(112)-C(172) | 121.8(6) |
| C(122)-C(112)-C(172) | 120.4(6) |
| C(132)-C(122)-C(112) | 122.7(5) |
| C(132)-C(122)-H(122) | 118.7    |
| C(112)-C(122)-H(122) | 118.7    |
| C(122)-C(132)-C(82)  | 118.6(5) |
| C(122)-C(132)-C(202) | 120.7(5) |
| C(82)-C(132)-C(202)  | 120.7(5) |
| C(162)-C(142)-C(92)  | 112.0(5) |
| C(162)-C(142)-C(152) | 111.4(5) |
| C(92)-C(142)-C(152)  | 110.9(5) |
| C(162)-C(142)-H(142) | 107.4    |
| C(92)-C(142)-H(142)  | 107.4    |
| C(152)-C(142)-H(142) | 107.4    |
| C(142)-C(152)-H(15D) | 109.5    |
| C(142)-C(152)-H(15E) | 109.5    |
| H(15D)-C(152)-H(15E) | 109.5    |
| C(142)-C(152)-H(15F) | 109.5    |
| H(15D)-C(152)-H(15F) | 109.5    |

|                      |          |
|----------------------|----------|
| H(15E)-C(152)-H(15F) | 109.5    |
| C(142)-C(162)-H(16D) | 109.5    |
| C(142)-C(162)-H(16E) | 109.5    |
| H(16D)-C(162)-H(16E) | 109.5    |
| C(142)-C(162)-H(16F) | 109.5    |
| H(16D)-C(162)-H(16F) | 109.5    |
| H(16E)-C(162)-H(16F) | 109.5    |
| C(182)-C(172)-C(192) | 114.6(9) |
| C(182)-C(172)-C(112) | 115.6(7) |
| C(192)-C(172)-C(112) | 111.9(6) |
| C(182)-C(172)-H(172) | 104.4    |
| C(192)-C(172)-H(172) | 104.4    |
| C(112)-C(172)-H(172) | 104.4    |
| C(172)-C(182)-H(18D) | 109.5    |
| C(172)-C(182)-H(18E) | 109.5    |
| H(18D)-C(182)-H(18E) | 109.5    |
| C(172)-C(182)-H(18F) | 109.5    |
| H(18D)-C(182)-H(18F) | 109.5    |
| H(18E)-C(182)-H(18F) | 109.5    |
| C(172)-C(192)-H(19D) | 109.5    |
| C(172)-C(192)-H(19E) | 109.5    |
| H(19D)-C(192)-H(19E) | 109.5    |
| C(172)-C(192)-H(19F) | 109.5    |
| H(19D)-C(192)-H(19F) | 109.5    |
| H(19E)-C(192)-H(19F) | 109.5    |
| C(222)-C(202)-C(132) | 110.2(5) |
| C(222)-C(202)-C(212) | 110.2(5) |
| C(132)-C(202)-C(212) | 112.4(5) |
| C(222)-C(202)-H(202) | 108.0    |
| C(132)-C(202)-H(202) | 108.0    |
| C(212)-C(202)-H(202) | 108.0    |
| C(202)-C(212)-H(21D) | 109.5    |
| C(202)-C(212)-H(21E) | 109.5    |
| H(21D)-C(212)-H(21E) | 109.5    |
| C(202)-C(212)-H(21F) | 109.5    |
| H(21D)-C(212)-H(21F) | 109.5    |
| H(21E)-C(212)-H(21F) | 109.5    |
| C(202)-C(222)-H(22D) | 109.5    |
| C(202)-C(222)-H(22E) | 109.5    |
| H(22D)-C(222)-H(22E) | 109.5    |
| C(202)-C(222)-H(22F) | 109.5    |
| H(22D)-C(222)-H(22F) | 109.5    |
| H(22E)-C(222)-H(22F) | 109.5    |
| C(63)-C(13)-C(23)    | 121.1(4) |
| C(63)-C(13)-Fe(1)    | 102.4(3) |
| C(23)-C(13)-Fe(1)    | 78.3(3)  |
| C(63)-C(13)-H(13)    | 119.4    |
| C(23)-C(13)-H(13)    | 119.4    |
| Fe(1)-C(13)-H(13)    | 89.3     |
| C(13)-C(23)-C(33)    | 115.8(5) |
| C(13)-C(23)-C(22)    | 121.0(4) |
| C(33)-C(23)-C(22)    | 119.6(5) |
| C(13)-C(23)-Fe(1)    | 63.0(3)  |
| C(33)-C(23)-Fe(1)    | 111.7(4) |
| C(22)-C(23)-Fe(1)    | 110.7(3) |
| C(43)-C(33)-C(23)    | 122.1(5) |

|                     |            |
|---------------------|------------|
| C(43)-C(33)-H(33)   | 119.0      |
| C(23)-C(33)-H(33)   | 119.0      |
| C(33)-C(43)-C(53)   | 120.7(5)   |
| C(33)-C(43)-H(43)   | 119.6      |
| C(53)-C(43)-H(43)   | 119.6      |
| C(63)-C(53)-C(43)   | 119.7(5)   |
| C(63)-C(53)-H(53)   | 120.1      |
| C(43)-C(53)-H(53)   | 120.1      |
| C(53)-C(63)-C(13)   | 120.3(5)   |
| C(53)-C(63)-C(21)   | 122.1(5)   |
| C(13)-C(63)-C(21)   | 117.6(4)   |
| O(130)-K(1)-O(190)  | 90.5(3)    |
| O(130)-K(1)-O(240)  | 92.9(2)    |
| O(190)-K(1)-O(240)  | 168.2(3)   |
| O(130)-K(1)-O(10)   | 121.59(16) |
| O(190)-K(1)-O(10)   | 93.7(2)    |
| O(240)-K(1)-O(10)   | 94.2(2)    |
| O(130)-K(1)-O(160)  | 61.53(16)  |
| O(190)-K(1)-O(160)  | 108.1(3)   |
| O(240)-K(1)-O(160)  | 83.39(19)  |
| O(10)-K(1)-O(160)   | 61.92(15)  |
| O(130)-K(1)-O(70)   | 117.36(18) |
| O(190)-K(1)-O(70)   | 78.9(3)    |
| O(240)-K(1)-O(70)   | 89.5(2)    |
| O(10)-K(1)-O(70)    | 120.61(17) |
| O(160)-K(1)-O(70)   | 172.65(16) |
| O(130)-K(1)-O(40)   | 175.62(18) |
| O(190)-K(1)-O(40)   | 92.4(3)    |
| O(240)-K(1)-O(40)   | 83.7(2)    |
| O(10)-K(1)-O(40)    | 61.55(16)  |
| O(160)-K(1)-O(40)   | 120.52(16) |
| O(70)-K(1)-O(40)    | 60.05(17)  |
| O(130)-K(1)-O(100)  | 58.46(16)  |
| O(190)-K(1)-O(100)  | 83.6(2)    |
| O(240)-K(1)-O(100)  | 88.4(2)    |
| O(10)-K(1)-O(100)   | 177.32(16) |
| O(160)-K(1)-O(100)  | 118.78(16) |
| O(70)-K(1)-O(100)   | 59.05(17)  |
| O(40)-K(1)-O(100)   | 118.58(17) |
| C(180)-O(10)-C(20)  | 115.1(6)   |
| C(180)-O(10)-K(1)   | 113.1(4)   |
| C(20)-O(10)-K(1)    | 116.9(4)   |
| O(10)-C(20)-C(30)   | 107.2(7)   |
| O(10)-C(20)-K(1)    | 42.8(3)    |
| C(30)-C(20)-K(1)    | 72.1(4)    |
| O(10)-C(20)-H(20A)  | 110.3      |
| C(30)-C(20)-H(20A)  | 110.3      |
| K(1)-C(20)-H(20A)   | 146.9      |
| O(10)-C(20)-H(20B)  | 110.3      |
| C(30)-C(20)-H(20B)  | 110.3      |
| K(1)-C(20)-H(20B)   | 100.7      |
| H(20A)-C(20)-H(20B) | 108.5      |
| O(40)-C(30)-C(20)   | 117.4(8)   |
| O(40)-C(30)-K(1)    | 50.2(4)    |
| C(20)-C(30)-K(1)    | 83.7(5)    |
| O(40)-C(30)-H(30A)  | 107.9      |



|                      |          |
|----------------------|----------|
| C(20)-C(30)-H(30A)   | 107.9    |
| K(1)-C(30)-H(30A)    | 157.8    |
| O(40)-C(30)-H(30B)   | 107.9    |
| C(20)-C(30)-H(30B)   | 107.9    |
| K(1)-C(30)-H(30B)    | 86.0     |
| H(30A)-C(30)-H(30B)  | 107.2    |
| C(30)-O(40)-C(50)    | 116.9(6) |
| C(30)-O(40)-K(1)     | 108.6(5) |
| C(50)-O(40)-K(1)     | 113.4(4) |
| O(40)-C(50)-C(60)    | 109.6(6) |
| O(40)-C(50)-K(1)     | 45.7(3)  |
| C(60)-C(50)-K(1)     | 77.6(4)  |
| O(40)-C(50)-H(50A)   | 109.8    |
| C(60)-C(50)-H(50A)   | 109.8    |
| K(1)-C(50)-H(50A)    | 91.9     |
| O(40)-C(50)-H(50B)   | 109.8    |
| C(60)-C(50)-H(50B)   | 109.8    |
| K(1)-C(50)-H(50B)    | 153.7    |
| H(50A)-C(50)-H(50B)  | 108.2    |
| O(70)-C(60)-C(50)    | 108.8(7) |
| O(70)-C(60)-K(1)     | 45.2(4)  |
| C(50)-C(60)-K(1)     | 78.9(4)  |
| O(70)-C(60)-H(60A)   | 109.9    |
| C(50)-C(60)-H(60A)   | 109.9    |
| K(1)-C(60)-H(60A)    | 90.1     |
| O(70)-C(60)-H(60B)   | 109.9    |
| C(50)-C(60)-H(60B)   | 109.9    |
| K(1)-C(60)-H(60B)    | 154.2    |
| H(60A)-C(60)-H(60B)  | 108.3    |
| C(80)-O(70)-C(60)    | 115.1(7) |
| C(80)-O(70)-K(1)     | 116.5(5) |
| C(60)-O(70)-K(1)     | 114.0(5) |
| O(70)-C(80)-C(90)    | 109.6(7) |
| O(70)-C(80)-K(1)     | 43.5(3)  |
| C(90)-C(80)-K(1)     | 78.5(5)  |
| O(70)-C(80)-H(80A)   | 109.7    |
| C(90)-C(80)-H(80A)   | 109.7    |
| K(1)-C(80)-H(80A)    | 151.3    |
| O(70)-C(80)-H(80B)   | 109.7    |
| C(90)-C(80)-H(80B)   | 109.7    |
| K(1)-C(80)-H(80B)    | 93.7     |
| H(80A)-C(80)-H(80B)  | 108.2    |
| O(100)-C(90)-C(80)   | 109.9(8) |
| O(100)-C(90)-K(1)    | 48.4(4)  |
| C(80)-C(90)-K(1)     | 78.3(5)  |
| O(100)-C(90)-H(90A)  | 109.7    |
| C(80)-C(90)-H(90A)   | 109.7    |
| K(1)-C(90)-H(90A)    | 157.2    |
| O(100)-C(90)-H(90B)  | 109.7    |
| C(80)-C(90)-H(90B)   | 109.7    |
| K(1)-C(90)-H(90B)    | 87.9     |
| H(90A)-C(90)-H(90B)  | 108.2    |
| C(110)-O(100)-C(90)  | 116.5(7) |
| C(110)-O(100)-K(1)   | 109.2(5) |
| C(90)-O(100)-K(1)    | 110.8(5) |
| O(100)-C(110)-C(120) | 109.2(8) |

|                      |          |
|----------------------|----------|
| O(100)-C(110)-K(1)   | 49.6(4)  |
| C(120)-C(110)-K(1)   | 77.9(5)  |
| O(100)-C(110)-H(11A) | 109.8    |
| C(120)-C(110)-H(11A) | 109.8    |
| K(1)-C(110)-H(11A)   | 86.2     |
| O(100)-C(110)-H(11B) | 109.8    |
| C(120)-C(110)-H(11B) | 109.8    |
| K(1)-C(110)-H(11B)   | 158.9    |
| H(11A)-C(110)-H(11B) | 108.3    |
| O(130)-C(120)-C(110) | 111.2(7) |
| O(130)-C(120)-K(1)   | 40.1(4)  |
| C(110)-C(120)-K(1)   | 78.5(5)  |
| O(130)-C(120)-H(12A) | 109.4    |
| C(110)-C(120)-H(12A) | 109.4    |
| K(1)-C(120)-H(12A)   | 100.6    |
| O(130)-C(120)-H(12B) | 109.4    |
| C(110)-C(120)-H(12B) | 109.4    |
| K(1)-C(120)-H(12B)   | 145.0    |
| H(12A)-C(120)-H(12B) | 108.0    |
| C(120)-O(130)-C(140) | 113.3(6) |
| C(120)-O(130)-K(1)   | 121.4(5) |
| C(140)-O(130)-K(1)   | 115.3(4) |
| O(130)-C(140)-C(150) | 107.3(6) |
| O(130)-C(140)-K(1)   | 43.6(3)  |
| C(150)-C(140)-K(1)   | 77.2(4)  |
| O(130)-C(140)-H(14A) | 110.2    |
| C(150)-C(140)-H(14A) | 110.2    |
| K(1)-C(140)-H(14A)   | 152.2    |
| O(130)-C(140)-H(14B) | 110.2    |
| C(150)-C(140)-H(14B) | 110.2    |
| K(1)-C(140)-H(14B)   | 92.7     |
| H(14A)-C(140)-H(14B) | 108.5    |
| O(160)-C(150)-C(140) | 111.3(5) |
| O(160)-C(150)-K(1)   | 47.6(3)  |
| C(140)-C(150)-K(1)   | 79.0(4)  |
| O(160)-C(150)-H(15G) | 109.4    |
| C(140)-C(150)-H(15G) | 109.4    |
| K(1)-C(150)-H(15G)   | 156.0    |
| O(160)-C(150)-H(15H) | 109.4    |
| C(140)-C(150)-H(15H) | 109.4    |
| K(1)-C(150)-H(15H)   | 89.3     |
| H(15G)-C(150)-H(15H) | 108.0    |
| C(150)-O(160)-C(170) | 113.2(5) |
| C(150)-O(160)-K(1)   | 110.5(4) |
| C(170)-O(160)-K(1)   | 112.8(4) |
| O(160)-C(170)-C(180) | 107.5(5) |
| O(160)-C(170)-K(1)   | 45.5(3)  |
| C(180)-C(170)-K(1)   | 76.5(4)  |
| O(160)-C(170)-H(17A) | 110.2    |
| C(180)-C(170)-H(17A) | 110.2    |
| K(1)-C(170)-H(17A)   | 91.3     |
| O(160)-C(170)-H(17B) | 110.2    |
| C(180)-C(170)-H(17B) | 110.2    |
| K(1)-C(170)-H(17B)   | 154.1    |
| H(17A)-C(170)-H(17B) | 108.5    |
| O(10)-C(180)-C(170)  | 113.0(7) |

|                      |           |
|----------------------|-----------|
| O(10)-C(180)-K(1)    | 45.6(3)   |
| C(170)-C(180)-K(1)   | 79.7(4)   |
| O(10)-C(180)-H(18G)  | 109.0     |
| C(170)-C(180)-H(18G) | 109.0     |
| K(1)-C(180)-H(18G)   | 92.9      |
| O(10)-C(180)-H(18H)  | 109.0     |
| C(170)-C(180)-H(18H) | 109.0     |
| K(1)-C(180)-H(18H)   | 152.6     |
| H(18G)-C(180)-H(18H) | 107.8     |
| C(230)-O(190)-C(200) | 107.2(12) |
| C(230)-O(190)-K(1)   | 124.8(8)  |
| C(200)-O(190)-K(1)   | 125.3(11) |
| C(210)-C(200)-O(190) | 104.5(16) |
| C(210)-C(200)-K(1)   | 140.1(13) |
| O(190)-C(200)-K(1)   | 36.0(7)   |
| C(210)-C(200)-H(20C) | 110.8     |
| O(190)-C(200)-H(20C) | 110.8     |
| K(1)-C(200)-H(20C)   | 94.9      |
| C(210)-C(200)-H(20D) | 110.8     |
| O(190)-C(200)-H(20D) | 110.8     |
| K(1)-C(200)-H(20D)   | 87.4      |
| H(20C)-C(200)-H(20D) | 108.9     |
| C(220)-C(210)-C(200) | 112.2(16) |
| C(220)-C(210)-H(21G) | 109.2     |
| C(200)-C(210)-H(21G) | 109.2     |
| C(220)-C(210)-H(21H) | 109.2     |
| C(200)-C(210)-H(21H) | 109.2     |
| H(21G)-C(210)-H(21H) | 107.9     |
| C(210)-C(220)-C(230) | 105.7(19) |
| C(210)-C(220)-H(22G) | 110.6     |
| C(230)-C(220)-H(22G) | 110.6     |
| C(210)-C(220)-H(22H) | 110.6     |
| C(230)-C(220)-H(22H) | 110.6     |
| H(22G)-C(220)-H(22H) | 108.7     |
| O(190)-C(230)-C(220) | 109.0(15) |
| O(190)-C(230)-K(1)   | 36.8(5)   |
| C(220)-C(230)-K(1)   | 145.5(14) |
| O(190)-C(230)-H(23A) | 109.9     |
| C(220)-C(230)-H(23A) | 109.9     |
| K(1)-C(230)-H(23A)   | 92.3      |
| O(190)-C(230)-H(23B) | 109.9     |
| C(220)-C(230)-H(23B) | 109.9     |
| K(1)-C(230)-H(23B)   | 86.4      |
| H(23A)-C(230)-H(23B) | 108.3     |
| C(250)-O(240)-C(280) | 108.1(8)  |
| C(250)-O(240)-K(1)   | 122.7(8)  |
| C(280)-O(240)-K(1)   | 121.8(7)  |
| O(240)-C(250)-C(260) | 102.5(10) |
| O(240)-C(250)-K(1)   | 38.3(5)   |
| C(260)-C(250)-K(1)   | 118.7(7)  |
| O(240)-C(250)-H(25A) | 111.3     |
| C(260)-C(250)-H(25A) | 111.3     |
| K(1)-C(250)-H(25A)   | 125.0     |
| O(240)-C(250)-H(25B) | 111.3     |
| C(260)-C(250)-H(25B) | 111.3     |
| K(1)-C(250)-H(25B)   | 73.0      |

|                        |            |
|------------------------|------------|
| H(25A)-C(250)-H(25B)   | 109.2      |
| C(270)-C(260)-C(250)   | 107.3(12)  |
| C(270)-C(260)-H(26A)   | 110.3      |
| C(250)-C(260)-H(26A)   | 110.3      |
| C(270)-C(260)-H(26B)   | 110.3      |
| C(250)-C(260)-H(26B)   | 110.3      |
| H(26A)-C(260)-H(26B)   | 108.5      |
| C(280)-C(270)-C(260)   | 105.8(11)  |
| C(280)-C(270)-H(27A)   | 110.6      |
| C(260)-C(270)-H(27A)   | 110.6      |
| C(280)-C(270)-H(27B)   | 110.6      |
| C(260)-C(270)-H(27B)   | 110.6      |
| H(27A)-C(270)-H(27B)   | 108.7      |
| O(240)-C(280)-C(270)   | 106.5(12)  |
| O(240)-C(280)-K(1)     | 38.8(4)    |
| C(270)-C(280)-K(1)     | 120.4(9)   |
| O(240)-C(280)-H(28A)   | 110.4      |
| C(270)-C(280)-H(28A)   | 110.4      |
| K(1)-C(280)-H(28A)     | 71.6       |
| O(240)-C(280)-H(28B)   | 110.4      |
| C(270)-C(280)-H(28B)   | 110.4      |
| K(1)-C(280)-H(28B)     | 125.5      |
| H(28A)-C(280)-H(28B)   | 108.6      |
| O(380)#1-K(2)-O(380)   | 180.0      |
| O(380)#1-K(2)-O(350)   | 94.5(2)    |
| O(380)-K(2)-O(350)     | 85.5(2)    |
| O(380)#1-K(2)-O(350)#1 | 85.5(2)    |
| O(380)-K(2)-O(350)#1   | 94.5(2)    |
| O(350)-K(2)-O(350)#1   | 180.0      |
| O(380)#1-K(2)-O(320)   | 76.85(18)  |
| O(380)-K(2)-O(320)     | 103.15(18) |
| O(350)-K(2)-O(320)     | 60.0(2)    |
| O(350)#1-K(2)-O(320)   | 120.0(2)   |
| O(380)#1-K(2)-O(320)#1 | 103.15(18) |
| O(380)-K(2)-O(320)#1   | 76.85(19)  |
| O(350)-K(2)-O(320)#1   | 120.0(2)   |
| O(350)#1-K(2)-O(320)#1 | 60.0(2)    |
| O(320)-K(2)-O(320)#1   | 180.0(3)   |
| O(380)#1-K(2)-O(290)#1 | 95.1(2)    |
| O(380)-K(2)-O(290)#1   | 84.9(2)    |
| O(350)-K(2)-O(290)#1   | 61.1(2)    |
| O(350)#1-K(2)-O(290)#1 | 118.9(2)   |
| O(320)-K(2)-O(290)#1   | 119.5(2)   |
| O(320)#1-K(2)-O(290)#1 | 60.5(2)    |
| O(380)#1-K(2)-O(290)   | 84.9(2)    |
| O(380)-K(2)-O(290)     | 95.1(2)    |
| O(350)-K(2)-O(290)     | 118.9(2)   |
| O(350)#1-K(2)-O(290)   | 61.1(2)    |
| O(320)-K(2)-O(290)     | 60.5(2)    |
| O(320)#1-K(2)-O(290)   | 119.5(2)   |
| O(290)#1-K(2)-O(290)   | 180.0      |
| C(370)-O(290)-C(300)   | 113.7(9)   |
| C(370)-O(290)-K(2)     | 110.7(6)   |
| C(300)-O(290)-K(2)     | 112.6(6)   |
| O(290)-C(300)-C(310)   | 110.3(8)   |
| O(290)-C(300)-K(2)     | 46.2(4)    |

|                        |           |
|------------------------|-----------|
| C(310)-C(300)-K(2)     | 76.7(5)   |
| O(290)-C(300)-H(30C)   | 109.6     |
| C(310)-C(300)-H(30C)   | 109.6     |
| K(2)-C(300)-H(30C)     | 93.1      |
| O(290)-C(300)-H(30D)   | 109.6     |
| C(310)-C(300)-H(30D)   | 109.6     |
| K(2)-C(300)-H(30D)     | 153.4     |
| H(30C)-C(300)-H(30D)   | 108.1     |
| O(320)-C(310)-C(300)   | 111.8(9)  |
| O(320)-C(310)-K(2)     | 44.7(4)   |
| C(300)-C(310)-K(2)     | 79.8(5)   |
| O(320)-C(310)-H(31A)   | 109.3     |
| C(300)-C(310)-H(31A)   | 109.3     |
| K(2)-C(310)-H(31A)     | 92.6      |
| O(320)-C(310)-H(31B)   | 109.3     |
| C(300)-C(310)-H(31B)   | 109.3     |
| K(2)-C(310)-H(31B)     | 152.3     |
| H(31A)-C(310)-H(31B)   | 107.9     |
| C(310)-O(320)-C(330)   | 113.0(8)  |
| C(310)-O(320)-K(2)     | 115.0(6)  |
| C(330)-O(320)-K(2)     | 114.4(5)  |
| O(320)-C(330)-C(340)   | 108.7(7)  |
| O(320)-C(330)-K(2)     | 44.6(4)   |
| C(340)-C(330)-K(2)     | 76.2(5)   |
| O(320)-C(330)-H(33A)   | 109.9     |
| C(340)-C(330)-H(33A)   | 109.9     |
| K(2)-C(330)-H(33A)     | 151.9     |
| O(320)-C(330)-H(33B)   | 109.9     |
| C(340)-C(330)-H(33B)   | 109.9     |
| K(2)-C(330)-H(33B)     | 94.2      |
| H(33A)-C(330)-H(33B)   | 108.3     |
| O(350)-C(340)-C(330)   | 108.6(9)  |
| O(350)-C(340)-K(2)     | 43.7(4)   |
| C(330)-C(340)-K(2)     | 79.2(5)   |
| O(350)-C(340)-H(34A)   | 110.0     |
| C(330)-C(340)-H(34A)   | 110.0     |
| K(2)-C(340)-H(34A)     | 152.6     |
| O(350)-C(340)-H(34B)   | 110.0     |
| C(330)-C(340)-H(34B)   | 110.0     |
| K(2)-C(340)-H(34B)     | 91.4      |
| H(34A)-C(340)-H(34B)   | 108.3     |
| C(340)-O(350)-C(360)   | 109.8(9)  |
| C(340)-O(350)-K(2)     | 117.0(6)  |
| C(360)-O(350)-K(2)     | 115.1(6)  |
| O(350)-C(360)-C(370)#1 | 107.7(9)  |
| O(350)-C(360)-K(2)     | 43.9(4)   |
| C(370)#1-C(360)-K(2)   | 75.4(6)   |
| O(350)-C(360)-H(36A)   | 110.2     |
| C(370)#1-C(360)-H(36A) | 110.2     |
| K(2)-C(360)-H(36A)     | 95.1      |
| O(350)-C(360)-H(36B)   | 110.2     |
| C(370)#1-C(360)-H(36B) | 110.2     |
| K(2)-C(360)-H(36B)     | 151.1     |
| H(36A)-C(360)-H(36B)   | 108.5     |
| O(290)-C(370)-C(360)#1 | 111.7(10) |
| O(290)-C(370)-K(2)     | 48.3(4)   |

|                        |            |
|------------------------|------------|
| C(360)#1-C(370)-K(2)   | 80.4(6)    |
| O(290)-C(370)-H(37A)   | 109.3      |
| C(360)#1-C(370)-H(37A) | 109.3      |
| K(2)-C(370)-H(37A)     | 157.1      |
| O(290)-C(370)-H(37B)   | 109.3      |
| C(360)#1-C(370)-H(37B) | 109.3      |
| K(2)-C(370)-H(37B)     | 87.1       |
| H(37A)-C(370)-H(37B)   | 107.9      |
| C(400)-C(390)-O(380)   | 113.0(12)  |
| C(400)-C(390)-K(2)     | 116.9(9)   |
| O(380)-C(390)-K(2)     | 32.9(4)    |
| C(400)-C(390)-H(39A)   | 109.0      |
| O(380)-C(390)-H(39A)   | 109.0      |
| K(2)-C(390)-H(39A)     | 129.1      |
| C(400)-C(390)-H(39B)   | 109.0      |
| O(380)-C(390)-H(39B)   | 109.0      |
| K(2)-C(390)-H(39B)     | 77.4       |
| H(39A)-C(390)-H(39B)   | 107.8      |
| C(390)-C(400)-C(410)   | 103.4(13)  |
| C(390)-C(400)-H(40A)   | 111.1      |
| C(410)-C(400)-H(40A)   | 111.1      |
| C(390)-C(400)-H(40B)   | 111.1      |
| C(410)-C(400)-H(40B)   | 111.1      |
| H(40A)-C(400)-H(40B)   | 109.1      |
| C(400)-C(410)-C(420)   | 109.4(13)  |
| C(400)-C(410)-K(2)     | 95.1(9)    |
| C(420)-C(410)-K(2)     | 50.2(6)    |
| C(400)-C(410)-H(41A)   | 109.8      |
| C(420)-C(410)-H(41A)   | 109.8      |
| K(2)-C(410)-H(41A)     | 70.4       |
| C(400)-C(410)-H(41B)   | 109.8      |
| C(420)-C(410)-H(41B)   | 109.8      |
| K(2)-C(410)-H(41B)     | 153.2      |
| H(41A)-C(410)-H(41B)   | 108.2      |
| O(380)-C(420)-C(410)   | 98.3(9)    |
| O(380)-C(420)-K(2)     | 47.8(5)    |
| C(410)-C(420)-K(2)     | 110.4(7)   |
| O(380)-C(420)-H(42A)   | 112.1      |
| C(410)-C(420)-H(42A)   | 112.1      |
| K(2)-C(420)-H(42A)     | 135.3      |
| O(380)-C(420)-H(42B)   | 112.1      |
| C(410)-C(420)-H(42B)   | 112.1      |
| K(2)-C(420)-H(42B)     | 64.8       |
| H(42A)-C(420)-H(42B)   | 109.7      |
| C(390)-O(380)-C(420)   | 103.4(8)   |
| C(390)-O(380)-K(2)     | 131.1(6)   |
| C(420)-O(380)-K(2)     | 109.4(6)   |
| O(520)#2-K(3)-O(520)   | 180.0      |
| O(520)#2-K(3)-O(460)   | 85.27(16)  |
| O(520)-K(3)-O(460)     | 94.74(16)  |
| O(520)#2-K(3)-O(460)#2 | 94.73(16)  |
| O(520)-K(3)-O(460)#2   | 85.26(16)  |
| O(460)-K(3)-O(460)#2   | 180.0      |
| O(520)#2-K(3)-O(430)#2 | 85.53(18)  |
| O(520)-K(3)-O(430)#2   | 94.47(18)  |
| O(460)-K(3)-O(430)#2   | 118.93(10) |

|                        |            |
|------------------------|------------|
| O(460)#2-K(3)-O(430)#2 | 61.07(10)  |
| O(520)#2-K(3)-O(430)   | 94.47(18)  |
| O(520)-K(3)-O(430)     | 85.53(18)  |
| O(460)-K(3)-O(430)     | 61.07(10)  |
| O(460)#2-K(3)-O(430)   | 118.94(10) |
| O(430)#2-K(3)-O(430)   | 180.00(8)  |
| O(520)#2-K(3)-O(490)#2 | 87.54(17)  |
| O(520)-K(3)-O(490)#2   | 92.46(17)  |
| O(460)-K(3)-O(490)#2   | 119.38(10) |
| O(460)#2-K(3)-O(490)#2 | 60.62(10)  |
| O(430)#2-K(3)-O(490)#2 | 120.32(10) |
| O(430)-K(3)-O(490)#2   | 59.68(10)  |
| O(520)#2-K(3)-O(490)   | 92.47(17)  |
| O(520)-K(3)-O(490)     | 87.54(17)  |
| O(460)-K(3)-O(490)     | 60.62(10)  |
| O(460)#2-K(3)-O(490)   | 119.37(10) |
| O(430)#2-K(3)-O(490)   | 59.67(10)  |
| O(430)-K(3)-O(490)     | 120.33(10) |
| O(490)#2-K(3)-O(490)   | 180.00(16) |
| C(510)#2-O(430)-C(440) | 112.0(4)   |
| C(510)#2-O(430)-K(3)   | 114.9(3)   |
| C(440)-O(430)-K(3)     | 111.0(3)   |
| O(430)-C(440)-C(450)   | 107.9(5)   |
| O(430)-C(440)-K(3)     | 47.0(2)    |
| C(450)-C(440)-K(3)     | 78.0(3)    |
| O(430)-C(440)-H(44A)   | 110.1      |
| C(450)-C(440)-H(44A)   | 110.1      |
| K(3)-C(440)-H(44A)     | 156.4      |
| O(430)-C(440)-H(44B)   | 110.1      |
| C(450)-C(440)-H(44B)   | 110.1      |
| K(3)-C(440)-H(44B)     | 88.2       |
| H(44A)-C(440)-H(44B)   | 108.4      |
| O(460)-C(450)-C(440)   | 108.6(4)   |
| O(460)-C(450)-K(3)     | 43.5(2)    |
| C(440)-C(450)-K(3)     | 78.2(3)    |
| O(460)-C(450)-H(45A)   | 110.0      |
| C(440)-C(450)-H(45A)   | 110.0      |
| K(3)-C(450)-H(45A)     | 151.7      |
| O(460)-C(450)-H(45B)   | 110.0      |
| C(440)-C(450)-H(45B)   | 110.0      |
| K(3)-C(450)-H(45B)     | 93.1       |
| H(45A)-C(450)-H(45B)   | 108.3      |
| O(460)-C(470)-C(480)   | 108.0(4)   |
| O(460)-C(470)-K(3)     | 43.1(2)    |
| C(480)-C(470)-K(3)     | 78.7(3)    |
| O(460)-C(470)-H(47A)   | 110.1      |
| C(480)-C(470)-H(47A)   | 110.1      |
| K(3)-C(470)-H(47A)     | 92.2       |
| O(460)-C(470)-H(47B)   | 110.1      |
| C(480)-C(470)-H(47B)   | 110.1      |
| K(3)-C(470)-H(47B)     | 152.0      |
| H(47A)-C(470)-H(47B)   | 108.4      |
| O(490)-C(480)-C(470)   | 109.3(4)   |
| O(490)-C(480)-K(3)     | 45.9(2)    |
| C(470)-C(480)-K(3)     | 77.8(3)    |
| O(490)-C(480)-H(48A)   | 109.8      |

|                        |           |
|------------------------|-----------|
| C(470)-C(480)-H(48A)   | 109.8     |
| K(3)-C(480)-H(48A)     | 91.0      |
| O(490)-C(480)-H(48B)   | 109.8     |
| C(470)-C(480)-H(48B)   | 109.8     |
| K(3)-C(480)-H(48B)     | 154.3     |
| H(48A)-C(480)-H(48B)   | 108.3     |
| C(500)-O(490)-C(480)   | 112.5(4)  |
| C(500)-O(490)-K(3)     | 114.8(3)  |
| C(480)-O(490)-K(3)     | 112.9(3)  |
| O(490)-C(500)-C(510)   | 107.6(5)  |
| O(490)-C(500)-K(3)     | 44.6(2)   |
| C(510)-C(500)-K(3)     | 78.1(3)   |
| O(490)-C(500)-H(50C)   | 110.2     |
| C(510)-C(500)-H(50C)   | 110.2     |
| K(3)-C(500)-H(50C)     | 153.7     |
| O(490)-C(500)-H(50D)   | 110.2     |
| C(510)-C(500)-H(50D)   | 110.2     |
| K(3)-C(500)-H(50D)     | 90.7      |
| H(50C)-C(500)-H(50D)   | 108.5     |
| O(430)#2-C(510)-C(500) | 108.0(5)  |
| O(430)#2-C(510)-K(3)   | 44.3(2)   |
| C(500)-C(510)-K(3)     | 78.1(3)   |
| O(430)#2-C(510)-H(51A) | 110.1     |
| C(500)-C(510)-H(51A)   | 110.1     |
| K(3)-C(510)-H(51A)     | 153.2     |
| O(430)#2-C(510)-H(51B) | 110.1     |
| C(500)-C(510)-H(51B)   | 110.1     |
| K(3)-C(510)-H(51B)     | 91.4      |
| H(51A)-C(510)-H(51B)   | 108.4     |
| C(560)-O(520)-C(530)   | 107.8(9)  |
| C(560)-O(520)-K(3)     | 121.7(7)  |
| C(530)-O(520)-K(3)     | 123.8(7)  |
| O(520)-C(530)-C(540)   | 103.5(10) |
| O(520)-C(530)-K(3)     | 37.8(5)   |
| C(540)-C(530)-K(3)     | 127.4(9)  |
| O(520)-C(530)-H(53A)   | 111.1     |
| C(540)-C(530)-H(53A)   | 111.1     |
| K(3)-C(530)-H(53A)     | 116.0     |
| O(520)-C(530)-H(53B)   | 111.1     |
| C(540)-C(530)-H(53B)   | 111.1     |
| K(3)-C(530)-H(53B)     | 74.6      |
| H(53A)-C(530)-H(53B)   | 109.0     |
| C(550)-C(540)-C(530)   | 106.3(14) |
| C(550)-C(540)-H(54A)   | 110.5     |
| C(530)-C(540)-H(54A)   | 110.5     |
| C(550)-C(540)-H(54B)   | 110.5     |
| C(530)-C(540)-H(54B)   | 110.5     |
| H(54A)-C(540)-H(54B)   | 108.7     |
| C(560)-C(550)-C(540)   | 108.4(15) |
| C(560)-C(550)-H(55A)   | 110.0     |
| C(540)-C(550)-H(55A)   | 110.0     |
| C(560)-C(550)-H(55B)   | 110.0     |
| C(540)-C(550)-H(55B)   | 110.0     |
| H(55A)-C(550)-H(55B)   | 108.4     |
| O(520)-C(560)-C(550)   | 111.2(13) |
| O(520)-C(560)-K(3)     | 40.0(5)   |



|                      |           |
|----------------------|-----------|
| C(550)-C(560)-K(3)   | 136.9(13) |
| O(520)-C(560)-H(56A) | 109.4     |
| C(550)-C(560)-H(56A) | 109.4     |
| K(3)-C(560)-H(56A)   | 71.3      |
| O(520)-C(560)-H(56B) | 109.4     |
| C(550)-C(560)-H(56B) | 109.4     |
| K(3)-C(560)-H(56B)   | 111.0     |
| H(56A)-C(560)-H(56B) | 108.0     |
| C(450)-O(460)-C(470) | 112.4(4)  |
| C(450)-O(460)-K(3)   | 115.8(3)  |
| C(470)-O(460)-K(3)   | 115.8(3)  |

Symmetry transformations used to generate equivalent atoms:

#1 -x+1,-y+2,-z+1 #2 -x+2,-y+1,-z+1

**Anisotropic displacement parameters ( $\text{\AA}^2 \times 10^3$ ) for [LFeN<sub>2</sub>][K(18-crown-6)(THF)<sub>2</sub>]<sub>2</sub> (3). The anisotropic displacement factor exponent takes the form:  $-2\pi^2 [h^2 a^{*2} U^{11} + \dots + 2 h k a^* b^* U^{12}]$**

|        | U <sup>11</sup> | U <sup>22</sup> | U <sup>33</sup> | U <sup>23</sup> | U <sup>13</sup> | U <sup>12</sup> |
|--------|-----------------|-----------------|-----------------|-----------------|-----------------|-----------------|
| Fe(1)  | 58(1)           | 81(1)           | 62(1)           | -13(1)          | -1(1)           | -21(1)          |
| N(1)   | 85(3)           | 66(3)           | 85(3)           | -14(2)          | 24(3)           | -32(2)          |
| N(2)   | 169(6)          | 89(4)           | 127(5)          | -15(4)          | 66(5)           | -50(4)          |
| S(11)  | 60(1)           | 87(1)           | 76(1)           | -25(1)          | -7(1)           | -11(1)          |
| S(21)  | 56(1)           | 77(1)           | 71(1)           | -14(1)          | -13(1)          | -27(1)          |
| C(11)  | 61(3)           | 60(3)           | 65(3)           | -6(2)           | -1(2)           | -24(2)          |
| C(21)  | 71(3)           | 65(3)           | 56(3)           | -7(2)           | -3(2)           | -25(3)          |
| C(31)  | 67(3)           | 77(3)           | 75(4)           | -12(3)          | -16(3)          | -20(3)          |
| C(41)  | 58(3)           | 74(3)           | 88(4)           | -11(3)          | -8(3)           | -17(3)          |
| C(51)  | 62(3)           | 71(3)           | 72(3)           | -17(3)          | 5(3)            | -24(3)          |
| C(61)  | 57(3)           | 61(3)           | 61(3)           | -12(2)          | 4(2)            | -24(2)          |
| F(71)  | 83(2)           | 99(2)           | 96(2)           | -21(2)          | -28(2)          | -20(2)          |
| C(81)  | 56(3)           | 66(3)           | 69(3)           | -21(3)          | 12(2)           | -22(2)          |
| C(91)  | 67(3)           | 74(3)           | 66(3)           | -21(3)          | 6(3)            | -28(3)          |
| C(101) | 83(4)           | 90(4)           | 66(3)           | -10(3)          | -6(3)           | -45(3)          |
| C(111) | 81(4)           | 96(4)           | 69(4)           | -17(3)          | -3(3)           | -39(3)          |
| C(121) | 73(4)           | 80(4)           | 97(4)           | -28(3)          | 2(3)            | -36(3)          |
| C(131) | 67(3)           | 66(3)           | 80(4)           | -18(3)          | 6(3)            | -23(3)          |
| C(141) | 84(4)           | 88(4)           | 65(3)           | -9(3)           | -4(3)           | -51(3)          |
| C(151) | 78(4)           | 111(5)          | 88(4)           | -6(4)           | -3(3)           | -47(4)          |
| C(161) | 91(4)           | 82(4)           | 104(5)          | -9(3)           | -8(4)           | -42(3)          |
| C(171) | 126(6)          | 147(7)          | 91(5)           | -27(5)          | -8(4)           | -88(6)          |
| C(181) | 144(8)          | 166(9)          | 144(8)          | -14(7)          | -77(6)          | -43(7)          |
| C(191) | 207(12)         | 283(15)         | 140(9)          | -121(10)        | -21(8)          | -76(11)         |
| C(201) | 84(4)           | 78(4)           | 94(4)           | -4(3)           | -7(3)           | -39(3)          |
| C(211) | 132(7)          | 83(5)           | 180(9)          | 0(5)            | -2(6)           | -32(5)          |
| C(221) | 101(5)          | 122(6)          | 113(5)          | 5(4)            | 5(4)            | -55(4)          |
| C(12)  | 46(2)           | 75(3)           | 53(3)           | -19(2)          | -1(2)           | -24(2)          |
| C(22)  | 50(3)           | 70(3)           | 56(3)           | -15(2)          | -5(2)           | -13(2)          |

|        |         |         |         |         |          |         |
|--------|---------|---------|---------|---------|----------|---------|
| C(32)  | 51(3)   | 82(4)   | 67(3)   | -18(3)  | -17(2)   | -14(2)  |
| C(42)  | 61(3)   | 91(4)   | 84(4)   | -33(3)  | -8(3)    | -28(3)  |
| C(52)  | 62(3)   | 75(3)   | 74(3)   | -23(3)  | 3(3)     | -26(3)  |
| C(62)  | 53(3)   | 69(3)   | 62(3)   | -12(2)  | -7(2)    | -21(2)  |
| F(72)  | 67(2)   | 103(2)  | 96(2)   | -21(2)  | -36(2)   | -18(2)  |
| C(82)  | 57(3)   | 69(3)   | 67(3)   | -11(3)  | -5(2)    | -22(2)  |
| C(92)  | 68(3)   | 76(3)   | 70(3)   | -6(3)   | -7(3)    | -22(3)  |
| C(102) | 79(4)   | 82(4)   | 65(3)   | -4(3)   | -9(3)    | -22(3)  |
| C(112) | 78(4)   | 81(4)   | 78(4)   | -3(3)   | -18(3)   | -29(3)  |
| C(122) | 59(3)   | 78(4)   | 92(4)   | -12(3)  | -12(3)   | -11(3)  |
| C(132) | 58(3)   | 70(3)   | 73(3)   | -8(3)   | -4(3)    | -15(3)  |
| C(142) | 70(3)   | 96(4)   | 62(3)   | -9(3)   | 4(3)     | -15(3)  |
| C(152) | 101(5)  | 93(4)   | 96(5)   | -26(4)  | 18(4)    | -28(4)  |
| C(162) | 82(4)   | 128(5)  | 91(4)   | -27(4)  | 7(3)     | -41(4)  |
| C(172) | 91(5)   | 88(4)   | 92(4)   | 6(4)    | -34(4)   | -12(3)  |
| C(182) | 142(9)  | 202(11) | 243(13) | 86(10)  | -113(9)  | -88(8)  |
| C(192) | 215(11) | 95(6)   | 203(11) | 29(6)   | -123(9)  | -16(6)  |
| C(202) | 59(3)   | 84(4)   | 75(4)   | -12(3)  | -5(3)    | -7(3)   |
| C(212) | 77(4)   | 108(5)  | 104(5)  | -19(4)  | 11(3)    | -34(4)  |
| C(222) | 81(4)   | 124(5)  | 88(4)   | -35(4)  | -2(3)    | -28(4)  |
| C(13)  | 58(3)   | 80(3)   | 47(3)   | -8(2)   | -11(2)   | -23(2)  |
| C(23)  | 62(3)   | 73(3)   | 57(3)   | -12(3)  | -7(2)    | -13(2)  |
| C(33)  | 84(4)   | 92(4)   | 58(3)   | -19(3)  | -7(3)    | -12(3)  |
| C(43)  | 113(5)  | 82(4)   | 60(3)   | -2(3)   | -22(3)   | -20(4)  |
| C(53)  | 106(5)  | 73(4)   | 74(4)   | -5(3)   | -24(3)   | -17(3)  |
| C(63)  | 76(3)   | 66(3)   | 60(3)   | -5(3)   | -10(3)   | -20(3)  |
| K(1)   | 54(1)   | 89(1)   | 101(1)  | -26(1)  | 0(1)     | -27(1)  |
| O(10)  | 105(4)  | 99(3)   | 111(4)  | -19(3)  | -8(3)    | -30(3)  |
| C(20)  | 94(5)   | 104(5)  | 163(8)  | -38(5)  | -8(5)    | -10(5)  |
| C(30)  | 131(7)  | 99(5)   | 134(7)  | -13(5)  | 4(5)     | -24(5)  |
| O(40)  | 87(3)   | 118(4)  | 124(4)  | -34(3)  | 6(3)     | -26(3)  |
| C(50)  | 63(4)   | 112(5)  | 115(5)  | -1(4)   | 13(3)    | -36(4)  |
| C(60)  | 83(5)   | 168(8)  | 112(6)  | -23(6)  | 4(4)     | -42(5)  |
| O(70)  | 89(3)   | 139(4)  | 134(4)  | -17(4)  | -9(3)    | -45(3)  |
| C(80)  | 138(7)  | 131(7)  | 128(6)  | -42(5)  | 3(5)     | -83(6)  |
| C(90)  | 126(7)  | 143(7)  | 165(9)  | -46(7)  | -4(7)    | -58(7)  |
| O(100) | 114(4)  | 109(4)  | 138(4)  | -12(3)  | -1(3)    | -55(3)  |
| C(110) | 90(6)   | 121(6)  | 217(11) | -59(7)  | -1(6)    | -25(5)  |
| C(120) | 124(7)  | 120(7)  | 169(9)  | -43(6)  | 33(6)    | -35(6)  |
| O(130) | 86(3)   | 106(4)  | 155(5)  | -41(3)  | 20(3)    | -23(3)  |
| C(140) | 62(4)   | 129(6)  | 101(5)  | -14(4)  | 3(3)     | -29(4)  |
| C(150) | 76(4)   | 136(6)  | 108(5)  | -15(5)  | -29(4)   | -34(4)  |
| O(160) | 86(3)   | 118(3)  | 102(3)  | -16(3)  | -17(2)   | -46(3)  |
| C(170) | 101(5)  | 117(5)  | 107(5)  | -24(4)  | -22(4)   | -54(4)  |
| C(180) | 119(6)  | 115(6)  | 123(6)  | -17(5)  | -37(5)   | -43(5)  |
| O(190) | 304(12) | 204(8)  | 127(6)  | -10(5)  | -83(6)   | -81(8)  |
| C(200) | 346(13) | 240(14) | 179(9)  | -78(9)  | -100(9)  | -75(9)  |
| C(210) | 378(17) | 230(14) | 178(9)  | -22(10) | -107(10) | -82(13) |
| C(220) | 394(18) | 350(20) | 157(9)  | 47(11)  | -89(10)  | -92(15) |
| C(230) | 340(14) | 166(10) | 127(8)  | -39(7)  | -69(8)   | -77(9)  |
| O(240) | 163(6)  | 300(9)  | 104(4)  | -49(5)  | -21(4)   | -93(6)  |
| C(250) | 166(8)  | 335(13) | 115(7)  | -70(8)  | -4(6)    | -82(8)  |
| C(260) | 180(9)  | 264(12) | 130(8)  | -28(8)  | -10(7)   | -99(8)  |
| C(270) | 162(8)  | 258(12) | 105(7)  | -6(7)   | -5(6)    | -88(7)  |
| C(280) | 216(10) | 252(10) | 98(7)   | -12(6)  | -23(6)   | -87(7)  |
| K(2)   | 83(1)   | 75(1)   | 78(1)   | -3(1)   | -5(1)    | -25(1)  |

|        |         |         |         |          |          |        |
|--------|---------|---------|---------|----------|----------|--------|
| O(290) | 108(4)  | 121(4)  | 162(5)  | -45(4)   | 17(4)    | -41(3) |
| C(300) | 113(7)  | 130(7)  | 167(9)  | 9(7)     | -42(7)   | -31(6) |
| C(310) | 121(7)  | 125(7)  | 185(10) | -42(7)   | -47(7)   | -12(6) |
| O(320) | 156(5)  | 97(4)   | 142(5)  | -12(4)   | -49(4)   | -30(4) |
| C(330) | 208(11) | 90(5)   | 111(6)  | 19(5)    | -24(6)   | -75(7) |
| C(340) | 209(11) | 108(6)  | 99(6)   | 12(5)    | -21(7)   | -77(7) |
| O(350) | 199(7)  | 112(4)  | 96(4)   | -4(3)    | 5(4)     | -73(4) |
| C(360) | 126(8)  | 158(9)  | 169(10) | -53(8)   | 54(7)    | -48(7) |
| C(370) | 153(9)  | 141(8)  | 204(12) | -39(8)   | 75(9)    | -73(7) |
| C(390) | 206(9)  | 125(7)  | 152(7)  | -20(6)   | -38(6)   | -57(6) |
| C(400) | 264(12) | 138(9)  | 165(8)  | -25(6)   | -14(7)   | -62(8) |
| C(410) | 204(9)  | 138(8)  | 224(9)  | -26(7)   | -20(7)   | -75(7) |
| C(420) | 272(11) | 106(6)  | 181(8)  | -5(6)    | -92(7)   | -53(6) |
| O(380) | 260(8)  | 107(4)  | 133(5)  | -15(4)   | -38(5)   | -52(4) |
| K(3)   | 55(1)   | 106(1)  | 73(1)   | -32(1)   | 3(1)     | -37(1) |
| O(430) | 53(2)   | 116(3)  | 71(2)   | -30(2)   | -2(2)    | -35(2) |
| C(440) | 70(4)   | 124(5)  | 76(4)   | -35(3)   | 1(3)     | -43(3) |
| C(450) | 58(3)   | 115(4)  | 73(3)   | -36(3)   | 4(3)     | -31(3) |
| C(470) | 55(3)   | 92(4)   | 80(4)   | -24(3)   | 4(3)     | -25(3) |
| C(480) | 51(3)   | 93(4)   | 78(4)   | -14(3)   | 2(2)     | -31(3) |
| O(490) | 54(2)   | 104(3)  | 70(2)   | -23(2)   | -1(2)    | -36(2) |
| C(500) | 55(3)   | 123(5)  | 90(4)   | -39(4)   | 2(3)     | -44(3) |
| C(510) | 58(3)   | 138(5)  | 80(4)   | -37(4)   | 0(3)     | -40(3) |
| O(520) | 137(5)  | 115(4)  | 171(6)  | -28(4)   | -3(4)    | -31(4) |
| C(530) | 164(8)  | 146(8)  | 244(13) | -35(8)   | -36(8)   | -56(6) |
| C(540) | 209(10) | 184(9)  | 243(14) | -82(10)  | -11(10)  | -58(8) |
| C(550) | 199(10) | 228(12) | 540(30) | -162(18) | -118(13) | 3(10)  |
| C(560) | 180(8)  | 147(8)  | 256(14) | -11(8)   | -69(8)   | -61(6) |
| O(460) | 48(2)   | 102(3)  | 72(2)   | -34(2)   | 3(2)     | -26(2) |

**Hydrogen coordinates (  $\times 10^4$ ) and isotropic displacement parameters ( $\text{\AA}^2 \times 10^3$ ) for [LFeN<sub>2</sub>][K(18-crown-6)(THF)<sub>2</sub>]<sub>2</sub> (3).**

|        | x    | y    | z     | U(eq) |
|--------|------|------|-------|-------|
| H(41)  | 1922 | 8908 | 7559  | 90    |
| H(51)  | 3046 | 8857 | 8263  | 81    |
| H(101) | 5638 | 7223 | 9802  | 92    |
| H(121) | 6437 | 8844 | 8906  | 95    |
| H(141) | 4140 | 7102 | 8725  | 89    |
| H(15A) | 3666 | 7291 | 9851  | 136   |
| H(15B) | 3060 | 6955 | 9522  | 136   |
| H(15C) | 3000 | 7746 | 9300  | 136   |
| H(16A) | 5637 | 6211 | 9078  | 136   |
| H(16B) | 4635 | 6030 | 9368  | 136   |
| H(16C) | 5323 | 6297 | 9711  | 136   |
| H(171) | 7200 | 8319 | 9795  | 132   |
| H(18A) | 6984 | 7021 | 10337 | 228   |
| H(18B) | 7776 | 7348 | 10530 | 228   |

|        |       |       |       |     |
|--------|-------|-------|-------|-----|
| H(18C) | 7920  | 7140  | 9929  | 228 |
| H(19A) | 5544  | 8797  | 10196 | 294 |
| H(19B) | 6405  | 8394  | 10675 | 294 |
| H(19C) | 5586  | 8043  | 10551 | 294 |
| H(201) | 5066  | 8995  | 7641  | 101 |
| H(21A) | 4175  | 9851  | 8153  | 205 |
| H(21B) | 4840  | 10158 | 7650  | 205 |
| H(21C) | 5253  | 9936  | 8287  | 205 |
| H(22A) | 6933  | 9153  | 7968  | 169 |
| H(22B) | 6490  | 9387  | 7336  | 169 |
| H(22C) | 6895  | 8586  | 7638  | 169 |
| H(42)  | 4328  | 4148  | 6695  | 90  |
| H(52)  | 5639  | 3447  | 7349  | 82  |
| H(102) | 7289  | 3106  | 9226  | 93  |
| H(122) | 9373  | 2752  | 7990  | 95  |
| H(142) | 5287  | 4339  | 8310  | 96  |
| H(15D) | 6183  | 4112  | 9397  | 146 |
| H(15E) | 5061  | 4640  | 9211  | 146 |
| H(15F) | 6073  | 4776  | 8893  | 146 |
| H(16D) | 4983  | 3288  | 8591  | 147 |
| H(16E) | 4391  | 3770  | 9011  | 147 |
| H(16F) | 5447  | 3167  | 9206  | 147 |
| H(172) | 8876  | 2348  | 9480  | 116 |
| H(18D) | 10371 | 2623  | 8754  | 307 |
| H(18E) | 10667 | 2040  | 9325  | 307 |
| H(18F) | 10017 | 2813  | 9354  | 307 |
| H(19D) | 8703  | 1494  | 9164  | 274 |
| H(19E) | 9895  | 1280  | 9336  | 274 |
| H(19F) | 9565  | 1544  | 8683  | 274 |
| H(202) | 7800  | 3979  | 6872  | 93  |
| H(21D) | 9456  | 3931  | 7195  | 144 |
| H(21E) | 9500  | 3767  | 6581  | 144 |
| H(21F) | 9896  | 3152  | 7124  | 144 |
| H(22D) | 8715  | 2529  | 7001  | 145 |
| H(22E) | 8365  | 3069  | 6411  | 145 |
| H(22F) | 7513  | 2931  | 6875  | 145 |
| H(13)  | 4680  | 6370  | 7431  | 74  |
| H(33)  | 5235  | 6121  | 5798  | 97  |
| H(43)  | 4478  | 7274  | 5469  | 106 |
| H(53)  | 3869  | 8019  | 6106  | 105 |
| H(20A) | 12229 | 3828  | 7944  | 148 |
| H(20B) | 12275 | 3960  | 8566  | 148 |
| H(30A) | 13464 | 4368  | 7931  | 152 |
| H(30B) | 12521 | 4880  | 7539  | 152 |
| H(50A) | 13192 | 5762  | 7600  | 120 |
| H(50B) | 14056 | 5266  | 8056  | 120 |
| H(60A) | 13158 | 5889  | 8738  | 146 |
| H(60B) | 13624 | 6347  | 8226  | 146 |
| H(80A) | 12391 | 7386  | 8258  | 145 |
| H(80B) | 11874 | 7031  | 8812  | 145 |
| H(90A) | 10712 | 8050  | 8279  | 167 |
| H(90B) | 10816 | 7665  | 7771  | 167 |
| H(11A) | 9025  | 7714  | 7860  | 169 |
| H(11B) | 8894  | 8127  | 8352  | 169 |
| H(12A) | 8486  | 7226  | 8995  | 166 |
| H(12B) | 7676  | 7554  | 8483  | 166 |

|        |       |       |       |     |
|--------|-------|-------|-------|-----|
| H(14A) | 7231  | 6590  | 8714  | 120 |
| H(14B) | 8148  | 6110  | 9146  | 120 |
| H(15G) | 7564  | 5493  | 8610  | 128 |
| H(15H) | 7979  | 5910  | 8051  | 128 |
| H(17A) | 9120  | 4867  | 7869  | 123 |
| H(17B) | 8785  | 4412  | 8437  | 123 |
| H(18G) | 10474 | 4107  | 8791  | 140 |
| H(18H) | 10456 | 3836  | 8230  | 140 |
| H(20C) | 9047  | 6646  | 6846  | 297 |
| H(20D) | 9090  | 7305  | 7062  | 297 |
| H(21G) | 9579  | 7038  | 6025  | 316 |
| H(21H) | 9515  | 7726  | 6222  | 316 |
| H(22G) | 11112 | 7480  | 6162  | 381 |
| H(22H) | 11180 | 6775  | 5987  | 381 |
| H(23A) | 11847 | 6230  | 6810  | 248 |
| H(23B) | 11602 | 6936  | 7016  | 248 |
| H(25A) | 10173 | 5748  | 10110 | 241 |
| H(25B) | 10289 | 6385  | 9617  | 241 |
| H(26A) | 11870 | 6263  | 9910  | 223 |
| H(26B) | 11585 | 5803  | 10491 | 223 |
| H(27A) | 13002 | 5362  | 9710  | 210 |
| H(27B) | 12750 | 4908  | 10304 | 210 |
| H(28A) | 12335 | 4756  | 9340  | 226 |
| H(28B) | 11731 | 4539  | 9913  | 226 |
| H(30C) | 7804  | 9486  | 5474  | 172 |
| H(30D) | 8427  | 8828  | 5225  | 172 |
| H(31A) | 7102  | 8337  | 5545  | 175 |
| H(31B) | 7648  | 8456  | 6056  | 175 |
| H(33A) | 6176  | 8464  | 6635  | 163 |
| H(33B) | 5635  | 8321  | 6132  | 163 |
| H(34A) | 4354  | 8908  | 6741  | 164 |
| H(34B) | 4810  | 9545  | 6578  | 164 |
| H(36A) | 3162  | 10217 | 6272  | 180 |
| H(36B) | 2764  | 9555  | 6399  | 180 |
| H(37A) | 8249  | 9648  | 4333  | 196 |
| H(37B) | 7504  | 10259 | 4600  | 196 |
| H(39A) | 3401  | 9100  | 3980  | 191 |
| H(39B) | 3800  | 9757  | 3778  | 191 |
| H(40A) | 4949  | 9245  | 3301  | 228 |
| H(40B) | 4468  | 8615  | 3454  | 228 |
| H(41A) | 6099  | 8762  | 3909  | 222 |
| H(41B) | 5834  | 8073  | 3902  | 222 |
| H(42A) | 4875  | 8113  | 4713  | 225 |
| H(42B) | 5719  | 8456  | 4838  | 225 |
| H(44A) | 10455 | 5339  | 6717  | 102 |
| H(44B) | 10469 | 4649  | 6536  | 102 |
| H(45A) | 8755  | 5358  | 6702  | 94  |
| H(45B) | 8909  | 5935  | 6168  | 94  |
| H(47A) | 7465  | 5786  | 5695  | 89  |
| H(47B) | 7379  | 5232  | 6264  | 89  |
| H(48A) | 7830  | 4369  | 5730  | 88  |
| H(48B) | 6754  | 4952  | 5529  | 88  |
| H(50C) | 6970  | 4708  | 4613  | 100 |
| H(50D) | 8058  | 4125  | 4793  | 100 |
| H(51A) | 7960  | 4626  | 3789  | 105 |
| H(51B) | 7889  | 5348  | 3930  | 105 |

|        |       |      |      |     |
|--------|-------|------|------|-----|
| H(53A) | 10160 | 6993 | 4390 | 219 |
| H(53B) | 10092 | 6636 | 5050 | 219 |
| H(54A) | 8622  | 7389 | 5155 | 247 |
| H(54B) | 8861  | 7839 | 4556 | 247 |
| H(55A) | 7417  | 7285 | 4777 | 381 |
| H(55B) | 7754  | 7645 | 4165 | 381 |
| H(56A) | 7927  | 6382 | 4551 | 233 |
| H(56B) | 8331  | 6735 | 3958 | 233 |

---

**Torsion angles [°] for [LFeN<sub>2</sub>][K(18-crown-6)(THF)<sub>2</sub>]<sub>2</sub> (3).**

|                             |           |
|-----------------------------|-----------|
| Fe(1)-S(11)-C(11)-C(61)     | 172.6(3)  |
| Fe(1)-S(11)-C(11)-C(21)     | -10.5(5)  |
| C(61)-C(11)-C(21)-C(31)     | 1.5(7)    |
| S(11)-C(11)-C(21)-C(31)     | -175.3(4) |
| C(61)-C(11)-C(21)-C(63)     | -178.2(4) |
| S(11)-C(11)-C(21)-C(63)     | 4.9(7)    |
| C(11)-C(21)-C(31)-F(71)     | -178.7(5) |
| C(63)-C(21)-C(31)-F(71)     | 1.0(8)    |
| C(11)-C(21)-C(31)-C(41)     | 0.0(8)    |
| C(63)-C(21)-C(31)-C(41)     | 179.7(5)  |
| C(21)-C(31)-C(41)-C(51)     | -0.6(9)   |
| F(71)-C(31)-C(41)-C(51)     | 178.2(5)  |
| C(31)-C(41)-C(51)-C(61)     | -0.4(8)   |
| C(41)-C(51)-C(61)-C(11)     | 1.8(7)    |
| C(41)-C(51)-C(61)-C(81)     | -177.9(5) |
| C(21)-C(11)-C(61)-C(51)     | -2.4(7)   |
| S(11)-C(11)-C(61)-C(51)     | 174.6(4)  |
| C(21)-C(11)-C(61)-C(81)     | 177.3(4)  |
| S(11)-C(11)-C(61)-C(81)     | -5.7(6)   |
| C(51)-C(61)-C(81)-C(131)    | -81.6(6)  |
| C(11)-C(61)-C(81)-C(131)    | 98.7(6)   |
| C(51)-C(61)-C(81)-C(91)     | 94.8(6)   |
| C(11)-C(61)-C(81)-C(91)     | -84.9(6)  |
| C(131)-C(81)-C(91)-C(101)   | -1.2(8)   |
| C(61)-C(81)-C(91)-C(101)    | -177.6(5) |
| C(131)-C(81)-C(91)-C(141)   | 176.8(5)  |
| C(61)-C(81)-C(91)-C(141)    | 0.4(7)    |
| C(81)-C(91)-C(101)-C(111)   | 2.2(9)    |
| C(141)-C(91)-C(101)-C(111)  | -175.8(5) |
| C(91)-C(101)-C(111)-C(121)  | -2.7(9)   |
| C(91)-C(101)-C(111)-C(171)  | 178.8(6)  |
| C(101)-C(111)-C(121)-C(131) | 2.3(9)    |
| C(171)-C(111)-C(121)-C(131) | -179.3(6) |
| C(91)-C(81)-C(131)-C(121)   | 0.8(7)    |
| C(61)-C(81)-C(131)-C(121)   | 177.2(5)  |
| C(91)-C(81)-C(131)-C(201)   | 178.6(5)  |
| C(61)-C(81)-C(131)-C(201)   | -5.0(7)   |
| C(111)-C(121)-C(131)-C(81)  | -1.4(8)   |
| C(111)-C(121)-C(131)-C(201) | -179.3(5) |
| C(101)-C(91)-C(141)-C(161)  | -50.8(7)  |

|                             |            |
|-----------------------------|------------|
| C(81)-C(91)-C(141)-C(161)   | 131.2(5)   |
| C(101)-C(91)-C(141)-C(151)  | 74.5(7)    |
| C(81)-C(91)-C(141)-C(151)   | -103.5(6)  |
| C(121)-C(111)-C(171)-C(181) | -133.4(8)  |
| C(101)-C(111)-C(171)-C(181) | 45.0(10)   |
| C(121)-C(111)-C(171)-C(191) | 103.3(9)   |
| C(101)-C(111)-C(171)-C(191) | -78.3(10)  |
| C(81)-C(131)-C(201)-C(221)  | -122.7(6)  |
| C(121)-C(131)-C(201)-C(221) | 55.2(8)    |
| C(81)-C(131)-C(201)-C(211)  | 113.8(6)   |
| C(121)-C(131)-C(201)-C(211) | -68.3(7)   |
| Fe(1)-S(21)-C(12)-C(62)     | -176.8(4)  |
| Fe(1)-S(21)-C(12)-C(22)     | 3.7(4)     |
| C(62)-C(12)-C(22)-C(32)     | -2.3(7)    |
| S(21)-C(12)-C(22)-C(32)     | 177.1(4)   |
| C(62)-C(12)-C(22)-C(23)     | 178.0(4)   |
| S(21)-C(12)-C(22)-C(23)     | -2.6(6)    |
| C(12)-C(22)-C(32)-C(42)     | 2.4(8)     |
| C(23)-C(22)-C(32)-C(42)     | -177.9(5)  |
| C(12)-C(22)-C(32)-F(72)     | 178.6(4)   |
| C(23)-C(22)-C(32)-F(72)     | -1.7(7)    |
| F(72)-C(32)-C(42)-C(52)     | -178.0(4)  |
| C(22)-C(32)-C(42)-C(52)     | -1.7(9)    |
| C(32)-C(42)-C(52)-C(62)     | 1.0(8)     |
| C(42)-C(52)-C(62)-C(12)     | -1.1(8)    |
| C(42)-C(52)-C(62)-C(82)     | 178.7(5)   |
| C(22)-C(12)-C(62)-C(52)     | 1.8(7)     |
| S(21)-C(12)-C(62)-C(52)     | -177.6(4)  |
| C(22)-C(12)-C(62)-C(82)     | -178.0(4)  |
| S(21)-C(12)-C(62)-C(82)     | 2.6(6)     |
| C(52)-C(62)-C(82)-C(92)     | -87.0(6)   |
| C(12)-C(62)-C(82)-C(92)     | 92.8(6)    |
| C(52)-C(62)-C(82)-C(132)    | 90.0(6)    |
| C(12)-C(62)-C(82)-C(132)    | -90.2(6)   |
| C(132)-C(82)-C(92)-C(102)   | -1.4(8)    |
| C(62)-C(82)-C(92)-C(102)    | 175.7(5)   |
| C(132)-C(82)-C(92)-C(142)   | 179.3(5)   |
| C(62)-C(82)-C(92)-C(142)    | -3.6(8)    |
| C(82)-C(92)-C(102)-C(112)   | -0.2(9)    |
| C(142)-C(92)-C(102)-C(112)  | 179.1(5)   |
| C(92)-C(102)-C(112)-C(122)  | 2.8(9)     |
| C(92)-C(102)-C(112)-C(172)  | -178.1(6)  |
| C(102)-C(112)-C(122)-C(132) | -4.0(9)    |
| C(172)-C(112)-C(122)-C(132) | 176.9(5)   |
| C(112)-C(122)-C(132)-C(82)  | 2.5(9)     |
| C(112)-C(122)-C(132)-C(202) | -178.5(5)  |
| C(92)-C(82)-C(132)-C(122)   | 0.3(8)     |
| C(62)-C(82)-C(132)-C(122)   | -176.7(5)  |
| C(92)-C(82)-C(132)-C(202)   | -178.7(5)  |
| C(62)-C(82)-C(132)-C(202)   | 4.3(8)     |
| C(102)-C(92)-C(142)-C(162)  | -66.9(7)   |
| C(82)-C(92)-C(142)-C(162)   | 112.4(6)   |
| C(102)-C(92)-C(142)-C(152)  | 58.3(7)    |
| C(82)-C(92)-C(142)-C(152)   | -122.5(6)  |
| C(102)-C(112)-C(172)-C(182) | -119.6(10) |
| C(122)-C(112)-C(172)-C(182) | 59.4(11)   |

|                             |           |
|-----------------------------|-----------|
| C(102)-C(112)-C(172)-C(192) | 106.7(9)  |
| C(122)-C(112)-C(172)-C(192) | -74.2(10) |
| C(122)-C(132)-C(202)-C(222) | 82.2(7)   |
| C(82)-C(132)-C(202)-C(222)  | -98.8(6)  |
| C(122)-C(132)-C(202)-C(212) | -41.2(8)  |
| C(82)-C(132)-C(202)-C(212)  | 137.8(5)  |
| C(63)-C(13)-C(23)-C(33)     | -4.8(7)   |
| Fe(1)-C(13)-C(23)-C(33)     | -102.3(5) |
| C(63)-C(13)-C(23)-C(22)     | -163.4(5) |
| Fe(1)-C(13)-C(23)-C(22)     | 99.0(4)   |
| C(63)-C(13)-C(23)-Fe(1)     | 97.5(5)   |
| C(32)-C(22)-C(23)-C(13)     | 109.9(6)  |
| C(12)-C(22)-C(23)-C(13)     | -70.4(6)  |
| C(32)-C(22)-C(23)-C(33)     | -48.0(7)  |
| C(12)-C(22)-C(23)-C(33)     | 131.8(5)  |
| C(32)-C(22)-C(23)-Fe(1)     | -180.0(4) |
| C(12)-C(22)-C(23)-Fe(1)     | -0.3(6)   |
| C(13)-C(23)-C(33)-C(43)     | 2.2(8)    |
| C(22)-C(23)-C(33)-C(43)     | 161.1(6)  |
| Fe(1)-C(23)-C(33)-C(43)     | -67.2(7)  |
| C(23)-C(33)-C(43)-C(53)     | 0.6(10)   |
| C(33)-C(43)-C(53)-C(63)     | -0.9(10)  |
| C(43)-C(53)-C(63)-C(13)     | -1.7(9)   |
| C(43)-C(53)-C(63)-C(21)     | 176.1(6)  |
| C(23)-C(13)-C(63)-C(53)     | 4.7(8)    |
| Fe(1)-C(13)-C(63)-C(53)     | 88.4(5)   |
| C(23)-C(13)-C(63)-C(21)     | -173.2(5) |
| Fe(1)-C(13)-C(63)-C(21)     | -89.6(5)  |
| C(31)-C(21)-C(63)-C(53)     | 55.2(8)   |
| C(11)-C(21)-C(63)-C(53)     | -125.0(6) |
| C(31)-C(21)-C(63)-C(13)     | -126.9(5) |
| C(11)-C(21)-C(63)-C(13)     | 52.8(7)   |
| C(180)-O(10)-C(20)-C(30)    | -172.4(7) |
| K(1)-O(10)-C(20)-C(30)      | -36.3(9)  |
| C(180)-O(10)-C(20)-K(1)     | -136.2(7) |
| O(10)-C(20)-C(30)-O(40)     | 63.4(10)  |
| K(1)-C(20)-C(30)-O(40)      | 38.5(6)   |
| O(10)-C(20)-C(30)-K(1)      | 25.0(6)   |
| C(20)-C(30)-O(40)-C(50)     | 176.6(7)  |
| K(1)-C(30)-O(40)-C(50)      | -129.9(7) |
| C(20)-C(30)-O(40)-K(1)      | -53.6(9)  |
| C(30)-O(40)-C(50)-C(60)     | 175.7(7)  |
| K(1)-O(40)-C(50)-C(60)      | 48.1(7)   |
| C(30)-O(40)-C(50)-K(1)      | 127.6(7)  |
| O(40)-C(50)-C(60)-O(70)     | -67.5(8)  |
| K(1)-C(50)-C(60)-O(70)      | -34.4(5)  |
| O(40)-C(50)-C(60)-K(1)      | -33.1(5)  |
| C(50)-C(60)-O(70)-C(80)     | -170.2(6) |
| K(1)-C(60)-O(70)-C(80)      | 138.5(8)  |
| C(50)-C(60)-O(70)-K(1)      | 51.3(7)   |
| C(60)-O(70)-C(80)-C(90)     | 175.7(7)  |
| K(1)-O(70)-C(80)-C(90)      | -46.9(9)  |
| C(60)-O(70)-C(80)-K(1)      | -137.4(8) |
| O(70)-C(80)-C(90)-O(100)    | 68.0(10)  |
| K(1)-C(80)-C(90)-O(100)     | 37.2(6)   |
| O(70)-C(80)-C(90)-K(1)      | 30.8(6)   |



|                             |            |
|-----------------------------|------------|
| C(80)-C(90)-O(100)-C(110)   | -178.0(7)  |
| K(1)-C(90)-O(100)-C(110)    | -125.7(8)  |
| C(80)-C(90)-O(100)-K(1)     | -52.3(8)   |
| C(90)-O(100)-C(110)-C(120)  | -179.5(8)  |
| K(1)-O(100)-C(110)-C(120)   | 54.0(9)    |
| C(90)-O(100)-C(110)-K(1)    | 126.5(8)   |
| O(100)-C(110)-C(120)-O(130) | -62.6(11)  |
| K(1)-C(110)-C(120)-O(130)   | -23.6(7)   |
| O(100)-C(110)-C(120)-K(1)   | -39.0(6)   |
| C(110)-C(120)-O(130)-C(140) | -178.6(8)  |
| K(1)-C(120)-O(130)-C(140)   | 143.9(9)   |
| C(110)-C(120)-O(130)-K(1)   | 37.5(11)   |
| C(120)-O(130)-C(140)-C(150) | 165.3(7)   |
| K(1)-O(130)-C(140)-C(150)   | -48.4(7)   |
| C(120)-O(130)-C(140)-K(1)   | -146.2(9)  |
| O(130)-C(140)-C(150)-O(160) | 67.6(8)    |
| K(1)-C(140)-C(150)-O(160)   | 35.7(5)    |
| O(130)-C(140)-C(150)-K(1)   | 32.0(4)    |
| C(140)-C(150)-O(160)-C(170) | -178.4(6)  |
| K(1)-C(150)-O(160)-C(170)   | -127.6(6)  |
| C(140)-C(150)-O(160)-K(1)   | -50.8(7)   |
| C(150)-O(160)-C(170)-C(180) | 175.6(6)   |
| K(1)-O(160)-C(170)-C(180)   | 49.2(7)    |
| C(150)-O(160)-C(170)-K(1)   | 126.4(6)   |
| C(20)-O(10)-C(180)-C(170)   | -175.6(7)  |
| K(1)-O(10)-C(180)-C(170)    | 46.6(7)    |
| C(20)-O(10)-C(180)-K(1)     | 137.8(7)   |
| O(160)-C(170)-C(180)-O(10)  | -65.6(8)   |
| K(1)-C(170)-C(180)-O(10)    | -31.8(5)   |
| O(160)-C(170)-C(180)-K(1)   | -33.7(5)   |
| C(230)-O(190)-C(200)-C(210) | 10.4(15)   |
| K(1)-O(190)-C(200)-C(210)   | 172.2(9)   |
| C(230)-O(190)-C(200)-K(1)   | -161.8(14) |
| O(190)-C(200)-C(210)-C(220) | -5(2)      |
| K(1)-C(200)-C(210)-C(220)   | 2(3)       |
| C(200)-C(210)-C(220)-C(230) | -2(3)      |
| C(200)-O(190)-C(230)-C(220) | -12.1(17)  |
| K(1)-O(190)-C(230)-C(220)   | -174.0(12) |
| C(200)-O(190)-C(230)-K(1)   | 161.9(14)  |
| C(210)-C(220)-C(230)-O(190) | 9(2)       |
| C(210)-C(220)-C(230)-K(1)   | 2(3)       |
| C(280)-O(240)-C(250)-C(260) | 29.4(13)   |
| K(1)-O(240)-C(250)-C(260)   | -120.9(9)  |
| C(280)-O(240)-C(250)-K(1)   | 150.3(12)  |
| O(240)-C(250)-C(260)-C(270) | -16.4(14)  |
| K(1)-C(250)-C(260)-C(270)   | -53.7(13)  |
| C(250)-C(260)-C(270)-C(280) | -2.3(14)   |
| C(250)-O(240)-C(280)-C(270) | -32.3(13)  |
| K(1)-O(240)-C(280)-C(270)   | 118.3(8)   |
| C(250)-O(240)-C(280)-K(1)   | -150.7(12) |
| C(260)-C(270)-C(280)-O(240) | 20.3(13)   |
| C(260)-C(270)-C(280)-K(1)   | 60.1(12)   |
| C(370)-O(290)-C(300)-C(310) | 172.9(8)   |
| K(2)-O(290)-C(300)-C(310)   | 46.0(10)   |
| C(370)-O(290)-C(300)-K(2)   | 127.0(8)   |
| O(290)-C(300)-C(310)-O(320) | -64.1(11)  |

|                               |            |
|-------------------------------|------------|
| K(2)-C(300)-C(310)-O(320)     | -31.8(6)   |
| O(290)-C(300)-C(310)-K(2)     | -32.2(7)   |
| C(300)-C(310)-O(320)-C(330)   | -178.7(8)  |
| K(2)-C(310)-O(320)-C(330)     | 133.8(8)   |
| C(300)-C(310)-O(320)-K(2)     | 47.5(9)    |
| C(310)-O(320)-C(330)-C(340)   | -179.4(8)  |
| K(2)-O(320)-C(330)-C(340)     | -45.3(8)   |
| C(310)-O(320)-C(330)-K(2)     | -134.1(8)  |
| O(320)-C(330)-C(340)-O(350)   | 63.7(9)    |
| K(2)-C(330)-C(340)-O(350)     | 32.8(5)    |
| O(320)-C(330)-C(340)-K(2)     | 30.9(6)    |
| C(330)-C(340)-O(350)-C(360)   | 176.1(7)   |
| K(2)-C(340)-O(350)-C(360)     | -133.5(8)  |
| C(330)-C(340)-O(350)-K(2)     | -50.3(8)   |
| C(340)-O(350)-C(360)-C(370)#1 | 179.0(8)   |
| K(2)-O(350)-C(360)-C(370)#1   | 44.4(10)   |
| C(340)-O(350)-C(360)-K(2)     | 134.5(8)   |
| C(300)-O(290)-C(370)-C(360)#1 | 178.5(8)   |
| K(2)-O(290)-C(370)-C(360)#1   | -53.6(10)  |
| C(300)-O(290)-C(370)-K(2)     | -128.0(8)  |
| O(380)-C(390)-C(400)-C(410)   | 5.6(15)    |
| K(2)-C(390)-C(400)-C(410)     | 41.7(13)   |
| C(390)-C(400)-C(410)-C(420)   | 17.3(15)   |
| C(390)-C(400)-C(410)-K(2)     | -32.2(10)  |
| C(400)-C(410)-C(420)-O(380)   | -32.3(13)  |
| K(2)-C(410)-C(420)-O(380)     | 47.9(5)    |
| C(400)-C(410)-C(420)-K(2)     | -80.2(11)  |
| C(400)-C(390)-O(380)-C(420)   | -26.8(14)  |
| K(2)-C(390)-O(380)-C(420)     | -131.3(13) |
| C(400)-C(390)-O(380)-K(2)     | 104.5(11)  |
| C(410)-C(420)-O(380)-C(390)   | 33.1(11)   |
| K(2)-C(420)-O(380)-C(390)     | 143.1(9)   |
| C(410)-C(420)-O(380)-K(2)     | -110.0(7)  |
| C(510)#2-O(430)-C(440)-C(450) | 176.9(5)   |
| K(3)-O(430)-C(440)-C(450)     | -53.1(5)   |
| C(510)#2-O(430)-C(440)-K(3)   | -130.0(5)  |
| O(430)-C(440)-C(450)-O(460)   | 68.1(6)    |
| K(3)-C(440)-C(450)-O(460)     | 31.4(4)    |
| O(430)-C(440)-C(450)-K(3)     | 36.7(4)    |
| O(460)-C(470)-C(480)-O(490)   | -65.9(6)   |
| K(3)-C(470)-C(480)-O(490)     | -33.9(3)   |
| O(460)-C(470)-C(480)-K(3)     | -32.0(3)   |
| C(470)-C(480)-O(490)-C(500)   | -178.7(5)  |
| K(3)-C(480)-O(490)-C(500)     | 131.9(5)   |
| C(470)-C(480)-O(490)-K(3)     | 49.3(5)    |
| C(480)-O(490)-C(500)-C(510)   | 178.1(5)   |
| K(3)-O(490)-C(500)-C(510)     | -51.0(5)   |
| C(480)-O(490)-C(500)-K(3)     | -130.9(5)  |
| O(490)-C(500)-C(510)-O(430)#2 | 67.0(6)    |
| K(3)-C(500)-C(510)-O(430)#2   | 33.1(4)    |
| O(490)-C(500)-C(510)-K(3)     | 33.9(4)    |
| C(560)-O(520)-C(530)-C(540)   | 16.6(15)   |
| K(3)-O(520)-C(530)-C(540)     | -135.1(9)  |
| C(560)-O(520)-C(530)-K(3)     | 151.7(12)  |
| O(520)-C(530)-C(540)-C(550)   | -14(2)     |
| K(3)-C(530)-C(540)-C(550)     | -47(2)     |

|                             |            |
|-----------------------------|------------|
| C(530)-C(540)-C(550)-C(560) | 7(3)       |
| C(530)-O(520)-C(560)-C(550) | -13(2)     |
| K(3)-O(520)-C(560)-C(550)   | 139.2(15)  |
| C(530)-O(520)-C(560)-K(3)   | -152.4(12) |
| C(540)-C(550)-C(560)-O(520) | 4(3)       |
| C(540)-C(550)-C(560)-K(3)   | 41(3)      |
| C(440)-C(450)-O(460)-C(470) | 176.0(5)   |
| K(3)-C(450)-O(460)-C(470)   | -136.2(5)  |
| C(440)-C(450)-O(460)-K(3)   | -47.8(6)   |
| C(480)-C(470)-O(460)-C(450) | -174.4(5)  |
| K(3)-C(470)-O(460)-C(450)   | 136.1(5)   |
| C(480)-C(470)-O(460)-K(3)   | 49.5(5)    |

---

Symmetry transformations used to generate equivalent atoms:

#1  $-x+1, -y+2, -z+1$  #2  $-x+2, -y+1, -z+1$

## *Experimental and Refinement Details for [LFeSC<sub>6</sub>H<sub>4</sub>Ar]K (5)*

Single crystals for X-ray analysis were obtained by slow evaporation of a solution of [LFeSC<sub>6</sub>H<sub>4</sub>Ar]K (5) (30 mg, crude product after concentration of the reaction mixture) in Et<sub>2</sub>O (0.2 mL) at room temperature. Low-temperature diffraction data ( $\omega$ -scans) were collected on a Rigaku MicroMax-007HF diffractometer coupled to a Saturn994+ CCD detector with Cu K $\alpha$  ( $\lambda = 1.54178 \text{ \AA}$ ). All structures were solved by direct methods and were refined against  $F^2$  on all data by full-matrix least squares<sup>50</sup>. All non-hydrogen atoms were refined anisotropically. Hydrogen atoms were included in the model at geometrically calculated positions and refined using a riding model. The isotropic displacement parameters of all hydrogen atoms were fixed to 1.2 times the U value of the atoms to which they are linked (1.5 times for methyl groups).

The diffraction of the crystal was weak. Long exposure times were used to compensate for this fact. However, numerous OMIT statements were needed to exclude overexposed reflections that were improperly recorded by the CCD detector. There are a number of elongated thermal ellipsoids in the terminal isopropyl groups. Numerous attempts to model these groups as disordered resulted in unstable refinements. This difficulty required the incorporation of some rigid bond restraints to aid in the refinement of the groups {C184, C164, C174, C104}, {C191, C171, C181, C111}, and {C212, C202, C222, C132}. The THF-potassium moiety is disordered over two positions. The site occupancy factors of the two positions were freely refined and converged at the values of 0.65(7) and 0.35(7). The major position involves atoms {K1, O1, C2, C3, C4, C5}; the minor component contains {K2, O100, C200, C300, C400, C500}. Free refinement of the THF-potassium moiety was not possible due to the close proximity of the atoms in the disordered model. Rigid bond restraints were used to aid the refinement of the major site, while the geometries of the minor site were constrained to be the same as the major site. The minor site was also left isotropic due to the small amount of electron density modeled and to aid in convergence.

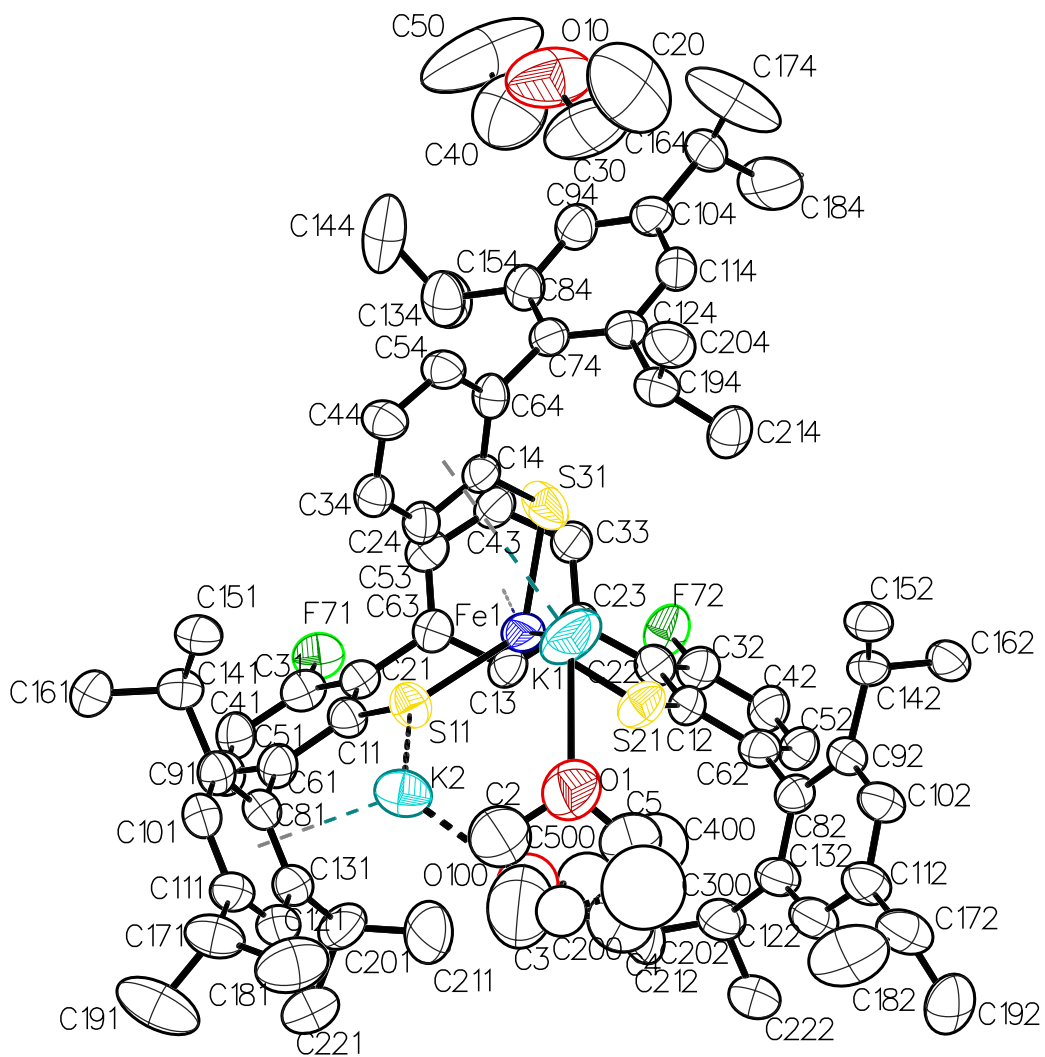

The full numbering scheme of [LFeSC<sub>6</sub>H<sub>4</sub>Ar]K (**5**). All atoms shown are depicted with 50% thermal contours. The hydrogen atoms have been removed for clarity.

## Crystal data and structure refinement for [LFeSC<sub>6</sub>H<sub>4</sub>Ar]K (5).

|                                   |                                                                                 |                |
|-----------------------------------|---------------------------------------------------------------------------------|----------------|
| Identification code               | 007-14192                                                                       |                |
| Empirical formula                 | C <sub>77</sub> H <sub>99</sub> F <sub>2</sub> FeKO <sub>2</sub> S <sub>3</sub> |                |
| Formula weight                    | 1285.69                                                                         |                |
| Temperature                       | 93(2) K                                                                         |                |
| Wavelength                        | 1.54187 Å                                                                       |                |
| Crystal system                    | Monoclinic                                                                      |                |
| Space group                       | P2 <sub>1</sub>                                                                 |                |
| Unit cell dimensions              | a = 9.1551(2) Å                                                                 | a = 90°        |
|                                   | b = 22.2274(4) Å                                                                | b = 91.735(7)° |
|                                   | c = 17.4467(12) Å                                                               | g = 90°        |
| Volume                            | 3548.7(3) Å <sup>3</sup>                                                        |                |
| Z                                 | 2                                                                               |                |
| Density (calculated)              | 1.203 g/cm <sup>3</sup>                                                         |                |
| Absorption coefficient            | 3.432 mm <sup>-1</sup>                                                          |                |
| F(000)                            | 1376                                                                            |                |
| Crystal size                      | 0.150 x 0.150 x 0.080 mm <sup>3</sup>                                           |                |
| Crystal color and habit           | Orange block                                                                    |                |
| Θ range for data collection       | 2.534 to 65.087°.                                                               |                |
| Index ranges                      | -10 ≤ h ≤ 10, -26 ≤ k ≤ 26, -20 ≤ l ≤ 20                                        |                |
| Reflections collected             | 124330                                                                          |                |
| Independent reflections           | 11975 [R(int) = 0.2102]                                                         |                |
| Completeness to θ = 65.087°       | 99.6 %                                                                          |                |
| Absorption correction             | Semi-empirical from equivalents                                                 |                |
| Max. and min. transmission        | 0.771 and 0.655                                                                 |                |
| Refinement method                 | Full-matrix least-squares on F <sup>2</sup>                                     |                |
| Data / restraints / parameters    | 11975 / 95 / 825                                                                |                |
| Goodness-of-fit on F <sup>2</sup> | 0.973                                                                           |                |
| Final R indices [I > 2σ(I)]       | R1 = 0.0706, wR2 = 0.1620                                                       |                |
| R indices (all data)              | R1 = 0.1132, wR2 = 0.1894                                                       |                |
| Absolute structure parameter      | 0.095(5)                                                                        |                |
| Largest diff. peak and hole       | 1.161 and -0.533 e.Å <sup>-3</sup>                                              |                |

**Table 2. Atomic coordinates (  $\times 10^4$ ) and equivalent isotropic displacement parameters ( $\text{\AA}^2 \times 10^3$ ) for [LFeSC<sub>6</sub>H<sub>4</sub>Ar]K (5). U(eq) is defined as one third of the trace of the orthogonalized U<sup>ij</sup> tensor.**

|        | x        | y       | z       | U(eq) |
|--------|----------|---------|---------|-------|
| Fe(1)  | 5148(2)  | 5033(1) | 4400(1) | 70(1) |
| S(11)  | 5427(3)  | 4186(1) | 3673(1) | 54(1) |
| S(21)  | 5388(3)  | 5933(1) | 3742(2) | 61(1) |
| S(31)  | 5956(3)  | 5129(1) | 5636(1) | 76(1) |
| F(72)  | 18(6)    | 6351(2) | 4362(3) | 64(2) |
| F(71)  | -15(6)   | 3726(2) | 4020(3) | 62(1) |
| C(24)  | 7713(9)  | 4120(3) | 5458(5) | 47(2) |
| C(61)  | 3867(10) | 3266(4) | 3025(5) | 50(2) |
| C(81)  | 5218(10) | 3098(4) | 2625(5) | 49(2) |
| C(53)  | 1923(10) | 4436(4) | 5093(5) | 51(2) |
| C(194) | 9246(10) | 5798(4) | 6859(5) | 50(2) |
| C(34)  | 8750(9)  | 3707(4) | 5724(5) | 48(2) |
| C(41)  | 1318(11) | 3059(4) | 3259(5) | 58(2) |
| C(22)  | 2482(10) | 6160(4) | 4073(5) | 47(2) |
| C(32)  | 1294(10) | 6543(4) | 4037(5) | 53(2) |
| C(142) | 6005(10) | 7613(4) | 4171(4) | 45(2) |
| C(91)  | 6203(9)  | 2698(4) | 2981(5) | 46(2) |
| C(141) | 5934(10) | 2422(4) | 3767(5) | 52(2) |
| C(111) | 7777(11) | 2773(4) | 1878(5) | 55(2) |
| C(84)  | 6085(9)  | 4918(3) | 7711(5) | 51(2) |
| C(92)  | 6149(9)  | 7467(3) | 3328(5) | 43(2) |
| C(51)  | 2602(10) | 2921(4) | 2917(5) | 53(2) |
| C(74)  | 7279(8)  | 5062(4) | 7265(4) | 45(2) |
| C(42)  | 1258(11) | 7085(4) | 3670(5) | 56(2) |
| C(43)  | 1765(9)  | 4942(4) | 5527(5) | 52(2) |
| C(124) | 8019(10) | 5608(4) | 7372(5) | 47(2) |
| C(104) | 6476(10) | 5847(4) | 8439(5) | 51(2) |
| C(101) | 7439(10) | 2543(4) | 2589(5) | 51(2) |
| C(214) | 8913(13) | 6375(4) | 6441(6) | 71(3) |
| C(114) | 7598(10) | 5992(4) | 7960(5) | 53(2) |
| C(94)  | 5715(10) | 5310(4) | 8300(5) | 56(2) |
| C(52)  | 2514(10) | 7267(4) | 3323(5) | 47(2) |
| C(63)  | 2322(9)  | 4478(4) | 4336(5) | 46(2) |
| C(64)  | 7815(9)  | 4609(3) | 6696(5) | 44(2) |
| C(31)  | 1270(10) | 3563(4) | 3708(5) | 51(2) |
| C(132) | 5210(10) | 7012(4) | 2135(5) | 53(2) |
| C(14)  | 7211(9)  | 4584(3) | 5940(5) | 44(2) |
| C(12)  | 3785(10) | 6352(4) | 3722(5) | 47(2) |
| C(171) | 9150(12) | 2591(5) | 1470(6) | 76(3) |
| C(164) | 6011(11) | 6261(4) | 9078(5) | 56(2) |
| C(121) | 6775(11) | 3177(4) | 1549(5) | 60(3) |
| C(44)  | 9346(10) | 3745(4) | 6458(5) | 53(2) |
| C(152) | 7439(11) | 7537(4) | 4640(5) | 57(2) |
| C(13)  | 2516(8)  | 5046(4) | 4010(4) | 47(2) |
| C(23)  | 2327(11) | 5572(4) | 4448(5) | 51(2) |
| C(62)  | 3736(10) | 6913(4) | 3334(5) | 47(2) |
| C(54)  | 8828(10) | 4199(4) | 6950(5) | 50(2) |
| C(102) | 7301(10) | 7685(4) | 2919(5) | 55(2) |

|        |           |          |          |         |
|--------|-----------|----------|----------|---------|
| C(222) | 3567(11)  | 6942(4)  | 951(5)   | 65(3)   |
| C(82)  | 5075(9)   | 7128(4)  | 2930(5)  | 44(2)   |
| C(21)  | 2482(10)  | 3934(4)  | 3852(5)  | 47(2)   |
| C(161) | 5484(12)  | 1769(4)  | 3689(6)  | 65(3)   |
| C(162) | 5388(11)  | 8242(4)  | 4259(5)  | 56(2)   |
| C(11)  | 3805(10)  | 3787(4)  | 3505(5)  | 47(2)   |
| C(122) | 6407(12)  | 7239(4)  | 1773(5)  | 64(3)   |
| C(112) | 7473(11)  | 7581(5)  | 2139(6)  | 63(3)   |
| C(202) | 4071(12)  | 6648(5)  | 1691(5)  | 71(3)   |
| C(201) | 4432(13)  | 3768(4)  | 1516(6)  | 74(3)   |
| C(204) | 10676(12) | 5817(5)  | 7292(6)  | 71(3)   |
| C(134) | 5216(11)  | 4346(4)  | 7565(7)  | 69(3)   |
| C(33)  | 1987(10)  | 5521(4)  | 5219(5)  | 51(2)   |
| C(131) | 5497(11)  | 3336(4)  | 1913(5)  | 54(2)   |
| C(154) | 3600(12)  | 4451(5)  | 7529(7)  | 80(3)   |
| C(151) | 7260(12)  | 2484(4)  | 4313(5)  | 64(3)   |
| C(192) | 8245(14)  | 8205(5)  | 1024(8)  | 92(4)   |
| C(172) | 8749(13)  | 7823(6)  | 1711(6)  | 80(4)   |
| C(221) | 4003(13)  | 3566(5)  | 700(6)   | 79(3)   |
| C(144) | 5593(15)  | 3866(5)  | 8177(10) | 110(5)  |
| C(182) | 9799(15)  | 7357(8)  | 1487(9)  | 124(6)  |
| C(191) | 8759(17)  | 2196(8)  | 783(8)   | 131(5)  |
| C(181) | 10043(16) | 3140(7)  | 1233(8)  | 113(4)  |
| C(212) | 4606(19)  | 6028(5)  | 1543(8)  | 120(5)  |
| C(211) | 5020(20)  | 4396(5)  | 1500(9)  | 132(6)  |
| C(174) | 7260(20)  | 6399(11) | 9594(10) | 173(8)  |
| O(10)  | 9946(15)  | 4882(7)  | 9797(6)  | 159(5)  |
| C(30)  | 10930(20) | 5131(11) | 9336(10) | 156(7)  |
| C(20)  | 12130(20) | 5383(11) | 9764(15) | 198(11) |
| C(40)  | 8840(20)  | 4639(10) | 9443(13) | 153(7)  |
| C(50)  | 7640(30)  | 4471(16) | 9950(14) | 280(20) |
| K(1)   | 8778(5)   | 5228(2)  | 4433(3)  | 108(2)  |
| K(2)   | 8199(7)   | 4024(3)  | 2876(4)  | 72(3)   |
| C(184) | 5210(20)  | 6789(7)  | 8768(8)  | 163(8)  |
| O(1)   | 9139(16)  | 5250(6)  | 2973(8)  | 108(4)  |
| C(2)   | 9280(30)  | 4715(11) | 2512(15) | 134(9)  |
| C(3)   | 10170(70) | 4848(15) | 1860(30) | 260(20) |
| C(4)   | 9610(90)  | 5635(15) | 1750(20) | 280(30) |
| C(5)   | 9180(50)  | 5710(13) | 2508(15) | 146(13) |
| O(100) | 9040(30)  | 4946(12) | 2060(18) | 108(9)  |
| C(200) | 10450(30) | 5143(15) | 1840(20) | 74(9)   |
| C(300) | 10710(60) | 5750(30) | 2090(50) | 200(30) |
| C(400) | 8890(50)  | 5920(20) | 2470(30) | 115(19) |
| C(500) | 8220(40)  | 5436(16) | 2070(30) | 105(12) |

**Bond lengths [Å] and angles [°] for [LFeSC<sub>6</sub>H<sub>4</sub>Ar]K (5).**

|             |          |
|-------------|----------|
| Fe(1)-S(31) | 2.269(3) |
| Fe(1)-S(11) | 2.288(3) |
| Fe(1)-S(21) | 2.319(3) |
| Fe(1)-C(13) | 2.484(8) |



|               |           |
|---------------|-----------|
| Fe(1)-K(1)    | 3.350(5)  |
| S(11)-C(11)   | 1.747(10) |
| S(11)-K(2)    | 2.953(7)  |
| S(21)-C(12)   | 1.737(9)  |
| S(21)-K(1)    | 3.649(6)  |
| S(31)-C(14)   | 1.741(8)  |
| S(31)-K(1)    | 3.384(5)  |
| F(72)-C(32)   | 1.381(10) |
| F(72)-K(1)#1  | 2.747(7)  |
| F(71)-C(31)   | 1.359(10) |
| F(71)-K(2)#1  | 2.628(8)  |
| C(24)-C(34)   | 1.390(11) |
| C(24)-C(14)   | 1.416(11) |
| C(24)-K(1)    | 3.212(9)  |
| C(24)-H(24)   | 0.9500    |
| C(61)-C(51)   | 1.396(12) |
| C(61)-C(11)   | 1.431(12) |
| C(61)-C(81)   | 1.486(13) |
| C(81)-C(131)  | 1.382(12) |
| C(81)-C(91)   | 1.399(12) |
| C(81)-K(2)    | 3.436(11) |
| C(53)-C(43)   | 1.367(12) |
| C(53)-C(63)   | 1.384(12) |
| C(53)-K(1)#1  | 3.538(10) |
| C(53)-H(53)   | 0.9500    |
| C(194)-C(204) | 1.492(14) |
| C(194)-C(214) | 1.503(13) |
| C(194)-C(124) | 1.518(12) |
| C(194)-H(194) | 1.0000    |
| C(34)-C(44)   | 1.381(12) |
| C(34)-H(34)   | 0.9500    |
| C(41)-C(51)   | 1.369(13) |
| C(41)-C(31)   | 1.370(13) |
| C(41)-H(41)   | 0.9500    |
| C(22)-C(32)   | 1.382(12) |
| C(22)-C(12)   | 1.424(12) |
| C(22)-C(23)   | 1.469(12) |
| C(32)-C(42)   | 1.364(12) |
| C(142)-C(92)  | 1.515(11) |
| C(142)-C(162) | 1.518(11) |
| C(142)-C(152) | 1.535(12) |
| C(142)-H(142) | 1.0000    |
| C(91)-C(101)  | 1.382(12) |
| C(91)-C(141)  | 1.529(12) |
| C(91)-K(2)    | 3.476(11) |
| C(141)-C(161) | 1.513(12) |
| C(141)-C(151) | 1.527(13) |
| C(141)-H(141) | 1.0000    |
| C(111)-C(101) | 1.385(12) |
| C(111)-C(121) | 1.394(13) |
| C(111)-C(171) | 1.518(14) |
| C(111)-K(2)   | 3.298(11) |
| C(84)-C(94)   | 1.397(11) |
| C(84)-C(74)   | 1.398(11) |
| C(84)-C(134)  | 1.517(13) |
| C(92)-C(102)  | 1.379(12) |

|               |           |
|---------------|-----------|
| C(92)-C(82)   | 1.405(11) |
| C(51)-H(51)   | 0.9500    |
| C(74)-C(124)  | 1.399(12) |
| C(74)-C(64)   | 1.506(11) |
| C(42)-C(52)   | 1.376(12) |
| C(42)-H(42)   | 0.9500    |
| C(43)-C(33)   | 1.412(12) |
| C(43)-K(1)#1  | 3.349(10) |
| C(43)-H(43)   | 0.9500    |
| C(124)-C(114) | 1.398(11) |
| C(104)-C(114) | 1.382(12) |
| C(104)-C(94)  | 1.398(12) |
| C(104)-C(164) | 1.518(12) |
| C(101)-K(2)   | 3.398(11) |
| C(101)-H(101) | 0.9500    |
| C(214)-H(21A) | 0.9800    |
| C(214)-H(21B) | 0.9800    |
| C(214)-H(21C) | 0.9800    |
| C(114)-H(114) | 0.9500    |
| C(94)-H(94)   | 0.9500    |
| C(52)-C(62)   | 1.367(12) |
| C(52)-H(52)   | 0.9500    |
| C(63)-C(13)   | 1.399(12) |
| C(63)-C(21)   | 1.484(12) |
| C(64)-C(54)   | 1.366(11) |
| C(64)-C(14)   | 1.416(11) |
| C(31)-C(21)   | 1.399(12) |
| C(31)-K(2)#1  | 3.288(11) |
| C(132)-C(122) | 1.377(13) |
| C(132)-C(82)  | 1.421(11) |
| C(132)-C(202) | 1.514(13) |
| C(14)-K(1)    | 3.353(9)  |
| C(12)-C(62)   | 1.418(11) |
| C(171)-C(191) | 1.521(17) |
| C(171)-C(181) | 1.532(17) |
| C(171)-H(171) | 1.0000    |
| C(164)-C(174) | 1.466(18) |
| C(164)-C(184) | 1.477(16) |
| C(164)-H(164) | 1.0000    |
| C(121)-C(131) | 1.394(13) |
| C(121)-K(2)   | 3.228(11) |
| C(121)-H(121) | 0.9500    |
| C(44)-C(54)   | 1.415(12) |
| C(44)-H(44)   | 0.9500    |
| C(152)-H(15A) | 0.9800    |
| C(152)-H(15B) | 0.9800    |
| C(152)-H(15C) | 0.9800    |
| C(13)-C(23)   | 1.410(12) |
| C(13)-H(13)   | 0.9500    |
| C(23)-C(33)   | 1.394(12) |
| C(23)-K(1)#1  | 3.337(11) |
| C(62)-C(82)   | 1.510(12) |
| C(54)-H(54)   | 0.9500    |
| C(102)-C(112) | 1.393(12) |
| C(102)-H(102) | 0.9500    |
| C(222)-C(202) | 1.506(13) |

|               |           |
|---------------|-----------|
| C(222)-H(22A) | 0.9800    |
| C(222)-H(22B) | 0.9800    |
| C(222)-H(22C) | 0.9800    |
| C(21)-C(11)   | 1.408(12) |
| C(161)-H(16A) | 0.9800    |
| C(161)-H(16B) | 0.9800    |
| C(161)-H(16C) | 0.9800    |
| C(162)-H(16D) | 0.9800    |
| C(162)-H(16E) | 0.9800    |
| C(162)-H(16F) | 0.9800    |
| C(122)-C(112) | 1.378(13) |
| C(122)-H(122) | 0.9500    |
| C(112)-C(172) | 1.504(14) |
| C(202)-C(212) | 1.489(16) |
| C(202)-H(202) | 1.0000    |
| C(201)-C(211) | 1.497(17) |
| C(201)-C(131) | 1.519(13) |
| C(201)-C(221) | 1.533(15) |
| C(201)-H(201) | 1.0000    |
| C(204)-H(20A) | 0.9800    |
| C(204)-H(20B) | 0.9800    |
| C(204)-H(20C) | 0.9800    |
| C(134)-C(154) | 1.497(14) |
| C(134)-C(144) | 1.542(17) |
| C(134)-H(134) | 1.0000    |
| C(33)-K(1)#1  | 3.270(11) |
| C(33)-H(33)   | 0.9500    |
| C(131)-K(2)   | 3.320(12) |
| C(154)-H(15D) | 0.9800    |
| C(154)-H(15E) | 0.9800    |
| C(154)-H(15F) | 0.9800    |
| C(151)-H(15G) | 0.9800    |
| C(151)-H(15H) | 0.9800    |
| C(151)-H(15I) | 0.9800    |
| C(192)-C(172) | 1.528(17) |
| C(192)-H(19A) | 0.9800    |
| C(192)-H(19B) | 0.9800    |
| C(192)-H(19C) | 0.9800    |
| C(172)-C(182) | 1.473(17) |
| C(172)-H(172) | 1.0000    |
| C(221)-H(22D) | 0.9800    |
| C(221)-H(22E) | 0.9800    |
| C(221)-H(22F) | 0.9800    |
| C(144)-H(14A) | 0.9800    |
| C(144)-H(14B) | 0.9800    |
| C(144)-H(14C) | 0.9800    |
| C(182)-H(18A) | 0.9800    |
| C(182)-H(18B) | 0.9800    |
| C(182)-H(18C) | 0.9800    |
| C(191)-H(19D) | 0.9800    |
| C(191)-H(19E) | 0.9800    |
| C(191)-H(19F) | 0.9800    |
| C(181)-H(18D) | 0.9800    |
| C(181)-H(18E) | 0.9800    |
| C(181)-H(18F) | 0.9800    |
| C(212)-H(21D) | 0.9800    |

|               |           |
|---------------|-----------|
| C(212)-H(21E) | 0.9800    |
| C(212)-H(21F) | 0.9800    |
| C(211)-H(21G) | 0.9800    |
| C(211)-H(21H) | 0.9800    |
| C(211)-H(21I) | 0.9800    |
| C(174)-H(17A) | 0.9800    |
| C(174)-H(17B) | 0.9800    |
| C(174)-H(17C) | 0.9800    |
| O(10)-C(40)   | 1.29(2)   |
| O(10)-C(30)   | 1.347(19) |
| C(30)-C(20)   | 1.42(3)   |
| C(30)-H(30C)  | 0.9900    |
| C(30)-H(30D)  | 0.9900    |
| C(20)-H(20F)  | 0.9800    |
| C(20)-H(20G)  | 0.9800    |
| C(20)-H(20H)  | 0.9800    |
| C(40)-C(50)   | 1.48(3)   |
| C(40)-H(40C)  | 0.9900    |
| C(40)-H(40D)  | 0.9900    |
| C(50)-H(50C)  | 0.9800    |
| C(50)-H(50D)  | 0.9800    |
| C(50)-H(50E)  | 0.9800    |
| K(1)-O(1)     | 2.579(15) |
| K(1)-F(72)#2  | 2.747(7)  |
| K(1)-C(33)#2  | 3.270(11) |
| K(1)-C(23)#2  | 3.337(11) |
| K(1)-C(43)#2  | 3.349(10) |
| K(1)-C(53)#2  | 3.538(10) |
| K(2)-O(100)   | 2.62(3)   |
| K(2)-F(71)#2  | 2.628(8)  |
| K(2)-C(31)#2  | 3.288(11) |
| K(2)-C(500)   | 3.44(4)   |
| C(184)-H(18G) | 0.9800    |
| C(184)-H(18H) | 0.9800    |
| C(184)-H(18I) | 0.9800    |
| O(1)-C(5)     | 1.31(3)   |
| O(1)-C(2)     | 1.45(2)   |
| C(2)-C(3)     | 1.45(4)   |
| C(2)-H(2A)    | 0.9900    |
| C(2)-H(2B)    | 0.9900    |
| C(3)-C(4)     | 1.83(5)   |
| C(3)-H(3A)    | 0.9900    |
| C(3)-H(3B)    | 0.9900    |
| C(4)-C(5)     | 1.40(4)   |
| C(4)-H(4A)    | 0.9900    |
| C(4)-H(4B)    | 0.9900    |
| C(5)-H(5A)    | 0.9900    |
| C(5)-H(5B)    | 0.9900    |
| O(100)-C(500) | 1.32(3)   |
| O(100)-C(200) | 1.42(3)   |
| C(200)-C(300) | 1.44(4)   |
| C(200)-H(20D) | 0.9900    |
| C(200)-H(20E) | 0.9900    |
| C(300)-C(400) | 1.85(6)   |
| C(300)-H(30A) | 0.9900    |
| C(300)-H(30B) | 0.9900    |

|                      |            |
|----------------------|------------|
| C(400)-C(500)        | 1.41(4)    |
| C(400)-H(40A)        | 0.9900     |
| C(400)-H(40B)        | 0.9900     |
| C(500)-H(50A)        | 0.9900     |
| C(500)-H(50B)        | 0.9900     |
| S(31)-Fe(1)-S(11)    | 124.40(10) |
| S(31)-Fe(1)-S(21)    | 110.87(12) |
| S(11)-Fe(1)-S(21)    | 114.97(10) |
| S(31)-Fe(1)-C(13)    | 123.0(2)   |
| S(11)-Fe(1)-C(13)    | 89.0(2)    |
| S(21)-Fe(1)-C(13)    | 87.7(2)    |
| S(31)-Fe(1)-K(1)     | 71.13(12)  |
| S(11)-Fe(1)-K(1)     | 89.36(11)  |
| S(21)-Fe(1)-K(1)     | 77.80(11)  |
| C(13)-Fe(1)-K(1)     | 163.1(2)   |
| C(11)-S(11)-Fe(1)    | 113.7(3)   |
| C(11)-S(11)-K(2)     | 126.7(3)   |
| Fe(1)-S(11)-K(2)     | 118.24(17) |
| C(12)-S(21)-Fe(1)    | 112.4(3)   |
| C(12)-S(21)-K(1)     | 161.2(3)   |
| Fe(1)-S(21)-K(1)     | 63.81(9)   |
| C(14)-S(31)-Fe(1)    | 114.7(3)   |
| C(14)-S(31)-K(1)     | 74.0(3)    |
| Fe(1)-S(31)-K(1)     | 69.50(12)  |
| C(32)-F(72)-K(1)#1   | 130.9(5)   |
| C(31)-F(71)-K(2)#1   | 106.8(5)   |
| C(34)-C(24)-C(14)    | 120.9(8)   |
| C(34)-C(24)-K(1)     | 118.4(5)   |
| C(14)-C(24)-K(1)     | 83.2(4)    |
| C(34)-C(24)-H(24)    | 119.5      |
| C(14)-C(24)-H(24)    | 119.5      |
| K(1)-C(24)-H(24)     | 68.8       |
| C(51)-C(61)-C(11)    | 118.4(8)   |
| C(51)-C(61)-C(81)    | 119.8(8)   |
| C(11)-C(61)-C(81)    | 121.8(8)   |
| C(131)-C(81)-C(91)   | 120.5(8)   |
| C(131)-C(81)-C(61)   | 120.3(8)   |
| C(91)-C(81)-C(61)    | 119.1(8)   |
| C(131)-C(81)-K(2)    | 73.5(6)    |
| C(91)-C(81)-K(2)     | 79.9(5)    |
| C(61)-C(81)-K(2)     | 117.3(5)   |
| C(43)-C(53)-C(63)    | 120.6(8)   |
| C(43)-C(53)-K(1)#1   | 70.9(5)    |
| C(63)-C(53)-K(1)#1   | 83.8(5)    |
| C(43)-C(53)-H(53)    | 119.7      |
| C(63)-C(53)-H(53)    | 119.7      |
| K(1)#1-C(53)-H(53)   | 116.1      |
| C(204)-C(194)-C(214) | 112.5(9)   |
| C(204)-C(194)-C(124) | 111.3(7)   |
| C(214)-C(194)-C(124) | 112.4(7)   |
| C(204)-C(194)-H(194) | 106.7      |
| C(214)-C(194)-H(194) | 106.7      |
| C(124)-C(194)-H(194) | 106.7      |
| C(44)-C(34)-C(24)    | 121.1(8)   |
| C(44)-C(34)-H(34)    | 119.5      |

|                      |          |
|----------------------|----------|
| C(24)-C(34)-H(34)    | 119.5    |
| C(51)-C(41)-C(31)    | 118.4(9) |
| C(51)-C(41)-H(41)    | 120.8    |
| C(31)-C(41)-H(41)    | 120.8    |
| C(32)-C(22)-C(12)    | 117.7(8) |
| C(32)-C(22)-C(23)    | 118.8(8) |
| C(12)-C(22)-C(23)    | 123.5(8) |
| C(42)-C(32)-F(72)    | 117.2(8) |
| C(42)-C(32)-C(22)    | 125.0(9) |
| F(72)-C(32)-C(22)    | 117.8(7) |
| C(92)-C(142)-C(162)  | 109.8(7) |
| C(92)-C(142)-C(152)  | 113.3(7) |
| C(162)-C(142)-C(152) | 111.2(7) |
| C(92)-C(142)-H(142)  | 107.4    |
| C(162)-C(142)-H(142) | 107.4    |
| C(152)-C(142)-H(142) | 107.4    |
| C(101)-C(91)-C(81)   | 117.7(8) |
| C(101)-C(91)-C(141)  | 120.0(8) |
| C(81)-C(91)-C(141)   | 122.2(8) |
| C(101)-C(91)-K(2)    | 75.2(5)  |
| C(81)-C(91)-K(2)     | 76.7(5)  |
| C(141)-C(91)-K(2)    | 119.1(5) |
| C(161)-C(141)-C(151) | 110.6(8) |
| C(161)-C(141)-C(91)  | 110.8(7) |
| C(151)-C(141)-C(91)  | 112.1(8) |
| C(161)-C(141)-H(141) | 107.7    |
| C(151)-C(141)-H(141) | 107.7    |
| C(91)-C(141)-H(141)  | 107.7    |
| C(101)-C(111)-C(121) | 116.3(9) |
| C(101)-C(111)-C(171) | 122.1(9) |
| C(121)-C(111)-C(171) | 121.5(9) |
| C(101)-C(111)-K(2)   | 82.2(5)  |
| C(121)-C(111)-K(2)   | 74.9(5)  |
| C(171)-C(111)-K(2)   | 112.7(6) |
| C(94)-C(84)-C(74)    | 118.5(8) |
| C(94)-C(84)-C(134)   | 120.6(8) |
| C(74)-C(84)-C(134)   | 120.8(8) |
| C(102)-C(92)-C(82)   | 117.8(7) |
| C(102)-C(92)-C(142)  | 121.2(8) |
| C(82)-C(92)-C(142)   | 120.9(7) |
| C(41)-C(51)-C(61)    | 122.6(8) |
| C(41)-C(51)-H(51)    | 118.7    |
| C(61)-C(51)-H(51)    | 118.7    |
| C(84)-C(74)-C(124)   | 120.5(7) |
| C(84)-C(74)-C(64)    | 119.3(8) |
| C(124)-C(74)-C(64)   | 120.1(7) |
| C(32)-C(42)-C(52)    | 117.2(8) |
| C(32)-C(42)-H(42)    | 121.4    |
| C(52)-C(42)-H(42)    | 121.4    |
| C(53)-C(43)-C(33)    | 121.3(8) |
| C(53)-C(43)-K(1)#1   | 86.5(6)  |
| C(33)-C(43)-K(1)#1   | 74.6(5)  |
| C(53)-C(43)-H(43)    | 119.3    |
| C(33)-C(43)-H(43)    | 119.3    |
| K(1)#1-C(43)-H(43)   | 109.5    |
| C(114)-C(124)-C(74)  | 119.0(7) |

|                      |           |
|----------------------|-----------|
| C(114)-C(124)-C(194) | 119.2(8)  |
| C(74)-C(124)-C(194)  | 121.8(7)  |
| C(114)-C(104)-C(94)  | 118.1(8)  |
| C(114)-C(104)-C(164) | 122.2(8)  |
| C(94)-C(104)-C(164)  | 119.7(8)  |
| C(91)-C(101)-C(111)  | 124.0(9)  |
| C(91)-C(101)-K(2)    | 81.6(5)   |
| C(111)-C(101)-K(2)   | 74.0(5)   |
| C(91)-C(101)-H(101)  | 118.0     |
| C(111)-C(101)-H(101) | 118.0     |
| K(2)-C(101)-H(101)   | 116.7     |
| C(194)-C(214)-H(21A) | 109.5     |
| C(194)-C(214)-H(21B) | 109.5     |
| H(21A)-C(214)-H(21B) | 109.5     |
| C(194)-C(214)-H(21C) | 109.5     |
| H(21A)-C(214)-H(21C) | 109.5     |
| H(21B)-C(214)-H(21C) | 109.5     |
| C(104)-C(114)-C(124) | 121.8(8)  |
| C(104)-C(114)-H(114) | 119.1     |
| C(124)-C(114)-H(114) | 119.1     |
| C(84)-C(94)-C(104)   | 121.9(8)  |
| C(84)-C(94)-H(94)    | 119.0     |
| C(104)-C(94)-H(94)   | 119.0     |
| C(62)-C(52)-C(42)    | 121.3(8)  |
| C(62)-C(52)-H(52)    | 119.4     |
| C(42)-C(52)-H(52)    | 119.4     |
| C(53)-C(63)-C(13)    | 119.3(8)  |
| C(53)-C(63)-C(21)    | 121.4(7)  |
| C(13)-C(63)-C(21)    | 119.3(7)  |
| C(54)-C(64)-C(14)    | 121.3(7)  |
| C(54)-C(64)-C(74)    | 117.6(7)  |
| C(14)-C(64)-C(74)    | 120.9(7)  |
| F(71)-C(31)-C(41)    | 119.3(8)  |
| F(71)-C(31)-C(21)    | 117.6(8)  |
| C(41)-C(31)-C(21)    | 123.1(9)  |
| F(71)-C(31)-K(2)#1   | 49.9(4)   |
| C(41)-C(31)-K(2)#1   | 92.5(6)   |
| C(21)-C(31)-K(2)#1   | 124.0(6)  |
| C(122)-C(132)-C(82)  | 118.4(8)  |
| C(122)-C(132)-C(202) | 120.5(8)  |
| C(82)-C(132)-C(202)  | 121.1(8)  |
| C(24)-C(14)-C(64)    | 117.2(7)  |
| C(24)-C(14)-S(31)    | 123.3(6)  |
| C(64)-C(14)-S(31)    | 119.5(6)  |
| C(24)-C(14)-K(1)     | 72.0(4)   |
| C(64)-C(14)-K(1)     | 123.3(5)  |
| S(31)-C(14)-K(1)     | 76.0(3)   |
| C(62)-C(12)-C(22)    | 117.0(8)  |
| C(62)-C(12)-S(21)    | 119.8(7)  |
| C(22)-C(12)-S(21)    | 123.2(6)  |
| C(111)-C(171)-C(191) | 110.2(10) |
| C(111)-C(171)-C(181) | 111.8(10) |
| C(191)-C(171)-C(181) | 111.2(11) |
| C(111)-C(171)-H(171) | 107.9     |
| C(191)-C(171)-H(171) | 107.9     |
| C(181)-C(171)-H(171) | 107.9     |

|                      |           |
|----------------------|-----------|
| C(174)-C(164)-C(184) | 115.3(14) |
| C(174)-C(164)-C(104) | 110.3(9)  |
| C(184)-C(164)-C(104) | 111.1(8)  |
| C(174)-C(164)-H(164) | 106.5     |
| C(184)-C(164)-H(164) | 106.5     |
| C(104)-C(164)-H(164) | 106.5     |
| C(131)-C(121)-C(111) | 121.8(9)  |
| C(131)-C(121)-K(2)   | 81.5(5)   |
| C(111)-C(121)-K(2)   | 80.5(5)   |
| C(131)-C(121)-H(121) | 119.1     |
| C(111)-C(121)-H(121) | 119.1     |
| K(2)-C(121)-H(121)   | 108.8     |
| C(34)-C(44)-C(54)    | 118.5(8)  |
| C(34)-C(44)-H(44)    | 120.8     |
| C(54)-C(44)-H(44)    | 120.8     |
| C(142)-C(152)-H(15A) | 109.5     |
| C(142)-C(152)-H(15B) | 109.5     |
| H(15A)-C(152)-H(15B) | 109.5     |
| C(142)-C(152)-H(15C) | 109.5     |
| H(15A)-C(152)-H(15C) | 109.5     |
| H(15B)-C(152)-H(15C) | 109.5     |
| C(63)-C(13)-C(23)    | 120.7(7)  |
| C(63)-C(13)-Fe(1)    | 90.7(5)   |
| C(23)-C(13)-Fe(1)    | 89.8(6)   |
| C(63)-C(13)-H(13)    | 119.7     |
| C(23)-C(13)-H(13)    | 119.7     |
| Fe(1)-C(13)-H(13)    | 89.5      |
| C(33)-C(23)-C(13)    | 119.3(7)  |
| C(33)-C(23)-C(22)    | 122.0(8)  |
| C(13)-C(23)-C(22)    | 118.7(7)  |
| C(33)-C(23)-K(1)#1   | 75.1(6)   |
| C(13)-C(23)-K(1)#1   | 86.6(5)   |
| C(22)-C(23)-K(1)#1   | 107.9(6)  |
| C(52)-C(62)-C(12)    | 121.8(8)  |
| C(52)-C(62)-C(82)    | 119.1(7)  |
| C(12)-C(62)-C(82)    | 119.1(8)  |
| C(64)-C(54)-C(44)    | 121.0(8)  |
| C(64)-C(54)-H(54)    | 119.5     |
| C(44)-C(54)-H(54)    | 119.5     |
| C(92)-C(102)-C(112)  | 124.0(9)  |
| C(92)-C(102)-H(102)  | 118.0     |
| C(112)-C(102)-H(102) | 118.0     |
| C(202)-C(222)-H(22A) | 109.5     |
| C(202)-C(222)-H(22B) | 109.5     |
| H(22A)-C(222)-H(22B) | 109.5     |
| C(202)-C(222)-H(22C) | 109.5     |
| H(22A)-C(222)-H(22C) | 109.5     |
| H(22B)-C(222)-H(22C) | 109.5     |
| C(92)-C(82)-C(132)   | 119.9(8)  |
| C(92)-C(82)-C(62)    | 120.3(7)  |
| C(132)-C(82)-C(62)   | 119.7(8)  |
| C(31)-C(21)-C(11)    | 118.3(8)  |
| C(31)-C(21)-C(63)    | 119.4(8)  |
| C(11)-C(21)-C(63)    | 122.3(8)  |
| C(141)-C(161)-H(16A) | 109.5     |
| C(141)-C(161)-H(16B) | 109.5     |



|                      |           |
|----------------------|-----------|
| H(16A)-C(161)-H(16B) | 109.5     |
| C(141)-C(161)-H(16C) | 109.5     |
| H(16A)-C(161)-H(16C) | 109.5     |
| H(16B)-C(161)-H(16C) | 109.5     |
| C(142)-C(162)-H(16D) | 109.5     |
| C(142)-C(162)-H(16E) | 109.5     |
| H(16D)-C(162)-H(16E) | 109.5     |
| C(142)-C(162)-H(16F) | 109.5     |
| H(16D)-C(162)-H(16F) | 109.5     |
| H(16E)-C(162)-H(16F) | 109.5     |
| C(21)-C(11)-C(61)    | 119.3(8)  |
| C(21)-C(11)-S(11)    | 123.2(6)  |
| C(61)-C(11)-S(11)    | 117.4(7)  |
| C(132)-C(122)-C(112) | 123.5(9)  |
| C(132)-C(122)-H(122) | 118.2     |
| C(112)-C(122)-H(122) | 118.2     |
| C(122)-C(112)-C(102) | 116.4(9)  |
| C(122)-C(112)-C(172) | 121.1(9)  |
| C(102)-C(112)-C(172) | 122.5(9)  |
| C(212)-C(202)-C(222) | 110.3(9)  |
| C(212)-C(202)-C(132) | 111.0(10) |
| C(222)-C(202)-C(132) | 113.3(8)  |
| C(212)-C(202)-H(202) | 107.4     |
| C(222)-C(202)-H(202) | 107.4     |
| C(132)-C(202)-H(202) | 107.4     |
| C(211)-C(201)-C(131) | 111.8(10) |
| C(211)-C(201)-C(221) | 109.7(9)  |
| C(131)-C(201)-C(221) | 112.5(8)  |
| C(211)-C(201)-H(201) | 107.5     |
| C(131)-C(201)-H(201) | 107.5     |
| C(221)-C(201)-H(201) | 107.5     |
| C(194)-C(204)-H(20A) | 109.5     |
| C(194)-C(204)-H(20B) | 109.5     |
| H(20A)-C(204)-H(20B) | 109.5     |
| C(194)-C(204)-H(20C) | 109.5     |
| H(20A)-C(204)-H(20C) | 109.5     |
| H(20B)-C(204)-H(20C) | 109.5     |
| C(154)-C(134)-C(84)  | 112.9(8)  |
| C(154)-C(134)-C(144) | 109.7(9)  |
| C(84)-C(134)-C(144)  | 111.0(10) |
| C(154)-C(134)-H(134) | 107.7     |
| C(84)-C(134)-H(134)  | 107.7     |
| C(144)-C(134)-H(134) | 107.7     |
| C(23)-C(33)-C(43)    | 118.8(8)  |
| C(23)-C(33)-K(1)#1   | 80.6(6)   |
| C(43)-C(33)-K(1)#1   | 80.8(6)   |
| C(23)-C(33)-H(33)    | 120.6     |
| C(43)-C(33)-H(33)    | 120.6     |
| K(1)#1-C(33)-H(33)   | 108.5     |
| C(81)-C(131)-C(121)  | 119.5(9)  |
| C(81)-C(131)-C(201)  | 121.2(9)  |
| C(121)-C(131)-C(201) | 119.3(8)  |
| C(81)-C(131)-K(2)    | 82.9(6)   |
| C(121)-C(131)-K(2)   | 74.0(6)   |
| C(201)-C(131)-K(2)   | 113.4(6)  |
| C(134)-C(154)-H(15D) | 109.5     |

|                      |           |
|----------------------|-----------|
| C(134)-C(154)-H(15E) | 109.5     |
| H(15D)-C(154)-H(15E) | 109.5     |
| C(134)-C(154)-H(15F) | 109.5     |
| H(15D)-C(154)-H(15F) | 109.5     |
| H(15E)-C(154)-H(15F) | 109.5     |
| C(141)-C(151)-H(15G) | 109.5     |
| C(141)-C(151)-H(15H) | 109.5     |
| H(15G)-C(151)-H(15H) | 109.5     |
| C(141)-C(151)-H(15I) | 109.5     |
| H(15G)-C(151)-H(15I) | 109.5     |
| H(15H)-C(151)-H(15I) | 109.5     |
| C(172)-C(192)-H(19A) | 109.5     |
| C(172)-C(192)-H(19B) | 109.5     |
| H(19A)-C(192)-H(19B) | 109.5     |
| C(172)-C(192)-H(19C) | 109.5     |
| H(19A)-C(192)-H(19C) | 109.5     |
| H(19B)-C(192)-H(19C) | 109.5     |
| C(182)-C(172)-C(112) | 113.8(10) |
| C(182)-C(172)-C(192) | 111.5(10) |
| C(112)-C(172)-C(192) | 111.5(10) |
| C(182)-C(172)-H(172) | 106.5     |
| C(112)-C(172)-H(172) | 106.5     |
| C(192)-C(172)-H(172) | 106.5     |
| C(201)-C(221)-H(22D) | 109.5     |
| C(201)-C(221)-H(22E) | 109.5     |
| H(22D)-C(221)-H(22E) | 109.5     |
| C(201)-C(221)-H(22F) | 109.5     |
| H(22D)-C(221)-H(22F) | 109.5     |
| H(22E)-C(221)-H(22F) | 109.5     |
| C(134)-C(144)-H(14A) | 109.5     |
| C(134)-C(144)-H(14B) | 109.5     |
| H(14A)-C(144)-H(14B) | 109.5     |
| C(134)-C(144)-H(14C) | 109.5     |
| H(14A)-C(144)-H(14C) | 109.5     |
| H(14B)-C(144)-H(14C) | 109.5     |
| C(172)-C(182)-H(18A) | 109.5     |
| C(172)-C(182)-H(18B) | 109.5     |
| H(18A)-C(182)-H(18B) | 109.5     |
| C(172)-C(182)-H(18C) | 109.5     |
| H(18A)-C(182)-H(18C) | 109.5     |
| H(18B)-C(182)-H(18C) | 109.5     |
| C(171)-C(191)-H(19D) | 109.5     |
| C(171)-C(191)-H(19E) | 109.5     |
| H(19D)-C(191)-H(19E) | 109.5     |
| C(171)-C(191)-H(19F) | 109.5     |
| H(19D)-C(191)-H(19F) | 109.5     |
| H(19E)-C(191)-H(19F) | 109.5     |
| C(171)-C(181)-H(18D) | 109.5     |
| C(171)-C(181)-H(18E) | 109.5     |
| H(18D)-C(181)-H(18E) | 109.5     |
| C(171)-C(181)-H(18F) | 109.5     |
| H(18D)-C(181)-H(18F) | 109.5     |
| H(18E)-C(181)-H(18F) | 109.5     |
| C(202)-C(212)-H(21D) | 109.5     |
| C(202)-C(212)-H(21E) | 109.5     |
| H(21D)-C(212)-H(21E) | 109.5     |

|                      |           |
|----------------------|-----------|
| C(202)-C(212)-H(21F) | 109.5     |
| H(21D)-C(212)-H(21F) | 109.5     |
| H(21E)-C(212)-H(21F) | 109.5     |
| C(201)-C(211)-H(21G) | 109.5     |
| C(201)-C(211)-H(21H) | 109.5     |
| H(21G)-C(211)-H(21H) | 109.5     |
| C(201)-C(211)-H(21I) | 109.5     |
| H(21G)-C(211)-H(21I) | 109.5     |
| H(21H)-C(211)-H(21I) | 109.5     |
| C(164)-C(174)-H(17A) | 109.5     |
| C(164)-C(174)-H(17B) | 109.5     |
| H(17A)-C(174)-H(17B) | 109.5     |
| C(164)-C(174)-H(17C) | 109.5     |
| H(17A)-C(174)-H(17C) | 109.5     |
| H(17B)-C(174)-H(17C) | 109.5     |
| C(40)-O(10)-C(30)    | 114.6(17) |
| O(10)-C(30)-C(20)    | 111.6(17) |
| O(10)-C(30)-H(30C)   | 109.3     |
| C(20)-C(30)-H(30C)   | 109.3     |
| O(10)-C(30)-H(30D)   | 109.3     |
| C(20)-C(30)-H(30D)   | 109.3     |
| H(30C)-C(30)-H(30D)  | 108.0     |
| C(30)-C(20)-H(20F)   | 109.5     |
| C(30)-C(20)-H(20G)   | 109.5     |
| H(20F)-C(20)-H(20G)  | 109.5     |
| C(30)-C(20)-H(20H)   | 109.5     |
| H(20F)-C(20)-H(20H)  | 109.5     |
| H(20G)-C(20)-H(20H)  | 109.5     |
| O(10)-C(40)-C(50)    | 114(2)    |
| O(10)-C(40)-H(40C)   | 108.8     |
| C(50)-C(40)-H(40C)   | 108.8     |
| O(10)-C(40)-H(40D)   | 108.8     |
| C(50)-C(40)-H(40D)   | 108.8     |
| H(40C)-C(40)-H(40D)  | 107.7     |
| C(40)-C(50)-H(50C)   | 109.5     |
| C(40)-C(50)-H(50D)   | 109.5     |
| H(50C)-C(50)-H(50D)  | 109.5     |
| C(40)-C(50)-H(50E)   | 109.5     |
| H(50C)-C(50)-H(50E)  | 109.5     |
| H(50D)-C(50)-H(50E)  | 109.5     |
| O(1)-K(1)-F(72)#2    | 82.7(3)   |
| O(1)-K(1)-C(24)      | 127.9(4)  |
| F(72)#2-K(1)-C(24)   | 148.7(3)  |
| O(1)-K(1)-C(33)#2    | 105.6(4)  |
| F(72)#2-K(1)-C(33)#2 | 58.0(2)   |
| C(24)-K(1)-C(33)#2   | 101.7(3)  |
| O(1)-K(1)-C(23)#2    | 81.3(4)   |
| F(72)#2-K(1)-C(23)#2 | 52.3(2)   |
| C(24)-K(1)-C(23)#2   | 118.9(3)  |
| C(33)#2-K(1)-C(23)#2 | 24.3(2)   |
| O(1)-K(1)-C(43)#2    | 116.1(4)  |
| F(72)#2-K(1)-C(43)#2 | 82.3(2)   |
| C(24)-K(1)-C(43)#2   | 78.1(2)   |
| C(33)#2-K(1)-C(43)#2 | 24.6(2)   |
| C(23)#2-K(1)-C(43)#2 | 42.3(2)   |
| O(1)-K(1)-Fe(1)      | 98.2(4)   |

|                      |            |
|----------------------|------------|
| F(72)#2-K(1)-Fe(1)   | 121.87(19) |
| C(24)-K(1)-Fe(1)     | 65.98(17)  |
| C(33)#2-K(1)-Fe(1)   | 155.7(2)   |
| C(23)#2-K(1)-Fe(1)   | 174.2(2)   |
| C(43)#2-K(1)-Fe(1)   | 141.09(19) |
| O(1)-K(1)-C(14)      | 148.6(4)   |
| F(72)#2-K(1)-C(14)   | 127.6(2)   |
| C(24)-K(1)-C(14)     | 24.78(19)  |
| C(33)#2-K(1)-C(14)   | 99.0(2)    |
| C(23)#2-K(1)-C(14)   | 122.1(3)   |
| C(43)#2-K(1)-C(14)   | 80.4(2)    |
| Fe(1)-K(1)-C(14)     | 60.72(16)  |
| O(1)-K(1)-S(31)      | 137.5(4)   |
| F(72)#2-K(1)-S(31)   | 114.30(18) |
| C(24)-K(1)-S(31)     | 49.81(15)  |
| C(33)#2-K(1)-S(31)   | 116.5(2)   |
| C(23)#2-K(1)-S(31)   | 140.5(2)   |
| C(43)#2-K(1)-S(31)   | 105.07(19) |
| Fe(1)-K(1)-S(31)     | 39.37(7)   |
| C(14)-K(1)-S(31)     | 29.95(15)  |
| O(1)-K(1)-C(53)#2    | 101.7(4)   |
| F(72)#2-K(1)-C(53)#2 | 97.7(2)    |
| C(24)-K(1)-C(53)#2   | 72.2(2)    |
| C(33)#2-K(1)-C(53)#2 | 41.4(2)    |
| C(23)#2-K(1)-C(53)#2 | 47.9(2)    |
| C(43)#2-K(1)-C(53)#2 | 22.7(2)    |
| Fe(1)-K(1)-C(53)#2   | 137.60(19) |
| C(14)-K(1)-C(53)#2   | 84.0(2)    |
| S(31)-K(1)-C(53)#2   | 113.26(19) |
| O(1)-K(1)-S(21)      | 78.4(3)    |
| F(72)#2-K(1)-S(21)   | 86.77(17)  |
| C(24)-K(1)-S(21)     | 104.1(2)   |
| C(33)#2-K(1)-S(21)   | 142.9(2)   |
| C(23)#2-K(1)-S(21)   | 136.25(19) |
| C(43)#2-K(1)-S(21)   | 160.4(2)   |
| Fe(1)-K(1)-S(21)     | 38.40(7)   |
| C(14)-K(1)-S(21)     | 93.58(18)  |
| S(31)-K(1)-S(21)     | 64.85(10)  |
| C(53)#2-K(1)-S(21)   | 175.5(2)   |
| O(100)-K(2)-F(71)#2  | 115.0(7)   |
| O(100)-K(2)-S(11)    | 115.6(7)   |
| F(71)#2-K(2)-S(11)   | 101.3(2)   |
| O(100)-K(2)-C(121)   | 100.7(7)   |
| F(71)#2-K(2)-C(121)  | 128.8(3)   |
| S(11)-K(2)-C(121)    | 94.3(3)    |
| O(100)-K(2)-C(31)#2  | 102.8(7)   |
| F(71)#2-K(2)-C(31)#2 | 23.31(19)  |
| S(11)-K(2)-C(31)#2   | 124.4(3)   |
| C(121)-K(2)-C(31)#2  | 117.1(3)   |
| O(100)-K(2)-C(111)   | 113.8(7)   |
| F(71)#2-K(2)-C(111)  | 104.4(3)   |
| S(11)-K(2)-C(111)    | 105.2(3)   |
| C(121)-K(2)-C(111)   | 24.6(2)    |
| C(31)#2-K(2)-C(111)  | 93.2(3)    |
| O(100)-K(2)-C(131)   | 108.2(7)   |
| F(71)#2-K(2)-C(131)  | 134.8(3)   |

|                      |           |
|----------------------|-----------|
| S(11)-K(2)-C(131)    | 69.9(2)   |
| C(121)-K(2)-C(131)   | 24.5(2)   |
| C(31)#2-K(2)-C(131)  | 133.9(3)  |
| C(111)-K(2)-C(131)   | 43.2(2)   |
| O(100)-K(2)-C(101)   | 137.6(7)  |
| F(71)#2-K(2)-C(101)  | 89.3(3)   |
| S(11)-K(2)-C(101)    | 90.7(2)   |
| C(121)-K(2)-C(101)   | 41.7(2)   |
| C(31)#2-K(2)-C(101)  | 86.1(3)   |
| C(111)-K(2)-C(101)   | 23.8(2)   |
| C(131)-K(2)-C(101)   | 48.2(2)   |
| O(100)-K(2)-C(500)   | 20.1(8)   |
| F(71)#2-K(2)-C(500)  | 121.9(7)  |
| S(11)-K(2)-C(500)    | 95.5(7)   |
| C(121)-K(2)-C(500)   | 104.4(7)  |
| C(31)#2-K(2)-C(500)  | 116.7(6)  |
| C(111)-K(2)-C(500)   | 123.9(7)  |
| C(131)-K(2)-C(500)   | 103.2(7)  |
| C(101)-K(2)-C(500)   | 145.9(7)  |
| O(100)-K(2)-C(81)    | 130.1(7)  |
| F(71)#2-K(2)-C(81)   | 114.8(3)  |
| S(11)-K(2)-C(81)     | 56.10(19) |
| C(121)-K(2)-C(81)    | 42.0(2)   |
| C(31)#2-K(2)-C(81)   | 122.3(3)  |
| C(111)-K(2)-C(81)    | 49.3(2)   |
| C(131)-K(2)-C(81)    | 23.5(2)   |
| C(101)-K(2)-C(81)    | 40.8(2)   |
| C(500)-K(2)-C(81)    | 120.7(6)  |
| O(100)-K(2)-C(91)    | 148.7(7)  |
| F(71)#2-K(2)-C(91)   | 93.5(3)   |
| S(11)-K(2)-C(91)     | 67.5(2)   |
| C(121)-K(2)-C(91)    | 48.8(2)   |
| C(31)#2-K(2)-C(91)   | 99.0(3)   |
| C(111)-K(2)-C(91)    | 42.2(2)   |
| C(131)-K(2)-C(91)    | 41.5(2)   |
| C(101)-K(2)-C(91)    | 23.2(2)   |
| C(500)-K(2)-C(91)    | 143.7(7)  |
| C(81)-K(2)-C(91)     | 23.3(2)   |
| C(164)-C(184)-H(18G) | 109.5     |
| C(164)-C(184)-H(18H) | 109.5     |
| H(18G)-C(184)-H(18H) | 109.5     |
| C(164)-C(184)-H(18I) | 109.5     |
| H(18G)-C(184)-H(18I) | 109.5     |
| H(18H)-C(184)-H(18I) | 109.5     |
| C(5)-O(1)-C(2)       | 107.0(18) |
| C(5)-O(1)-K(1)       | 129.5(14) |
| C(2)-O(1)-K(1)       | 123.5(13) |
| O(1)-C(2)-C(3)       | 109(2)    |
| O(1)-C(2)-H(2A)      | 109.8     |
| C(3)-C(2)-H(2A)      | 109.8     |
| O(1)-C(2)-H(2B)      | 109.8     |
| C(3)-C(2)-H(2B)      | 109.8     |
| H(2A)-C(2)-H(2B)     | 108.2     |
| C(2)-C(3)-C(4)       | 96(3)     |
| C(2)-C(3)-H(3A)      | 112.5     |
| C(4)-C(3)-H(3A)      | 112.5     |

|                      |          |
|----------------------|----------|
| C(2)-C(3)-H(3B)      | 112.5    |
| C(4)-C(3)-H(3B)      | 112.5    |
| H(3A)-C(3)-H(3B)     | 110.0    |
| C(5)-C(4)-C(3)       | 96(3)    |
| C(5)-C(4)-H(4A)      | 112.6    |
| C(3)-C(4)-H(4A)      | 112.6    |
| C(5)-C(4)-H(4B)      | 112.6    |
| C(3)-C(4)-H(4B)      | 112.6    |
| H(4A)-C(4)-H(4B)     | 110.1    |
| O(1)-C(5)-C(4)       | 121(3)   |
| O(1)-C(5)-H(5A)      | 107.2    |
| C(4)-C(5)-H(5A)      | 107.2    |
| O(1)-C(5)-H(5B)      | 107.2    |
| C(4)-C(5)-H(5B)      | 107.2    |
| H(5A)-C(5)-H(5B)     | 106.8    |
| C(500)-O(100)-C(200) | 106(2)   |
| C(500)-O(100)-K(2)   | 117(2)   |
| C(200)-O(100)-K(2)   | 132(2)   |
| O(100)-C(200)-C(300) | 110(3)   |
| O(100)-C(200)-H(20D) | 109.6    |
| C(300)-C(200)-H(20D) | 109.6    |
| O(100)-C(200)-H(20E) | 109.6    |
| C(300)-C(200)-H(20E) | 109.6    |
| H(20D)-C(200)-H(20E) | 108.1    |
| C(200)-C(300)-C(400) | 99(3)    |
| C(200)-C(300)-H(30A) | 111.9    |
| C(400)-C(300)-H(30A) | 111.9    |
| C(200)-C(300)-H(30B) | 111.9    |
| C(400)-C(300)-H(30B) | 111.9    |
| H(30A)-C(300)-H(30B) | 109.6    |
| C(500)-C(400)-C(300) | 93(3)    |
| C(500)-C(400)-H(40A) | 113.1    |
| C(300)-C(400)-H(40A) | 113.1    |
| C(500)-C(400)-H(40B) | 113.1    |
| C(300)-C(400)-H(40B) | 113.1    |
| H(40A)-C(400)-H(40B) | 110.5    |
| O(100)-C(500)-C(400) | 113(3)   |
| O(100)-C(500)-K(2)   | 42.8(18) |
| C(400)-C(500)-K(2)   | 120(3)   |
| O(100)-C(500)-H(50A) | 108.9    |
| C(400)-C(500)-H(50A) | 108.9    |
| K(2)-C(500)-H(50A)   | 66.8     |
| O(100)-C(500)-H(50B) | 108.9    |
| C(400)-C(500)-H(50B) | 108.9    |
| K(2)-C(500)-H(50B)   | 129.7    |
| H(50A)-C(500)-H(50B) | 107.7    |

---

Symmetry transformations used to generate equivalent atoms:

#1 x-1,y,z #2 x+1,y,z

**Anisotropic displacement parameters ( $\text{\AA}^2 \times 10^3$ ) for [LFeSC<sub>6</sub>H<sub>4</sub>Ar]K (5). The anisotropic displacement factor exponent takes the form:  $-2\pi^2 [h^2 a^{*2} U^{11} + \dots + 2 h k a^* b^* U^{12}]$**

|        | U <sup>11</sup> | U <sup>22</sup> | U <sup>33</sup> | U <sup>23</sup> | U <sup>13</sup> | U <sup>12</sup> |
|--------|-----------------|-----------------|-----------------|-----------------|-----------------|-----------------|
| Fe(1)  | 118(1)          | 50(1)           | 43(1)           | 4(1)            | 4(1)            | 26(1)           |
| S(11)  | 48(2)           | 52(1)           | 61(1)           | -9(1)           | 5(1)            | 2(1)            |
| S(21)  | 55(2)           | 63(2)           | 66(2)           | 19(1)           | 10(1)           | 13(1)           |
| S(31)  | 97(2)           | 61(2)           | 67(2)           | -20(1)          | -29(1)          | 34(2)           |
| F(72)  | 52(3)           | 58(3)           | 85(4)           | 13(3)           | 27(3)           | 6(2)            |
| F(71)  | 47(3)           | 77(3)           | 62(3)           | 2(3)            | 10(3)           | -1(3)           |
| C(24)  | 51(5)           | 38(4)           | 51(5)           | 0(4)            | 3(4)            | 1(4)            |
| C(61)  | 48(6)           | 46(5)           | 56(6)           | 2(4)            | 7(5)            | -4(4)           |
| C(81)  | 59(6)           | 43(5)           | 46(5)           | -6(4)           | 3(4)            | -2(4)           |
| C(53)  | 49(6)           | 53(5)           | 50(5)           | 7(4)            | 5(4)            | 0(4)            |
| C(194) | 51(6)           | 57(5)           | 42(5)           | -4(4)           | 2(4)            | 5(4)            |
| C(34)  | 47(5)           | 43(5)           | 53(5)           | 1(4)            | 4(4)            | 3(4)            |
| C(41)  | 67(7)           | 46(5)           | 61(6)           | 0(5)            | -2(5)           | -13(5)          |
| C(22)  | 43(6)           | 48(5)           | 49(5)           | -3(4)           | 4(4)            | 3(4)            |
| C(32)  | 51(6)           | 52(5)           | 56(5)           | 4(4)            | 16(5)           | 2(4)            |
| C(142) | 47(5)           | 52(5)           | 36(4)           | 0(4)            | 5(4)            | 7(4)            |
| C(91)  | 41(5)           | 42(5)           | 55(5)           | -3(4)           | 8(4)            | -4(4)           |
| C(141) | 49(6)           | 60(6)           | 46(5)           | 0(4)            | 3(4)            | 0(4)            |
| C(111) | 65(6)           | 56(5)           | 44(5)           | -2(4)           | 6(4)            | 4(5)            |
| C(84)  | 47(5)           | 44(5)           | 61(5)           | 1(4)            | 11(4)           | 6(4)            |
| C(92)  | 45(5)           | 45(5)           | 40(5)           | -4(4)           | 0(4)            | 2(4)            |
| C(51)  | 52(6)           | 50(5)           | 57(6)           | -5(4)           | 2(5)            | -1(5)           |
| C(74)  | 50(5)           | 43(4)           | 41(4)           | 3(4)            | 7(4)            | 7(5)            |
| C(42)  | 60(6)           | 46(5)           | 62(6)           | 6(4)            | 10(5)           | 14(4)           |
| C(43)  | 57(5)           | 46(5)           | 53(5)           | 9(4)            | 14(4)           | 7(4)            |
| C(124) | 52(6)           | 49(5)           | 41(5)           | 2(4)            | 9(4)            | 0(4)            |
| C(104) | 57(6)           | 52(5)           | 44(5)           | 1(4)            | 7(4)            | 8(4)            |
| C(101) | 54(6)           | 44(5)           | 56(6)           | -5(4)           | 0(5)            | 0(4)            |
| C(214) | 76(8)           | 56(6)           | 84(7)           | 8(5)            | 36(6)           | -1(5)           |
| C(114) | 60(6)           | 45(5)           | 54(5)           | 0(4)            | 7(5)            | -1(4)           |
| C(94)  | 59(6)           | 49(5)           | 62(6)           | 3(4)            | 14(5)           | 4(4)            |
| C(52)  | 44(5)           | 45(5)           | 53(5)           | 7(4)            | 5(4)            | 7(4)            |
| C(63)  | 40(5)           | 46(5)           | 52(5)           | 2(4)            | 1(4)            | 3(4)            |
| C(64)  | 39(5)           | 36(4)           | 58(5)           | 0(4)            | 5(4)            | 7(4)            |
| C(31)  | 46(6)           | 58(5)           | 49(5)           | 6(4)            | 1(4)            | -1(5)           |
| C(132) | 59(6)           | 60(5)           | 40(5)           | -6(4)           | -1(4)           | -5(4)           |
| C(14)  | 49(5)           | 41(4)           | 42(5)           | 6(4)            | -5(4)           | -2(4)           |
| C(12)  | 58(6)           | 38(4)           | 44(5)           | 3(4)            | -2(4)           | 3(4)            |
| C(171) | 68(7)           | 103(7)          | 56(6)           | -13(5)          | 14(5)           | 10(5)           |
| C(164) | 66(6)           | 50(5)           | 52(5)           | -10(4)          | 13(4)           | 6(4)            |
| C(121) | 73(7)           | 58(5)           | 49(5)           | -1(4)           | 13(5)           | -8(5)           |
| C(44)  | 54(6)           | 60(5)           | 44(5)           | -4(4)           | -6(4)           | 14(4)           |
| C(152) | 62(6)           | 66(6)           | 44(5)           | -2(4)           | -6(5)           | 11(5)           |
| C(13)  | 53(5)           | 41(4)           | 48(4)           | 8(4)            | 8(4)            | 11(5)           |
| C(23)  | 59(6)           | 43(5)           | 51(5)           | 7(4)            | 15(4)           | 4(4)            |
| C(62)  | 48(6)           | 51(5)           | 40(5)           | 1(4)            | -4(4)           | 1(4)            |
| C(54)  | 55(6)           | 54(5)           | 41(5)           | -1(4)           | 0(4)            | 13(5)           |
| C(102) | 52(6)           | 68(6)           | 46(5)           | -11(4)          | 7(5)            | -11(5)          |
| C(222) | 62(6)           | 78(6)           | 54(5)           | -8(4)           | 4(4)            | 4(5)            |
| C(82)  | 43(5)           | 46(5)           | 43(5)           | 3(4)            | 2(4)            | -2(4)           |

|        |         |         |         |          |         |          |
|--------|---------|---------|---------|----------|---------|----------|
| C(21)  | 56(6)   | 44(5)   | 41(5)   | 3(4)     | -1(4)   | 2(4)     |
| C(161) | 80(7)   | 54(6)   | 62(6)   | 8(5)     | 6(5)    | -13(5)   |
| C(162) | 68(7)   | 54(5)   | 47(5)   | -7(4)    | 3(5)    | 11(5)    |
| C(11)  | 51(6)   | 43(5)   | 45(5)   | -3(4)    | 0(4)    | 4(4)     |
| C(122) | 69(7)   | 75(6)   | 48(5)   | -15(5)   | 8(5)    | -19(5)   |
| C(112) | 61(7)   | 74(6)   | 55(6)   | -15(5)   | 20(5)   | -11(5)   |
| C(202) | 89(7)   | 75(6)   | 48(5)   | -3(4)    | -9(5)   | -27(5)   |
| C(201) | 96(9)   | 62(6)   | 63(7)   | 19(5)    | 14(6)   | 24(6)    |
| C(204) | 71(7)   | 81(7)   | 62(6)   | -8(5)    | 17(6)   | -10(6)   |
| C(134) | 64(7)   | 52(6)   | 93(8)   | -7(5)    | 29(6)   | 5(5)     |
| C(33)  | 59(6)   | 46(5)   | 50(5)   | 2(4)     | 15(4)   | 8(4)     |
| C(131) | 69(7)   | 46(5)   | 48(5)   | -3(4)    | 6(5)    | 11(4)    |
| C(154) | 71(8)   | 76(7)   | 92(8)   | -11(6)   | 15(6)   | -18(6)   |
| C(151) | 80(8)   | 66(6)   | 44(5)   | 0(4)     | -6(5)   | -8(5)    |
| C(192) | 88(9)   | 74(7)   | 116(10) | 7(7)     | 51(8)   | -8(6)    |
| C(172) | 72(8)   | 109(9)  | 60(7)   | -22(6)   | 20(6)   | -39(7)   |
| C(221) | 79(8)   | 94(8)   | 65(7)   | 21(6)    | 1(6)    | 3(6)     |
| C(144) | 98(10)  | 53(6)   | 182(15) | 13(8)    | 27(10)  | -3(6)    |
| C(182) | 73(9)   | 182(15) | 118(11) | 27(11)   | 46(8)   | 23(10)   |
| C(191) | 100(10) | 198(13) | 94(9)   | -66(9)   | 8(7)    | 31(9)    |
| C(181) | 90(9)   | 159(11) | 91(9)   | 22(8)    | 13(7)   | -12(8)   |
| C(212) | 180(13) | 61(6)   | 114(10) | -12(6)   | -87(9)  | -11(7)   |
| C(211) | 214(18) | 63(8)   | 116(11) | 2(7)     | -53(11) | 35(9)    |
| C(174) | 139(12) | 270(20) | 113(11) | -114(13) | -1(8)   | 7(11)    |
| O(10)  | 126(9)  | 247(16) | 104(8)  | 26(9)    | -16(7)  | -65(10)  |
| C(30)  | 143(15) | 207(18) | 119(13) | 50(15)   | 58(13)  | 18(17)   |
| C(20)  | 131(15) | 230(30) | 230(30) | -63(19)  | 5(17)   | -68(16)  |
| C(40)  | 129(16) | 159(15) | 169(19) | 21(14)   | -20(16) | 13(14)   |
| C(50)  | 190(20) | 480(50) | 170(20) | 180(30)  | -44(18) | -140(30) |
| K(1)   | 127(4)  | 105(4)  | 95(3)   | 35(2)    | 45(3)   | -1(3)    |
| K(2)   | 59(4)   | 94(5)   | 64(4)   | -8(3)    | 9(3)    | 14(3)    |
| C(184) | 286(19) | 121(10) | 83(9)   | 2(7)     | 43(10)  | 120(13)  |
| O(1)   | 122(10) | 97(9)   | 105(10) | 14(6)    | -22(8)  | 7(7)     |
| C(2)   | 180(30) | 108(12) | 107(15) | 3(10)    | -25(14) | 16(12)   |
| C(3)   | 440(50) | 132(19) | 220(30) | -12(15)  | 140(30) | -30(20)  |
| C(4)   | 590(80) | 127(18) | 124(15) | -11(13)  | 80(30)  | -10(30)  |
| C(5)   | 240(40) | 108(13) | 90(13)  | 10(10)   | -29(14) | -2(13)   |

**Hydrogen coordinates ( x 10<sup>4</sup>) and isotropic displacement parameters (Å<sup>2</sup>x 10<sup>3</sup>)  
for [LFeSC<sub>6</sub>H<sub>4</sub>Ar]K (5).**

|        | x    | y    | z    | U(eq) |
|--------|------|------|------|-------|
| H(24)  | 7335 | 4091 | 4947 | 56    |
| H(53)  | 1757 | 4052 | 5313 | 61    |
| H(194) | 9331 | 5478 | 6460 | 60    |
| H(34)  | 9053 | 3394 | 5394 | 57    |
| H(41)  | 481  | 2810 | 3187 | 70    |
| H(142) | 5280 | 7325 | 4383 | 54    |
| H(141) | 5105 | 2645 | 3996 | 62    |



|        |       |      |      |     |
|--------|-------|------|------|-----|
| H(51)  | 2634  | 2578 | 2594 | 64  |
| H(42)  | 403   | 7327 | 3655 | 67  |
| H(43)  | 1501  | 4904 | 6047 | 62  |
| H(101) | 8096  | 2262 | 2822 | 61  |
| H(21A) | 8006  | 6329 | 6133 | 107 |
| H(21B) | 9717  | 6471 | 6103 | 107 |
| H(21C) | 8799  | 6701 | 6813 | 107 |
| H(114) | 8098  | 6363 | 8033 | 63  |
| H(94)  | 4922  | 5210 | 8615 | 68  |
| H(52)  | 2532  | 7645 | 3071 | 57  |
| H(171) | 9769  | 2348 | 1837 | 91  |
| H(164) | 5301  | 6029 | 9387 | 67  |
| H(121) | 6970  | 3348 | 1064 | 71  |
| H(44)  | 10088 | 3474 | 6630 | 63  |
| H(15A) | 7811  | 7127 | 4573 | 86  |
| H(15B) | 7262  | 7609 | 5183 | 86  |
| H(15C) | 8161  | 7827 | 4462 | 86  |
| H(13)  | 2778  | 5078 | 3489 | 57  |
| H(54)  | 9190  | 4218 | 7466 | 60  |
| H(102) | 8020  | 7920 | 3184 | 66  |
| H(22A) | 3253  | 7355 | 1054 | 97  |
| H(22B) | 2747  | 6713 | 724  | 97  |
| H(22C) | 4374  | 6948 | 595  | 97  |
| H(16A) | 4660  | 1736 | 3320 | 98  |
| H(16B) | 5191  | 1617 | 4189 | 98  |
| H(16C) | 6309  | 1532 | 3510 | 98  |
| H(16D) | 6008  | 8531 | 3995 | 84  |
| H(16E) | 5364  | 8345 | 4805 | 84  |
| H(16F) | 4395  | 8257 | 4034 | 84  |
| H(122) | 6503  | 7157 | 1243 | 77  |
| H(202) | 3200  | 6612 | 2020 | 85  |
| H(201) | 3523  | 3774 | 1820 | 88  |
| H(20A) | 10663 | 6143 | 7670 | 107 |
| H(20B) | 11463 | 5888 | 6934 | 107 |
| H(20C) | 10841 | 5432 | 7555 | 107 |
| H(134) | 5502  | 4183 | 7057 | 83  |
| H(33)  | 1906  | 5869 | 5531 | 62  |
| H(15D) | 3278  | 4583 | 8033 | 119 |
| H(15E) | 3099  | 4076 | 7385 | 119 |
| H(15F) | 3366  | 4761 | 7147 | 119 |
| H(15G) | 8057  | 2232 | 4132 | 95  |
| H(15H) | 6997  | 2354 | 4828 | 95  |
| H(15I) | 7575  | 2905 | 4330 | 95  |
| H(19A) | 7833  | 7943 | 621  | 137 |
| H(19B) | 9080  | 8426 | 827  | 137 |
| H(19C) | 7498  | 8490 | 1185 | 137 |
| H(172) | 9290  | 8099 | 2072 | 96  |
| H(22D) | 4847  | 3605 | 371  | 118 |
| H(22E) | 3204  | 3820 | 498  | 118 |
| H(22F) | 3683  | 3146 | 708  | 118 |
| H(14A) | 6623  | 3752 | 8144 | 165 |
| H(14B) | 4976  | 3511 | 8089 | 165 |
| H(14C) | 5420  | 4030 | 8688 | 165 |
| H(18A) | 10173 | 7146 | 1945 | 185 |
| H(18B) | 10613 | 7547 | 1226 | 185 |
| H(18C) | 9310  | 7069 | 1140 | 185 |

|        |       |      |       |     |
|--------|-------|------|-------|-----|
| H(19D) | 8146  | 1861 | 946   | 196 |
| H(19E) | 9656  | 2038 | 565   | 196 |
| H(19F) | 8224  | 2435 | 395   | 196 |
| H(18D) | 9455  | 3389 | 877   | 170 |
| H(18E) | 10927 | 3005 | 981   | 170 |
| H(18F) | 10316 | 3376 | 1689  | 170 |
| H(21D) | 5426  | 6045 | 1195  | 180 |
| H(21E) | 3814  | 5788 | 1308  | 180 |
| H(21F) | 4932  | 5842 | 2028  | 180 |
| H(21G) | 5086  | 4556 | 2023  | 198 |
| H(21H) | 4362  | 4650 | 1185  | 198 |
| H(21I) | 5992  | 4394 | 1281  | 198 |
| H(17A) | 7552  | 6819 | 9523  | 260 |
| H(17B) | 8078  | 6134 | 9477  | 260 |
| H(17C) | 6983  | 6337 | 10126 | 260 |
| H(30C) | 10451 | 5449 | 9022  | 187 |
| H(30D) | 11298 | 4820 | 8983  | 187 |
| H(20F) | 12851 | 5538 | 9411  | 296 |
| H(20G) | 12580 | 5072 | 10091 | 296 |
| H(20H) | 11778 | 5712 | 10083 | 296 |
| H(40C) | 9177  | 4274 | 9175  | 184 |
| H(40D) | 8459  | 4923 | 9049  | 184 |
| H(50C) | 6743  | 4678 | 9780  | 422 |
| H(50D) | 7897  | 4588 | 10478 | 422 |
| H(50E) | 7487  | 4035 | 9926  | 422 |
| H(18G) | 5688  | 7158 | 8954  | 244 |
| H(18H) | 4201  | 6779 | 8937  | 244 |
| H(18I) | 5216  | 6780 | 8206  | 244 |
| H(2A)  | 8307  | 4575 | 2331  | 161 |
| H(2B)  | 9746  | 4391 | 2823  | 161 |
| H(3A)  | 9901  | 4601 | 1406  | 313 |
| H(3B)  | 11231 | 4807 | 1983  | 313 |
| H(4A)  | 10424 | 5903 | 1619  | 333 |
| H(4B)  | 8784  | 5685 | 1375  | 333 |
| H(5A)  | 9838  | 6013 | 2749  | 176 |
| H(5B)  | 8187  | 5889 | 2488  | 176 |
| H(20D) | 10500 | 5126 | 1270  | 88  |
| H(20E) | 11206 | 4873 | 2058  | 88  |
| H(30A) | 10960 | 6019 | 1666  | 246 |
| H(30B) | 11489 | 5767 | 2499  | 246 |
| H(40A) | 8858  | 5879 | 3035  | 138 |
| H(40B) | 8512  | 6317 | 2304  | 138 |
| H(50A) | 7290  | 5338 | 2320  | 126 |
| H(50B) | 7986  | 5562 | 1541  | 126 |

---

## ***Experimental and Refinement Details for [LFeSC<sub>6</sub>H<sub>4</sub>Ar(THF)]K (5·THF)***

Single crystals of [LFeSC<sub>6</sub>H<sub>4</sub>Ar(THF)]K (**5**·THF) for X-ray analysis were obtained at -40 °C from a concentrated solution of [LFeSC<sub>6</sub>H<sub>4</sub>Ar]K (**5**) in THF. Crystals were taken into cold Fomblin Y oil in the cold well (-70 °C) and transported cold (-78 °C) in a closed jar. Suitable crystal was selected under microscope while keeping the sample under cold nitrogen stream (< -80 °C). The pin with the crystal was immediately placed in the cold (liquid N<sub>2</sub>) cryo-tongs, transported on dry ice, and the crystal was placed on the goniometer under a cold nitrogen stream. Low-temperature diffraction data ( $\omega$ -scans) were collected on a Rigaku MicroMax-007HF diffractometer coupled to a Saturn994+ CCD detector with Cu K $\alpha$  ( $\lambda = 1.54178$  Å). All structures were solved by direct methods and were refined against F<sup>2</sup> on all data by full-matrix least squares<sup>50</sup>. All non-hydrogen atoms were refined anisotropically. Unless stated otherwise, hydrogen atoms were included in the model at geometrically calculated positions and refined using a riding model. The isotropic displacement parameters of all hydrogen atoms were fixed to 1.2 times the U value of the atoms to which they are linked (1.5 times for methyl groups).

Two of the four THF solvents were disordered. Atoms {C30, C40} were modeled with a major and minor component delineated with the suffixes "a" and "b", respectively. The site occupancies were freely refined to convergence at values of 0.77(8) and 0.23(1). The RIGU command was used to aid in the convergence of C30 and C40. This rigid bond restraint was needed due to the near superposition of the carbon atoms positions as a result of disorder. Atoms {O16 C17} were modeled with major and minor components delineated with the suffixes "a" and "b", respectively. The site occupancies were refined, and converged at values of 0.67(1) and 0.33(1). The rigid bond restraint was used in this model for similar reasons as mentioned previously with atoms C30 and C40. However, the bond distances were chemically unreasonable and therefore required additional similarity restraints. A SIMU command with a standard deviation of 0.002 was used to establish the {C200-C190, C190-C180, C180-C17B, C180-C17A} bonds as similar.

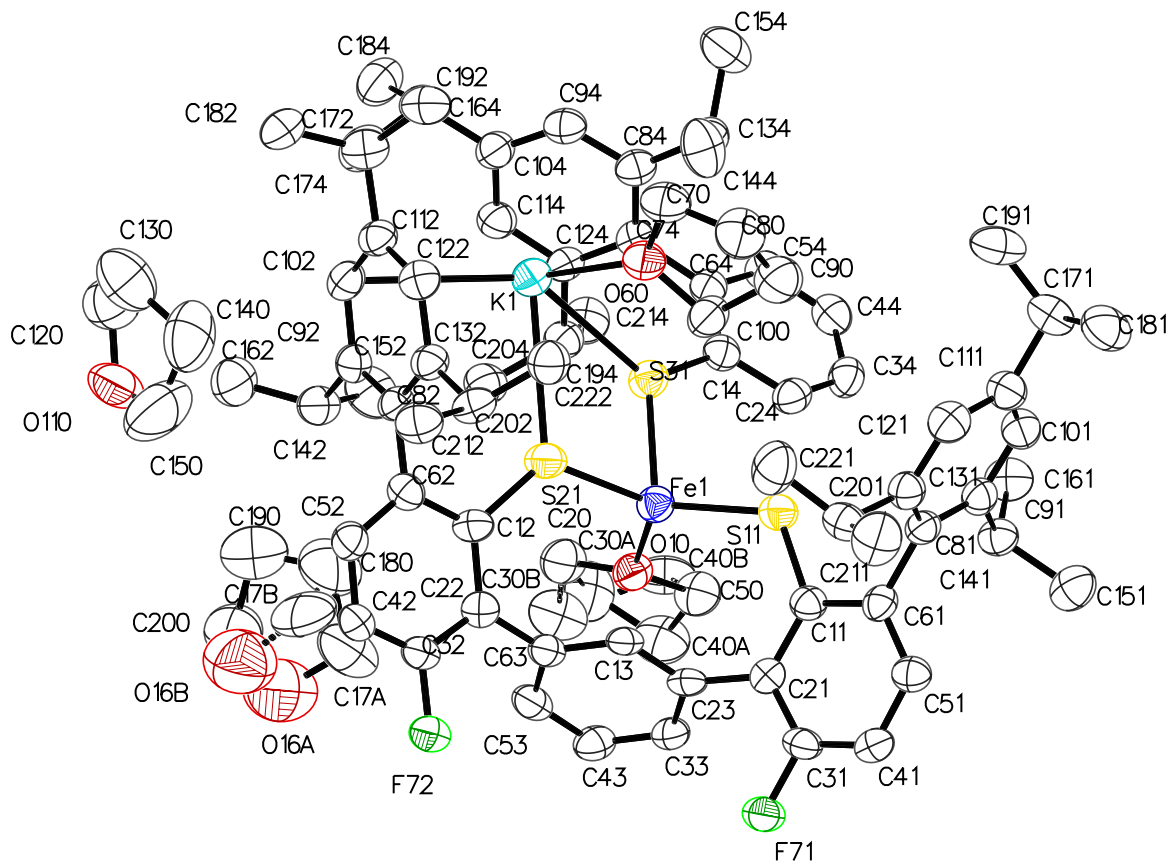

The full numbering scheme of [LFeSC<sub>6</sub>H<sub>4</sub>Ar(THF)]K (**5**·THF). All atoms shown are depicted with 50% thermal contours. The hydrogen atoms have been removed for clarity.

## Crystal data and structure refinement for [LFeSC<sub>6</sub>H<sub>4</sub>Ar(THF)]K (5·THF).

|                                   |                                                                                                                                                          |
|-----------------------------------|----------------------------------------------------------------------------------------------------------------------------------------------------------|
| Identification code               | 007-15021                                                                                                                                                |
| Empirical formula                 | C85 H113 F2 Fe K O4 S3                                                                                                                                   |
| Formula weight                    | 1427.88                                                                                                                                                  |
| Temperature                       | 93(2) K                                                                                                                                                  |
| Wavelength                        | 1.54187 Å                                                                                                                                                |
| Crystal system                    | Monoclinic                                                                                                                                               |
| Space group                       | P 2 <sub>1</sub> /c                                                                                                                                      |
| Unit cell dimensions              | a = 17.371(5) Å                      α = 90°.<br>b = 16.4629(3) Å                     β = 107.059(10)°.<br>c = 28.368(2) Å                      γ = 90°. |
| Volume                            | 7756(2) Å <sup>3</sup>                                                                                                                                   |
| Z                                 | 4                                                                                                                                                        |
| Density (calculated)              | 1.223 g/cm <sup>3</sup>                                                                                                                                  |
| Absorption coefficient            | 3.210 mm <sup>-1</sup>                                                                                                                                   |
| F(000)                            | 3064                                                                                                                                                     |
| Crystal size                      | 0.190 x 0.180 x 0.020 mm <sup>3</sup>                                                                                                                    |
| Crystal color and habit           | Yellow plate                                                                                                                                             |
| Diffractometer                    | Rigaku Saturn 944+ CCD                                                                                                                                   |
| Θ range for data collection       | 2.661 to 66.603°.                                                                                                                                        |
| Index ranges                      | -20 ≤ h ≤ 20, -19 ≤ k ≤ 19, -32 ≤ l ≤ 31                                                                                                                 |
| Reflections collected             | 172297                                                                                                                                                   |
| Independent reflections           | 13584 [R(int) = 0.2073]                                                                                                                                  |
| Observed reflections (I > 2σ(I))  | 6660                                                                                                                                                     |
| Completeness to θ = 66.603°       | 99.1 %                                                                                                                                                   |
| Absorption correction             | Semi-empirical from equivalents                                                                                                                          |
| Max. and min. transmission        | 0.939 and 0.572                                                                                                                                          |
| Solution method                   | SHELXS-2013 (Sheldrick, 2013)                                                                                                                            |
| Refinement method                 | SHELXL-2014/7 (Sheldrick, 2014)                                                                                                                          |
| Data / restraints / parameters    | 13584 / 87 / 921                                                                                                                                         |
| Goodness-of-fit on F <sup>2</sup> | 0.906                                                                                                                                                    |
| Final R indices [I > 2σ(I)]       | R1 = 0.0663, wR2 = 0.1469                                                                                                                                |
| R indices (all data)              | R1 = 0.1314, wR2 = 0.1720                                                                                                                                |
| Largest diff. peak and hole       | 0.880 and -0.492 e.Å <sup>-3</sup>                                                                                                                       |

**Atomic coordinates (  $\times 10^4$ ) and equivalent isotropic displacement parameters ( $\text{\AA}^2 \times 10^3$ ) for [LFeSC<sub>6</sub>H<sub>4</sub>Ar(THF)]K (5·THF). U(eq) is defined as one third of the trace of the orthogonalized U<sup>ij</sup> tensor.**

|        | x        | y       | z       | U(eq) |
|--------|----------|---------|---------|-------|
| Fe(1)  | 7030(1)  | 3166(1) | 6990(1) | 41(1) |
| S(11)  | 5753(1)  | 3337(1) | 7060(1) | 45(1) |
| S(21)  | 7385(1)  | 2030(1) | 6618(1) | 54(1) |
| S(31)  | 7068(1)  | 3846(1) | 6262(1) | 45(1) |
| C(11)  | 5553(2)  | 3022(2) | 7606(2) | 38(1) |
| C(21)  | 6150(2)  | 2774(2) | 8041(2) | 37(1) |
| C(31)  | 5915(3)  | 2622(2) | 8456(2) | 41(1) |
| C(41)  | 5135(3)  | 2687(2) | 8476(2) | 43(1) |
| C(51)  | 4554(3)  | 2893(2) | 8046(2) | 42(1) |
| C(61)  | 4742(2)  | 3046(2) | 7612(2) | 39(1) |
| F(71)  | 6481(1)  | 2378(1) | 8878(1) | 49(1) |
| C(81)  | 4058(2)  | 3218(3) | 7151(2) | 38(1) |
| C(91)  | 3809(3)  | 4018(2) | 7026(2) | 41(1) |
| C(101) | 3148(3)  | 4150(3) | 6611(2) | 48(1) |
| C(111) | 2749(3)  | 3526(3) | 6318(2) | 48(1) |
| C(121) | 3017(3)  | 2733(3) | 6448(2) | 49(1) |
| C(131) | 3670(3)  | 2562(3) | 6864(2) | 44(1) |
| C(141) | 4219(3)  | 4725(2) | 7341(2) | 44(1) |
| C(151) | 3720(3)  | 4973(3) | 7684(2) | 60(1) |
| C(161) | 4347(3)  | 5453(3) | 7038(2) | 59(1) |
| C(171) | 2050(3)  | 3693(3) | 5858(2) | 58(1) |
| C(181) | 1257(3)  | 3378(3) | 5918(2) | 72(2) |
| C(191) | 2192(3)  | 3394(3) | 5395(2) | 69(2) |
| C(201) | 3942(3)  | 1697(3) | 6984(2) | 50(1) |
| C(211) | 3271(3)  | 1140(3) | 7045(2) | 76(2) |
| C(221) | 4311(3)  | 1337(3) | 6614(2) | 75(2) |
| C(12)  | 7951(3)  | 1229(2) | 6958(2) | 42(1) |
| C(22)  | 8162(2)  | 1177(2) | 7478(2) | 41(1) |
| C(32)  | 8565(3)  | 480(3)  | 7694(2) | 44(1) |
| C(42)  | 8773(3)  | -151(3) | 7446(2) | 46(1) |
| C(52)  | 8578(2)  | -79(3)  | 6939(2) | 46(1) |
| C(62)  | 8173(2)  | 592(2)  | 6687(2) | 40(1) |
| F(72)  | 8734(1)  | 408(1)  | 8196(1) | 57(1) |
| C(82)  | 7962(3)  | 624(2)  | 6135(2) | 41(1) |
| C(92)  | 8506(3)  | 945(2)  | 5908(2) | 43(1) |
| C(102) | 8283(3)  | 964(2)  | 5389(2) | 45(1) |
| C(112) | 7551(3)  | 673(2)  | 5098(2) | 43(1) |
| C(122) | 7027(3)  | 356(2)  | 5337(2) | 45(1) |
| C(132) | 7212(3)  | 330(2)  | 5852(2) | 42(1) |
| C(142) | 9314(3)  | 1300(3) | 6201(2) | 51(1) |
| C(152) | 9268(3)  | 2237(3) | 6198(2) | 75(2) |
| C(162) | 10017(3) | 1027(3) | 6025(2) | 72(2) |
| C(172) | 7359(3)  | 691(3)  | 4538(2) | 53(1) |
| C(182) | 7799(3)  | 26(3)   | 4354(2) | 74(2) |
| C(192) | 6461(3)  | 663(3)  | 4264(2) | 62(1) |
| C(202) | 6626(3)  | -42(2)  | 6094(2) | 47(1) |
| C(212) | 6720(3)  | -968(3) | 6122(2) | 57(1) |
| C(222) | 5750(3)  | 201(3)  | 5847(2) | 56(1) |

|        |           |          |          |        |
|--------|-----------|----------|----------|--------|
| C(13)  | 7186(2)   | 2041(2)  | 7756(1)  | 35(1)  |
| C(23)  | 7006(3)   | 2621(2)  | 8065(1)  | 38(1)  |
| C(33)  | 7645(3)   | 2991(3)  | 8418(2)  | 43(1)  |
| C(43)  | 8431(3)   | 2790(3)  | 8458(2)  | 46(1)  |
| C(53)  | 8603(3)   | 2198(3)  | 8151(2)  | 47(1)  |
| C(63)  | 7978(3)   | 1817(2)  | 7794(2)  | 40(1)  |
| C(14)  | 6794(2)   | 4877(2)  | 6182(2)  | 40(1)  |
| C(24)  | 6410(2)   | 5274(3)  | 6490(2)  | 43(1)  |
| C(34)  | 6250(2)   | 6093(3)  | 6444(2)  | 45(1)  |
| C(44)  | 6467(2)   | 6543(3)  | 6087(2)  | 47(1)  |
| C(54)  | 6818(2)   | 6161(2)  | 5771(2)  | 43(1)  |
| C(64)  | 6987(2)   | 5330(2)  | 5807(2)  | 38(1)  |
| C(74)  | 7375(3)   | 4927(2)  | 5464(2)  | 39(1)  |
| C(84)  | 6911(3)   | 4656(2)  | 4996(2)  | 44(1)  |
| C(94)  | 7307(3)   | 4262(2)  | 4699(2)  | 46(1)  |
| C(104) | 8118(3)   | 4121(3)  | 4837(2)  | 45(1)  |
| C(114) | 8566(3)   | 4410(3)  | 5301(2)  | 46(1)  |
| C(124) | 8212(3)   | 4808(2)  | 5615(2)  | 40(1)  |
| C(134) | 6009(3)   | 4766(3)  | 4816(2)  | 48(1)  |
| C(144) | 5599(3)   | 3961(3)  | 4818(2)  | 71(2)  |
| C(154) | 5712(3)   | 5118(3)  | 4298(2)  | 74(2)  |
| C(164) | 8512(3)   | 3677(3)  | 4504(2)  | 49(1)  |
| C(174) | 8798(3)   | 2844(3)  | 4714(2)  | 78(2)  |
| C(184) | 9198(3)   | 4139(3)  | 4405(2)  | 70(2)  |
| C(194) | 8731(3)   | 5118(3)  | 6115(2)  | 48(1)  |
| C(204) | 9466(3)   | 4597(3)  | 6347(2)  | 55(1)  |
| C(214) | 8980(3)   | 5998(3)  | 6070(2)  | 62(1)  |
| K(1)   | 7130(1)   | 2505(1)  | 5504(1)  | 52(1)  |
| O(10)  | 7970(2)   | 3787(2)  | 7467(1)  | 45(1)  |
| C(20)  | 8767(3)   | 3839(3)  | 7401(2)  | 63(1)  |
| C(30A) | 9117(5)   | 4638(7)  | 7660(4)  | 83(3)  |
| C(40A) | 8608(4)   | 4853(5)  | 7985(4)  | 77(3)  |
| C(30B) | 9303(19)  | 4236(19) | 7774(12) | 75(7)  |
| C(40B) | 8503(15)  | 5138(15) | 7600(11) | 72(7)  |
| C(50)  | 7813(3)   | 4556(3)  | 7671(2)  | 58(1)  |
| O(60)  | 5559(2)   | 2193(2)  | 5376(1)  | 53(1)  |
| C(70)  | 4891(3)   | 1906(3)  | 4987(2)  | 61(1)  |
| C(80)  | 4172(3)   | 1941(3)  | 5189(2)  | 72(2)  |
| C(90)  | 4373(3)   | 2640(3)  | 5539(2)  | 72(2)  |
| C(100) | 5271(3)   | 2547(3)  | 5761(2)  | 57(1)  |
| O(110) | 9960(3)   | -1160(2) | 5864(2)  | 95(1)  |
| C(120) | 9756(4)   | -1060(4) | 5353(2)  | 92(2)  |
| C(130) | 9105(4)   | -1638(4) | 5158(3)  | 102(2) |
| C(140) | 8621(4)   | -1606(5) | 5519(3)  | 116(2) |
| C(150) | 9323(5)   | -1537(6) | 5989(3)  | 140(3) |
| O(16A) | 11613(5)  | 2412(8)  | 8084(3)  | 148(4) |
| C(17A) | 10800(6)  | 2600(7)  | 7854(3)  | 99(4)  |
| O(16B) | 11561(12) | 1796(15) | 7849(8)  | 152(7) |
| C(17B) | 10722(14) | 1930(7)  | 7565(8)  | 121(6) |
| C(180) | 10754(4)  | 2716(6)  | 7339(2)  | 141(3) |
| C(190) | 11522(4)  | 2637(6)  | 7236(2)  | 153(3) |
| C(200) | 12086(4)  | 2661(4)  | 7730(2)  | 106(2) |

---

**Bond lengths [Å] and angles [°] for [LFeSC<sub>6</sub>H<sub>4</sub>Ar(THF)]K (5·THF).**

---

|               |            |
|---------------|------------|
| Fe(1)-O(10)   | 2.061(3)   |
| Fe(1)-S(11)   | 2.3029(14) |
| Fe(1)-S(21)   | 2.3174(12) |
| Fe(1)-S(31)   | 2.3671(12) |
| S(11)-C(11)   | 1.762(4)   |
| S(21)-C(12)   | 1.754(4)   |
| S(21)-K(1)    | 3.1611(15) |
| S(31)-C(14)   | 1.759(4)   |
| S(31)-K(1)    | 3.1063(14) |
| C(11)-C(61)   | 1.413(5)   |
| C(11)-C(21)   | 1.419(5)   |
| C(21)-C(31)   | 1.379(5)   |
| C(21)-C(23)   | 1.490(5)   |
| C(31)-F(71)   | 1.368(4)   |
| C(31)-C(41)   | 1.376(6)   |
| C(41)-C(51)   | 1.377(5)   |
| C(41)-H(41)   | 0.9500     |
| C(51)-C(61)   | 1.388(5)   |
| C(51)-H(51)   | 0.9500     |
| C(61)-C(81)   | 1.513(6)   |
| C(81)-C(91)   | 1.398(5)   |
| C(81)-C(131)  | 1.402(5)   |
| C(91)-C(101)  | 1.399(6)   |
| C(91)-C(141)  | 1.512(5)   |
| C(101)-C(111) | 1.375(6)   |
| C(101)-H(101) | 0.9500     |
| C(111)-C(121) | 1.399(6)   |
| C(111)-C(171) | 1.523(6)   |
| C(121)-C(131) | 1.404(6)   |
| C(121)-H(121) | 0.9500     |
| C(131)-C(201) | 1.508(6)   |
| C(141)-C(161) | 1.528(6)   |
| C(141)-C(151) | 1.538(6)   |
| C(141)-H(141) | 1.0000     |
| C(151)-H(15A) | 0.9800     |
| C(151)-H(15B) | 0.9800     |
| C(151)-H(15C) | 0.9800     |
| C(161)-H(16A) | 0.9800     |
| C(161)-H(16B) | 0.9800     |
| C(161)-H(16C) | 0.9800     |
| C(171)-C(191) | 1.489(6)   |
| C(171)-C(181) | 1.526(6)   |
| C(171)-H(171) | 1.0000     |
| C(181)-H(18A) | 0.9800     |
| C(181)-H(18B) | 0.9800     |
| C(181)-H(18C) | 0.9800     |
| C(191)-H(19A) | 0.9800     |
| C(191)-H(19B) | 0.9800     |
| C(191)-H(19C) | 0.9800     |
| C(201)-C(221) | 1.503(6)   |
| C(201)-C(211) | 1.531(6)   |
| C(201)-H(201) | 1.0000     |
| C(211)-H(21A) | 0.9800     |
| C(211)-H(21B) | 0.9800     |



|               |          |
|---------------|----------|
| C(211)-H(21C) | 0.9800   |
| C(221)-H(22A) | 0.9800   |
| C(221)-H(22B) | 0.9800   |
| C(221)-H(22C) | 0.9800   |
| C(12)-C(22)   | 1.416(5) |
| C(12)-C(62)   | 1.418(5) |
| C(22)-C(32)   | 1.388(5) |
| C(22)-C(63)   | 1.477(6) |
| C(32)-C(42)   | 1.361(6) |
| C(32)-F(72)   | 1.374(5) |
| C(42)-C(52)   | 1.383(5) |
| C(42)-H(42)   | 0.9500   |
| C(52)-C(62)   | 1.389(5) |
| C(52)-H(52)   | 0.9500   |
| C(62)-C(82)   | 1.503(6) |
| C(82)-C(92)   | 1.395(6) |
| C(82)-C(132)  | 1.401(6) |
| C(92)-C(102)  | 1.408(6) |
| C(92)-C(142)  | 1.522(6) |
| C(92)-K(1)    | 3.467(4) |
| C(102)-C(112) | 1.383(6) |
| C(102)-K(1)   | 3.307(4) |
| C(102)-H(102) | 0.9500   |
| C(112)-C(122) | 1.387(6) |
| C(112)-C(172) | 1.523(6) |
| C(112)-K(1)   | 3.384(4) |
| C(122)-C(132) | 1.402(5) |
| C(122)-H(122) | 0.9500   |
| C(132)-C(202) | 1.514(6) |
| C(142)-C(162) | 1.516(6) |
| C(142)-C(152) | 1.544(6) |
| C(142)-H(142) | 1.0000   |
| C(152)-H(15D) | 0.9800   |
| C(152)-H(15E) | 0.9800   |
| C(152)-H(15F) | 0.9800   |
| C(162)-H(16D) | 0.9800   |
| C(162)-H(16E) | 0.9800   |
| C(162)-H(16F) | 0.9800   |
| C(172)-C(182) | 1.511(6) |
| C(172)-C(192) | 1.526(6) |
| C(172)-H(172) | 1.0000   |
| C(182)-H(18D) | 0.9800   |
| C(182)-H(18E) | 0.9800   |
| C(182)-H(18F) | 0.9800   |
| C(192)-H(19D) | 0.9800   |
| C(192)-H(19E) | 0.9800   |
| C(192)-H(19F) | 0.9800   |
| C(202)-C(222) | 1.530(6) |
| C(202)-C(212) | 1.533(6) |
| C(202)-H(202) | 1.0000   |
| C(212)-H(21D) | 0.9800   |
| C(212)-H(21E) | 0.9800   |
| C(212)-H(21F) | 0.9800   |
| C(222)-H(22D) | 0.9800   |
| C(222)-H(22E) | 0.9800   |
| C(222)-H(22F) | 0.9800   |

|               |          |
|---------------|----------|
| C(13)-C(23)   | 1.392(5) |
| C(13)-C(63)   | 1.398(5) |
| C(13)-H(13)   | 0.9500   |
| C(23)-C(33)   | 1.397(5) |
| C(33)-C(43)   | 1.377(5) |
| C(33)-H(33)   | 0.9500   |
| C(43)-C(53)   | 1.397(6) |
| C(43)-H(43)   | 0.9500   |
| C(53)-C(63)   | 1.398(5) |
| C(53)-H(53)   | 0.9500   |
| C(14)-C(24)   | 1.408(5) |
| C(14)-C(64)   | 1.418(5) |
| C(24)-C(34)   | 1.375(5) |
| C(24)-H(24)   | 0.9500   |
| C(34)-C(44)   | 1.393(6) |
| C(34)-H(34)   | 0.9500   |
| C(44)-C(54)   | 1.375(5) |
| C(44)-H(44)   | 0.9500   |
| C(54)-C(64)   | 1.396(5) |
| C(54)-H(54)   | 0.9500   |
| C(64)-C(74)   | 1.491(5) |
| C(74)-C(124)  | 1.404(6) |
| C(74)-C(84)   | 1.410(5) |
| C(84)-C(94)   | 1.393(6) |
| C(84)-C(134)  | 1.510(6) |
| C(94)-C(104)  | 1.366(6) |
| C(94)-H(94)   | 0.9500   |
| C(104)-C(114) | 1.402(6) |
| C(104)-C(164) | 1.508(6) |
| C(114)-C(124) | 1.387(5) |
| C(114)-H(114) | 0.9500   |
| C(124)-C(194) | 1.528(6) |
| C(134)-C(144) | 1.505(6) |
| C(134)-C(154) | 1.523(6) |
| C(134)-H(134) | 1.0000   |
| C(144)-H(14A) | 0.9800   |
| C(144)-H(14B) | 0.9800   |
| C(144)-H(14C) | 0.9800   |
| C(154)-H(15G) | 0.9800   |
| C(154)-H(15H) | 0.9800   |
| C(154)-H(15I) | 0.9800   |
| C(164)-C(184) | 1.507(6) |
| C(164)-C(174) | 1.520(6) |
| C(164)-H(164) | 1.0000   |
| C(174)-H(17A) | 0.9800   |
| C(174)-H(17B) | 0.9800   |
| C(174)-H(17C) | 0.9800   |
| C(184)-H(18G) | 0.9800   |
| C(184)-H(18H) | 0.9800   |
| C(184)-H(18I) | 0.9800   |
| C(194)-C(204) | 1.519(6) |
| C(194)-C(214) | 1.529(6) |
| C(194)-H(194) | 1.0000   |
| C(204)-H(20A) | 0.9800   |
| C(204)-H(20B) | 0.9800   |
| C(204)-H(20C) | 0.9800   |

|               |           |
|---------------|-----------|
| C(214)-H(21G) | 0.9800    |
| C(214)-H(21H) | 0.9800    |
| C(214)-H(21I) | 0.9800    |
| K(1)-O(60)    | 2.696(3)  |
| O(10)-C(50)   | 1.451(5)  |
| O(10)-C(20)   | 1.452(5)  |
| C(20)-C(30B)  | 1.36(3)   |
| C(20)-C(30A)  | 1.542(10) |
| C(20)-H(20D)  | 0.9900    |
| C(20)-H(20E)  | 0.9900    |
| C(20)-H(20F)  | 0.9900    |
| C(20)-H(20G)  | 0.9900    |
| C(30A)-C(40A) | 1.496(12) |
| C(30A)-H(30A) | 0.9900    |
| C(30A)-H(30B) | 0.9900    |
| C(40A)-C(50)  | 1.489(8)  |
| C(40A)-H(40A) | 0.9900    |
| C(40A)-H(40B) | 0.9900    |
| C(30B)-C(40B) | 1.99(4)   |
| C(30B)-H(30C) | 0.9900    |
| C(30B)-H(30D) | 0.9900    |
| C(40B)-C(50)  | 1.59(2)   |
| C(40B)-H(40C) | 0.9900    |
| C(40B)-H(40D) | 0.9900    |
| C(50)-H(50A)  | 0.9900    |
| C(50)-H(50B)  | 0.9900    |
| C(50)-H(50C)  | 0.9900    |
| C(50)-H(50D)  | 0.9900    |
| O(60)-C(70)   | 1.425(5)  |
| O(60)-C(100)  | 1.449(5)  |
| C(70)-C(80)   | 1.521(6)  |
| C(70)-H(70A)  | 0.9900    |
| C(70)-H(70B)  | 0.9900    |
| C(80)-C(90)   | 1.492(6)  |
| C(80)-H(80A)  | 0.9900    |
| C(80)-H(80B)  | 0.9900    |
| C(90)-C(100)  | 1.508(6)  |
| C(90)-H(90A)  | 0.9900    |
| C(90)-H(90B)  | 0.9900    |
| C(100)-H(10A) | 0.9900    |
| C(100)-H(10B) | 0.9900    |
| O(110)-C(120) | 1.396(6)  |
| O(110)-C(150) | 1.401(8)  |
| C(120)-C(130) | 1.456(8)  |
| C(120)-H(12A) | 0.9900    |
| C(120)-H(12B) | 0.9900    |
| C(130)-C(140) | 1.504(8)  |
| C(130)-H(13A) | 0.9900    |
| C(130)-H(13B) | 0.9900    |
| C(140)-C(150) | 1.524(9)  |
| C(140)-H(14D) | 0.9900    |
| C(140)-H(14E) | 0.9900    |
| C(150)-H(15J) | 0.9900    |
| C(150)-H(15K) | 0.9900    |
| O(16A)-C(17A) | 1.405(11) |
| O(16A)-C(200) | 1.530(10) |

|               |          |
|---------------|----------|
| C(17A)-C(180) | 1.454(5) |
| C(17A)-H(17D) | 0.9900   |
| C(17A)-H(17E) | 0.9900   |
| O(16B)-C(17B) | 1.46(3)  |
| O(16B)-C(200) | 1.78(2)  |
| C(17B)-C(180) | 1.452(5) |
| C(17B)-H(17F) | 0.9900   |
| C(17B)-H(17G) | 0.9900   |
| C(180)-C(190) | 1.452(5) |
| C(180)-H(18L) | 0.9900   |
| C(180)-H(18M) | 0.9900   |
| C(180)-H(18J) | 0.9900   |
| C(180)-H(18K) | 0.9900   |
| C(190)-C(200) | 1.454(5) |
| C(190)-H(19G) | 0.9900   |
| C(190)-H(19H) | 0.9900   |
| C(200)-H(20J) | 0.9900   |
| C(200)-H(20K) | 0.9900   |
| C(200)-H(20H) | 0.9900   |
| C(200)-H(20I) | 0.9900   |

|                    |            |
|--------------------|------------|
| O(10)-Fe(1)-S(11)  | 118.70(9)  |
| O(10)-Fe(1)-S(21)  | 115.73(9)  |
| S(11)-Fe(1)-S(21)  | 121.96(5)  |
| O(10)-Fe(1)-S(31)  | 96.83(8)   |
| S(11)-Fe(1)-S(31)  | 106.99(5)  |
| S(21)-Fe(1)-S(31)  | 84.63(4)   |
| C(11)-S(11)-Fe(1)  | 118.95(14) |
| C(12)-S(21)-Fe(1)  | 122.58(15) |
| C(12)-S(21)-K(1)   | 128.80(15) |
| Fe(1)-S(21)-K(1)   | 106.07(4)  |
| C(14)-S(31)-Fe(1)  | 119.55(15) |
| C(14)-S(31)-K(1)   | 131.25(15) |
| Fe(1)-S(31)-K(1)   | 106.46(4)  |
| C(61)-C(11)-C(21)  | 118.5(4)   |
| C(61)-C(11)-S(11)  | 117.1(3)   |
| C(21)-C(11)-S(11)  | 124.5(3)   |
| C(31)-C(21)-C(11)  | 118.0(4)   |
| C(31)-C(21)-C(23)  | 118.2(4)   |
| C(11)-C(21)-C(23)  | 123.7(4)   |
| F(71)-C(31)-C(41)  | 116.9(4)   |
| F(71)-C(31)-C(21)  | 118.9(4)   |
| C(41)-C(31)-C(21)  | 124.2(4)   |
| C(31)-C(41)-C(51)  | 117.3(4)   |
| C(31)-C(41)-H(41)  | 121.4      |
| C(51)-C(41)-H(41)  | 121.4      |
| C(41)-C(51)-C(61)  | 121.9(4)   |
| C(41)-C(51)-H(51)  | 119.1      |
| C(61)-C(51)-H(51)  | 119.1      |
| C(51)-C(61)-C(11)  | 119.9(4)   |
| C(51)-C(61)-C(81)  | 118.1(4)   |
| C(11)-C(61)-C(81)  | 121.9(4)   |
| C(91)-C(81)-C(131) | 121.2(4)   |
| C(91)-C(81)-C(61)  | 120.1(4)   |
| C(131)-C(81)-C(61) | 118.7(4)   |
| C(81)-C(91)-C(101) | 118.4(4)   |

|                      |          |
|----------------------|----------|
| C(81)-C(91)-C(141)   | 121.1(4) |
| C(101)-C(91)-C(141)  | 120.4(4) |
| C(111)-C(101)-C(91)  | 122.5(4) |
| C(111)-C(101)-H(101) | 118.8    |
| C(91)-C(101)-H(101)  | 118.8    |
| C(101)-C(111)-C(121) | 117.9(4) |
| C(101)-C(111)-C(171) | 121.1(4) |
| C(121)-C(111)-C(171) | 121.0(4) |
| C(111)-C(121)-C(131) | 122.2(4) |
| C(111)-C(121)-H(121) | 118.9    |
| C(131)-C(121)-H(121) | 118.9    |
| C(81)-C(131)-C(121)  | 117.8(4) |
| C(81)-C(131)-C(201)  | 122.1(4) |
| C(121)-C(131)-C(201) | 120.1(4) |
| C(91)-C(141)-C(161)  | 113.1(3) |
| C(91)-C(141)-C(151)  | 108.9(3) |
| C(161)-C(141)-C(151) | 110.4(3) |
| C(91)-C(141)-H(141)  | 108.1    |
| C(161)-C(141)-H(141) | 108.1    |
| C(151)-C(141)-H(141) | 108.1    |
| C(141)-C(151)-H(15A) | 109.5    |
| C(141)-C(151)-H(15B) | 109.5    |
| H(15A)-C(151)-H(15B) | 109.5    |
| C(141)-C(151)-H(15C) | 109.5    |
| H(15A)-C(151)-H(15C) | 109.5    |
| H(15B)-C(151)-H(15C) | 109.5    |
| C(141)-C(161)-H(16A) | 109.5    |
| C(141)-C(161)-H(16B) | 109.5    |
| H(16A)-C(161)-H(16B) | 109.5    |
| C(141)-C(161)-H(16C) | 109.5    |
| H(16A)-C(161)-H(16C) | 109.5    |
| H(16B)-C(161)-H(16C) | 109.5    |
| C(191)-C(171)-C(111) | 113.5(4) |
| C(191)-C(171)-C(181) | 111.9(4) |
| C(111)-C(171)-C(181) | 111.2(4) |
| C(191)-C(171)-H(171) | 106.6    |
| C(111)-C(171)-H(171) | 106.6    |
| C(181)-C(171)-H(171) | 106.6    |
| C(171)-C(181)-H(18A) | 109.5    |
| C(171)-C(181)-H(18B) | 109.5    |
| H(18A)-C(181)-H(18B) | 109.5    |
| C(171)-C(181)-H(18C) | 109.5    |
| H(18A)-C(181)-H(18C) | 109.5    |
| H(18B)-C(181)-H(18C) | 109.5    |
| C(171)-C(191)-H(19A) | 109.5    |
| C(171)-C(191)-H(19B) | 109.5    |
| H(19A)-C(191)-H(19B) | 109.5    |
| C(171)-C(191)-H(19C) | 109.5    |
| H(19A)-C(191)-H(19C) | 109.5    |
| H(19B)-C(191)-H(19C) | 109.5    |
| C(221)-C(201)-C(131) | 112.6(4) |
| C(221)-C(201)-C(211) | 109.7(4) |
| C(131)-C(201)-C(211) | 113.1(4) |
| C(221)-C(201)-H(201) | 107.0    |
| C(131)-C(201)-H(201) | 107.0    |
| C(211)-C(201)-H(201) | 107.0    |

|                      |          |
|----------------------|----------|
| C(201)-C(211)-H(21A) | 109.5    |
| C(201)-C(211)-H(21B) | 109.5    |
| H(21A)-C(211)-H(21B) | 109.5    |
| C(201)-C(211)-H(21C) | 109.5    |
| H(21A)-C(211)-H(21C) | 109.5    |
| H(21B)-C(211)-H(21C) | 109.5    |
| C(201)-C(221)-H(22A) | 109.5    |
| C(201)-C(221)-H(22B) | 109.5    |
| H(22A)-C(221)-H(22B) | 109.5    |
| C(201)-C(221)-H(22C) | 109.5    |
| H(22A)-C(221)-H(22C) | 109.5    |
| H(22B)-C(221)-H(22C) | 109.5    |
| C(22)-C(12)-C(62)    | 119.4(4) |
| C(22)-C(12)-S(21)    | 123.3(3) |
| C(62)-C(12)-S(21)    | 117.2(3) |
| C(32)-C(22)-C(12)    | 116.8(4) |
| C(32)-C(22)-C(63)    | 119.6(4) |
| C(12)-C(22)-C(63)    | 123.6(4) |
| C(42)-C(32)-F(72)    | 117.4(4) |
| C(42)-C(32)-C(22)    | 125.5(4) |
| F(72)-C(32)-C(22)    | 117.0(4) |
| C(32)-C(42)-C(52)    | 116.8(4) |
| C(32)-C(42)-H(42)    | 121.6    |
| C(52)-C(42)-H(42)    | 121.6    |
| C(42)-C(52)-C(62)    | 122.3(4) |
| C(42)-C(52)-H(52)    | 118.8    |
| C(62)-C(52)-H(52)    | 118.8    |
| C(52)-C(62)-C(12)    | 119.2(4) |
| C(52)-C(62)-C(82)    | 119.7(4) |
| C(12)-C(62)-C(82)    | 121.1(4) |
| C(92)-C(82)-C(132)   | 120.6(4) |
| C(92)-C(82)-C(62)    | 120.3(4) |
| C(132)-C(82)-C(62)   | 119.1(4) |
| C(82)-C(92)-C(102)   | 118.3(4) |
| C(82)-C(92)-C(142)   | 122.3(4) |
| C(102)-C(92)-C(142)  | 119.4(4) |
| C(82)-C(92)-K(1)     | 86.5(2)  |
| C(102)-C(92)-K(1)    | 71.7(2)  |
| C(142)-C(92)-K(1)    | 109.4(2) |
| C(112)-C(102)-C(92)  | 122.8(4) |
| C(112)-C(102)-K(1)   | 81.2(2)  |
| C(92)-C(102)-K(1)    | 84.4(2)  |
| C(112)-C(102)-H(102) | 118.6    |
| C(92)-C(102)-H(102)  | 118.6    |
| K(1)-C(102)-H(102)   | 105.1    |
| C(102)-C(112)-C(122) | 117.3(4) |
| C(102)-C(112)-C(172) | 119.9(4) |
| C(122)-C(112)-C(172) | 122.9(4) |
| C(102)-C(112)-K(1)   | 75.0(2)  |
| C(122)-C(112)-K(1)   | 86.0(2)  |
| C(172)-C(112)-K(1)   | 109.6(3) |
| C(112)-C(122)-C(132) | 122.6(4) |
| C(112)-C(122)-H(122) | 118.7    |
| C(132)-C(122)-H(122) | 118.7    |
| C(82)-C(132)-C(122)  | 118.5(4) |
| C(82)-C(132)-C(202)  | 121.1(4) |

|                      |          |
|----------------------|----------|
| C(122)-C(132)-C(202) | 120.4(4) |
| C(162)-C(142)-C(92)  | 114.1(4) |
| C(162)-C(142)-C(152) | 109.8(4) |
| C(92)-C(142)-C(152)  | 110.0(4) |
| C(162)-C(142)-H(142) | 107.6    |
| C(92)-C(142)-H(142)  | 107.6    |
| C(152)-C(142)-H(142) | 107.6    |
| C(142)-C(152)-H(15D) | 109.5    |
| C(142)-C(152)-H(15E) | 109.5    |
| H(15D)-C(152)-H(15E) | 109.5    |
| C(142)-C(152)-H(15F) | 109.5    |
| H(15D)-C(152)-H(15F) | 109.5    |
| H(15E)-C(152)-H(15F) | 109.5    |
| C(142)-C(162)-H(16D) | 109.5    |
| C(142)-C(162)-H(16E) | 109.5    |
| H(16D)-C(162)-H(16E) | 109.5    |
| C(142)-C(162)-H(16F) | 109.5    |
| H(16D)-C(162)-H(16F) | 109.5    |
| H(16E)-C(162)-H(16F) | 109.5    |
| C(182)-C(172)-C(112) | 111.6(4) |
| C(182)-C(172)-C(192) | 110.3(4) |
| C(112)-C(172)-C(192) | 114.1(4) |
| C(182)-C(172)-H(172) | 106.8    |
| C(112)-C(172)-H(172) | 106.8    |
| C(192)-C(172)-H(172) | 106.8    |
| C(172)-C(182)-H(18D) | 109.5    |
| C(172)-C(182)-H(18E) | 109.5    |
| H(18D)-C(182)-H(18E) | 109.5    |
| C(172)-C(182)-H(18F) | 109.5    |
| H(18D)-C(182)-H(18F) | 109.5    |
| H(18E)-C(182)-H(18F) | 109.5    |
| C(172)-C(192)-H(19D) | 109.5    |
| C(172)-C(192)-H(19E) | 109.5    |
| H(19D)-C(192)-H(19E) | 109.5    |
| C(172)-C(192)-H(19F) | 109.5    |
| H(19D)-C(192)-H(19F) | 109.5    |
| H(19E)-C(192)-H(19F) | 109.5    |
| C(132)-C(202)-C(222) | 113.4(4) |
| C(132)-C(202)-C(212) | 110.5(4) |
| C(222)-C(202)-C(212) | 111.1(4) |
| C(132)-C(202)-H(202) | 107.2    |
| C(222)-C(202)-H(202) | 107.2    |
| C(212)-C(202)-H(202) | 107.2    |
| C(202)-C(212)-H(21D) | 109.5    |
| C(202)-C(212)-H(21E) | 109.5    |
| H(21D)-C(212)-H(21E) | 109.5    |
| C(202)-C(212)-H(21F) | 109.5    |
| H(21D)-C(212)-H(21F) | 109.5    |
| H(21E)-C(212)-H(21F) | 109.5    |
| C(202)-C(222)-H(22D) | 109.5    |
| C(202)-C(222)-H(22E) | 109.5    |
| H(22D)-C(222)-H(22E) | 109.5    |
| C(202)-C(222)-H(22F) | 109.5    |
| H(22D)-C(222)-H(22F) | 109.5    |
| H(22E)-C(222)-H(22F) | 109.5    |
| C(23)-C(13)-C(63)    | 122.0(4) |

|                      |          |
|----------------------|----------|
| C(23)-C(13)-H(13)    | 119.0    |
| C(63)-C(13)-H(13)    | 119.0    |
| C(13)-C(23)-C(33)    | 118.2(4) |
| C(13)-C(23)-C(21)    | 119.4(4) |
| C(33)-C(23)-C(21)    | 122.1(4) |
| C(43)-C(33)-C(23)    | 121.0(4) |
| C(43)-C(33)-H(33)    | 119.5    |
| C(23)-C(33)-H(33)    | 119.5    |
| C(33)-C(43)-C(53)    | 120.3(4) |
| C(33)-C(43)-H(43)    | 119.9    |
| C(53)-C(43)-H(43)    | 119.9    |
| C(43)-C(53)-C(63)    | 120.2(4) |
| C(43)-C(53)-H(53)    | 119.9    |
| C(63)-C(53)-H(53)    | 119.9    |
| C(53)-C(63)-C(13)    | 118.4(4) |
| C(53)-C(63)-C(22)    | 119.9(4) |
| C(13)-C(63)-C(22)    | 121.6(4) |
| C(24)-C(14)-C(64)    | 118.8(4) |
| C(24)-C(14)-S(31)    | 121.9(3) |
| C(64)-C(14)-S(31)    | 119.3(3) |
| C(34)-C(24)-C(14)    | 121.1(4) |
| C(34)-C(24)-H(24)    | 119.5    |
| C(14)-C(24)-H(24)    | 119.5    |
| C(24)-C(34)-C(44)    | 120.0(4) |
| C(24)-C(34)-H(34)    | 120.0    |
| C(44)-C(34)-H(34)    | 120.0    |
| C(54)-C(44)-C(34)    | 119.8(4) |
| C(54)-C(44)-H(44)    | 120.1    |
| C(34)-C(44)-H(44)    | 120.1    |
| C(44)-C(54)-C(64)    | 121.7(4) |
| C(44)-C(54)-H(54)    | 119.1    |
| C(64)-C(54)-H(54)    | 119.1    |
| C(54)-C(64)-C(14)    | 118.6(4) |
| C(54)-C(64)-C(74)    | 121.0(4) |
| C(14)-C(64)-C(74)    | 120.4(4) |
| C(124)-C(74)-C(84)   | 119.9(4) |
| C(124)-C(74)-C(64)   | 119.3(4) |
| C(84)-C(74)-C(64)    | 120.8(4) |
| C(94)-C(84)-C(74)    | 118.0(4) |
| C(94)-C(84)-C(134)   | 120.0(4) |
| C(74)-C(84)-C(134)   | 122.0(4) |
| C(104)-C(94)-C(84)   | 123.9(4) |
| C(104)-C(94)-H(94)   | 118.1    |
| C(84)-C(94)-H(94)    | 118.1    |
| C(94)-C(104)-C(114)  | 116.9(4) |
| C(94)-C(104)-C(164)  | 121.5(4) |
| C(114)-C(104)-C(164) | 121.6(4) |
| C(124)-C(114)-C(104) | 122.4(4) |
| C(124)-C(114)-H(114) | 118.8    |
| C(104)-C(114)-H(114) | 118.8    |
| C(114)-C(124)-C(74)  | 119.0(4) |
| C(114)-C(124)-C(194) | 120.2(4) |
| C(74)-C(124)-C(194)  | 120.8(4) |
| C(144)-C(134)-C(84)  | 109.8(4) |
| C(144)-C(134)-C(154) | 108.2(4) |
| C(84)-C(134)-C(154)  | 113.3(4) |



|                      |            |
|----------------------|------------|
| C(144)-C(134)-H(134) | 108.5      |
| C(84)-C(134)-H(134)  | 108.5      |
| C(154)-C(134)-H(134) | 108.5      |
| C(134)-C(144)-H(14A) | 109.5      |
| C(134)-C(144)-H(14B) | 109.5      |
| H(14A)-C(144)-H(14B) | 109.5      |
| C(134)-C(144)-H(14C) | 109.5      |
| H(14A)-C(144)-H(14C) | 109.5      |
| H(14B)-C(144)-H(14C) | 109.5      |
| C(134)-C(154)-H(15G) | 109.5      |
| C(134)-C(154)-H(15H) | 109.5      |
| H(15G)-C(154)-H(15H) | 109.5      |
| C(134)-C(154)-H(15I) | 109.5      |
| H(15G)-C(154)-H(15I) | 109.5      |
| H(15H)-C(154)-H(15I) | 109.5      |
| C(184)-C(164)-C(104) | 113.6(4)   |
| C(184)-C(164)-C(174) | 110.1(4)   |
| C(104)-C(164)-C(174) | 110.3(4)   |
| C(184)-C(164)-H(164) | 107.5      |
| C(104)-C(164)-H(164) | 107.5      |
| C(174)-C(164)-H(164) | 107.5      |
| C(164)-C(174)-H(17A) | 109.5      |
| C(164)-C(174)-H(17B) | 109.5      |
| H(17A)-C(174)-H(17B) | 109.5      |
| C(164)-C(174)-H(17C) | 109.5      |
| H(17A)-C(174)-H(17C) | 109.5      |
| H(17B)-C(174)-H(17C) | 109.5      |
| C(164)-C(184)-H(18G) | 109.5      |
| C(164)-C(184)-H(18H) | 109.5      |
| H(18G)-C(184)-H(18H) | 109.5      |
| C(164)-C(184)-H(18I) | 109.5      |
| H(18G)-C(184)-H(18I) | 109.5      |
| H(18H)-C(184)-H(18I) | 109.5      |
| C(204)-C(194)-C(124) | 113.9(4)   |
| C(204)-C(194)-C(214) | 110.4(4)   |
| C(124)-C(194)-C(214) | 110.0(4)   |
| C(204)-C(194)-H(194) | 107.4      |
| C(124)-C(194)-H(194) | 107.4      |
| C(214)-C(194)-H(194) | 107.4      |
| C(194)-C(204)-H(20A) | 109.5      |
| C(194)-C(204)-H(20B) | 109.5      |
| H(20A)-C(204)-H(20B) | 109.5      |
| C(194)-C(204)-H(20C) | 109.5      |
| H(20A)-C(204)-H(20C) | 109.5      |
| H(20B)-C(204)-H(20C) | 109.5      |
| C(194)-C(214)-H(21G) | 109.5      |
| C(194)-C(214)-H(21H) | 109.5      |
| H(21G)-C(214)-H(21H) | 109.5      |
| C(194)-C(214)-H(21I) | 109.5      |
| H(21G)-C(214)-H(21I) | 109.5      |
| H(21H)-C(214)-H(21I) | 109.5      |
| O(60)-K(1)-S(31)     | 89.38(7)   |
| O(60)-K(1)-S(21)     | 85.77(7)   |
| S(31)-K(1)-S(21)     | 60.42(3)   |
| O(60)-K(1)-C(102)    | 117.32(10) |
| S(31)-K(1)-C(102)    | 139.32(9)  |

|                      |           |
|----------------------|-----------|
| S(21)-K(1)-C(102)    | 89.83(8)  |
| O(60)-K(1)-C(112)    | 95.48(10) |
| S(31)-K(1)-C(112)    | 157.51(8) |
| S(21)-K(1)-C(112)    | 97.98(8)  |
| C(102)-K(1)-C(112)   | 23.82(10) |
| C(50)-O(10)-C(20)    | 107.4(3)  |
| C(50)-O(10)-Fe(1)    | 119.3(2)  |
| C(20)-O(10)-Fe(1)    | 123.1(2)  |
| C(30B)-C(20)-O(10)   | 112.9(15) |
| O(10)-C(20)-C(30A)   | 104.3(5)  |
| O(10)-C(20)-H(20D)   | 110.9     |
| C(30A)-C(20)-H(20D)  | 110.9     |
| O(10)-C(20)-H(20E)   | 110.9     |
| C(30A)-C(20)-H(20E)  | 110.9     |
| H(20D)-C(20)-H(20E)  | 108.9     |
| C(30B)-C(20)-H(20F)  | 109.0     |
| O(10)-C(20)-H(20F)   | 109.0     |
| C(30B)-C(20)-H(20G)  | 109.0     |
| O(10)-C(20)-H(20G)   | 109.0     |
| H(20F)-C(20)-H(20G)  | 107.8     |
| C(40A)-C(30A)-C(20)  | 105.9(7)  |
| C(40A)-C(30A)-H(30A) | 110.6     |
| C(20)-C(30A)-H(30A)  | 110.6     |
| C(40A)-C(30A)-H(30B) | 110.6     |
| C(20)-C(30A)-H(30B)  | 110.6     |
| H(30A)-C(30A)-H(30B) | 108.7     |
| C(50)-C(40A)-C(30A)  | 99.6(6)   |
| C(50)-C(40A)-H(40A)  | 111.9     |
| C(30A)-C(40A)-H(40A) | 111.9     |
| C(50)-C(40A)-H(40B)  | 111.9     |
| C(30A)-C(40A)-H(40B) | 111.9     |
| H(40A)-C(40A)-H(40B) | 109.6     |
| C(20)-C(30B)-C(40B)  | 84.1(18)  |
| C(20)-C(30B)-H(30C)  | 114.6     |
| C(40B)-C(30B)-H(30C) | 114.6     |
| C(20)-C(30B)-H(30D)  | 114.6     |
| C(40B)-C(30B)-H(30D) | 114.6     |
| H(30C)-C(30B)-H(30D) | 111.7     |
| C(50)-C(40B)-C(30B)  | 90.9(16)  |
| C(50)-C(40B)-H(40C)  | 113.5     |
| C(30B)-C(40B)-H(40C) | 113.5     |
| C(50)-C(40B)-H(40D)  | 113.5     |
| C(30B)-C(40B)-H(40D) | 113.5     |
| H(40C)-C(40B)-H(40D) | 110.8     |
| O(10)-C(50)-C(40A)   | 105.9(4)  |
| O(10)-C(50)-C(40B)   | 103.7(10) |
| O(10)-C(50)-H(50A)   | 110.6     |
| C(40A)-C(50)-H(50A)  | 110.6     |
| O(10)-C(50)-H(50B)   | 110.6     |
| C(40A)-C(50)-H(50B)  | 110.6     |
| H(50A)-C(50)-H(50B)  | 108.7     |
| O(10)-C(50)-H(50C)   | 111.0     |
| C(40B)-C(50)-H(50C)  | 111.0     |
| O(10)-C(50)-H(50D)   | 111.0     |
| C(40B)-C(50)-H(50D)  | 111.0     |
| H(50C)-C(50)-H(50D)  | 109.0     |

|                      |           |
|----------------------|-----------|
| C(70)-O(60)-C(100)   | 109.5(3)  |
| C(70)-O(60)-K(1)     | 136.8(3)  |
| C(100)-O(60)-K(1)    | 112.4(2)  |
| O(60)-C(70)-C(80)    | 105.6(4)  |
| O(60)-C(70)-H(70A)   | 110.6     |
| C(80)-C(70)-H(70A)   | 110.6     |
| O(60)-C(70)-H(70B)   | 110.6     |
| C(80)-C(70)-H(70B)   | 110.6     |
| H(70A)-C(70)-H(70B)  | 108.8     |
| C(90)-C(80)-C(70)    | 102.8(4)  |
| C(90)-C(80)-H(80A)   | 111.2     |
| C(70)-C(80)-H(80A)   | 111.2     |
| C(90)-C(80)-H(80B)   | 111.2     |
| C(70)-C(80)-H(80B)   | 111.2     |
| H(80A)-C(80)-H(80B)  | 109.1     |
| C(80)-C(90)-C(100)   | 102.2(4)  |
| C(80)-C(90)-H(90A)   | 111.3     |
| C(100)-C(90)-H(90A)  | 111.3     |
| C(80)-C(90)-H(90B)   | 111.3     |
| C(100)-C(90)-H(90B)  | 111.3     |
| H(90A)-C(90)-H(90B)  | 109.2     |
| O(60)-C(100)-C(90)   | 105.6(4)  |
| O(60)-C(100)-K(1)    | 45.17(17) |
| C(90)-C(100)-K(1)    | 144.7(3)  |
| O(60)-C(100)-H(10A)  | 110.6     |
| C(90)-C(100)-H(10A)  | 110.6     |
| K(1)-C(100)-H(10A)   | 73.5      |
| O(60)-C(100)-H(10B)  | 110.6     |
| C(90)-C(100)-H(10B)  | 110.6     |
| K(1)-C(100)-H(10B)   | 100.2     |
| H(10A)-C(100)-H(10B) | 108.8     |
| C(120)-O(110)-C(150) | 109.6(5)  |
| O(110)-C(120)-C(130) | 104.5(5)  |
| O(110)-C(120)-H(12A) | 110.9     |
| C(130)-C(120)-H(12A) | 110.9     |
| O(110)-C(120)-H(12B) | 110.9     |
| C(130)-C(120)-H(12B) | 110.9     |
| H(12A)-C(120)-H(12B) | 108.9     |
| C(120)-C(130)-C(140) | 104.2(6)  |
| C(120)-C(130)-H(13A) | 110.9     |
| C(140)-C(130)-H(13A) | 110.9     |
| C(120)-C(130)-H(13B) | 110.9     |
| C(140)-C(130)-H(13B) | 110.9     |
| H(13A)-C(130)-H(13B) | 108.9     |
| C(130)-C(140)-C(150) | 97.7(5)   |
| C(130)-C(140)-H(14D) | 112.2     |
| C(150)-C(140)-H(14D) | 112.2     |
| C(130)-C(140)-H(14E) | 112.2     |
| C(150)-C(140)-H(14E) | 112.2     |
| H(14D)-C(140)-H(14E) | 109.8     |
| O(110)-C(150)-C(140) | 107.5(6)  |
| O(110)-C(150)-H(15J) | 110.2     |
| C(140)-C(150)-H(15J) | 110.2     |
| O(110)-C(150)-H(15K) | 110.2     |
| C(140)-C(150)-H(15K) | 110.2     |
| H(15J)-C(150)-H(15K) | 108.5     |

|                      |           |
|----------------------|-----------|
| C(17A)-O(16A)-C(200) | 107.2(7)  |
| O(16A)-C(17A)-C(180) | 104.4(7)  |
| O(16A)-C(17A)-H(17D) | 110.9     |
| C(180)-C(17A)-H(17D) | 110.9     |
| O(16A)-C(17A)-H(17E) | 110.9     |
| C(180)-C(17A)-H(17E) | 110.9     |
| H(17D)-C(17A)-H(17E) | 108.9     |
| C(17B)-O(16B)-C(200) | 105.0(13) |
| C(180)-C(17B)-O(16B) | 102.6(15) |
| C(180)-C(17B)-H(17F) | 111.3     |
| O(16B)-C(17B)-H(17F) | 111.3     |
| C(180)-C(17B)-H(17G) | 111.3     |
| O(16B)-C(17B)-H(17G) | 111.3     |
| H(17F)-C(17B)-H(17G) | 109.2     |
| C(17B)-C(180)-C(190) | 99.5(11)  |
| C(190)-C(180)-C(17A) | 114.0(6)  |
| C(17B)-C(180)-H(18L) | 111.9     |
| C(190)-C(180)-H(18L) | 111.9     |
| C(17B)-C(180)-H(18M) | 111.9     |
| C(190)-C(180)-H(18M) | 111.9     |
| H(18L)-C(180)-H(18M) | 109.6     |
| C(190)-C(180)-H(18J) | 108.8     |
| C(17A)-C(180)-H(18J) | 108.8     |
| C(190)-C(180)-H(18K) | 108.8     |
| C(17A)-C(180)-H(18K) | 108.8     |
| H(18J)-C(180)-H(18K) | 107.6     |
| C(180)-C(190)-C(200) | 101.8(6)  |
| C(180)-C(190)-H(19G) | 111.4     |
| C(200)-C(190)-H(19G) | 111.4     |
| C(180)-C(190)-H(19H) | 111.4     |
| C(200)-C(190)-H(19H) | 111.4     |
| H(19G)-C(190)-H(19H) | 109.3     |
| C(190)-C(200)-O(16A) | 106.6(6)  |
| C(190)-C(200)-O(16B) | 85.6(8)   |
| C(190)-C(200)-H(20J) | 114.4     |
| O(16B)-C(200)-H(20J) | 114.4     |
| C(190)-C(200)-H(20K) | 114.4     |
| O(16B)-C(200)-H(20K) | 114.4     |
| H(20J)-C(200)-H(20K) | 111.5     |
| C(190)-C(200)-H(20H) | 110.4     |
| O(16A)-C(200)-H(20H) | 110.4     |
| C(190)-C(200)-H(20I) | 110.4     |
| O(16A)-C(200)-H(20I) | 110.4     |
| H(20H)-C(200)-H(20I) | 108.6     |

---

Symmetry transformations used to generate equivalent atoms:

**Anisotropic displacement parameters ( $\text{\AA}^2 \times 10^3$ ) for [LFeSC<sub>6</sub>H<sub>4</sub>Ar(THF)]K (5·THF). The anisotropic displacement factor exponent takes the form:  $-2\pi^2 [h^2 a^{*2} U^{11} + \dots + 2 h k a^* b^* U^{12}]$**

|        | U <sup>11</sup> | U <sup>22</sup> | U <sup>33</sup> | U <sup>23</sup> | U <sup>13</sup> | U <sup>12</sup> |
|--------|-----------------|-----------------|-----------------|-----------------|-----------------|-----------------|
| Fe(1)  | 44(1)           | 39(1)           | 39(1)           | -1(1)           | 13(1)           | 0(1)            |
| S(11)  | 43(1)           | 53(1)           | 39(1)           | 5(1)            | 12(1)           | 2(1)            |
| S(21)  | 79(1)           | 43(1)           | 36(1)           | 1(1)            | 13(1)           | 15(1)           |
| S(31)  | 56(1)           | 40(1)           | 43(1)           | 0(1)            | 18(1)           | 2(1)            |
| C(11)  | 38(3)           | 41(3)           | 34(3)           | -3(2)           | 8(2)            | -2(2)           |
| C(21)  | 38(3)           | 37(2)           | 37(3)           | -2(2)           | 13(2)           | -2(2)           |
| C(31)  | 46(3)           | 42(3)           | 29(3)           | 0(2)            | 1(2)            | 2(2)            |
| C(41)  | 51(3)           | 45(3)           | 34(3)           | -1(2)           | 16(2)           | -2(2)           |
| C(51)  | 45(3)           | 41(3)           | 37(3)           | -2(2)           | 9(2)            | -3(2)           |
| C(61)  | 43(3)           | 37(2)           | 37(3)           | -7(2)           | 13(2)           | 0(2)            |
| F(71)  | 50(2)           | 58(2)           | 36(2)           | 5(1)            | 8(1)            | 1(1)            |
| C(81)  | 36(2)           | 46(3)           | 33(3)           | -1(2)           | 12(2)           | -1(2)           |
| C(91)  | 43(3)           | 42(3)           | 43(3)           | 4(2)            | 19(2)           | 2(2)            |
| C(101) | 47(3)           | 49(3)           | 49(3)           | 2(2)            | 14(3)           | 3(2)            |
| C(111) | 47(3)           | 51(3)           | 46(3)           | 4(2)            | 12(2)           | 2(2)            |
| C(121) | 47(3)           | 51(3)           | 49(3)           | -9(2)           | 12(2)           | -9(2)           |
| C(131) | 40(3)           | 49(3)           | 43(3)           | -1(2)           | 13(2)           | 0(2)            |
| C(141) | 51(3)           | 39(3)           | 40(3)           | -3(2)           | 12(2)           | -2(2)           |
| C(151) | 82(4)           | 44(3)           | 61(3)           | -4(2)           | 30(3)           | -2(3)           |
| C(161) | 66(3)           | 54(3)           | 55(3)           | -1(3)           | 15(3)           | -8(3)           |
| C(171) | 54(3)           | 59(3)           | 52(4)           | 9(3)            | 1(3)            | 3(3)            |
| C(181) | 48(3)           | 95(4)           | 65(4)           | 12(3)           | 7(3)            | -4(3)           |
| C(191) | 64(4)           | 87(4)           | 46(3)           | 10(3)           | 1(3)            | -14(3)          |
| C(201) | 54(3)           | 44(3)           | 44(3)           | 0(2)            | 4(2)            | -2(2)           |
| C(211) | 92(4)           | 56(3)           | 94(4)           | 14(3)           | 47(4)           | -1(3)           |
| C(221) | 93(4)           | 56(3)           | 90(4)           | 5(3)            | 47(4)           | 12(3)           |
| C(12)  | 51(3)           | 43(3)           | 32(3)           | 4(2)            | 12(2)           | -2(2)           |
| C(22)  | 42(3)           | 42(3)           | 39(3)           | 0(2)            | 11(2)           | -1(2)           |
| C(32)  | 49(3)           | 47(3)           | 34(3)           | 5(2)            | 8(2)            | 7(2)            |
| C(42)  | 49(3)           | 46(3)           | 42(3)           | 5(2)            | 10(2)           | 12(2)           |
| C(52)  | 45(3)           | 48(3)           | 44(3)           | -7(2)           | 10(2)           | 5(2)            |
| C(62)  | 41(3)           | 37(3)           | 42(3)           | 1(2)            | 9(2)            | 0(2)            |
| F(72)  | 67(2)           | 63(2)           | 39(2)           | 6(1)            | 10(1)           | 18(1)           |
| C(82)  | 51(3)           | 41(3)           | 34(3)           | -2(2)           | 16(2)           | 6(2)            |
| C(92)  | 44(3)           | 41(3)           | 44(3)           | -1(2)           | 13(2)           | 4(2)            |
| C(102) | 51(3)           | 44(3)           | 46(3)           | 0(2)            | 23(3)           | 1(2)            |
| C(112) | 53(3)           | 39(3)           | 37(3)           | -4(2)           | 15(2)           | 1(2)            |
| C(122) | 51(3)           | 39(3)           | 46(3)           | -4(2)           | 14(2)           | -5(2)           |
| C(132) | 48(3)           | 39(3)           | 37(3)           | -4(2)           | 12(2)           | 1(2)            |
| C(142) | 51(3)           | 57(3)           | 45(3)           | 1(2)            | 13(2)           | -3(2)           |
| C(152) | 60(3)           | 70(4)           | 83(4)           | -8(3)           | 1(3)            | -12(3)          |
| C(162) | 52(3)           | 92(4)           | 70(4)           | -8(3)           | 17(3)           | -3(3)           |
| C(172) | 61(3)           | 50(3)           | 47(3)           | 0(2)            | 15(3)           | -10(2)          |
| C(182) | 90(4)           | 88(4)           | 47(3)           | -9(3)           | 23(3)           | 23(3)           |
| C(192) | 74(4)           | 67(3)           | 44(3)           | 5(3)            | 14(3)           | -1(3)           |
| C(202) | 60(3)           | 46(3)           | 37(3)           | -5(2)           | 17(2)           | -7(2)           |
| C(212) | 67(3)           | 52(3)           | 54(3)           | 5(2)            | 19(3)           | -6(2)           |
| C(222) | 50(3)           | 61(3)           | 57(3)           | 0(2)            | 18(3)           | -2(2)           |

|        |         |         |         |        |        |        |
|--------|---------|---------|---------|--------|--------|--------|
| C(13)  | 37(3)   | 43(3)   | 23(2)   | 2(2)   | 4(2)   | -1(2)  |
| C(23)  | 47(3)   | 42(3)   | 24(2)   | 7(2)   | 9(2)   | 0(2)   |
| C(33)  | 42(3)   | 56(3)   | 30(3)   | -4(2)  | 9(2)   | 2(2)   |
| C(43)  | 48(3)   | 53(3)   | 35(3)   | -7(2)  | 9(2)   | -7(2)  |
| C(53)  | 42(3)   | 53(3)   | 41(3)   | 11(2)  | 5(2)   | 4(2)   |
| C(63)  | 43(3)   | 41(3)   | 32(3)   | 3(2)   | 7(2)   | 4(2)   |
| C(14)  | 35(2)   | 42(3)   | 39(3)   | -3(2)  | 7(2)   | -2(2)  |
| C(24)  | 44(3)   | 49(3)   | 37(3)   | -4(2)  | 11(2)  | -3(2)  |
| C(34)  | 45(3)   | 45(3)   | 47(3)   | -8(2)  | 14(2)  | 3(2)   |
| C(44)  | 47(3)   | 38(3)   | 50(3)   | -3(2)  | 6(2)   | 0(2)   |
| C(54)  | 47(3)   | 40(3)   | 43(3)   | -1(2)  | 14(2)  | -2(2)  |
| C(64)  | 36(2)   | 41(3)   | 37(3)   | -4(2)  | 8(2)   | -3(2)  |
| C(74)  | 45(3)   | 35(2)   | 38(3)   | -1(2)  | 14(2)  | -3(2)  |
| C(84)  | 46(3)   | 45(3)   | 38(3)   | -3(2)  | 12(2)  | -6(2)  |
| C(94)  | 52(3)   | 45(3)   | 37(3)   | -4(2)  | 9(2)   | -4(2)  |
| C(104) | 46(3)   | 50(3)   | 41(3)   | -3(2)  | 15(2)  | 0(2)   |
| C(114) | 40(3)   | 57(3)   | 40(3)   | 0(2)   | 9(2)   | -1(2)  |
| C(124) | 43(3)   | 45(3)   | 34(3)   | -3(2)  | 14(2)  | -3(2)  |
| C(134) | 45(3)   | 55(3)   | 44(3)   | -6(2)  | 11(2)  | 3(2)   |
| C(144) | 46(3)   | 60(3)   | 107(5)  | 5(3)   | 21(3)  | -5(3)  |
| C(154) | 57(3)   | 87(4)   | 71(4)   | 25(3)  | 7(3)   | 5(3)   |
| C(164) | 50(3)   | 60(3)   | 38(3)   | -4(2)  | 14(2)  | -1(2)  |
| C(174) | 111(5)  | 66(4)   | 63(4)   | -6(3)  | 37(3)  | 17(3)  |
| C(184) | 69(4)   | 83(4)   | 67(4)   | -8(3)  | 32(3)  | -1(3)  |
| C(194) | 40(3)   | 60(3)   | 42(3)   | -5(2)  | 9(2)   | -3(2)  |
| C(204) | 44(3)   | 70(3)   | 48(3)   | 1(3)   | 9(2)   | -4(2)  |
| C(214) | 56(3)   | 63(3)   | 63(3)   | -16(3) | 9(3)   | -10(3) |
| K(1)   | 56(1)   | 56(1)   | 42(1)   | -5(1)  | 13(1)  | 7(1)   |
| O(10)  | 46(2)   | 49(2)   | 40(2)   | -3(1)  | 14(2)  | -1(1)  |
| C(20)  | 48(3)   | 84(4)   | 60(3)   | 6(3)   | 20(3)  | -7(3)  |
| C(30A) | 55(5)   | 85(6)   | 104(7)  | -24(6) | 17(5)  | -18(5) |
| C(40A) | 80(5)   | 73(5)   | 68(6)   | -14(4) | 7(4)   | -15(4) |
| C(30B) | 62(9)   | 77(13)  | 79(11)  | 12(9)  | 11(7)  | -29(8) |
| C(40B) | 87(10)  | 76(9)   | 43(16)  | -3(8)  | 4(9)   | -24(7) |
| C(50)  | 72(3)   | 42(3)   | 56(3)   | -10(2) | 14(3)  | -4(2)  |
| O(60)  | 50(2)   | 61(2)   | 44(2)   | -7(2)  | 7(2)   | -1(2)  |
| C(70)  | 66(4)   | 63(3)   | 48(3)   | -6(3)  | 5(3)   | -8(3)  |
| C(80)  | 58(4)   | 76(4)   | 75(4)   | -17(3) | 10(3)  | -12(3) |
| C(90)  | 67(4)   | 85(4)   | 66(4)   | 3(3)   | 22(3)  | 0(3)   |
| C(100) | 45(3)   | 80(4)   | 48(3)   | -14(3) | 15(3)  | -3(3)  |
| O(110) | 108(4)  | 97(3)   | 63(3)   | 13(2)  | -2(3)  | 31(3)  |
| C(120) | 110(5)  | 81(4)   | 83(5)   | 3(4)   | 27(4)  | 4(4)   |
| C(130) | 80(5)   | 91(5)   | 122(6)  | 15(4)  | 8(5)   | -6(4)  |
| C(140) | 71(5)   | 136(6)  | 146(7)  | -30(5) | 42(5)  | -7(4)  |
| C(150) | 133(7)  | 204(9)  | 103(7)  | -20(6) | 67(7)  | -18(7) |
| O(16A) | 111(5)  | 208(11) | 121(6)  | 20(6)  | 30(5)  | -26(6) |
| C(17A) | 75(5)   | 114(9)  | 98(6)   | 43(6)  | 10(5)  | -1(5)  |
| O(16B) | 137(10) | 187(12) | 123(12) | 2(10)  | 24(8)  | -4(8)  |
| C(17B) | 125(10) | 178(12) | 53(12)  | -34(9) | 16(8)  | 4(8)   |
| C(180) | 114(5)  | 179(7)  | 96(5)   | -44(5) | -23(4) | 30(5)  |
| C(190) | 158(6)  | 212(8)  | 83(5)   | -1(5)  | 24(4)  | 43(6)  |
| C(200) | 95(4)   | 133(5)  | 83(4)   | -14(4) | 16(3)  | 3(4)   |

---

**Hydrogen coordinates (  $\times 10^4$ ) and isotropic displacement parameters ( $\text{\AA}^2 \times 10^3$ )  
for [LFeSC<sub>6</sub>H<sub>4</sub>Ar(THF)]K (5·THF).**

|        | x     | y     | z    | U(eq) |
|--------|-------|-------|------|-------|
| H(41)  | 5002  | 2593  | 8773 | 51    |
| H(51)  | 4009  | 2931  | 8047 | 50    |
| H(101) | 2968  | 4691  | 6529 | 58    |
| H(121) | 2748  | 2295  | 6249 | 59    |
| H(141) | 4758  | 4537  | 7550 | 53    |
| H(15A) | 3185  | 5153  | 7487 | 90    |
| H(15B) | 3992  | 5418  | 7899 | 90    |
| H(15C) | 3665  | 4507  | 7887 | 90    |
| H(16A) | 4706  | 5298  | 6844 | 88    |
| H(16B) | 4591  | 5899  | 7261 | 88    |
| H(16C) | 3828  | 5629  | 6817 | 88    |
| H(171) | 1997  | 4297  | 5827 | 70    |
| H(18A) | 1296  | 2790  | 5974 | 108   |
| H(18B) | 819   | 3494  | 5618 | 108   |
| H(18C) | 1149  | 3646  | 6200 | 108   |
| H(19A) | 2697  | 3621  | 5366 | 103   |
| H(19B) | 1745  | 3564  | 5112 | 103   |
| H(19C) | 2226  | 2800  | 5404 | 103   |
| H(201) | 4371  | 1707  | 7308 | 60    |
| H(21A) | 3026  | 1382  | 7282 | 115   |
| H(21B) | 3497  | 608   | 7165 | 115   |
| H(21C) | 2860  | 1075  | 6726 | 115   |
| H(22A) | 3919  | 1352  | 6286 | 113   |
| H(22B) | 4466  | 772   | 6704 | 113   |
| H(22C) | 4789  | 1650  | 6612 | 113   |
| H(42)  | 9039  | -618  | 7614 | 56    |
| H(52)  | 8727  | -504  | 6756 | 56    |
| H(102) | 8650  | 1185  | 5233 | 54    |
| H(122) | 6522  | 149   | 5144 | 54    |
| H(142) | 9423  | 1117  | 6551 | 61    |
| H(15D) | 9123  | 2433  | 5857 | 113   |
| H(15E) | 9793  | 2460  | 6383 | 113   |
| H(15F) | 8859  | 2411  | 6352 | 113   |
| H(16D) | 10035 | 432   | 6020 | 107   |
| H(16E) | 10520 | 1236  | 6249 | 107   |
| H(16F) | 9949  | 1237  | 5692 | 107   |
| H(172) | 7567  | 1219  | 4451 | 64    |
| H(18D) | 8381  | 97    | 4499 | 111   |
| H(18E) | 7664  | 56    | 3994 | 111   |
| H(18F) | 7637  | -504  | 4451 | 111   |
| H(19D) | 6242  | 134   | 4317 | 93    |
| H(19E) | 6382  | 745   | 3911 | 93    |
| H(19F) | 6183  | 1093  | 4388 | 93    |
| H(202) | 6774  | 165   | 6440 | 56    |
| H(21D) | 6611  | -1190 | 5788 | 86    |
| H(21E) | 6338  | -1199 | 6280 | 86    |
| H(21F) | 7270  | -1108 | 6315 | 86    |
| H(22D) | 5709  | 795   | 5827 | 84    |
| H(22E) | 5411  | -5    | 6042 | 84    |

|        |      |      |      |     |
|--------|------|------|------|-----|
| H(22F) | 5570 | -30  | 5514 | 84  |
| H(13)  | 6757 | 1790 | 7512 | 42  |
| H(33)  | 7536 | 3387 | 8634 | 51  |
| H(43)  | 8859 | 3055 | 8696 | 55  |
| H(53)  | 9146 | 2054 | 8185 | 56  |
| H(24)  | 6258 | 4971 | 6734 | 52  |
| H(34)  | 5992 | 6352 | 6657 | 54  |
| H(44)  | 6372 | 7112 | 6062 | 56  |
| H(54)  | 6948 | 6470 | 5523 | 52  |
| H(94)  | 6996 | 4081 | 4383 | 55  |
| H(114) | 9133 | 4331 | 5404 | 55  |
| H(134) | 5846 | 5142 | 5047 | 58  |
| H(14A) | 5756 | 3584 | 4596 | 107 |
| H(14B) | 5013 | 4038 | 4707 | 107 |
| H(14C) | 5760 | 3738 | 5153 | 107 |
| H(15G) | 6043 | 5588 | 4271 | 111 |
| H(15H) | 5149 | 5289 | 4230 | 111 |
| H(15I) | 5751 | 4704 | 4058 | 111 |
| H(164) | 8093 | 3593 | 4180 | 59  |
| H(17A) | 9212 | 2906 | 5031 | 117 |
| H(17B) | 9023 | 2550 | 4484 | 117 |
| H(17C) | 8342 | 2538 | 4761 | 117 |
| H(18G) | 9008 | 4675 | 4270 | 105 |
| H(18H) | 9399 | 3838 | 4167 | 105 |
| H(18I) | 9633 | 4204 | 4713 | 105 |
| H(194) | 8389 | 5113 | 6344 | 58  |
| H(20A) | 9300 | 4030 | 6358 | 82  |
| H(20B) | 9731 | 4789 | 6682 | 82  |
| H(20C) | 9843 | 4636 | 6149 | 82  |
| H(21G) | 9273 | 6031 | 5823 | 93  |
| H(21H) | 9329 | 6185 | 6389 | 93  |
| H(21I) | 8499 | 6342 | 5968 | 93  |
| H(20D) | 8732 | 3856 | 7046 | 76  |
| H(20E) | 9102 | 3369 | 7555 | 76  |
| H(20F) | 8968 | 3283 | 7376 | 76  |
| H(20G) | 8726 | 4123 | 7087 | 76  |
| H(30A) | 9685 | 4563 | 7858 | 99  |
| H(30B) | 9092 | 5073 | 7414 | 99  |
| H(40A) | 8783 | 4564 | 8305 | 92  |
| H(40B) | 8603 | 5446 | 8043 | 92  |
| H(30C) | 9825 | 4356 | 7715 | 90  |
| H(30D) | 9376 | 3998 | 8105 | 90  |
| H(40C) | 8630 | 5596 | 7836 | 86  |
| H(40D) | 8402 | 5336 | 7257 | 86  |
| H(50A) | 7437 | 4480 | 7871 | 69  |
| H(50B) | 7573 | 4949 | 7404 | 69  |
| H(50C) | 7848 | 4500 | 8024 | 69  |
| H(50D) | 7272 | 4766 | 7490 | 69  |
| H(70A) | 4987 | 1342 | 4897 | 73  |
| H(70B) | 4801 | 2255 | 4692 | 73  |
| H(80A) | 3666 | 2042 | 4923 | 86  |
| H(80B) | 4118 | 1432 | 5362 | 86  |
| H(90A) | 4089 | 2599 | 5794 | 86  |
| H(90B) | 4237 | 3164 | 5363 | 86  |
| H(10A) | 5527 | 3081 | 5862 | 69  |
| H(10B) | 5393 | 2186 | 6052 | 69  |



|        |       |       |      |     |
|--------|-------|-------|------|-----|
| H(12A) | 10221 | -1183 | 5231 | 110 |
| H(12B) | 9574  | -498  | 5258 | 110 |
| H(13A) | 9320  | -2191 | 5141 | 123 |
| H(13B) | 8773  | -1475 | 4824 | 123 |
| H(14D) | 8303  | -2108 | 5512 | 139 |
| H(14E) | 8262  | -1126 | 5467 | 139 |
| H(15J) | 9164  | -1210 | 6238 | 168 |
| H(15K) | 9488  | -2083 | 6128 | 168 |
| H(17D) | 10642 | 3101  | 7995 | 119 |
| H(17E) | 10446 | 2150  | 7892 | 119 |
| H(17F) | 10530 | 1503  | 7312 | 145 |
| H(17G) | 10368 | 1946  | 7781 | 145 |
| H(18L) | 10757 | 3169  | 7569 | 169 |
| H(18M) | 10304 | 2789  | 7033 | 169 |
| H(18J) | 10374 | 2313  | 7138 | 169 |
| H(18K) | 10533 | 3263  | 7235 | 169 |
| H(19G) | 11614 | 3093  | 7032 | 184 |
| H(19H) | 11559 | 2117  | 7069 | 184 |
| H(20J) | 12038 | 3149  | 7923 | 127 |
| H(20K) | 12653 | 2555  | 7743 | 127 |
| H(20H) | 12308 | 3215  | 7808 | 127 |
| H(20I) | 12537 | 2280  | 7755 | 127 |

---

**Torsion angles [°] for [LFeSC<sub>6</sub>H<sub>4</sub>Ar(THF)]K (5·THF).**

|                           |           |
|---------------------------|-----------|
| Fe(1)-S(11)-C(11)-C(61)   | -172.6(2) |
| Fe(1)-S(11)-C(11)-C(21)   | 9.6(4)    |
| C(61)-C(11)-C(21)-C(31)   | -4.2(5)   |
| S(11)-C(11)-C(21)-C(31)   | 173.5(3)  |
| C(61)-C(11)-C(21)-C(23)   | 171.9(4)  |
| S(11)-C(11)-C(21)-C(23)   | -10.3(6)  |
| C(11)-C(21)-C(31)-F(71)   | 179.6(3)  |
| C(23)-C(21)-C(31)-F(71)   | 3.2(5)    |
| C(11)-C(21)-C(31)-C(41)   | 0.7(6)    |
| C(23)-C(21)-C(31)-C(41)   | -175.6(4) |
| F(71)-C(31)-C(41)-C(51)   | -176.8(3) |
| C(21)-C(31)-C(41)-C(51)   | 2.1(6)    |
| C(31)-C(41)-C(51)-C(61)   | -1.3(6)   |
| C(41)-C(51)-C(61)-C(11)   | -2.3(6)   |
| C(41)-C(51)-C(61)-C(81)   | 176.3(4)  |
| C(21)-C(11)-C(61)-C(51)   | 5.0(5)    |
| S(11)-C(11)-C(61)-C(51)   | -172.9(3) |
| C(21)-C(11)-C(61)-C(81)   | -173.5(4) |
| S(11)-C(11)-C(61)-C(81)   | 8.5(5)    |
| C(51)-C(61)-C(81)-C(91)   | 91.9(5)   |
| C(11)-C(61)-C(81)-C(91)   | -89.5(5)  |
| C(51)-C(61)-C(81)-C(131)  | -86.4(5)  |
| C(11)-C(61)-C(81)-C(131)  | 92.2(5)   |
| C(131)-C(81)-C(91)-C(101) | 1.5(6)    |
| C(61)-C(81)-C(91)-C(101)  | -176.8(4) |
| C(131)-C(81)-C(91)-C(141) | 178.9(4)  |

|                             |           |
|-----------------------------|-----------|
| C(61)-C(81)-C(91)-C(141)    | 0.7(6)    |
| C(81)-C(91)-C(101)-C(111)   | -1.6(6)   |
| C(141)-C(91)-C(101)-C(111)  | -179.0(4) |
| C(91)-C(101)-C(111)-C(121)  | 0.8(6)    |
| C(91)-C(101)-C(111)-C(171)  | -177.8(4) |
| C(101)-C(111)-C(121)-C(131) | 0.1(6)    |
| C(171)-C(111)-C(121)-C(131) | 178.7(4)  |
| C(91)-C(81)-C(131)-C(121)   | -0.6(6)   |
| C(61)-C(81)-C(131)-C(121)   | 177.6(4)  |
| C(91)-C(81)-C(131)-C(201)   | 178.3(4)  |
| C(61)-C(81)-C(131)-C(201)   | -3.4(6)   |
| C(111)-C(121)-C(131)-C(81)  | -0.2(6)   |
| C(111)-C(121)-C(131)-C(201) | -179.2(4) |
| C(81)-C(91)-C(141)-C(161)   | 138.9(4)  |
| C(101)-C(91)-C(141)-C(161)  | -43.7(5)  |
| C(81)-C(91)-C(141)-C(151)   | -97.9(5)  |
| C(101)-C(91)-C(141)-C(151)  | 79.5(5)   |
| C(101)-C(111)-C(171)-C(191) | 119.8(5)  |
| C(121)-C(111)-C(171)-C(191) | -58.7(6)  |
| C(101)-C(111)-C(171)-C(181) | -112.9(5) |
| C(121)-C(111)-C(171)-C(181) | 68.6(5)   |
| C(81)-C(131)-C(201)-C(221)  | -110.6(5) |
| C(121)-C(131)-C(201)-C(221) | 68.3(5)   |
| C(81)-C(131)-C(201)-C(211)  | 124.3(4)  |
| C(121)-C(131)-C(201)-C(211) | -56.8(5)  |
| Fe(1)-S(21)-C(12)-C(22)     | 6.6(4)    |
| K(1)-S(21)-C(12)-C(22)      | 165.9(3)  |
| Fe(1)-S(21)-C(12)-C(62)     | -176.1(3) |
| K(1)-S(21)-C(12)-C(62)      | -16.8(4)  |
| C(62)-C(12)-C(22)-C(32)     | -1.5(6)   |
| S(21)-C(12)-C(22)-C(32)     | 175.7(3)  |
| C(62)-C(12)-C(22)-C(63)     | 178.4(4)  |
| S(21)-C(12)-C(22)-C(63)     | -4.4(6)   |
| C(12)-C(22)-C(32)-C(42)     | 0.1(7)    |
| C(63)-C(22)-C(32)-C(42)     | -179.8(4) |
| C(12)-C(22)-C(32)-F(72)     | -176.7(4) |
| C(63)-C(22)-C(32)-F(72)     | 3.4(6)    |
| F(72)-C(32)-C(42)-C(52)     | 178.2(4)  |
| C(22)-C(32)-C(42)-C(52)     | 1.4(7)    |
| C(32)-C(42)-C(52)-C(62)     | -1.5(6)   |
| C(42)-C(52)-C(62)-C(12)     | 0.2(6)    |
| C(42)-C(52)-C(62)-C(82)     | -178.6(4) |
| C(22)-C(12)-C(62)-C(52)     | 1.4(6)    |
| S(21)-C(12)-C(62)-C(52)     | -176.0(3) |
| C(22)-C(12)-C(62)-C(82)     | -179.8(4) |
| S(21)-C(12)-C(62)-C(82)     | 2.7(5)    |
| C(52)-C(62)-C(82)-C(92)     | -88.4(5)  |
| C(12)-C(62)-C(82)-C(92)     | 92.9(5)   |
| C(52)-C(62)-C(82)-C(132)    | 91.8(5)   |
| C(12)-C(62)-C(82)-C(132)    | -86.9(5)  |
| C(132)-C(82)-C(92)-C(102)   | -0.2(6)   |
| C(62)-C(82)-C(92)-C(102)    | -180.0(4) |
| C(132)-C(82)-C(92)-C(142)   | 177.7(4)  |
| C(62)-C(82)-C(92)-C(142)    | -2.1(6)   |
| C(132)-C(82)-C(92)-K(1)     | 66.9(4)   |
| C(62)-C(82)-C(92)-K(1)      | -112.9(3) |

|                             |           |
|-----------------------------|-----------|
| C(82)-C(92)-C(102)-C(112)   | -0.3(6)   |
| C(142)-C(92)-C(102)-C(112)  | -178.3(4) |
| K(1)-C(92)-C(102)-C(112)    | -75.8(4)  |
| C(82)-C(92)-C(102)-K(1)     | 75.5(3)   |
| C(142)-C(92)-C(102)-K(1)    | -102.5(3) |
| C(92)-C(102)-C(112)-C(122)  | 0.2(6)    |
| K(1)-C(102)-C(112)-C(122)   | -77.4(3)  |
| C(92)-C(102)-C(112)-C(172)  | -178.3(4) |
| K(1)-C(102)-C(112)-C(172)   | 104.2(4)  |
| C(92)-C(102)-C(112)-K(1)    | 77.5(4)   |
| C(102)-C(112)-C(122)-C(132) | 0.5(6)    |
| C(172)-C(112)-C(122)-C(132) | 178.9(4)  |
| K(1)-C(112)-C(122)-C(132)   | -70.3(4)  |
| C(92)-C(82)-C(132)-C(122)   | 0.8(6)    |
| C(62)-C(82)-C(132)-C(122)   | -179.4(4) |
| C(92)-C(82)-C(132)-C(202)   | 178.3(4)  |
| C(62)-C(82)-C(132)-C(202)   | -1.9(6)   |
| C(112)-C(122)-C(132)-C(82)  | -1.0(6)   |
| C(112)-C(122)-C(132)-C(202) | -178.5(4) |
| C(82)-C(92)-C(142)-C(162)   | 134.6(4)  |
| C(102)-C(92)-C(142)-C(162)  | -47.6(5)  |
| K(1)-C(92)-C(142)-C(162)    | -127.0(3) |
| C(82)-C(92)-C(142)-C(152)   | -101.5(5) |
| C(102)-C(92)-C(142)-C(152)  | 76.4(5)   |
| K(1)-C(92)-C(142)-C(152)    | -3.1(4)   |
| C(102)-C(112)-C(172)-C(182) | 76.0(5)   |
| C(122)-C(112)-C(172)-C(182) | -102.4(5) |
| K(1)-C(112)-C(172)-C(182)   | 159.5(3)  |
| C(102)-C(112)-C(172)-C(192) | -158.2(4) |
| C(122)-C(112)-C(172)-C(192) | 23.5(6)   |
| K(1)-C(112)-C(172)-C(192)   | -74.7(4)  |
| C(82)-C(132)-C(202)-C(222)  | 139.7(4)  |
| C(122)-C(132)-C(202)-C(222) | -42.9(5)  |
| C(82)-C(132)-C(202)-C(212)  | -94.8(5)  |
| C(122)-C(132)-C(202)-C(212) | 82.6(5)   |
| C(63)-C(13)-C(23)-C(33)     | 0.8(6)    |
| C(63)-C(13)-C(23)-C(21)     | -173.9(4) |
| C(31)-C(21)-C(23)-C(13)     | 117.9(4)  |
| C(11)-C(21)-C(23)-C(13)     | -58.2(5)  |
| C(31)-C(21)-C(23)-C(33)     | -56.6(5)  |
| C(11)-C(21)-C(23)-C(33)     | 127.3(4)  |
| C(13)-C(23)-C(33)-C(43)     | 0.2(6)    |
| C(21)-C(23)-C(33)-C(43)     | 174.8(4)  |
| C(23)-C(33)-C(43)-C(53)     | -1.2(6)   |
| C(33)-C(43)-C(53)-C(63)     | 1.3(6)    |
| C(43)-C(53)-C(63)-C(13)     | -0.2(6)   |
| C(43)-C(53)-C(63)-C(22)     | -178.5(4) |
| C(23)-C(13)-C(63)-C(53)     | -0.8(6)   |
| C(23)-C(13)-C(63)-C(22)     | 177.4(4)  |
| C(32)-C(22)-C(63)-C(53)     | 59.9(5)   |
| C(12)-C(22)-C(63)-C(53)     | -120.0(5) |
| C(32)-C(22)-C(63)-C(13)     | -118.3(4) |
| C(12)-C(22)-C(63)-C(13)     | 61.8(6)   |
| Fe(1)-S(31)-C(14)-C(24)     | -12.1(4)  |
| K(1)-S(31)-C(14)-C(24)      | 146.3(3)  |
| Fe(1)-S(31)-C(14)-C(64)     | 165.8(3)  |

|                             |            |
|-----------------------------|------------|
| K(1)-S(31)-C(14)-C(64)      | -35.7(4)   |
| C(64)-C(14)-C(24)-C(34)     | -2.6(6)    |
| S(31)-C(14)-C(24)-C(34)     | 175.4(3)   |
| C(14)-C(24)-C(34)-C(44)     | 0.3(6)     |
| C(24)-C(34)-C(44)-C(54)     | 2.0(6)     |
| C(34)-C(44)-C(54)-C(64)     | -1.9(6)    |
| C(44)-C(54)-C(64)-C(14)     | -0.4(6)    |
| C(44)-C(54)-C(64)-C(74)     | -179.4(4)  |
| C(24)-C(14)-C(64)-C(54)     | 2.6(6)     |
| S(31)-C(14)-C(64)-C(54)     | -175.4(3)  |
| C(24)-C(14)-C(64)-C(74)     | -178.4(4)  |
| S(31)-C(14)-C(64)-C(74)     | 3.5(5)     |
| C(54)-C(64)-C(74)-C(124)    | 96.5(5)    |
| C(14)-C(64)-C(74)-C(124)    | -82.4(5)   |
| C(54)-C(64)-C(74)-C(84)     | -84.4(5)   |
| C(14)-C(64)-C(74)-C(84)     | 96.6(5)    |
| C(124)-C(74)-C(84)-C(94)    | 1.0(6)     |
| C(64)-C(74)-C(84)-C(94)     | -178.1(4)  |
| C(124)-C(74)-C(84)-C(134)   | 179.7(4)   |
| C(64)-C(74)-C(84)-C(134)    | 0.7(6)     |
| C(74)-C(84)-C(94)-C(104)    | 0.3(6)     |
| C(134)-C(84)-C(94)-C(104)   | -178.5(4)  |
| C(84)-C(94)-C(104)-C(114)   | -1.4(6)    |
| C(84)-C(94)-C(104)-C(164)   | 178.9(4)   |
| C(94)-C(104)-C(114)-C(124)  | 1.3(6)     |
| C(164)-C(104)-C(114)-C(124) | -179.0(4)  |
| C(104)-C(114)-C(124)-C(74)  | -0.1(6)    |
| C(104)-C(114)-C(124)-C(194) | -179.4(4)  |
| C(84)-C(74)-C(124)-C(114)   | -1.1(6)    |
| C(64)-C(74)-C(124)-C(114)   | 178.0(4)   |
| C(84)-C(74)-C(124)-C(194)   | 178.2(4)   |
| C(64)-C(74)-C(124)-C(194)   | -2.7(6)    |
| C(94)-C(84)-C(134)-C(144)   | 71.5(5)    |
| C(74)-C(84)-C(134)-C(144)   | -107.2(5)  |
| C(94)-C(84)-C(134)-C(154)   | -49.6(6)   |
| C(74)-C(84)-C(134)-C(154)   | 131.7(4)   |
| C(94)-C(104)-C(164)-C(184)  | 125.7(5)   |
| C(114)-C(104)-C(164)-C(184) | -54.0(6)   |
| C(94)-C(104)-C(164)-C(174)  | -110.1(5)  |
| C(114)-C(104)-C(164)-C(174) | 70.2(5)    |
| C(114)-C(124)-C(194)-C(204) | -32.4(5)   |
| C(74)-C(124)-C(194)-C(204)  | 148.3(4)   |
| C(114)-C(124)-C(194)-C(214) | 92.1(5)    |
| C(74)-C(124)-C(194)-C(214)  | -87.2(5)   |
| C(50)-O(10)-C(20)-C(30B)    | 39.1(15)   |
| Fe(1)-O(10)-C(20)-C(30B)    | -176.3(15) |
| C(50)-O(10)-C(20)-C(30A)    | 9.0(6)     |
| Fe(1)-O(10)-C(20)-C(30A)    | 153.6(5)   |
| O(10)-C(20)-C(30A)-C(40A)   | 17.0(10)   |
| C(20)-C(30A)-C(40A)-C(50)   | -35.0(11)  |
| O(10)-C(20)-C(30B)-C(40B)   | -56.6(16)  |
| C(20)-O(10)-C(50)-C(40A)    | -32.3(6)   |
| Fe(1)-O(10)-C(50)-C(40A)    | -178.5(5)  |
| C(20)-O(10)-C(50)-C(40B)    | 13.0(12)   |
| Fe(1)-O(10)-C(50)-C(40B)    | -133.2(12) |
| C(30A)-C(40A)-C(50)-O(10)   | 41.2(9)    |

|                             |           |
|-----------------------------|-----------|
| C(30B)-C(40B)-C(50)-O(10)   | -39.1(15) |
| C(100)-O(60)-C(70)-C(80)    | -11.0(5)  |
| K(1)-O(60)-C(70)-C(80)      | -176.5(3) |
| O(60)-C(70)-C(80)-C(90)     | 30.7(5)   |
| C(70)-C(80)-C(90)-C(100)    | -37.4(5)  |
| C(70)-O(60)-C(100)-C(90)    | -12.9(5)  |
| K(1)-O(60)-C(100)-C(90)     | 156.5(3)  |
| C(70)-O(60)-C(100)-K(1)     | -169.3(4) |
| C(80)-C(90)-C(100)-O(60)    | 31.6(5)   |
| C(80)-C(90)-C(100)-K(1)     | 60.9(7)   |
| C(150)-O(110)-C(120)-C(130) | -19.6(7)  |
| O(110)-C(120)-C(130)-C(140) | 37.8(6)   |
| C(120)-C(130)-C(140)-C(150) | -38.9(7)  |
| C(120)-O(110)-C(150)-C(140) | -6.0(8)   |
| C(130)-C(140)-C(150)-O(110) | 27.6(8)   |
| C(200)-O(16A)-C(17A)-C(180) | 16.3(11)  |
| C(200)-O(16B)-C(17B)-C(180) | -1.1(18)  |
| O(16B)-C(17B)-C(180)-C(190) | 37.3(15)  |
| O(16A)-C(17A)-C(180)-C(190) | -2.2(12)  |
| C(17B)-C(180)-C(190)-C(200) | -69.9(11) |
| C(17A)-C(180)-C(190)-C(200) | -13.3(11) |
| C(180)-C(190)-C(200)-O(16A) | 22.3(10)  |
| C(180)-C(190)-C(200)-O(16B) | 58.9(10)  |
| C(17A)-O(16A)-C(200)-C(190) | -25.4(11) |
| C(17B)-O(16B)-C(200)-C(190) | -35.0(15) |

---

Symmetry transformations used to generate equivalent atoms:
